# Supplementary material for: Enantioselective synthesis of β-aryl-γ-lactam derivatives via Heck–Matsuda desymmetrization of N -protected 2,5-dihydro-1 H -pyrroles
Source: publisher site journal article supplement (doi:10.3762/bjoc.20.84), 2024-04-29
Supplement: Additional file 1 [file 1860-5397-20-84-S1.pdf]

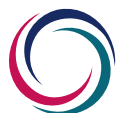

## Supporting Information

for

### Enantioselective synthesis of $\beta$ -aryl- $\gamma$ -lactam derivatives via Heck–Matsuda desymmetrization of *N*-protected 2,5-dihydro-1*H*-pyrroles

Arnaldo G. de Oliveira Jr., Martí F. Wang, Rafaela C. Carmona, Danilo M. Lustosa, Sergei A. Gorbатов and Carlos R. D. Correia

*Beilstein J. Org. Chem.* **2024**, *20*, 940–949. doi:10.3762/bjoc.20.84

### Experimental procedures and characterization data for the new compounds

## 1. General information

**Heck–Matsuda reactions** were carried out in a 4-mL screw-top vial under air with no precautions taken to exclude moisture. Reaction temperatures are reported as the temperature of the heat transfer medium surrounding the vessel. Yields refer to isolated compounds, unless stated otherwise. Solvents used for chromatography were technical grade and were distilled prior to use. Aryldiazonium tetrafluoroborate salts were prepared according to the literature. Ligands[1–4] and olefins[5–8] were prepared according to the literature. Commercially available chemicals were purchased and used as received, unless otherwise noted. Racemic samples were prepared following general procedures but without the use of any ligand.

**Thin layer chromatography** (TLC) was performed employing Merck® Silica gel 60 F254 fluorescent treated plates. Visualization was accomplished with UV light (254 nm), KMnO<sub>4</sub>, *p*-anisaldehyde, ceric ammonium molybdate staining solution followed by heating, or Dragendorff reagent.

**Flash column chromatography** (FCC) purifications were performed by flash column chromatography using Merck® Silica gel 60 (230–400 mesh) as stationary phase and on a Biotage-Isolera One flash purification system employing Biotage® SNAP Ultra 10 g, 25 g or 50 g as stationary phase operating in gradient mode (EtOAc/hexanes).

**Optical rotation** data were measured on a Perkin Elmer 341 polarimeter with a sodium lamp using a 1.0 cm quartz glass cell and are reported as follows:  $[\alpha]_D^{25}$  (°C) (c (g/100 mL), solvent).

**NMR spectra** were recorded at various field strengths, as indicated, using Bruker DPX250 (250 MHz for <sup>1</sup>H NMR and 62.5 MHz for <sup>13</sup>C NMR), Bruker Avance 400 (400 MHz for <sup>1</sup>H NMR and 100 MHz for <sup>13</sup>C NMR), Bruker Avance 500 (500 MHz for <sup>1</sup>H and 125 MHz for <sup>13</sup>C NMR), or Bruker Avance 600 (600 MHz for <sup>1</sup>H and 150 MHz for <sup>13</sup>C NMR) spectrometers. 1,3-Bis(trifluoromethyl)-5-bromobenzene was used as internal standard for the determination of chemical yields by <sup>1</sup>H NMR. Chemical shifts (δ) are reported in ppm using residual undeuterated solvent as an internal standard (CHCl<sub>3</sub> at 7.26 ppm for <sup>1</sup>H NMR spectra and CDCl<sub>3</sub> at 77.16 ppm for <sup>13</sup>C NMR spectra). Multiplicity data are reported as follows: s = singlet, d = doublet, t = triplet, q = quartet, quint = quintet, sext = sextet, br s = broad singlet, dd = doublet of doublets, dt = doublet of triplets, ddd = doublet of doublet of doublets, ddt = doublet of doublet of triplets, dtd = doublet of triplet of doublets, dqd = doublet of quartet of doublets, and m = multiplet. The multiplicity is followed by the coupling constant(s) in Hz and integration.

**High-resolution mass spectra** (HRMS) was recorded using electrospray ionization (ESI) on a Waters Xevo Q-ToF, Bruker qTOF Impact II and Q-Exactive Plus-Thermo Fisher Scientific.

**Enantiomeric ratios** (er) were calculated through integration of enantiomers corresponding signals, set by racemic samples. The products were analyzed through high-performance liquid chromatography (HPLC) on an

Agilent Technologies 1260 Infinity with a DAD detector equipped with Daicel Chiralpak® chiral columns as stationary phase and hexanes:iPrOH mixtures as mobile phase, or through supercritical fluid chromatography (SFC) performed on an Agilent Technologies 1260 SFC Infinity with an DAD detector equipped with Daicel Chiralpak® chiral columns as the stationary phase and CO<sub>2</sub>:MeOH mixtures as the mobile phase.

## 2. Preparation and characterization of substrates and reagents

Ligands **L1**, **L3**, **L4**, **L5**, and **L6** were prepared according to previously reported procedures [1-4].

Olefins **1a**, **1b**, **1c**, and **1d** were prepared according to previously reported procedures [5-8]. They are also commercially available.

### 2.1 Preparation of ligand **L2**

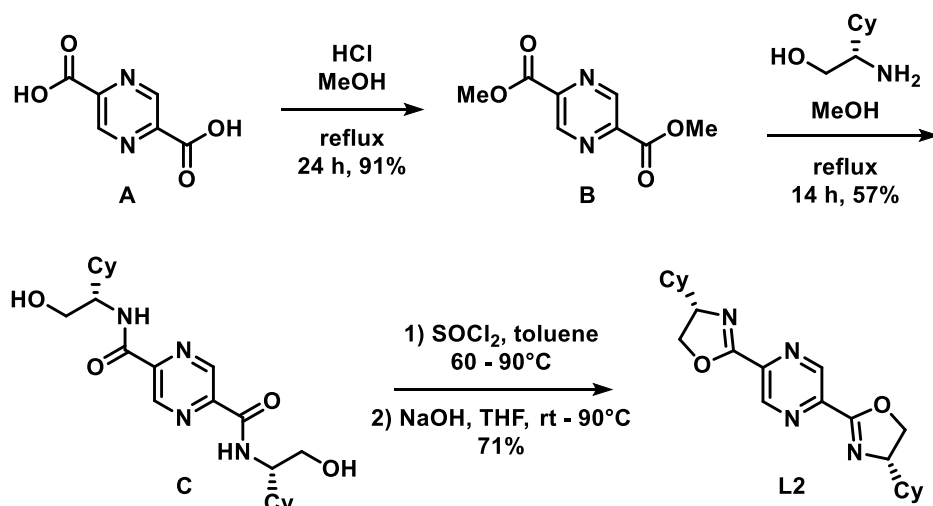

**Figure S11** – Synthesis of ligand **L2**.

**Esterification:** The diacid **A** (1.00 g, 5.95 mmol) was dissolved in 17 mL of MeOH. Then, 0.5 mL HCl 37% (w/w) was added and the mixture was heated to reflux for 24 h. At the end of this period, the solvent was evaporated and the residue dissolved in 25 mL of saturated NaHCO<sub>3</sub> solution. This solution was washed with 3 × 100 mL of dichloromethane and after drying with Na<sub>2</sub>SO<sub>4</sub>, filtration and evaporation provided 1.06 g (5.4 mmol, 91%) of diester **B**. This crude material was used directly in the next step.

**Bisamide synthesis:** A solution of the diester **B** (1.06 g, 5.4 mmol) and (*S*)-2-amino-2-cyclohexylethan-1-ol (1.62 g, 11.34 mmol) in 20 mL of MeOH was heated to reflux for 14 h. Next, the solvent was evaporated, the residue was rinsed with 2 × 15 mL of MeOH to furnish the bisamide **C** in 57% yield (1.29 g, 3.08 mmol). This crude material was used directly in the next step.

**Oxazoline synthesis:** The bisamide **C** (1.29 g, 3.08 mmol) was dissolved in 30 mL dry toluene under nitrogen atmosphere. After 5 minutes of stirring, distilled SOCl<sub>2</sub> (1.468 g, 12.32 mmol, 0.90 mL) was added slowly. The temperature was adjusted to 60 °C and the reaction was stirred for 1 h, followed by 4 h at 110 °C. After cooling to room temperature, the solvent was evaporated, and the crude was dissolved in dichloromethane

and 15 mL of an aqueous solution of KOH 20% were added under stirring. The organic phase was stored, and the aqueous phase was further extracted with dichloromethane. The combined organic phases were washed with brine, dried over Na<sub>2</sub>SO<sub>4</sub> and the solvent was removed under vacuum. The crude was then dissolved in 60 mL of THF, followed by addition of an ethanolic solution of NaOH (0.300 g in 16 mL of ethanol) and the reaction was stirred for 30 minutes at room temperature and for more 3 h at 90 °C. After evaporation of the solvent, the crude was redissolved in dichloromethane, and the organic phase was washed with NaHCO<sub>3</sub>(sat) solution and then separated in a separation funnel. The aqueous phase was washed with dichloromethane, and the combined organic phases were washed with brine, dried over Na<sub>2</sub>SO<sub>4</sub> and concentrated in vacuum. The product was purified by column chromatography (AcOEt) and ligand **L2** was obtained as a yellowish solid (0.842 g, 2.20 mmol, 71%).

### 2,5-Bis((S)-4-cyclohexyl-4,5-dihydrooxazol-2-yl)pyrazine (**L2**)

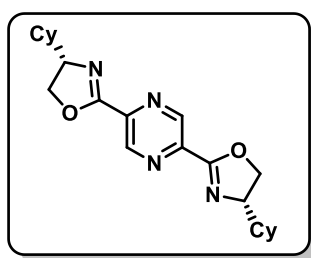

842 mg, 2.20 mmol, 37% yield. Yellowish solid.

<sup>1</sup>H NMR (600 MHz, CDCl<sub>3</sub>) δ 9.27 (s, 2H), 4.52 (dd, J = 9.7, 8.2 Hz, 2H), 4.26 (t, J = 8.5 Hz, 2H), 4.23 – 4.16 (m, 2H), 2.16 – 0.90 (m, 22H).

<sup>13</sup>C NMR (63 MHz, CDCl<sub>3</sub>) δ 160.45, 144.45, 143.50, 72.60, 71.29, 42.78, 29.74, 28.99, 26.53, 26.07.

[α]<sub>D</sub><sup>20</sup> = -48 (c 0.10, MeOH)

HRMS (ESI+) *m/z* calculated for C<sub>22</sub>H<sub>30</sub>N<sub>4</sub>O<sub>2</sub>+H<sup>+</sup> [M+H]<sup>+</sup> 383.24415, found 383.24403.

mp: 144-145°C.



### 3. General procedure for the enantioselective Heck–Matsuda reactions and characterization

#### 3.1 Considerations on the experimental procedure

During the development of the scope, the hemiaminal ethers (Heck–Matsuda products) were found to be somehow unstable when concentrated to dryness during work-up. We hypothesize that a possible cause of such instability might consist in the formation of a highly electrophilic iminium ion upon protonation of the hemiaminal ether by silica or glassware acidity and further elimination of methanol favored by the evaporation process. Although we found that careful control of the drying conditions avoids complete drying of the crude mixture prevents degradation of the Heck products, we established a robust protocol consisting of successive additions of acetone to the crude mixture, followed by careful rotaevaporation. This procedure gradually removes most of the methanol, allowing the sequential Jones oxidation step to take place without any significant losses. For clarity, the steps of the procedure are depicted in Figure SI2 to SI7.

**NOTE: General Procedure (i) and (ii)** differ only in the total volume of methanol added to the reaction (1.0 and 1.5 mL, respectively).

#### 3.2 General procedure (i) – from olefins **1a** and **1b**

Pd(TFA)<sub>2</sub> (4.99 mg, 5 mol %, 0.015 mmol), ligand (*S*)-PyraBox (**L1**, 5.95 mg, 6 mol %, 0.018 mmol), and methanol (0.7 mL) were added to a 4 mL screw-top vial containing a magnetic stirrer. The resulting light-orange solution was then stirred at 40 °C for 15 min to form the catalyst complex. After cooling to room temperature, it was added ZnCO<sub>3</sub> (0.15 mmol, 18.8 mg, 0.5 equiv), the olefin **1a** or **1b** (0.30 mmol), the diazonium salt (0.60 mmol, 2 equiv) and the vial rinsed with MeOH (0.3 mL). The vial was then capped (not tightly to allow the release of N<sub>2</sub>), and stirred for 4 h at 40 °C. The reaction vessel was then cooled to room temperature, and the mixture was poured onto a pad of silica gel (230–400 mesh; column height ≈ 4 cm; diameter ≈ 2 cm) previously washed with EtOAc/hexanes 1:1 mixture. The silica pad was then eluted with about 50 mL of 1:1 EtOAc/hexanes. The crude was then concentrated to approximately 0.5 mL, followed by the addition of 30 mL of acetone. The crude was concentrated again to ≈ 0.5 mL, followed by another addition of 30 mL of acetone. Finally, the crude was concentrated again to ≈ 0.5 mL, transferred to a 15 mL vial, the crude into dissolved in 6 mL of acetone:H<sub>2</sub>O 3:1 ratio. Next, 1.0 mL of the Jones' reagent (2.5 M) was added and the reaction stirred for 90 minutes at rt. After this period, 2.0 mL of iPrOH were added and the reaction stirred for another 15 minutes. The solvent was removed under reduced pressure and the reaction mixture was poured onto a pad of silica gel (230–400 mesh; column height ≈ 1.5 cm; diameter ≈ 2 cm) having anhydrous Na<sub>2</sub>SO<sub>4</sub> on top of it (≈ 1.5 cm). The pad was then washed with ≈ 50 mL of 1:1 EtOAc/hexanes. The solvent was then rotaevaporated, and the crude product was purified by column chromatography on silica gel with EtOAc/ hexanes as the eluent to provide the corresponding lactams.

#### 3.3 General procedure (ii) – from olefins **1c** and **1d**

The same procedure as above, but with a slight difference in its first part regarding the volume of MeOH needed to solubilize the nosylated pyrrolines **1c**, and **1d**, as follows: Pd(TFA)<sub>2</sub> (4.99 mg, 5 mol %, 0.015 mmol), ligand

(*S*)-PyraBox (**L1**, 5.95 mg, 6 mol %, 0.018 mmol), and methanol (0.7 mL) were added to a 4 mL screw-top vial containing a magnetic stirrer. The resulting light-orange solution was then stirred at 40 °C for 15 min to form the catalyst complex. After cooling to room temperature, it was added  $\text{ZnCO}_3$  (0.15 mmol, 18.8 mg, 0.5 equiv), the olefin **1a** or **1b** (0.30 mmol), the diazonium salt (0.60 mmol, 2 equiv) and the vial rinsed with MeOH (0.8 mL).

### 3.4 Illustration of the general procedures:

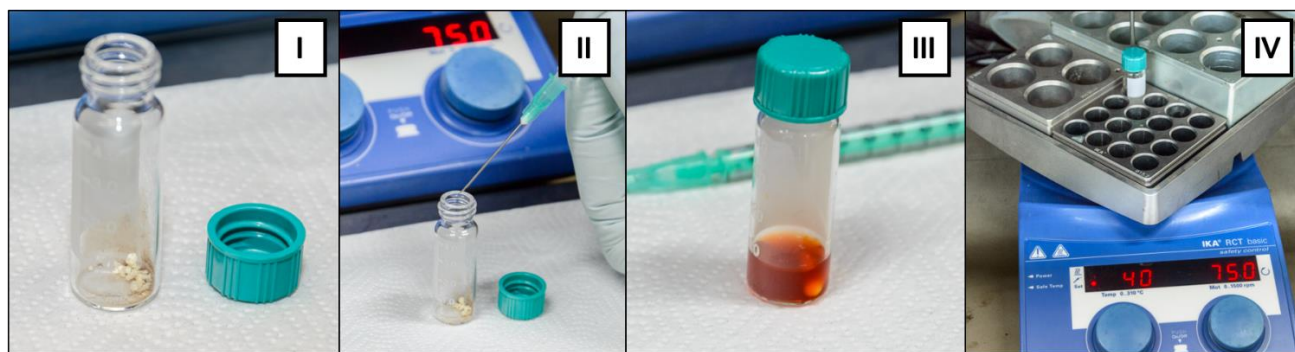

**Figure S12** - (I) Weighting of  $\text{Pd}(\text{TFA})_2$  and (*S*)-PyraBox ligand (**L1**); (II) addition of MeOH; (III) light-orange solution resulting from solubilization of  $\text{Pd}(\text{TFA})_2$  and ligand **L1**; (IV) formation of the catalyst complex upon heating at 40 °C for 15 min.

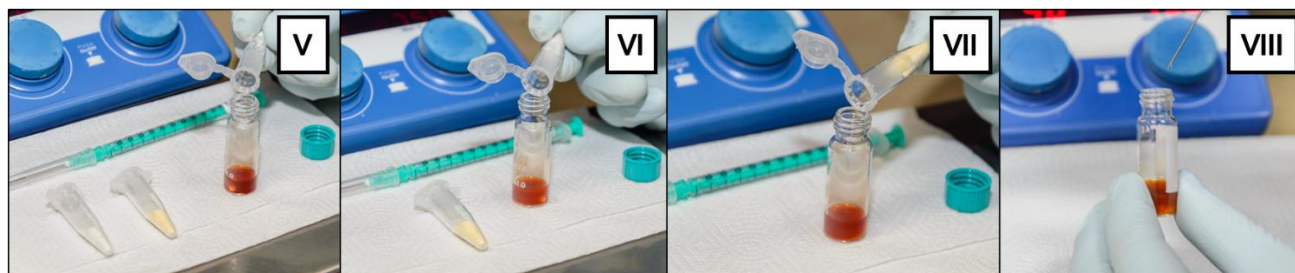

**Figure S13** - (V) Addition of  $\text{ZnCO}_3$  to the catalyst solution; (VI) addition of the olefin; (VII) addition of diazonium salt; (VIII) rinsing the vial with MeOH.

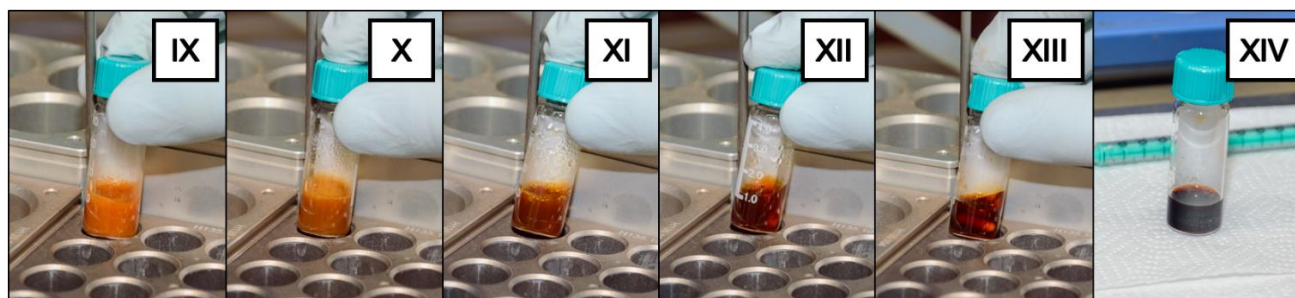

**Figure S14** - Solubilization of the starting materials over time: (IX) Heck–Matsuda reaction  $t = 0$  min; (X)  $t = 5$  min; (XI)  $t = 10$  min; (XII)  $t = 15$  min; (XIII)  $t = 60$  min; (XIV)  $t = 240$  min – end of the reaction. Although colors may vary with the diazonium salt used, the end of the reaction is indicated by the dark reddish black mixture.

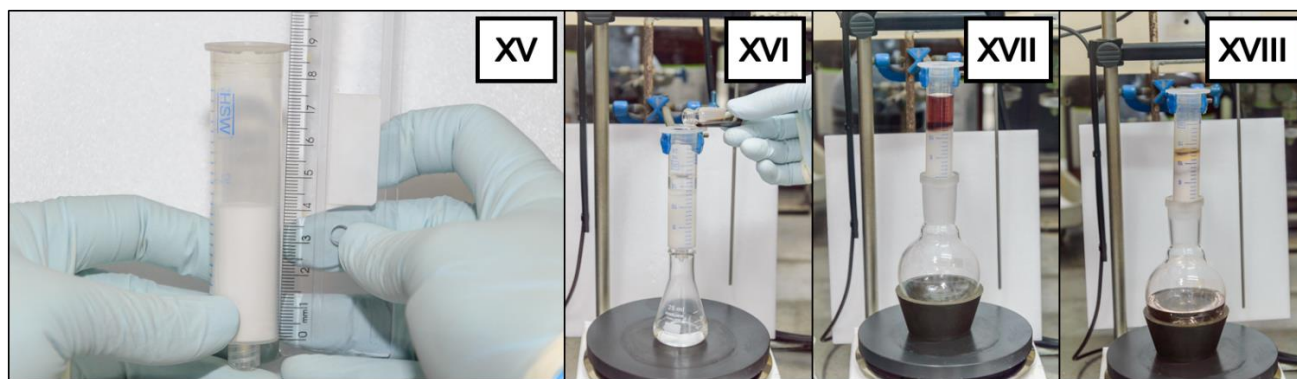

**Figure S15** - Work up procedure for the Heck–Matsuda reaction: (XV) silica pad (height: 4 cm, diameter: 2 cm; (XVI) pouring of the reaction onto the pre-conditioned silica pad; (XVII) elution; (XVIII) diluted reaction media after elution.

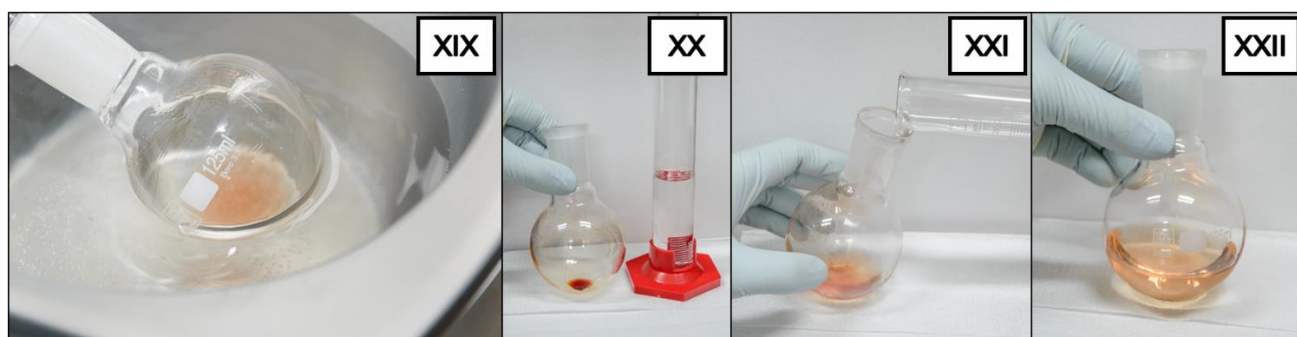

**Figure S16** - Critical evaporation step. (XIX) diluted reaction media concentration on rotatory evaporator; (XX) concentrated (not completely dry!) until approximately 0.5 mL; (XXI) addition of 30 mL of acetone to the concentrated crude; (XXII) crude diluted in acetone ready for another evaporation step.

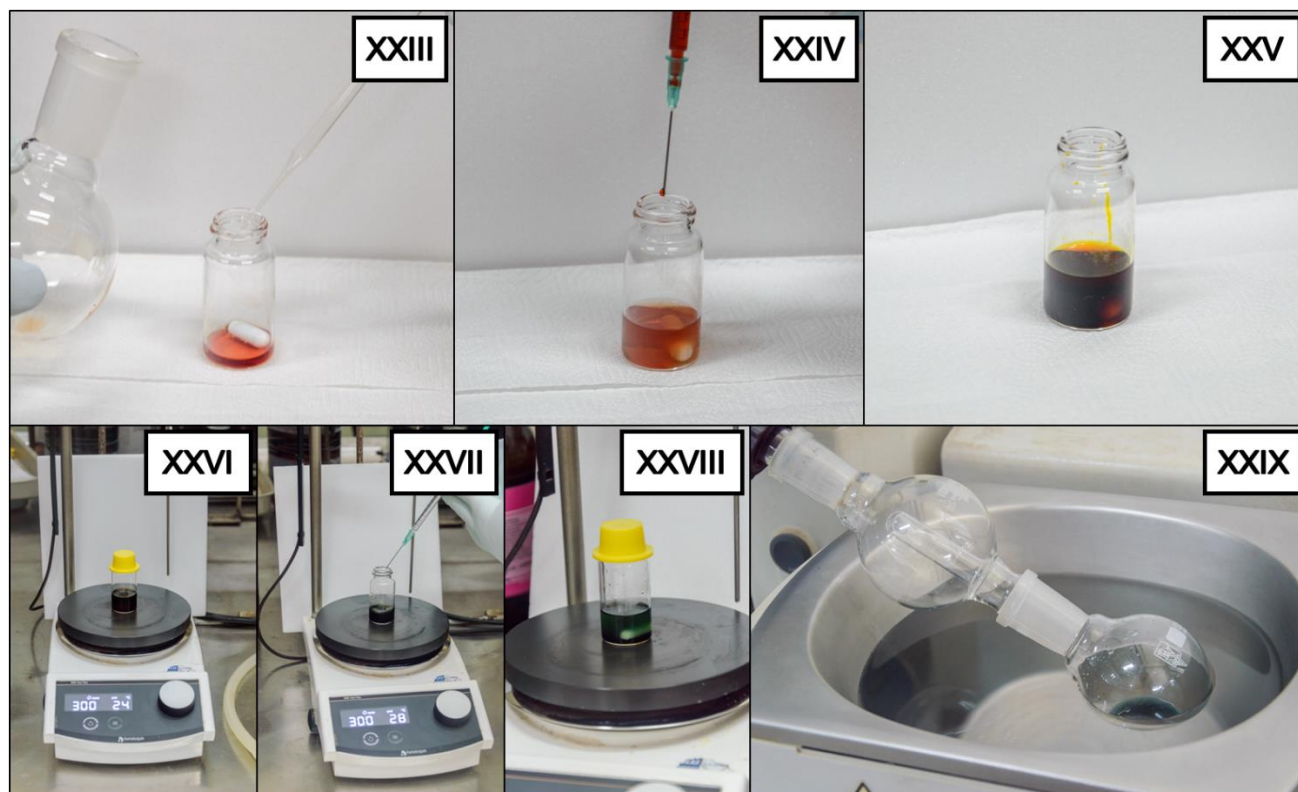

**Figure S17** - Jones oxidation reaction setup: (XXIII) concentrated crude reaction media transference to a 15 mL vial with acetone:H<sub>2</sub>O 4:1 (v/v); (XXIV) addition of the Jones solution 2.5 M; (XXV) reaction media after Jones solution addition; (XXVI) Jones oxidation in progress; (XXVII) addition of iPrOH by the end of reaction; (XXVIII) reaction media after deactivation of Jones solution by reduction of Cr(VI) to Cr(III); (XXIX) concentration of the crude reaction media in rotatory evaporation (no extra precautions needed at this point).

#### 4 Characterization of products

##### *tert*-Butyl (*R*)-4-(4-methoxyphenyl)-2-oxopyrrolidine-1-carboxylate (4aa) [9]

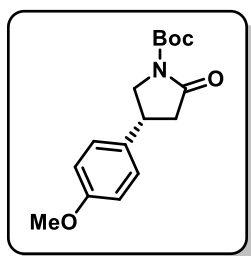

Following General Procedure (i). Colorless oil.

(59.3 mg, 0.204 mmol, 68% yield). 78:22 *er*.

The enantiomeric ratio was determined by SFC analysis in comparison to a racemic material using Daicel Chiralpak® IC column (4.6 mm × 250 mm) at 30 °C and 10% MeOH in supercritical CO<sub>2</sub> (3.0 mL min<sup>-1</sup>) as mobile phase, λ = 230 nm (*t* = 7.9 min (minor), 9.3 min (major).

<sup>1</sup>H NMR (400 MHz, CDCl<sub>3</sub>) δ 7.14 (d, *J* = 8.7 Hz, 2H), 6.87 (d, *J* = 8.7 Hz, 2H), 4.11 (dd, *J* = 10.7, 8.1 Hz, 1H), 3.78 (s, 3H), 3.62 (dd, *J* = 10.8, 8.6 Hz, 1H), 3.47 (quint, *J* = 8.0 Hz, 1H), 2.84 (dd, *J* = 17.2, 8.4 Hz, 1H), 2.65 (dd, *J* = 17.2, 10.0 Hz, 1H), 1.51 (s, 9H).

<sup>13</sup>C NMR (101 MHz, CDCl<sub>3</sub>) δ 173.2, 158.9, 149.9, 132.6, 127.8, 114.4, 83.0, 55.4, 53.4, 40.6, 35.8, 28.1.

HRMS (ESI+) *m/z* calculated for C<sub>16</sub>H<sub>21</sub>NO<sub>4</sub>+Na<sup>+</sup> [*M*+Na]<sup>+</sup> 314.13628, found 314.13556.



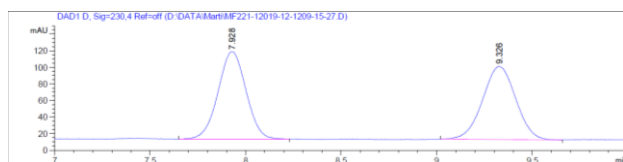

Signal 3: DAD1 D, Sig=230,4 Ref=off

| Peak # | RetTime [min] | Type | Width [min] | Area [mAU*s] | Height [mAU] | Area %  |
|--------|---------------|------|-------------|--------------|--------------|---------|
| 1      | 7.928         | BB   | 0.1542      | 1073.96216   | 105.52740    | 50.2413 |
| 2      | 9.326         | BB   | 0.1718      | 1063.64502   | 88.12798     | 49.7587 |

Totals : 2137.60718 193.65539

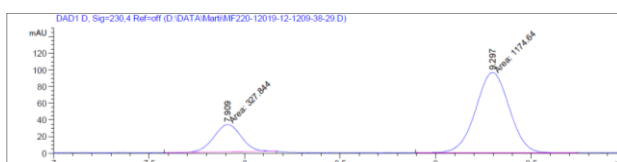

Signal 3: DAD1 D, Sig=230,4 Ref=off

| Peak # | RetTime [min] | Type | Width [min] | Area [mAU*s] | Height [mAU] | Area %  |
|--------|---------------|------|-------------|--------------|--------------|---------|
| 1      | 7.909         | MM   | 0.1670      | 327.84363    | 32.72367     | 21.8200 |
| 2      | 9.297         | MM   | 0.2036      | 1174.64441   | 96.14930     | 78.1800 |

Totals : 1502.48804 128.87297

### tert-Butyl (R)-4-phenyl-2-oxopyrrolidine-1-carboxylate (4ab) [9]

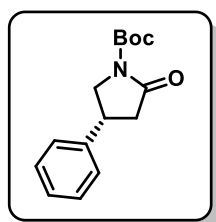

Following General Procedure (i). Colorless oil.

27.0 mg, 0.102 mmol, 34% yield, 80:20 *er*.

The enantiomeric ratio was determined by SFC analysis in comparison to a racemic material using Daicel Chiralpak® IC column (4.6 mm × 250 mm) at 30 °C and 10% MeOH in supercritical CO<sub>2</sub> (3.0 mL min<sup>-1</sup>) as mobile phase, λ = 210 nm (*t<sub>r</sub>* = 5.2 min (minor), 6.2 min (major)).

<sup>1</sup>H NMR (400 MHz, CDCl<sub>3</sub>) δ 7.40 – 7.36 (m, 2H), 7.33 – 7.24 (m, 3H), 4.16 (dd, *J* = 10.8, 8.1 Hz, 1H), 3.69 (dd, *J* = 10.8, 8.5 Hz, 1H), 3.53 (quint, *J* = 8.0 Hz, 1H), 2.89 (dd, *J* = 17.3, 8.5 Hz, 1H), 2.71 (dd, *J* = 17.3, 9.9 Hz, 1H), 1.53 (s, 9H).

<sup>13</sup>C NMR (101 MHz, CDCl<sub>3</sub>) δ 173.1, 150.0, 140.7, 129.1, 127.5, 126.9, 83.2, 53.2, 40.4, 36.5, 28.1.

HRMS (ESI+) *m/z* calculated for C<sub>15</sub>H<sub>19</sub>NO<sub>3</sub>+Na<sup>+</sup> [M+Na]<sup>+</sup> 284.12571, found 284.12505.

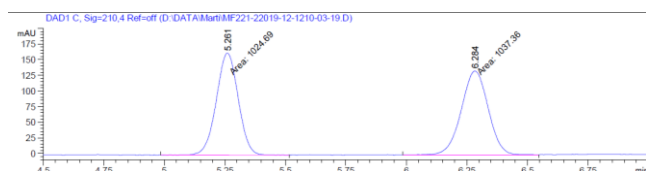

Signal 2: DAD1 C, Sig=210,4 Ref=off

| Peak # | RetTime [min] | Type | Width [min] | Area [mAU*s] | Height [mAU] | Area %  |
|--------|---------------|------|-------------|--------------|--------------|---------|
| 1      | 5.261         | MM   | 0.1048      | 1024.68652   | 162.98163    | 49.6926 |
| 2      | 6.284         | MM   | 0.1289      | 1037.36316   | 134.12086    | 50.3074 |

Totals : 2062.04968 297.10249

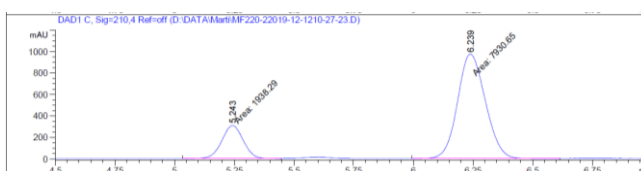

Signal 2: DAD1 C, Sig=210,4 Ref=off

| Peak # | RetTime [min] | Type | Width [min] | Area [mAU*s] | Height [mAU] | Area %  |
|--------|---------------|------|-------------|--------------|--------------|---------|
| 1      | 5.243         | MM   | 0.1048      | 1938.29065   | 308.36526    | 19.6403 |
| 2      | 6.239         | MM   | 0.1356      | 7930.64600   | 975.07837    | 80.3597 |

Totals : 9868.93665 1283.44363

### tert-Butyl (R)-2-oxo-4-(4-(trifluoromethyl)phenyl)pyrrolidine-1-carboxylate (4ac) [9]

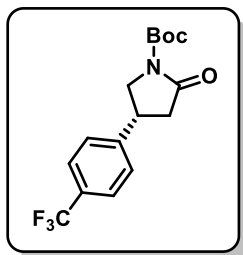

Following General procedure (i). Clear yellow oil.

26.6 mg, 0.081 mmol, 27% yield, 80:20 *er*.

The enantiomeric ratio was determined by SFC analysis in comparison to a racemic material using Daicel Chiralpak® IC column (4.6 mm × 250 mm) at 30 °C and 10% MeOH in supercritical CO<sub>2</sub> (3.0 mL min<sup>-1</sup>) as mobile phase, λ = 210 nm (*t<sub>r</sub>* = 3.0 min (minor), 3.5 min (major)).

**<sup>1</sup>H NMR (400 MHz, CDCl<sub>3</sub>)** δ 7.62 (d, *J* = 8.2 Hz, 2H), 7.36 (d, *J* = 8.2 Hz, 2H), 4.19 (dd, *J* = 10.7, 8.0 Hz, 1H), 3.70 (dd, *J* = 10.8, 8.2 Hz, 1H), 3.60 (quint, *J* = 8.0 Hz, 1H), 2.94 (dd, *J* = 17.3, 8.4 Hz, 1H), 2.71 (dd, *J* = 17.3, 9.5 Hz, 1H), 1.53 (s, 9H).

**<sup>13</sup>C NMR (101 MHz, CDCl<sub>3</sub>)** δ 172.5, 149.9, 144.8, 130.47, 130.0 (q, *J* = 32.3 Hz), 127.3, 126.1 (q, *J* = 4.0 Hz), 124.0 (q, *J* = 273.7 Hz), 83.5, 52.8, 40.2, 36.3, 28.1.

**HRMS (ESI+)** *m/z* calculated for C<sub>16</sub>H<sub>18</sub>F<sub>3</sub>NO<sub>3</sub>+Na<sup>+</sup> [M+Na]<sup>+</sup> 352.11310, found 352.11236.

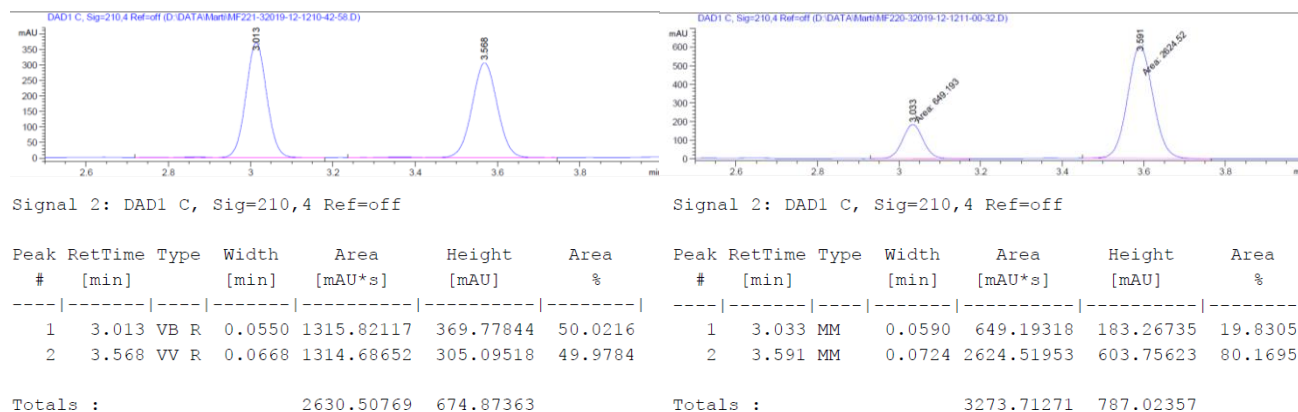

#### (*R*)-4-(4-Methoxyphenyl)-1-tosylpyrrolidin-2-one (4ba)

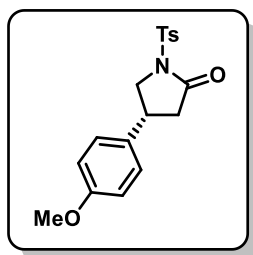

Following General Procedure (i). Pale yellow sticky solid.

**Run 1:** (88.6 mg, 0.255 mmol, 85% yield). **Run 2:** (88.0 mg, 0.255 mmol, 85% yield).

**Average: 85% yield**

The enantiomeric ratio was determined by HPLC analysis in comparison to a racemic material using Daicel Chiralpak® IC column (4.6 mm × 250 mm) at 30 °C and 60:40 hexanes:iPrOH (1.3 mL min<sup>-1</sup>) as mobile phase, λ = 225 nm (*t<sub>r</sub>* = 40.1 min (major), 51.2 min (minor)).

**<sup>1</sup>H NMR (500 MHz, CDCl<sub>3</sub>)** δ 7.93 (d, *J* = 8.3 Hz, 2H), 7.34 (d, *J* = 8.1 Hz, 2H), 7.05 (d, *J* = 8.6 Hz, 2H), 6.84 (d, *J* = 8.6 Hz, 2H), 4.29 (dd, *J* = 9.8, 8.0 Hz, 1H), 3.79 (s, 3H), 3.74 (dd, *J* = 9.8, 8.2 Hz, 1H), 3.55 (quint, *J* = 8.3 Hz, 1H), 2.80 (dd, *J* = 17.3, 8.4 Hz, 1H), 2.57 (dd, *J* = 17.3, 9.4 Hz, 1H), 2.45 (s, 3H).

**<sup>13</sup>C NMR (126 MHz, CDCl<sub>3</sub>)** δ 172.3, 159.1, 145.4, 135.8, 131.3, 129.9, 128.2, 127.8, 114.5, 55.5, 54.0, 39.9, 36.7, 21.8.

[α]<sub>D</sub><sup>20</sup> = -19 (c 0.98, CHCl<sub>3</sub>, 84:16 er)

**HRMS (ESI+)** *m/z* calculated for C<sub>18</sub>H<sub>19</sub>NO<sub>4</sub>S+H<sup>+</sup> [M+H]<sup>+</sup> 346.11076, found 346.11031.

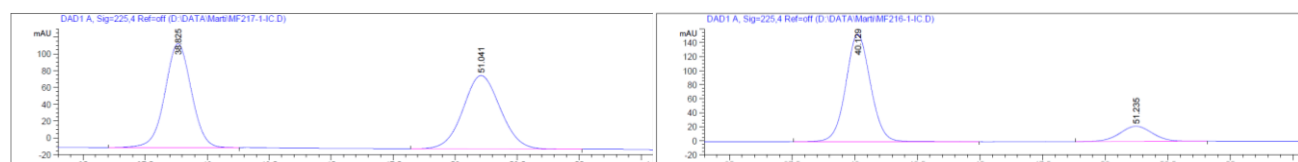

Signal 1: DAD1 A, Sig=225,4 Ref=off

| Peak # | RetTime [min] | Type | Width [min] | Area [mAU*s] | Height [mAU] | Area %  |
|--------|---------------|------|-------------|--------------|--------------|---------|
| 1      | 38.825        | BB   | 1.1342      | 9156.52148   | 123.61306    | 49.9561 |
| 2      | 51.041        | BB   | 1.5869      | 9172.61328   | 87.36315     | 50.0439 |

Totals : 1.83291e4 210.97621

Signal 1: DAD1 A, Sig=225,4 Ref=off

| Peak # | RetTime [min] | Type | Width [min] | Area [mAU*s] | Height [mAU] | Area %  |
|--------|---------------|------|-------------|--------------|--------------|---------|
| 1      | 40.129        | BB   | 1.0507      | 1.05005e4    | 153.37325    | 84.3914 |
| 2      | 51.235        | BB   | 1.1936      | 1942.12158   | 21.58761     | 15.6086 |

Totals : 1.24426e4 174.96085

**(R)-4-Phenyl-1-tosylpyrrolidin-2-one (4bb)**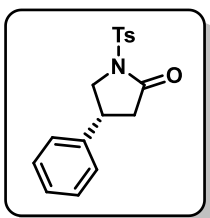

Following General Procedure (i). Colorless oil.

**Run 1:** (67.1 mg, 0.213 mmol, 71% yield). **Run 2:** (69.3 mg, 0.219 mmol, 73% yield).**Average: 72% yield.**

The enantiomeric ratio was determined by HPLC analysis in comparison to a racemic material using Daicel Chiralpak® IC column (4.6 mm × 250 mm) at 30 °C and 60:40

hexanes:iPrOH (1.3 mL min<sup>-1</sup>) as mobile phase, λ = 225 nm (*t<sub>r</sub>* = 24.3 min (major), 37.9 min (minor)).

**<sup>1</sup>H NMR (500 MHz, CDCl<sub>3</sub>)** δ 7.93 (d, *J* = 8.2 Hz, 2H), 7.38 – 7.26 (m, 5H), 7.14 (d, *J* = 7.1 Hz, 2H), 4.33 (dd, *J* = 9.8, 8.1 Hz, 1H), 3.79 (dd, *J* = 9.8, 8.1 Hz, 1H), 3.60 (quint, *J* = 8.3 Hz, 1H), 2.84 (dd, *J* = 17.3, 8.4 Hz, 1H), 2.61 (dd, *J* = 17.3, 9.3 Hz, 1H), 2.45 (s, 3H).

**<sup>13</sup>C NMR (126 MHz, CDCl<sub>3</sub>)** δ 172.2, 145.4, 139.9, 135.2, 129.9, 129.2, 128.2, 127.8, 126.7, 53.8, 39.6, 37.3, 21.8.

**[α]<sub>D</sub><sup>20</sup>** = -12 (c 1.05, CHCl<sub>3</sub>, 79:21 *er*)**HRMS (ESI+)** *m/z* calculated for C<sub>17</sub>H<sub>17</sub>NO<sub>3</sub>S+Na<sup>+</sup> [M+Na]<sup>+</sup> 338.08214, found 338.08137.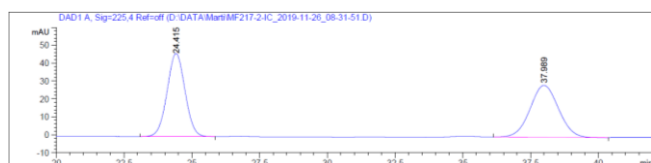

Signal 1: DAD1 A, Sig=225,4 Ref=off

| Peak # | RetTime [min] | Type | Width [min] | Area [mAU*s] | Height [mAU] | Area %  |
|--------|---------------|------|-------------|--------------|--------------|---------|
| 1      | 24.415        | BB   | 0.7101      | 2134.50488   | 46.45018     | 50.1794 |
| 2      | 37.989        | BB   | 1.0867      | 2119.23975   | 28.99480     | 49.8206 |

Totals : 4253.74463 75.44498

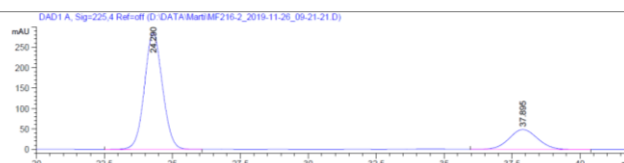

Signal 1: DAD1 A, Sig=225,4 Ref=off

| Peak # | RetTime [min] | Type | Width [min] | Area [mAU*s] | Height [mAU] | Area %  |
|--------|---------------|------|-------------|--------------|--------------|---------|
| 1      | 24.290        | BB   | 0.7149      | 1.31630e4    | 284.98715    | 78.6391 |
| 2      | 37.895        | BB   | 1.0946      | 3575.48438   | 48.81356     | 21.3609 |

Totals : 1.67384e4 333.80071

**(R)-1-Tosyl-4-(4-(trifluoromethyl)phenyl)pyrrolidin-2-one (4bc)**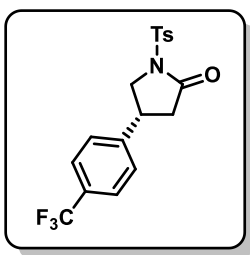

Following General Procedure (i). Yellow oil.

**Run 1:** (71.6 mg, 0.186 mmol, 62% yield). **Run 2:** (76.3 mg, 0.198 mmol, 66% yield).**Average: 64% yield.**The enantiomeric ratio was determined by HPLC analysis in comparison to a racemic material using Daicel Chiralpak® IC column (4.6 mm × 250 mm) at 30 °C and 60:40 hexanes:iPrOH (1.3 mL min<sup>-1</sup>) as mobile phase, λ = 225 nm (*t<sub>r</sub>* = 15.8 min (major), 20.5

min (minor)).

**<sup>1</sup>H NMR (400 MHz, CDCl<sub>3</sub>)** δ 7.92 (d, *J* = 8.3 Hz, 2H), 7.56 (d, *J* = 8.1 Hz, 2H), 7.34 (d, *J* = 8.1 Hz, 2H), 7.26 (d, *J* = 8.1 Hz, 2H), 4.35 (dd, *J* = 10.0, 7.8 Hz, 1H), 3.80 (dd, *J* = 10.0, 7.4 Hz, 1H), 3.66 (quint, *J* = 8.3 Hz, 1H), 2.89 (dd, *J* = 17.3, 8.4 Hz, 1H), 2.60 (dd, *J* = 17.3, 8.6 Hz, 1H), 2.46 (s, 3H).

**<sup>13</sup>C NMR (101 MHz, CDCl<sub>3</sub>)** δ 171.6, 145.6, 144.2, 135.1, 129.9, 128.2, 127.1, 126.7 (q, *J* = 272.7 Hz) 126.2 (q, *J* = 3.7 Hz), 53.4, 39.4, 37.0, 21.8.

**[α]<sub>D</sub><sup>20</sup>** = -14 (c 0.97, CHCl<sub>3</sub>, 85:15 *er*)

**HRMS (ESI+)** *m/z* calculated for C<sub>18</sub>H<sub>16</sub>F<sub>3</sub>NO<sub>3</sub>S+H<sup>+</sup> [M+H]<sup>+</sup> 384.08758, found 384.08681.

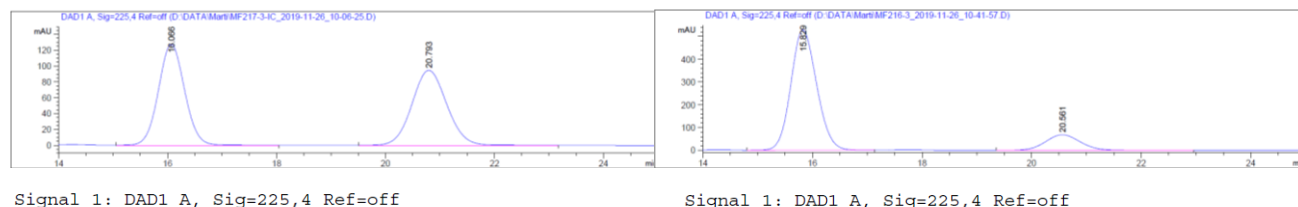

| Peak #   | RetTime [min] | Type | Width [min] | Area [mAU*s] | Height [mAU] | Area %  | Peak #   | RetTime [min] | Type | Width [min] | Area [mAU*s] | Height [mAU] | Area %  |
|----------|---------------|------|-------------|--------------|--------------|---------|----------|---------------|------|-------------|--------------|--------------|---------|
| 1        | 16.066        | BB   | 0.5168      | 4255.62500   | 127.70363    | 50.2258 | 1        | 15.829        | BB   | 0.5066      | 1.72516e4    | 528.83960    | 84.9903 |
| 2        | 20.793        | BB   | 0.6891      | 4217.36084   | 94.79144     | 49.7742 | 2        | 20.561        | BB   | 0.6892      | 3046.71436   | 68.46552     | 15.0097 |
| Totals : |               |      |             | 8472.98584   | 222.49506    |         | Totals : |               |      |             | 2.02983e4    | 597.30511    |         |

#### (*R*)-Methyl 4-(5-oxo-1-tosylpyrrolidin-3-yl)benzoate (4bd)

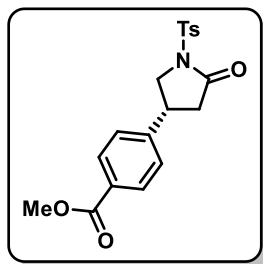

Following General Procedure (i). Yellow solid.

**Run 1:** (86.5 mg, 0.231 mmol, 77% yield). **Run 2:** (84.6 mg, 0.226 mmol, 75% yield).

**Average:** 76% yield.

The enantiomeric ratio was determined by HPLC analysis in comparison to a racemic material using Daicel Chiralpak® IB column (4.6 mm × 250 mm) at 30 °C and 80:20 hexanes:iPrOH (1.3 mL min<sup>-1</sup>) as mobile phase, λ = 225 nm (*t<sub>r</sub>* = 23.3 min (minor), 25.1 min (major)).

**<sup>1</sup>H NMR (400 MHz, CDCl<sub>3</sub>)** δ 7.95 (d, *J* = 8.4 Hz, 2H), 7.90 (d, *J* = 8.3 Hz, 2H), 7.32 (d, *J* = 8.1 Hz, 2H), 7.19 (d, *J* = 8.3 Hz, 2H), 4.33 (dd, *J* = 10.0, 7.8 Hz, 1H), 3.89 (s, 3H), 3.78 (dd, *J* = 10.0, 7.6 Hz, 1H), 3.69 – 3.59 (m, 1H), 2.86 (dd, *J* = 17.3, 8.4 Hz, 1H), 2.59 (dd, *J* = 17.3, 8.8 Hz, 1H), 2.43 (s, 3H).

**<sup>13</sup>C NMR (101 MHz, CDCl<sub>3</sub>)** δ 171.8, 166.6, 145.5, 145.2, 135.0, 130.4, 129.8, 129.6, 128.1, 126.7, 53.3, 52.3, 39.3, 37.1, 21.7.

**[α]<sub>D</sub><sup>20</sup>** = -18 (c 1.00, CHCl<sub>3</sub>, 87:13 *er*)

**HRMS (ESI+)** *m/z* calculated for C<sub>19</sub>H<sub>19</sub>NO<sub>5</sub>S+H<sup>+</sup> [M+H]<sup>+</sup> 374.10567, found 374.10530.

**HRMS (ESI+)** *m/z* calculated for C<sub>19</sub>H<sub>19</sub>NO<sub>5</sub>S+Na<sup>+</sup> [M+Na]<sup>+</sup> 396.08761, found 396.0873.

mp: 105–107°C.

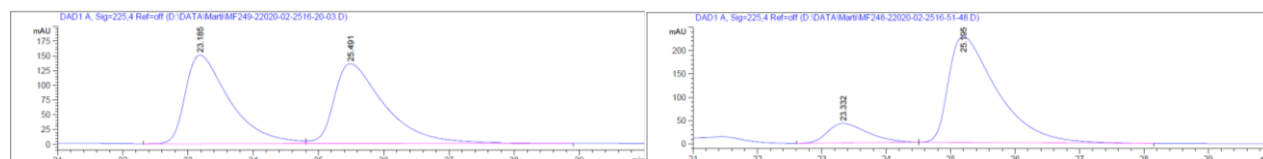



Signal 1: DAD1 A, Sig=225,4 Ref=off

| Peak # | RetTime [min] | Type | Width [min] | Area [mAU*s] | Height [mAU] | Area %  |
|--------|---------------|------|-------------|--------------|--------------|---------|
| 1      | 23.185        | BV   | 0.7013      | 7113.47754   | 150.52448    | 49.3431 |
| 2      | 25.491        | VB   | 0.7939      | 7302.87891   | 135.69852    | 50.6569 |

Totals : 1.44164e4 286.22299

Signal 1: DAD1 A, Sig=225,4 Ref=off

| Peak # | RetTime [min] | Type | Width [min] | Area [mAU*s] | Height [mAU] | Area %  |
|--------|---------------|------|-------------|--------------|--------------|---------|
| 1      | 23.332        | BB   | 0.6532      | 1793.75281   | 41.58822     | 13.1407 |
| 2      | 25.195        | BBA  | 0.7715      | 1.18566e4    | 226.97035    | 86.8593 |

Totals : 1.36504e4 268.55857

**(R)-4-(4-Acetylphenyl)-1-tosylpyrrolidin-2-one (4be)**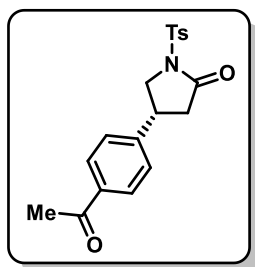

Following General Procedure (i). Yellow oily solid.

**Run 1:** (78.1 mg, 0.216 mmol, 72% yield). **Run 2:** (75.9 mg, 0.212 mmol, 70% yield).**Average: 71% yield.**

The enantiomeric ratio was determined by HPLC analysis in comparison to a racemic material using Daicel Chiralpak® IB column (4.6 mm × 250 mm) at 30 °C and 70:30 hexanes:iPrOH (1.3 mL min<sup>-1</sup>) as mobile phase, λ = 225 nm (*t<sub>r</sub>* = 21.5 min (minor), 24.5 min (major)).

**<sup>1</sup>H NMR (400 MHz, CDCl<sub>3</sub>)** δ 7.93 - 7.86 (m, 4H), 7.33 (d, *J* = 8.1 Hz, 2H), 7.23 (d, *J* = 8.3 Hz, 2H), 4.33 (dd, *J* = 10.0, 7.9 Hz, 1H), 3.80 (dd, *J* = 10.0, 7.6 Hz, 1H), 3.66 (quint, *J* = 8.2 Hz, 1H), 2.86 (dd, *J* = 17.3, 8.5 Hz, 1H), 2.60 (m, 1H), 2.57 (s, 3H), 2.44 (s, 3H).

**<sup>13</sup>C NMR (101 MHz, CDCl<sub>3</sub>)** δ 197.5, 171.7, 145.6, 145.4, 136.5, 135.0, 129.9, 129.2, 128.2, 126.9, 53.3, 39.3, 37.1, 26.7, 21.8.

[α]<sub>D</sub><sup>20</sup> = -33 (c 1.02, CHCl<sub>3</sub>, 87:13 *er*)**HRMS (ESI+)** *m/z* calculated for C<sub>19</sub>H<sub>19</sub>NO<sub>4</sub>S+H<sup>+</sup> [M+H]<sup>+</sup> 358.11076, found 358.11035.**mp:** 94-96°C.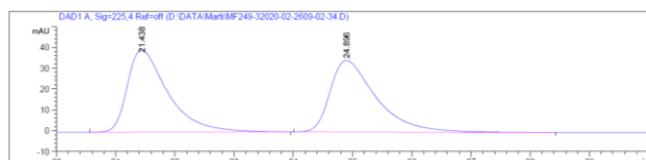

Signal 1: DAD1 A, Sig=225,4 Ref=off

| Peak # | RetTime [min] | Type | Width [min] | Area [mAU*s] | Height [mAU] | Area %  |
|--------|---------------|------|-------------|--------------|--------------|---------|
| 1      | 21.438        | BB   | 0.7080      | 1873.16040   | 39.44936     | 50.1703 |
| 2      | 24.896        | BB   | 0.7972      | 1860.44543   | 34.27748     | 49.8297 |

Totals : 3733.60583 73.72684

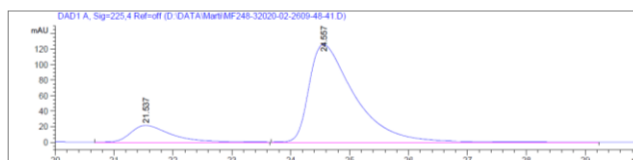

Signal 1: DAD1 A, Sig=225,4 Ref=off

| Peak # | RetTime [min] | Type | Width [min] | Area [mAU*s] | Height [mAU] | Area %  |
|--------|---------------|------|-------------|--------------|--------------|---------|
| 1      | 21.537        | BB   | 0.6967      | 1018.51294   | 21.50101     | 13.1215 |
| 2      | 24.557        | BB   | 0.7952      | 6743.64111   | 125.83127    | 86.8785 |

Totals : 7762.15405 147.33228

**(R)-1-Tosyl-4-(4-fluorophenyl)pyrrolidin-2-one (4bf)**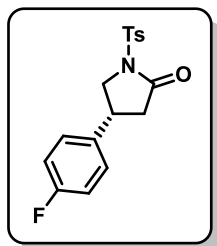

Following General Procedure (i). Colorless solid.

**Run 1:** (76.5 mg, 0.228 mmol, 76% yield). **Run 2:** (76.1 mg, 0.212 mmol, 76% yield).**Average: 76% yield.**

The enantiomeric ratio was determined by HPLC analysis in comparison to a racemic material using Daicel Chiralpak® IC column (4.6 mm × 250 mm) at 30 °C and 50:50

hexanes:iPrOH (1.3 mL min<sup>-1</sup>) as mobile phase,  $\lambda$  = 230 nm ( $t_r$  = 14.8 min (major), 19.6 min (minor)).

**<sup>1</sup>H NMR (400 MHz, CDCl<sub>3</sub>)**  $\delta$  7.91 (d,  $J$  = 8.3 Hz, 2H), 7.34 (d,  $J$  = 8.1 Hz, 2H), 7.14 – 7.06 (m, 2H), 7.02 – 6.95 (m, 2H), 4.30 (dd,  $J$  = 9.9, 7.8 Hz, 1H), 3.74 (dd,  $J$  = 9.9, 7.7 Hz, 1H), 3.58 (quint,  $J$  = 8.2 Hz, 1H), 2.83 (dd,  $J$  = 17.3, 8.4 Hz, 1H), 2.55 (dd,  $J$  = 17.3, 9.0 Hz, 1H), 2.45 (s, 3H).

**<sup>13</sup>C NMR (101 MHz, CDCl<sub>3</sub>)**  $\delta$  171.9, 162.1 (d,  $J$  = 247.4 Hz), 145.5, 135.7 (d,  $J$  = 3.0 Hz), 135.1, 129.8, 128.3 (d,  $J$  = 8.0 Hz), 128.2, 116.0 (d,  $J$  = 21.2 Hz), 53.8, 39.7, 36.6, 21.8.

**<sup>19</sup>F NMR (235 MHz, CDCl<sub>3</sub>)**  $\delta$  114.45.

**[ $\alpha$ ]<sup>20</sup><sub>D</sub>** = -17 (c 1.01, CHCl<sub>3</sub>, 86:14 er)

**HRMS (ESI+)**  $m/z$  calculated for C<sub>17</sub>H<sub>16</sub>FNO<sub>3</sub>S+H<sup>+</sup> [M+H]<sup>+</sup> 334.09077, found 334.09050.

**HRMS (ESI+)**  $m/z$  calculated for C<sub>17</sub>H<sub>16</sub>FNO<sub>3</sub>S +Na<sup>+</sup> [M+Na]<sup>+</sup> 356.07271, found 356.07220.

**mp:** 120-121°C.

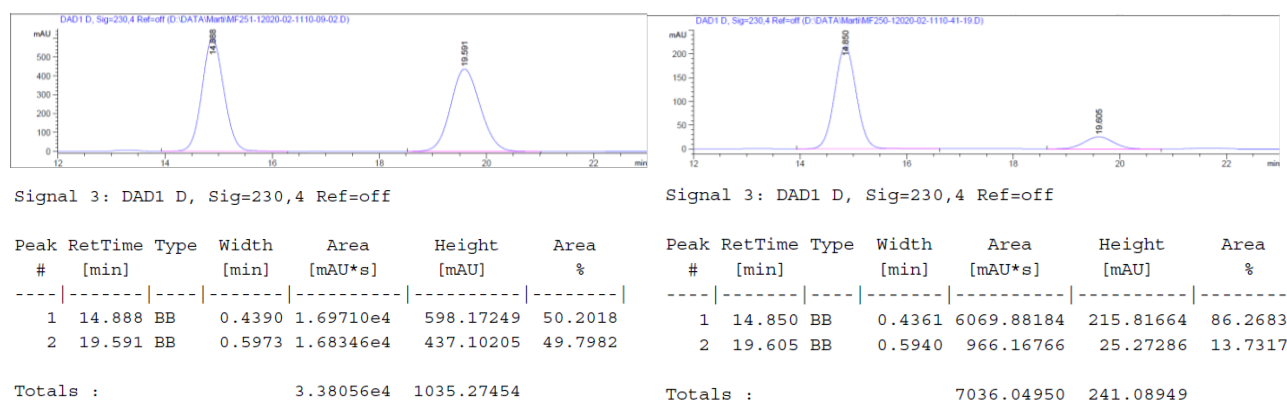

### (R)-1-Tosyl-4-(4-chlorophenyl)pyrrolidin-2-one (4bg)

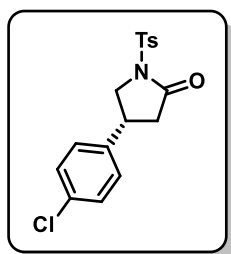

Following General Procedure (i). Clear-yellow gum.

**Run 1:** (72.0 mg, 0.204 mmol, 68% yield). **Run 2:** (76.5 mg, 0.219 mmol, 73% yield).

**Average: 70% yield.**

The enantiomeric ratio was determined by HPLC analysis in comparison to a racemic material using Daicel Chiralpak® IC column (4.6 mm × 250 mm) at 30 °C and 50:50 hexanes:iPrOH (1.3 mL min<sup>-1</sup>) as mobile phase,  $\lambda$  = 225 nm ( $t_r$  = 23.8 min (major), 30.1 min (minor)).

**<sup>1</sup>H NMR (500 MHz, CDCl<sub>3</sub>)**  $\delta$  7.83 (d,  $J$  = 8.3 Hz, 2H), 7.26 (d,  $J$  = 8.1 Hz, 2H), 7.19 (d,  $J$  = 8.4 Hz, 2H), 6.99 (d,  $J$  = 8.4 Hz, 2H), 4.23 (dd,  $J$  = 9.9, 7.9 Hz, 1H), 3.67 (dd,  $J$  = 9.9, 7.7 Hz, 1H), 3.50 (quint,  $J$  = 8.1 Hz, 1H), 2.76 (dd,  $J$  = 17.3, 8.4 Hz, 1H), 2.48 (dd,  $J$  = 17.3, 8.9 Hz, 1H), 2.38 (s, 3H).

**<sup>13</sup>C NMR (126 MHz, CDCl<sub>3</sub>)**  $\delta$  171.9, 145.5, 138.5, 135.0, 133.5, 129.8, 129.3, 128.2, 128.0, 53.6, 39.5, 36.7, 21.8.

**[ $\alpha$ ]<sup>20</sup><sub>D</sub>** = -25 (c 1.05, CHCl<sub>3</sub>, 86:14 er)

**HRMS (ESI+)**  $m/z$  calculated for C<sub>17</sub>H<sub>16</sub>ClNO<sub>3</sub>S+Na<sup>+</sup> [M+Na]<sup>+</sup> 372.04316, found 372.04237.

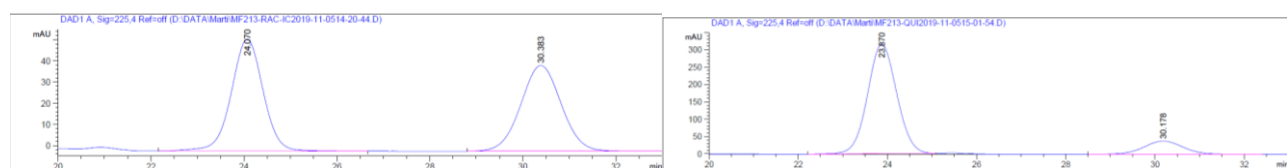

Signal 1: DAD1 A, Sig=225,4 Ref=off

| Peak # | RetTime [min] | Type | Width [min] | Area [mAU*s] | Height [mAU] | Area %  |
|--------|---------------|------|-------------|--------------|--------------|---------|
| 1      | 24.070        | BB   | 0.7278      | 2518.49512   | 52.86131     | 50.6226 |
| 2      | 30.383        | BB   | 0.9379      | 2456.54688   | 40.60169     | 49.3774 |

Totals : 4975.04199 93.46300

Signal 1: DAD1 A, Sig=225,4 Ref=off

| Peak # | RetTime [min] | Type | Width [min] | Area [mAU*s] | Height [mAU] | Area %  |
|--------|---------------|------|-------------|--------------|--------------|---------|
| 1      | 23.870        | BB   | 0.7032      | 1.42843e4    | 314.92059    | 86.2496 |
| 2      | 30.178        | BB   | 0.9262      | 2277.29248   | 37.83499     | 13.7504 |

Totals : 1.65616e4 352.75558

**(R)-1-Tosyl-4-(4-bromophenyl)pyrrolidin-2-one (4bh)**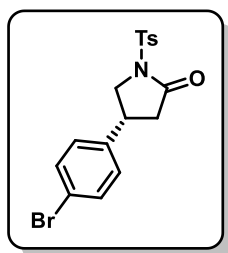

Following General Procedure (i). Yellow solid.

**Run 1:** (83.1 mg, 0.210 mmol, 70% yield). **Run 2:** (81.2 mg, 0.206 mmol, 68% yield).**Average: 69% yield.**

The enantiomeric ratio was determined by HPLC analysis in comparison to a racemic material using Daicel Chiralpak® IC column (4.6 mm × 250 mm) at 30 °C and 50:50 hexanes:iPrOH (1.3 mL min<sup>-1</sup>) as mobile phase, λ = 225 nm (*t<sub>r</sub>* = 20.5 min (major), 25.1 min (minor)).

**<sup>1</sup>H NMR (500 MHz, CDCl<sub>3</sub>)** δ 7.90 (d, *J* = 8.2 Hz, 2H), 7.41 (d, *J* = 8.3 Hz, 2H), 7.33 (d, *J* = 8.1 Hz, 2H), 7.00 (d, *J* = 8.3 Hz, 2H), 4.30 (dd, *J* = 9.8, 8.0 Hz, 1H), 3.74 (dd, *J* = 9.9, 7.7 Hz, 1H), 3.55 (quint, *J* = 8.1 Hz, 1H), 2.83 (dd, *J* = 17.3, 8.4 Hz, 1H), 2.54 (dd, *J* = 17.3, 8.9 Hz, 1H), 2.45 (s, 3H).

**<sup>13</sup>C NMR (126 MHz, CDCl<sub>3</sub>)** δ 171.8, 145.5, 139.1, 135.0, 132.2, 129.8, 128.4, 128.1, 121.6, 53.5, 39.4, 36.7, 21.8.

[α]<sub>D</sub><sup>20</sup> = -22 (c 0.91, CHCl<sub>3</sub>, 87:13 er)**HRMS (ESI+)** *m/z* calculated for C<sub>17</sub>H<sub>16</sub>BrNO<sub>3</sub>S+H<sup>+</sup> [M+H]<sup>+</sup> 394.01070, found 394.01033.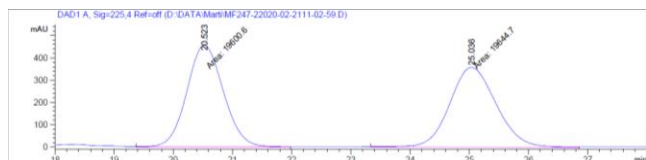

Signal 1: DAD1 A, Sig=225,4 Ref=off

| Peak # | RetTime [min] | Type | Width [min] | Area [mAU*s] | Height [mAU] | Area %  |
|--------|---------------|------|-------------|--------------|--------------|---------|
| 1      | 20.523        | MM   | 0.7155      | 1.96006e4    | 456.59232    | 49.9438 |
| 2      | 25.036        | MM   | 0.9153      | 1.96447e4    | 357.70822    | 50.0562 |

Totals : 3.92453e4 814.30054

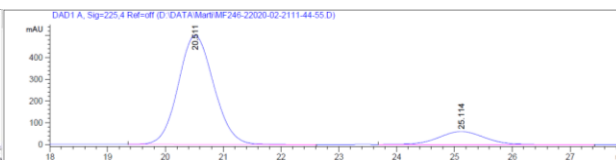

Signal 1: DAD1 A, Sig=225,4 Ref=off

| Peak # | RetTime [min] | Type | Width [min] | Area [mAU*s] | Height [mAU] | Area %  |
|--------|---------------|------|-------------|--------------|--------------|---------|
| 1      | 20.511        | BB   | 0.6635      | 2.12924e4    | 499.33578    | 86.8995 |
| 2      | 25.114        | BB   | 0.8367      | 3209.93311   | 59.56511     | 13.1005 |

Totals : 2.45023e4 558.90089

**(R)-1-Tosyl-4-(4-iodophenyl)pyrrolidin-2-one (4bi)**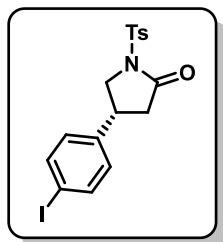

Following General Procedure (i). Clear-orange solid.

**Run 1:** (93.6 mg, 0.212 mmol, 70% yield). **Run 2:** (91.8 mg, 0.208 mmol, 69% yield).**Average: 70% yield.**

The enantiomeric ratio was determined by HPLC analysis in comparison to a racemic material using Daicel Chiralpak® IC column (4.6 mm × 250 mm) at 30 °C and 50:50 hexanes:iPrOH (1.3 mL min<sup>-1</sup>) as mobile phase, λ = 230 nm (*t<sub>r</sub>* = 19.7 min (major), 23.2 min (minor)).

**<sup>1</sup>H NMR (400 MHz, CDCl<sub>3</sub>)** δ 7.90 (d, *J* = 8.3 Hz, 2H), 7.61 (d, *J* = 8.4 Hz, 2H), 7.33 (d, *J* = 8.2 Hz, 2H), 6.87 (d, *J* = 8.3 Hz, 2H), 4.29 (dd, *J* = 10.0, 7.8 Hz, 1H), 3.73 (dd, *J* = 10.0, 7.6 Hz, 1H), 3.54 (quint, *J* = 8.1 Hz, 1H), 2.82 (dd, *J* = 17.3, 8.4 Hz, 1H), 2.54 (dd, *J* = 17.3, 8.8 Hz, 1H), 2.45 (s, 3H).

**<sup>13</sup>C NMR (101 MHz, CDCl<sub>3</sub>)** δ 171.8, 145.5, 139.7, 138.1, 135.0, 129.8, 128.6, 128.1, 92.9, 53.5, 39.3, 36.8, 21.8.

[α]<sub>D</sub><sup>20</sup> = -19 (c 0.98, CHCl<sub>3</sub>, 85:15 er)

**HRMS (ESI+)** *m/z* calculated for C<sub>17</sub>H<sub>16</sub>INO<sub>3</sub>S+H<sup>+</sup> [M+H]<sup>+</sup> 441.99683, found 441.99660.

**HRMS (ESI+)** *m/z* calculated for C<sub>17</sub>H<sub>16</sub>INO<sub>3</sub>S+Na<sup>+</sup> [M+Na]<sup>+</sup> 463.97878, found 463.97840.

mp: 121°C.

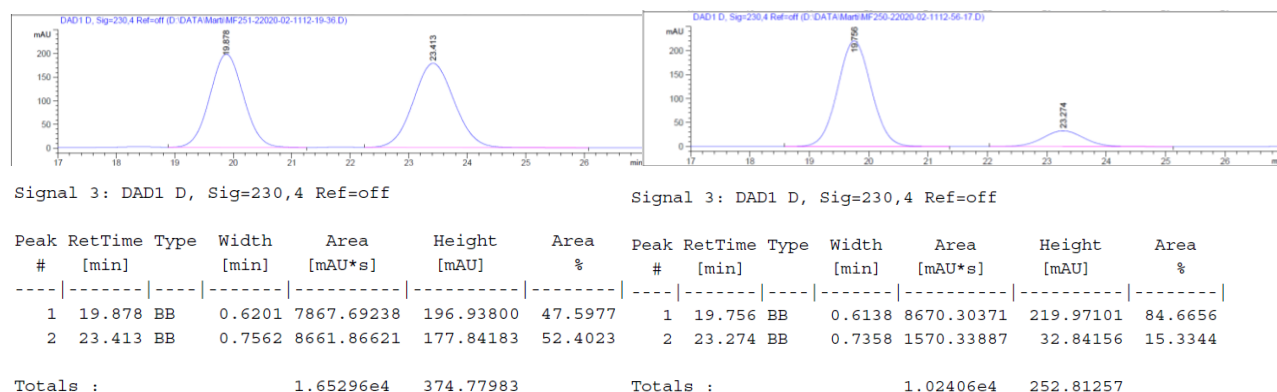

#### (*R*)-4-(*p*-Tolyl)-1-tosylpyrrolidin-2-one (4b)

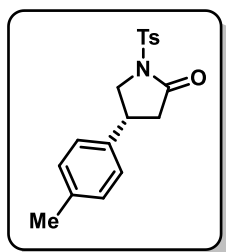

Following General Procedure (i). Colorless solid.

**Run 1:** (78.6 mg, 0.238 mmol, 79% yield). **Run 2:** (77.8 mg, 0.236 mmol, 79% yield).

**Average: 79% yield.**

The enantiomeric ratio was determined by HPLC analysis in comparison to a racemic material using Daicel Chiralpak<sup>®</sup> IC column (4.6 mm × 250 mm) at 30 °C and 50:50 hexanes:iPrOH (1.3 mL min<sup>-1</sup>) as mobile phase, λ = 230 nm (*t<sub>r</sub>* = 15.4 min (major), 21.2 min (minor)).

**<sup>1</sup>H NMR (400 MHz, CDCl<sub>3</sub>)** δ 7.93 (d, *J* = 8.4 Hz, 2H), 7.34 (d, *J* = 8.1 Hz, 2H), 7.12 (d, *J* = 7.9 Hz, 2H), 7.02 (d, *J* = 8.1 Hz, 2H), 4.30 (dd, *J* = 9.9, 7.9 Hz, 1H), 3.76 (dd, *J* = 9.9, 8.0 Hz, 1H), 3.55 (quint, *J* = 8.0 Hz, 1H), 2.81 (dd, *J* = 17.3, 8.4 Hz, 1H), 2.58 (dd, *J* = 17.3, 9.4 Hz, 1H), 2.45 (s, 3H), 2.32 (s, 3H).

**<sup>13</sup>C NMR (101 MHz, CDCl<sub>3</sub>)** δ 172.3, 145.3, 137.4, 136.9, 135.2, 129.8, 129.7, 128.2, 126.5, 53.9, 39.7, 36.9, 21.8, 21.1.

[α]<sub>D</sub><sup>20</sup> = -19 (c 1.07, CHCl<sub>3</sub>, 86:14 er)

**HRMS (ESI+)** *m/z* calculated for C<sub>18</sub>H<sub>19</sub>NO<sub>3</sub>S+H<sup>+</sup> [M+H]<sup>+</sup> 330.11584, found 330.11540.

**HRMS (ESI+)** *m/z* calculated for C<sub>18</sub>H<sub>19</sub>NO<sub>3</sub>S+Na<sup>+</sup> [M+Na]<sup>+</sup> 352.09779, found 352.09710.

mp: 93-95°C.

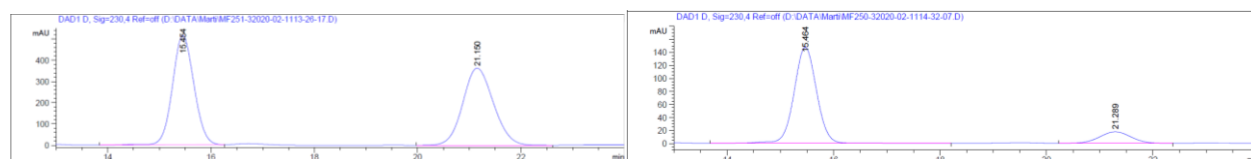

Signal 3: DAD1 D, Sig=230,4 Ref=off

| Peak # | RetTime [min] | Type | Width [min] | Area [mAU*s] | Height [mAU] | Area %  |
|--------|---------------|------|-------------|--------------|--------------|---------|
| 1      | 15.454        | BB   | 0.4496      | 1.48681e4    | 513.81287    | 49.9642 |
| 2      | 21.150        | BB   | 0.6373      | 1.48894e4    | 362.45013    | 50.0358 |

Totals : 2.97575e4 876.26300

Signal 3: DAD1 D, Sig=230,4 Ref=off

| Peak # | RetTime [min] | Type | Width [min] | Area [mAU*s] | Height [mAU] | Area %  |
|--------|---------------|------|-------------|--------------|--------------|---------|
| 1      | 15.464        | BB   | 0.4571      | 4342.44385   | 147.65497    | 85.7960 |
| 2      | 21.289        | BB   | 0.6324      | 718.91461    | 17.45893     | 14.2040 |

Totals : 5061.35846 165.11390

**(R)-1-Tosyl-4-(4-nitrophenyl)pyrrolidin-2-one (4bk)**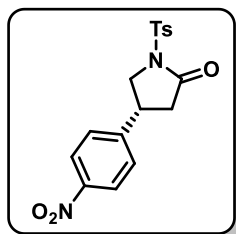

Following General Procedure (i). Yellow solid.

**Run 1:** (80.4 mg, 0.223 mmol, 74% yield). **Run 2:** (73.0 mg, 0.202 mmol, 67% yield).**Average: 70% yield.**

The enantiomeric ratio was determined by SFC analysis in comparison to a racemic material using Daicel Chiralpak® OJ-3 column (4.6 mm × 250 mm) at 30 °C and 10% MeOH in supercritical CO<sub>2</sub> (3.0 mL min<sup>-1</sup>) as mobile phase, λ = 225 nm (*t<sub>r</sub>* = 11.5 min (minor), 12.2 min (major)).

**<sup>1</sup>H NMR (400 MHz, CDCl<sub>3</sub>)** δ 8.17 (d, *J* = 8.7 Hz, 2H), 7.93 (d, *J* = 8.3 Hz, 2H), 7.34 (m, 4H), 4.37 (dd, *J* = 10.0, 7.7 Hz, 1H), 3.82 (dd, *J* = 10.0, 7.2 Hz, 1H), 3.72 (quint, *J* = 8.0, 1H), 2.92 (dd, *J* = 17.3, 8.4 Hz, 1H), 2.61 (dd, *J* = 17.3, 8.4 Hz, 1H), 2.46 (s, 3H).

**<sup>13</sup>C NMR (101 MHz, CDCl<sub>3</sub>)** δ 171.2, 147.5, 145.8, 134.9, 129.9, 128.3, 127.7, 124.4, 53.1, 39.3, 37.0, 21.8.

[α]<sub>D</sub><sup>20</sup> = -22 (c 1.05, CHCl<sub>3</sub>, 84:16 er)

**HRMS (ESI+)** *m/z* calculated for C<sub>17</sub>H<sub>16</sub>N<sub>2</sub>O<sub>5</sub>S+Na<sup>+</sup> [M+Na]<sup>+</sup> 383.06721, found 383.06609.

**mp: 157°C.**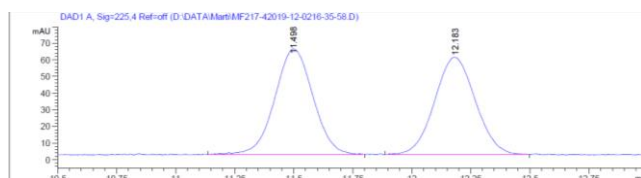

Signal 1: DAD1 A, Sig=225,4 Ref=off

| Peak # | RetTime [min] | Type | Width [min] | Area [mAU*s] | Height [mAU] | Area %  |
|--------|---------------|------|-------------|--------------|--------------|---------|
| 1      | 11.498        | VB R | 0.1570      | 711.54370    | 63.35781     | 50.3119 |
| 2      | 12.183        | VB R | 0.1590      | 702.72174    | 58.35484     | 49.6881 |

Totals : 1414.26544 121.71265

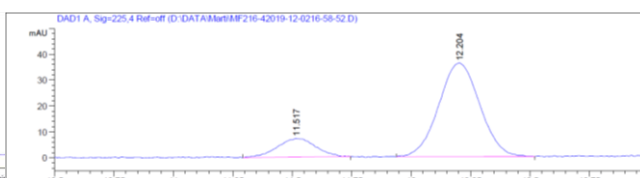

Signal 1: DAD1 A, Sig=225,4 Ref=off

| Peak # | RetTime [min] | Type | Width [min] | Area [mAU*s] | Height [mAU] | Area %  |
|--------|---------------|------|-------------|--------------|--------------|---------|
| 1      | 11.517        | BV R | 0.1336      | 81.22764     | 7.25734      | 15.7541 |
| 2      | 12.204        | BB   | 0.1434      | 434.37021    | 36.21155     | 84.2459 |

Totals : 515.59785 43.46889

**(R)-4-(2-Phenoxyphenyl)-1-tosylpyrrolidin-2-one (4bl)**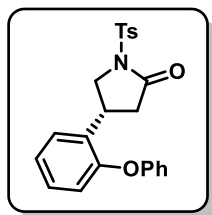

Following General Procedure (i). Colorless oil.

**Run 1:** (104.0 mg, 0.255 mmol, 85% yield). **Run 2:** (104.5 mg, 0.256 mmol, 67% yield).**Average: 85% yield.**

The enantiomeric ratio was determined by HPLC analysis in comparison to a racemic material using Daicel Chiralpak® IC column (4.6 mm × 250 mm) at 30 °C and 50:50 hexanes:iPrOH (1.3 mL min<sup>-1</sup>) as mobile phase, λ = 210 nm (*t<sub>r</sub>* = 23.5 min (minor), 41.9 min (major)).

**<sup>1</sup>H NMR (400 MHz, CDCl<sub>3</sub>)** δ 7.79 (d, *J* = 8.3 Hz, 2H), 7.30 – 7.21 (m, 2H), 7.21 – 7.17 (m, 2H), 7.16 – 7.02 (m, 3H), 6.97 (m, 1H), 6.83 – 6.74 (m, 3H), 4.22 (dd, *J* = 9.4, 7.8 Hz, 1H), 3.88 – 3.73 (m, 2H), 2.76 – 2.59 (m, 2H), 2.34 (s, 3H).

**<sup>13</sup>C NMR (101 MHz, CDCl<sub>3</sub>)** δ 172.5, 156.6, 155.0, 145.2, 135.2, 130.7, 130.1, 129.7, 128.9, 128.1, 127.8, 123.9, 123.8, 118.9, 118.6, 52.6, 38.4, 32.2, 21.8.

**[α]<sup>20</sup><sub>D</sub>** = -5 (c 1.00, CHCl<sub>3</sub>, 57:43 er)

**HRMS (ESI+)** *m/z* calculated for C<sub>23</sub>H<sub>21</sub>NO<sub>4</sub>S+H<sup>+</sup> [M+H]<sup>+</sup> 408.12641, found 408.12610.

**HRMS (ESI+)** *m/z* calculated for C<sub>23</sub>H<sub>21</sub>NO<sub>4</sub>S+Na<sup>+</sup> [M+Na]<sup>+</sup> 430.10835, found 430.10810.

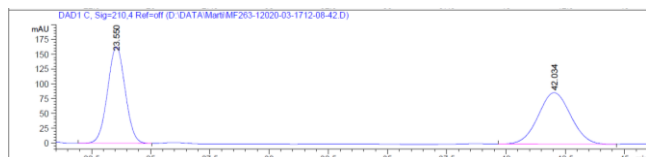

Signal 2: DAD1 C, Sig=210,4 Ref=off

| Peak # | RetTime [min] | Type | Width [min] | Area [mAU*s] | Height [mAU] | Area %  |
|--------|---------------|------|-------------|--------------|--------------|---------|
| 1      | 23.550        | BB   | 0.8052      | 8423.46582   | 162.91248    | 50.3651 |
| 2      | 42.034        | BB   | 1.4585      | 8301.33594   | 86.89524     | 49.6349 |

Totals : 1.67248e4 249.80772

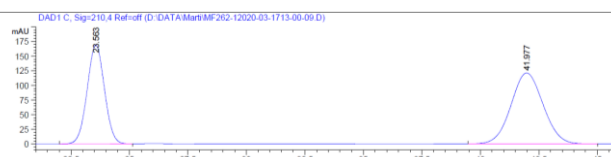

Signal 2: DAD1 C, Sig=210,4 Ref=off

| Peak # | RetTime [min] | Type | Width [min] | Area [mAU*s] | Height [mAU] | Area %  |
|--------|---------------|------|-------------|--------------|--------------|---------|
| 1      | 23.563        | BB   | 0.8051      | 8699.12402   | 168.84608    | 42.9603 |
| 2      | 41.977        | BB   | 1.4506      | 1.15501e4    | 121.11877    | 57.0397 |

Totals : 2.02492e4 289.96486

### (*R*)-1-Tosyl-4-(2-methoxyphenyl)pyrrolidin-2-one (4bm)

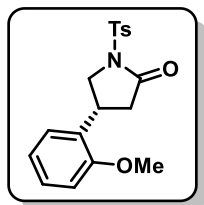

Following General Procedure (i). White solid.

**Run 1:** (83.3 mg, 0.240 mmol, 80% yield). **Run 2:** (88.9 mg, 0.257 mmol, 85% yield).

**Average: 82% yield.**

The enantiomeric ratio was determined by HPLC analysis in comparison to a racemic material using Daicel Chiralpak® IB column (4.6 mm × 250 mm) at 30 °C and 80:20 hexanes:iPrOH (1.0 mL min<sup>-1</sup>) as mobile phase, λ = 225 nm (*t<sub>r</sub>* = 13.5 min (major), 15.2 min (minor)).

**<sup>1</sup>H NMR (500 MHz, CDCl<sub>3</sub>)** δ 7.93 (d, *J* = 8.3 Hz, 2H), 7.33 (d, *J* = 8.1 Hz, 2H), 7.27 – 7.21 (m, 1H), 7.02 (d, *J* = 6.8 Hz, 1H), 6.88 – 6.85 (m, 2H), 4.29 (dd, *J* = 9.5, 8.4 Hz, 1H), 3.82 (dd, *J* = 9.7, 7.0 Hz, 1H), 3.75 (m, 1H), 3.67 (s, 3H), 2.77 (dd, *J* = 17.5, 9.1 Hz, 1H), 2.66 (dd, *J* = 17.5, 8.0 Hz, 1H), 2.44 (s, 3H).

**<sup>13</sup>C NMR (126 MHz, CDCl<sub>3</sub>)** δ 173.0, 157.2, 145.1, 135.4, 129.7, 128.8, 128.3, 128.2, 127.7, 120.7, 110.8, 55.1, 52.5, 37.9, 32.7, 21.7.

**[α]<sup>20</sup><sub>D</sub>** = -14 (c 1.02, CHCl<sub>3</sub>, 93:7 er)

**HRMS (ESI+)** *m/z* calculated for C<sub>18</sub>H<sub>19</sub>NO<sub>4</sub>S+H<sup>+</sup> [M+H]<sup>+</sup> 346,11076, found 346,11042.

**HRMS (ESI+)** *m/z* calculated for C<sub>18</sub>H<sub>19</sub>NO<sub>4</sub>S+Na<sup>+</sup> [M+Na]<sup>+</sup> 368,09270 found 368,09223.

**mp:** 140-143°C.

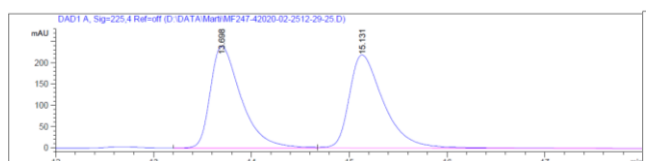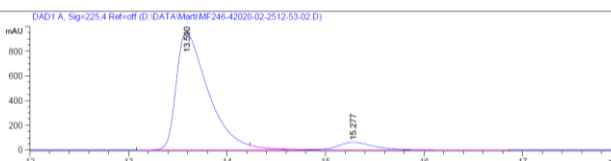

Signal 1: DAD1 A, Sig=225,4 Ref=off

| Peak # | RetTime [min] | Type | Width [min] | Area [mAU*s] | Height [mAU] | Area %  |
|--------|---------------|------|-------------|--------------|--------------|---------|
| 1      | 13.698        | BV   | 0.3297      | 5241.12891   | 239.17599    | 49.3111 |
| 2      | 15.131        | VBA  | 0.3690      | 5387.57666   | 219.00600    | 50.6889 |

Totals : 1.06287e4 458.18199

Signal 1: DAD1 A, Sig=225,4 Ref=off

| Peak # | RetTime [min] | Type | Width [min] | Area [mAU*s] | Height [mAU] | Area %  |
|--------|---------------|------|-------------|--------------|--------------|---------|
| 1      | 13.590        | BV R | 0.3410      | 2.15243e4    | 947.54419    | 92.7897 |
| 2      | 15.277        | VB E | 0.3972      | 1672.55273   | 62.30276     | 7.2103  |

Totals : 2.31969e4 1009.84695

**(R)-1-Tosyl-4-(2-nitrophenyl)pyrrolidin-2-one (4bn)**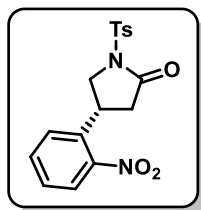

Following General Procedure (i). Yellow oil.

**Run 1:** (72.0 mg, 0.195 mmol, 65% yield). **Run 2:** (74.1 mg, 0.205 mmol, 68% yield).**Average: 66% yield.**

The enantiomeric ratio was determined by HPLC analysis in comparison to a racemic material using Daicel Chiralpak® IA column (4.6 mm × 250 mm) at 30 °C and 70:30

hexanes:iPrOH (1.3 mL min<sup>-1</sup>) as mobile phase, λ = 225 nm (*t<sub>r</sub>* = 9.9 min (minor), 11.8 min (major)).

**<sup>1</sup>H NMR (500 MHz, CDCl<sub>3</sub>)** δ 7.93 – 7.88 (m, 3H), 7.55 (m, 1H), 7.44 (m, 1H), 7.36 - 7.31 (m, 3H), 4.31 (dd, *J* = 10.4, 7.7 Hz, 1H), 4.05 (m, 1H), 3.98 (dd, *J* = 10.4, 5.0 Hz, 1H), 2.94 (dd, *J* = 17.8, 8.9 Hz, 1H), 2.63 (dd, *J* = 17.8, 5.9 Hz, 1H), 2.45 (s, 3H).

**<sup>13</sup>C NMR (126 MHz, CDCl<sub>3</sub>)** δ 171.7, 149.4, 145.6, 135.6, 134.9, 133.9, 129.9, 128.7, 128.2, 127.4, 125.2, 53.4, 39.3, 32.1, 21.8.

[α]<sub>D</sub><sup>20</sup> = +6 (c 1.02, CHCl<sub>3</sub>, 91:9 er)**HRMS (ESI+)** *m/z* calculated for C<sub>17</sub>H<sub>16</sub>N<sub>2</sub>O<sub>5</sub>S+H<sup>+</sup> [M+H]<sup>+</sup> 361.08527, found 361.08480.**HRMS (ESI+)** *m/z* calculated for C<sub>17</sub>H<sub>16</sub>N<sub>2</sub>O<sub>5</sub>S+Na<sup>+</sup> [M+Na]<sup>+</sup> 383.06721, found 383.06670.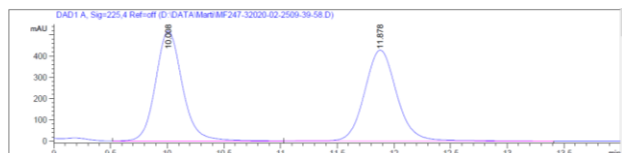

Signal 1: DAD1 A, Sig=225,4 Ref=off

| Peak # | RetTime [min] | Type | Width [min] | Area [mAU*s] | Height [mAU] | Area %  |
|--------|---------------|------|-------------|--------------|--------------|---------|
| 1      | 10.008        | BB   | 0.2506      | 8443.06543   | 516.84204    | 50.0662 |
| 2      | 11.878        | BB   | 0.3023      | 8420.74414   | 426.52744    | 49.9338 |

Totals : 1.68638e4 943.36948

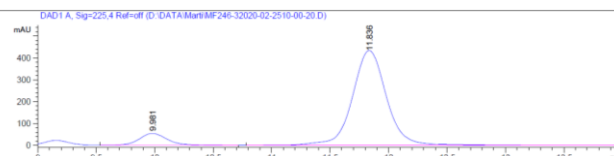

Signal 1: DAD1 A, Sig=225,4 Ref=off

| Peak # | RetTime [min] | Type | Width [min] | Area [mAU*s] | Height [mAU] | Area %  |
|--------|---------------|------|-------------|--------------|--------------|---------|
| 1      | 9.981         | BB   | 0.2481      | 879.83301    | 54.00305     | 9.0797  |
| 2      | 11.836        | BBA  | 0.3089      | 8810.26465   | 433.86591    | 90.9203 |

Totals : 9690.09766 487.86896

**(R)-1-Tosyl-4-(2-bromophenyl)pyrrolidin-2-one (4bo)**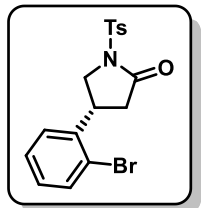

Following General Procedure (i). Orange gum.

**Run 1:** (82.7 mg, 0.210 mmol, 70% yield, 66:34 er). **Run 2:** (77.7 mg, 0.197 mmol, 65% yield). **Average: 67% yield.**

The enantiomeric ratio was determined by HPLC analysis in comparison to a racemic material using Daicel Chiralpak® IB column (4.6 mm × 250 mm) at 30 °C and 90:10

hexanes:iPrOH (1.0 mL min<sup>-1</sup>) as mobile phase, λ = 225 nm (*t<sub>r</sub>* = 24.5 min (major), 26.3 min (minor)).



**<sup>1</sup>H NMR (400 MHz, CDCl<sub>3</sub>)** δ 7.90 (d, *J* = 8.4 Hz, 2H), 7.57 (dd, *J* = 7.9, 1.3 Hz, 1H), 7.32 (d, *J* = 8.1 Hz, 2H), 7.22 (td, *J* = 7.5, 1.2 Hz, 1H), 7.16 – 7.07 (m, 2H), 4.30 (dd, *J* = 10.1, 7.6 Hz, 1H), 4.00 (quint, *J* = 8.0 Hz, 1H), 3.85 (dd, *J* = 10.1, 5.8 Hz, 1H), 2.88 (dd, *J* = 17.5, 8.7 Hz, 1H), 2.59 (dd, *J* = 17.5, 6.9 Hz, 1H), 2.44 (s, 3H).

**<sup>13</sup>C NMR (101 MHz, CDCl<sub>3</sub>)** δ 172.0, 145.4, 139.3, 135.1, 133.6, 129.8, 129.2, 128.2, 126.9, 124.4, 52.7, 38.6, 36.3, 21.8.

**[α]<sup>20</sup><sub>D</sub>** = -23 (c 1.00, CHCl<sub>3</sub>, 66:34 er)

**HRMS (ESI+)** *m/z* calculated for C<sub>17</sub>H<sub>16</sub>BrO<sub>3</sub>S+H<sup>+</sup> [M+H]<sup>+</sup> 394.01070, found 394.01050.

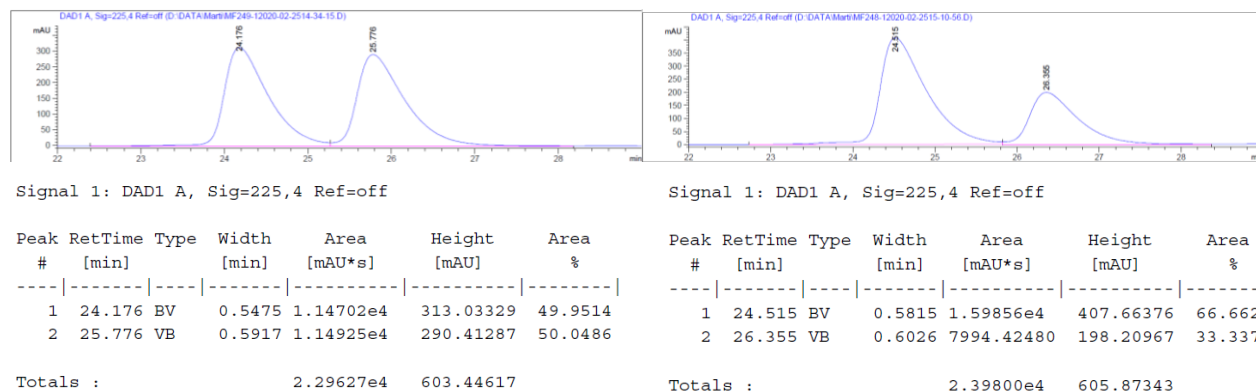

### (*R*)-1-Tosyl-4-(3-chlorophenyl)pyrrolidin-2-one (4bp)

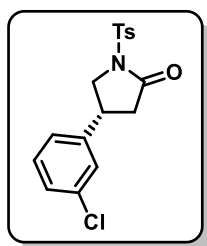

Following General Procedure (i). Yellowish solid.

**Run 1:** (74.3 mg, 0.212 mmol, 71% yield). **Run 2:** (72.5 mg, 0.207 mmol, 69% yield).

**Average: 70% yield.**

The enantiomeric ratio was determined by HPLC analysis in comparison to a racemic material using Daicel Chiralpak® IC column (4.6 mm × 250 mm) at 30 °C and 50:50 hexanes:iPrOH (1.3 mL min<sup>-1</sup>) as mobile phase, λ = 225 nm (*t<sub>r</sub>* = 27.5 min (major), 34.1 min (minor)).

**<sup>1</sup>H NMR (400 MHz, CDCl<sub>3</sub>)** δ 7.92 (d, *J* = 8.4 Hz, 2H), 7.34 (d, *J* = 8.0 Hz, 2H), 7.26 – 7.22 (m, 2H), 7.08 (m, 1H), 7.02 (m, 1H), 4.32 (dd, *J* = 10.0, 7.8 Hz, 1H), 3.76 (dd, *J* = 10.0, 7.5 Hz, 1H), 3.57 (m, 1H), 2.84 (dd, *J* = 17.3, 8.5 Hz, 1H), 2.56 (dd, *J* = 17.3, 8.8 Hz, 1H), 2.45 (s, 3H).

**<sup>13</sup>C NMR (101 MHz, CDCl<sub>3</sub>)** δ 171.7, 145.5, 142.2, 135.0, 135.0, 130.5, 129.9, 128.2, 127.9, 126.9, 124.9, 53.4, 39.4, 36.9, 21.8.

**[α]<sup>20</sup><sub>D</sub>** = -16 (c 1.10, CHCl<sub>3</sub>, 86:14 er)

**HRMS (ESI+)** *m/z* calculated for C<sub>17</sub>H<sub>16</sub>ClNO<sub>3</sub>S+H<sup>+</sup> [M+H]<sup>+</sup> 350.06122, found 350.06101.

**mp:** 127–128°C.

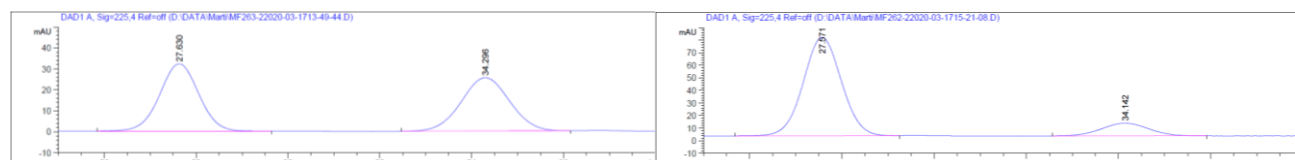



Signal 1: DAD1 A, Sig=225,4 Ref=off

Signal 1: DAD1 A, Sig=225,4 Ref=off

| Peak #   | RetTime [min] | Type | Width [min] | Area [mAU*s] | Height [mAU] | Area %  | Peak #   | RetTime [min] | Type | Width [min] | Area [mAU*s] | Height [mAU] | Area %  |
|----------|---------------|------|-------------|--------------|--------------|---------|----------|---------------|------|-------------|--------------|--------------|---------|
| 1        | 27.630        | BB   | 0.9045      | 1906.30286   | 32.11412     | 50.4880 | 1        | 27.571        | BB   | 0.8910      | 4492.52539   | 78.11236     | 86.2477 |
| 2        | 34.296        | BB   | 1.0893      | 1869.45386   | 25.44028     | 49.5120 | 2        | 34.142        | BB   | 0.8571      | 716.33740    | 10.03198     | 13.7523 |
| Totals : |               |      |             | 3775.75671   | 57.55440     |         | Totals : |               |      |             | 5208.86279   | 88.14434     |         |

**(R)-4-(3-(Cyclopentyloxy)-4-methoxyphenyl)-1-tosylpyrrolidin-2-one (4bq)**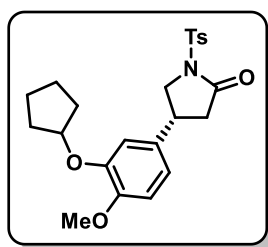

Following General Procedure (i). Clear-orange gum.

**Run 1:** (96.2 mg, 0.224 mmol, 75% yield). **Run 2:** (93.7 mg, 0.218 mmol, 73% yield).**Average: 74% yield.**

The enantiomeric ratio was determined by HPLC analysis in comparison to a racemic material using Daicel Chiralpak® IC column (4.6 mm × 250 mm) at 30 °C and 50:50 hexanes:iPrOH (1.3 mL min<sup>-1</sup>) as mobile phase, λ = 210 nm (*t<sub>r</sub>* = 16.1 min (major),

29.3 min (minor)).

**<sup>1</sup>H NMR (400 MHz, CDCl<sub>3</sub>)** δ 7.92 (d, *J* = 8.3 Hz, 2H), 7.33 (d, *J* = 8.1 Hz, 2H), 6.77 (m, 1H), 6.67 – 6.62 (m, 2H), 4.68 (m, 1H), 4.28 (dd, *J* = 9.9, 7.9 Hz, 1H), 3.81 (s, 3H), 3.75 (dd, *J* = 9.9, 7.7 Hz, 1H), 3.51 (quint, *J* = 8.2 Hz, 1H), 2.80 (dd, *J* = 17.3, 8.4 Hz, 1H), 2.57 (dd, *J* = 17.3, 9.0 Hz, 1H), 2.44 (s, 3H), 1.99 – 1.59 (m, 8H).

**<sup>13</sup>C NMR (101 MHz, CDCl<sub>3</sub>)** δ 172.3, 149.6, 148.1, 145.3, 135.2, 132.4, 129.8, 128.2, 118.6, 113.5, 112.3, 80.7, 56.2, 54.0, 39.8, 36.8, 32.9, 24.1, 21.8.

[α]<sub>D</sub><sup>20</sup> = -24 (c 1.08, CHCl<sub>3</sub>, 83:17 er)**HRMS (ESI+)** *m/z* calculated for C<sub>23</sub>H<sub>27</sub>NO<sub>5</sub>S+H<sup>+</sup> [M+H]<sup>+</sup> 430.16827, found 430.16810.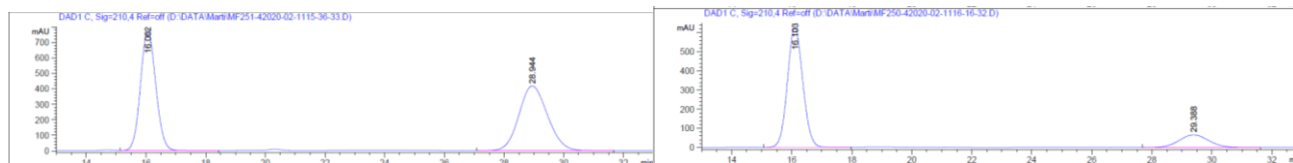

Signal 2: DAD1 C, Sig=210,4 Ref=off

Signal 2: DAD1 C, Sig=210,4 Ref=off

| Peak #   | RetTime [min] | Type | Width [min] | Area [mAU*s] | Height [mAU] | Area %  | Peak #   | RetTime [min] | Type | Width [min] | Area [mAU*s] | Height [mAU] | Area %  |
|----------|---------------|------|-------------|--------------|--------------|---------|----------|---------------|------|-------------|--------------|--------------|---------|
| 1        | 16.062        | BB   | 0.5528      | 2.76054e4    | 776.44836    | 49.8664 | 1        | 16.103        | BB   | 0.5531      | 2.23594e4    | 628.41785    | 83.2518 |
| 2        | 28.944        | BB   | 1.0319      | 2.77532e4    | 417.29385    | 50.1336 | 2        | 29.388        | BB   | 1.0419      | 4498.17578   | 65.93841     | 16.7482 |
| Totals : |               |      |             | 5.53586e4    | 1193.74222   |         | Totals : |               |      |             | 2.68576e4    | 694.35625    |         |

**(R)-4-(4-Methoxyphenyl)-1-((2-nitrophenyl)sulfonyl)pyrrolidin-2-one (4ca).**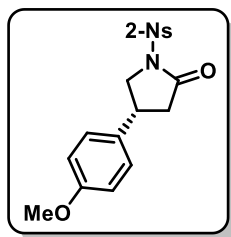

Following General Procedure (ii). Yellow oil.

**Run 1:** (77.3 mg, 0.205 mmol, 69% yield). **Run 2:** (73.0 mg, 0.194 mmol, 65% yield).**Average: 67% yield.**

The enantiomeric ratio was determined by SFC analysis in comparison to a racemic material using Daicel Chiralpak® IC column (4.6 mm × 250 mm) at 30 °C and 7% MeOH in supercritical CO<sub>2</sub> (3.0 mL min<sup>-1</sup>) as mobile phase, λ = 225 nm (*t<sub>r</sub>* = 14.6 min (minor),

15.5 min (major)).

**<sup>1</sup>H NMR (500 MHz, CDCl<sub>3</sub>)** δ 8.53 – 7.45 (m, 1H), 7.87 – 7.73 (m, 3H), 7.20 (d, *J* = 8.6 Hz, 2H), 6.90 (d, *J* = 8.7 Hz, 2H), 4.41 (dd, *J* = 10.0, 8.2 Hz, 1H), 3.96 (t, *J* = 9.6 Hz, 1H), 3.81 (s, 3H), 3.78 – 3.64 (m, 1H), 2.82 (dd, *J* = 17.3, 8.3 Hz, 1H), 2.73 (dd, *J* = 17.3, 10.9 Hz, 1H).

**<sup>13</sup>C NMR (126 MHz, CDCl<sub>3</sub>)** δ 172.53, 159.10, 148.03, 135.04, 134.56, 132.08, 131.52, 130.97, 127.91, 124.31, 114.45, 55.35, 53.78, 39.63, 37.43.

[α]<sub>D</sub><sup>20</sup> = +19 (c 0.50, MeOH, 70:30 er).

**HRMS (ESI+)** *m/z* calculated for C<sub>17</sub>H<sub>16</sub>N<sub>2</sub>O<sub>6</sub>S+H<sup>+</sup> [M+H]<sup>+</sup> 377.08018, found 377.07969.

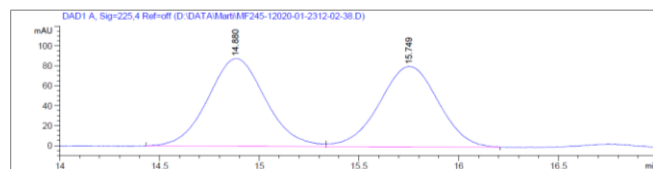

Signal 1: DAD1 A, Sig=225,4 Ref=off

| Peak # | RetTime [min] | Type | Width [min] | Area [mAU*s] | Height [mAU] | Area %  |
|--------|---------------|------|-------------|--------------|--------------|---------|
| 1      | 14.880        | BV R | 0.2394      | 1764.88013   | 87.84776     | 51.5192 |
| 2      | 15.749        | VV R | 0.2531      | 1660.79224   | 80.54211     | 48.4808 |

Totals : 3425.67236 168.38988

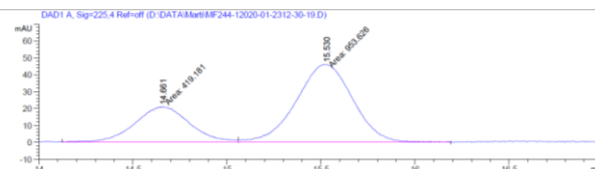

Signal 1: DAD1 A, Sig=225,4 Ref=off

| Peak # | RetTime [min] | Type | Width [min] | Area [mAU*s] | Height [mAU] | Area %  |
|--------|---------------|------|-------------|--------------|--------------|---------|
| 1      | 14.661        | MF   | 0.3347      | 419.18085    | 20.87205     | 30.5346 |
| 2      | 15.530        | FM   | 0.3457      | 953.62640    | 45.97793     | 69.4654 |

Totals : 1372.80725 66.84998

#### 4-Phenyl-1-((2-nitrophenyl)sulfonyl)pyrrolidin-2-one (4cb).

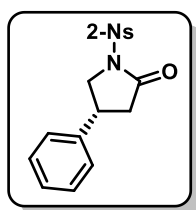

Following General Procedure (ii). Colorless oil.

**Run 1:** (77.0 mg, 0.222 mmol, 74% yield). **Run 2:** (72.8 mg, 0.211 mmol, 70% yield).

**Average: 72% yield.**

The enantiomeric ratio was determined by SFC analysis in comparison to a racemic material using Daicel Chiralpak® IC column (4.6 mm × 250 mm) at 30 °C and 4% MeOH in supercritical CO<sub>2</sub> (3.0 mL min<sup>-1</sup>) as mobile phase, λ = 210 nm (*t<sub>r</sub>* = 15.9 min (major), 16.7 min (minor)).

**<sup>1</sup>H NMR (500 MHz, CDCl<sub>3</sub>)** δ 8.61-8.34 (m, 1H), 7.89 - 7.60 (m, 3H), 7.39 – 7.25 (m, 5H), 4.45 (dd, *J* = 10.0, 8.2 Hz, 1H), 4.04 (t, *J* = 9.5 Hz, 1H), 3.77 (quint, *J* = 8.5 Hz, 1H), 2.85 (dd, *J* = 17.3, 8.4 Hz, 1H), 2.77 (dd, *J* = 17.3, 10.8 Hz, 1H).

**<sup>13</sup>C NMR (126 MHz, CDCl<sub>3</sub>)** δ 172.46, 148.05, 139.13, 135.15, 134.55, 132.13, 131.46, 129.13, 127.82, 126.90, 124.37, 53.58, 39.42, 38.05.

[α]<sub>D</sub><sup>20</sup> = +20 (c 0.50, MeOH, 70:30 er)

**HRMS (ESI+)** *m/z* calculated for C<sub>16</sub>H<sub>14</sub>N<sub>2</sub>O<sub>5</sub>S+H<sup>+</sup> [M+H]<sup>+</sup> 347.06962, found 347.06950.

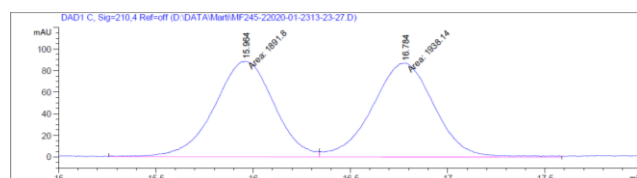

Signal 2: DAD1 C, Sig=210,4 Ref=off

| Peak # | RetTime [min] | Type | Width [min] | Area [mAU*s] | Height [mAU] | Area %  |
|--------|---------------|------|-------------|--------------|--------------|---------|
| 1      | 15.964        | MF   | 0.3558      | 1891.79810   | 88.62054     | 49.3950 |
| 2      | 16.784        | FM   | 0.3716      | 1938.14185   | 86.93184     | 50.6050 |

Totals : 3829.93994 175.55238

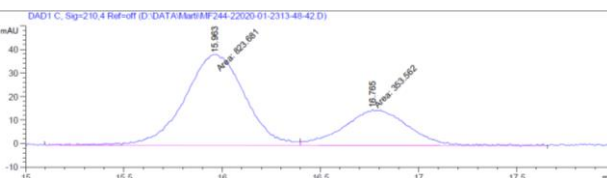

Signal 2: DAD1 C, Sig=210,4 Ref=off

| Peak # | RetTime [min] | Type | Width [min] | Area [mAU*s] | Height [mAU] | Area %  |
|--------|---------------|------|-------------|--------------|--------------|---------|
| 1      | 15.963        | MF   | 0.3544      | 823.68066    | 38.73061     | 69.9669 |
| 2      | 16.765        | FM   | 0.3866      | 353.56189    | 15.24101     | 30.0331 |

Totals : 1177.24255 53.97161

**(R)-1-((2-Nitrophenyl)sulfonyl)-4-(4-(trifluoromethyl)phenyl)pyrrolidin-2-one (4cc).**

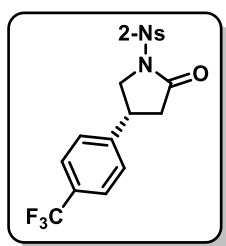

Following General Procedure (ii). Yellow oil.

**Run 1:** (54.7 mg, 0.158 mmol, 53% yield). **Run 2:** (44.3 mg, 0.127 mmol, 43% yield).

**Average: 48% yield.**

The enantiomeric ratio was determined by SFC analysis in comparison to a racemic material using Daicel Chiralpak® IC column (4.6 mm x 250 mm) at 30 °C and 4% MeOH in supercritical CO<sub>2</sub> (3.0 mL min<sup>-1</sup>) as mobile, λ = 210 nm (*t<sub>r</sub>* = 24.2 min (minor), 25.8 min (major)).

**<sup>1</sup>H NMR (500 MHz, CDCl<sub>3</sub>)** δ 8.52 - 8.42 (m, 1H), 7.88 – 7.74 (m, 3H), 7.64 (d, *J* = 8.2 Hz, 2H), 7.42 (d, *J* = 8.2 Hz, 2H), 4.48 (dd, *J* = 10.1, 8.2 Hz, 1H), 4.03 (dd, *J* = 10.0, 9.0 Hz, 1H), 3.90 – 3.79 (quint, *J* = 6.4 Hz, 1H), 2.90 (dd, *J* = 17.3, 8.4 Hz, 1H), 2.77 (dd, *J* = 17.3, 10.4 Hz, 1H).

**<sup>13</sup>C NMR (126 MHz, CDCl<sub>3</sub>)** δ 171.84, 148.03, 143.30, 135.27, 134.58, 132.19, 131.31, 130.52, 130.27, 130.00, 129.75, 127.37, 127.17, 126.14, 126.11, 126.08, 126.06, 125.00, 124.41, 122.84, 120.67, 53.12, 39.17, 37.71.

**<sup>19</sup>F NMR (470 MHz, CDCl<sub>3</sub>)** δ – 62.61 ppm.

[α]<sub>D</sub><sup>20</sup> = +8 (c 0.95, MeOH, 65:35 er).

**HRMS (ESI+)** *m/z* calculated for C<sub>17</sub>H<sub>13</sub>F<sub>3</sub>N<sub>2</sub>O<sub>5</sub>S+H<sup>+</sup> [M+H]<sup>+</sup> 415.05700, found 415.05689.

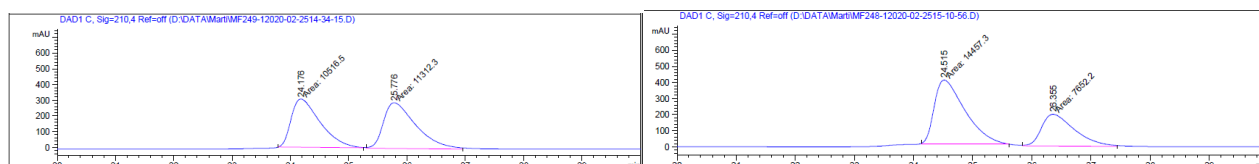

Signal 2: DAD1 C, Sig=210,4 Ref=off

| Peak # | RetTime [min] | Type | Width [min] | Area [mAU*s] | Height [mAU] | Area %  |
|--------|---------------|------|-------------|--------------|--------------|---------|
| 1      | 3.124         | BB   | 0.1526      | 113.91563    | 11.80131     | 0.5184  |
| 2      | 3.665         | BB   | 0.1046      | 10.57407     | 1.45828      | 0.0481  |
| 3      | 7.198         | BB   | 0.1717      | 21.86050     | 1.85268      | 0.0995  |
| 4      | 24.176        | MM   | 0.5734      | 1.05165e4    | 305.65854    | 47.8563 |
| 5      | 25.776        | MM   | 0.6472      | 1.13123e4    | 291.31415    | 51.4778 |

Totals : 2.19751e4 612.08495

Signal 2: DAD1 C, Sig=210,4 Ref=off

| Peak # | RetTime [min] | Type | Width [min] | Area [mAU*s] | Height [mAU] | Area %  |
|--------|---------------|------|-------------|--------------|--------------|---------|
| 1      | 24.515        | MM   | 0.6048      | 1.44573e4    | 398.41202    | 65.3895 |
| 2      | 26.355        | MM   | 0.6486      | 7652.20361   | 196.63274    | 34.6105 |

Totals : 2.21095e4 595.04475

**(R)-4-(4-Methoxyphenyl)-1-((4-nitrophenyl)sulfonyl)pyrrolidin-2-one (4da)**

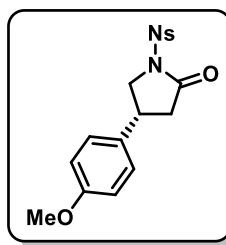

Following General Procedure (ii). Yellow oil.

**Run 1:** (96.5 mg, 0.257 mmol, 86% yield). **Run 2:** (92.9 mg, 0.247 mmol, 82% yield).

**Average: 84% yield.**

The enantiomeric ratio was determined by HPLC analysis in comparison to a racemic material using Daicel Chiralpak® IB column (4.6 mm x 250 mm) at 30 °C and 50:50 hexanes:iPrOH (1.3 mL min<sup>-1</sup>) as mobile phase, λ = 260 nm (*t<sub>r</sub>* = 15.0 min (major), 17.5 min (minor)).

**<sup>1</sup>H NMR (500 MHz, CDCl<sub>3</sub>)** δ 8.39 (d, *J* = 8.9 Hz, 2H), 8.24 (d, *J* = 8.9 Hz, 2H), 7.06 (d, *J* = 8.6 Hz, 2H), 6.85 (d, *J* = 8.7 Hz, 2H), 4.34 (dd, *J* = 10.0, 7.8 Hz, 1H), 3.79 (s, 3H), 3.78 (m, 1H), 3.60 (m, 1H), 2.85 (dd, *J* = 17.5, 8.3 Hz, 1H), 2.63 (dd, *J* = 17.5, 9.2 Hz, 1H).

**$^{13}\text{C}$  NMR (126 MHz,  $\text{CDCl}_3$ )**  $\delta$  172.40, 159.19, 150.94, 143.37, 131.10, 129.60, 127.60, 124.28, 114.50, 88.22, 55.36, 54.19, 39.39, 36.79.

**$[\alpha]^{20}_{\text{D}}$**  = -25 (c 0.98,  $\text{CHCl}_3$ , 86:14 er)

**HRMS (ESI+)**  $m/z$  calculated for  $\text{C}_{17}\text{H}_{16}\text{N}_2\text{O}_6\text{S}+\text{Na}^+$   $[\text{M}+\text{Na}]^+$  399.06213, found 399.06135.

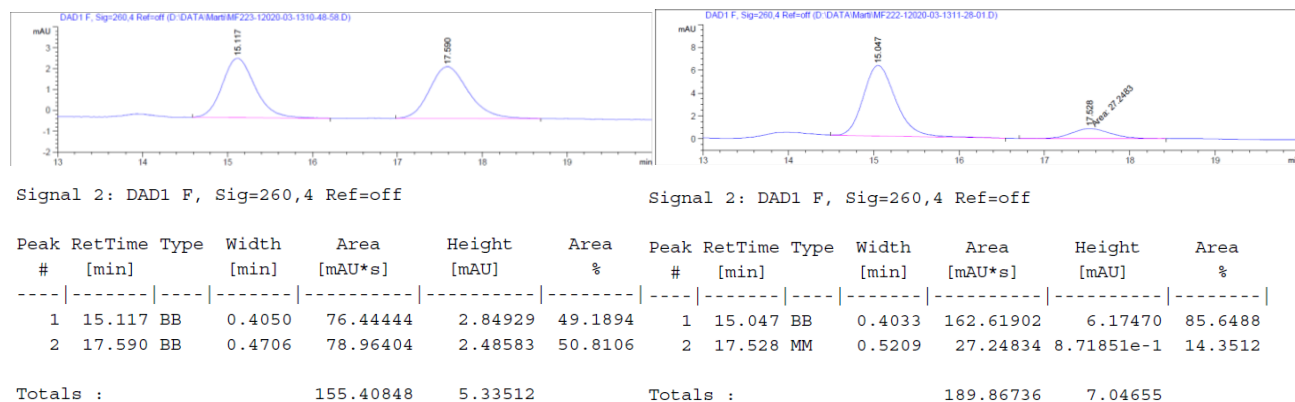

### (R)-1-((4-Nitrophenyl)sulfonyl)-4-phenylpyrrolidin-2-one (4db)

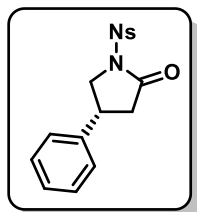

Following General Procedure (ii). Colorless oil.

**Run 1:** (78.9 mg, 0.228 mmol, 76% yield). **Run 2:** (70.6 mg, 0.204 mmol, 68% yield).

**Average: 72% yield.**

The enantiomeric ratio was determined by HPLC analysis in comparison to a racemic material using Daicel Chiralpak® IB column (4.6 mm × 250 mm) at 30 °C and 50:50

hexanes:iPrOH ( $1.3 \text{ mL min}^{-1}$ ) as mobile phase,  $\lambda = 260 \text{ nm}$  ( $t_r = 17.8 \text{ min}$  (major), 20.5 min (minor)).

**$^1\text{H}$  NMR (500 MHz,  $\text{CDCl}_3$ )**  $\delta$  8.39 (d,  $J = 8.7 \text{ Hz}$ , 2H), 8.25 (d,  $J = 8.8 \text{ Hz}$ , 2H), 7.38 - 7.28 (m, 3H), 7.19 – 7.07 (m, 2H), 4.38 (dd,  $J = 9.9, 8.0 \text{ Hz}$ , 1H), 3.85 (dd,  $J = 9.9, 8.0 \text{ Hz}$ , 1H), 3.67 (quint,  $J = 8.2, 1 \text{ Hz}$ ), 2.89 (dd,  $J = 17.5, 8.4 \text{ Hz}$ , 1H), 2.68 (dd,  $J = 17.5, 9.2 \text{ Hz}$ , 1H).

**$^{13}\text{C}$  NMR (126 MHz,  $\text{CDCl}_3$ )**  $\delta$  172.28, 150.96, 143.33, 139.28, 129.61, 129.19, 127.93, 126.52, 124.30, 53.93, 39.19, 37.36.

**$[\alpha]^{20}_{\text{D}}$**  = -27 (c 1.02,  $\text{CHCl}_3$ , 80:20 er)

**HRMS (ESI+)**  $m/z$  calculated for  $\text{C}_{16}\text{H}_{14}\text{N}_2\text{O}_5\text{S}+\text{H}^+$   $[\text{M}+\text{H}]^+$  347.06962, found 347.06940.

**HRMS (ESI+)**  $m/z$  calculated for  $\text{C}_{16}\text{H}_{14}\text{N}_2\text{O}_5\text{S}+\text{Na}^+$   $[\text{M}+\text{Na}]^+$  369.05156, found 369.05130.

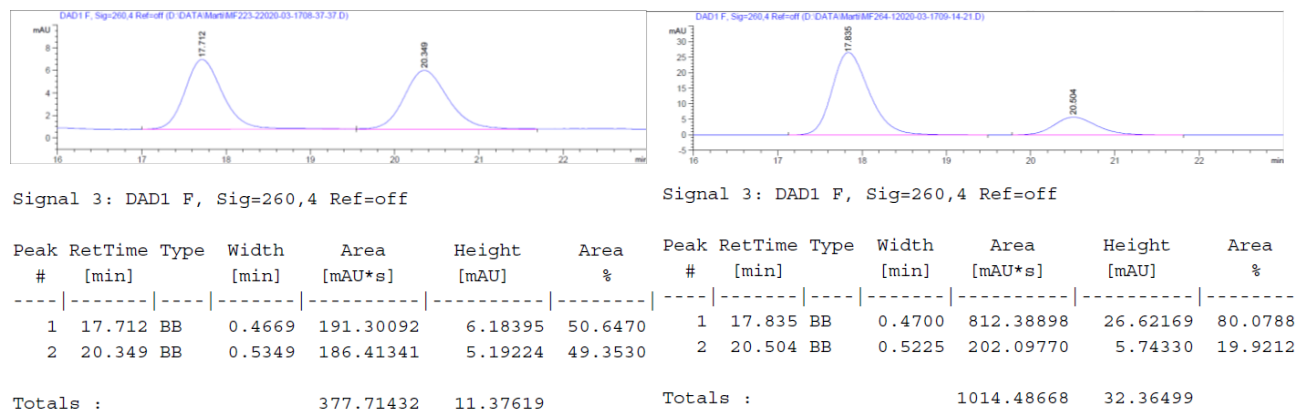

**(R)-1-((4-Nitrophenyl)sulfonyl)-4-(4-(trifluoromethyl)phenyl)pyrrolidin-2-one (4dc)**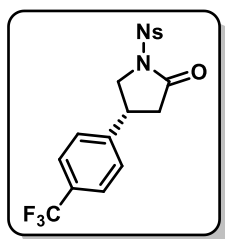

Following General Procedure (ii). Colorless solid.

**Run 1:** (95.6 mg, 0.230 mmol, 77% yield). **Run 2:** (88.7 mg, 0.214 mmol, 71% yield).

**Average: 74% yield.**

The enantiomeric ratio was determined by HPLC analysis in comparison to a racemic material using Daicel Chiralpak® IB column (4.6 mm × 250 mm) at 30 °C and 50:50 hexanes:iPrOH (1.3 mL min<sup>-1</sup>) as mobile phase, λ = 260 nm (*t<sub>r</sub>* = 11.9 min (major), 15.9 min (minor)).

**<sup>1</sup>H NMR (250 MHz, CDCl<sub>3</sub>)** δ 8.41 (d, *J* = 8.9 Hz, 2H), 8.28 (d, *J* = 8.9 Hz, 2H), 7.62 (d, *J* = 8.2 Hz, 2H), 7.31 (d, *J* = 8.2 Hz, 2H), 4.40 (dd, *J* = 10.0, 7.9 Hz, 1H), 3.86 (dd, *J* = 10.0, 7.9 Hz, 1H), 3.80 – 3.68 (m, 1H), 2.93 (dd, *J* = 17.5, 8.4 Hz, 1H), 2.69 (dd, *J* = 17.5, 9.2 Hz, 1H).

**<sup>13</sup>C NMR (250 MHz, CDCl<sub>3</sub>)** δ 171.57, 151.06, 143.22, 143.16, 130.41 (q, *J* = 32.9 Hz), 129.68, 127.03, 126.21 (q, 3.6 Hz), 124.84, 124.35, 122.68, 120.51, 53.31, 39.00, 37.14.

**<sup>19</sup>F NMR (470 MHz, CDCl<sub>3</sub>)** δ -62.74.

[α]<sub>D</sub><sup>20</sup> = +21 (c 0.50, MeOH, 83:17 er)

**HRMS (ESI+)** *m/z* calculated for C<sub>17</sub>H<sub>13</sub>F<sub>3</sub>N<sub>2</sub>O<sub>5</sub>S+H<sup>+</sup> [M+H]<sup>+</sup> 415.05700, found 415.05667.

**HRMS (ESI+)** *m/z* calculated for C<sub>17</sub>H<sub>13</sub>F<sub>3</sub>N<sub>2</sub>O<sub>5</sub>S +Na<sup>+</sup> [M+Na]<sup>+</sup> 437.03895, found 369.03848.

**mp:** 189-191°C.

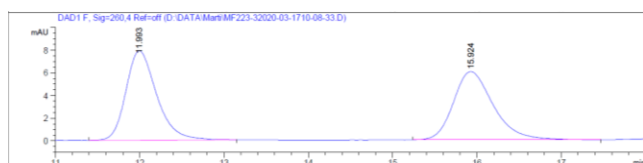

Signal 3: DAD1 F, Sig=260,4 Ref=off

| Peak # | RetTime [min] | Type | Width [min] | Area [mAU*s] | Height [mAU] | Area %  |
|--------|---------------|------|-------------|--------------|--------------|---------|
| 1      | 11.993        | BB   | 0.3827      | 198.98071    | 7.87601      | 50.1625 |
| 2      | 15.924        | BB   | 0.4892      | 197.69135    | 6.01902      | 49.8375 |

Totals : 396.67206 13.89503

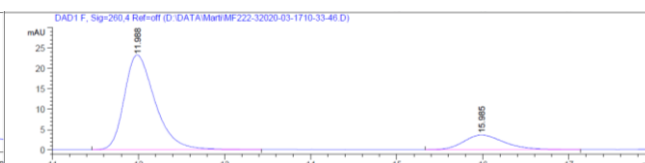

Signal 3: DAD1 F, Sig=260,4 Ref=off

| Peak # | RetTime [min] | Type | Width [min] | Area [mAU*s] | Height [mAU] | Area %  |
|--------|---------------|------|-------------|--------------|--------------|---------|
| 1      | 11.988        | BB   | 0.3778      | 577.20740    | 23.23417     | 83.1789 |
| 2      | 15.985        | BB   | 0.4770      | 116.72707    | 3.55584      | 16.8211 |

Totals : 693.93446 26.79000

**(R)-4-(4-Chlorophenyl)-1-((4-nitrophenyl)sulfonyl)pyrrolidin-2-one (4dd)**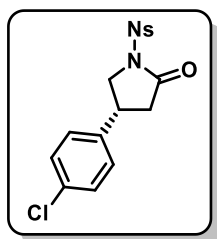

Following General Procedure (ii). Clear-yellow solid.

**Run 1:** (92.6 mg, 0.243 mmol, 81% yield). **Run 2:** (93.5 mg, 0.245 mmol, 81% yield).

**Average: 81% yield.**

The enantiomeric ratio was determined by HPLC analysis in comparison to a racemic material using Daicel Chiralpak® IB-3 column (4.6 mm × 250 mm) at 30 °C and 60:40 hexanes:iPrOH (1.3 mL min<sup>-1</sup>) as mobile phase, λ = 260 nm (*t<sub>r</sub>* = 17.4 min (major), 24.3 min (minor)).

**<sup>1</sup>H NMR (500 MHz, CDCl<sub>3</sub>)** δ 8.40 (d, *J* = 8.8 Hz, 2H), 8.25 (d, *J* = 8.8 Hz, 2H), 7.31 (d, *J* = 8.4 Hz, 2H), 7.09 (d, *J* = 8.4 Hz, 2H), 4.35 (dd, *J* = 9.9, 7.9 Hz, 1H), 3.80 (dd, *J* = 9.9, 8.0 Hz, 1H), 3.63 (quint, *J* = 8.0 Hz, 1H), 2.87 (dd, *J* = 17.5, 8.4 Hz, 1H), 2.63 (dd, *J* = 17.5, 9.2 Hz, 1H).

**<sup>13</sup>C NMR (126 MHz, CDCl<sub>3</sub>)** δ 171.9, 151.2, 143.4, 137.8, 134.0, 129.8, 129.5, 128.0, 124.5, 53.8, 39.3, 37.0.

**[α]<sub>D</sub><sup>20</sup>** = -2 (c 1.02, MeOH, 88:12 er)

**HRMS (ESI+)** *m/z* calculated for C<sub>16</sub>H<sub>13</sub>ClN<sub>2</sub>O<sub>5</sub>S+H<sup>+</sup> [M+H]<sup>+</sup> 381.03065, found 381.03015.

**HRMS (ESI+)** *m/z* calculated for C<sub>16</sub>H<sub>13</sub>ClN<sub>2</sub>O<sub>5</sub>S+Na<sup>+</sup> [M+Na]<sup>+</sup> 403.01259, found 403.01221.

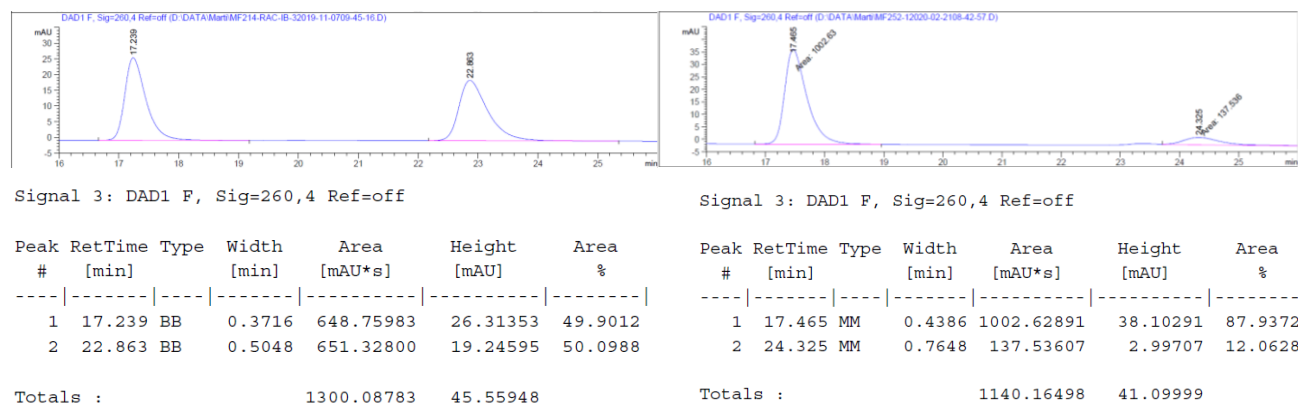

### (*R*)-4-(3-(Cyclopentyloxy)-4-methoxyphenyl)-1-((4-nitrophenyl)sulfonyl)pyrrolidin-2-one (4de)

Following General Procedure (ii). Yellow solid.

**Run 1:** (90.3 mg, 0.196 mmol, 65% yield, 99:1 er). **Run 2:** (84.9 mg, 0.184 mmol, 61% yield). **Average: 63% yield.**

The enantiomeric ratio was determined by HPLC analysis in comparison to a racemic material using Daicel Chiralpak® IC column (4.6 mm × 250 mm) at 30 °C and 50:50 hexanes:iPrOH (1.3 mL min<sup>-1</sup>) as mobile phase, λ = 225 nm (*t<sub>r</sub>* = 17.6 min (major), 24.3 min (minor)).

**<sup>1</sup>H NMR (400 MHz, CDCl<sub>3</sub>)** δ 8.37 (d, *J* = 8.9 Hz, 2H), 8.22 (d, *J* = 8.9 Hz, 2H), 6.77 (d, *J* = 7.9 Hz, 1H), 6.68 – 6.59 (m, 2H), 4.70 (m, 1H), 4.32 (dd, *J* = 9.9, 7.7 Hz, 1H), 3.81 (s, 3H), 3.80 (m, 1H), 3.57 (quint, *J* = 8.0 Hz, 1H), 2.84 (dd, *J* = 17.5, 8.3 Hz, 1H), 2.63 (dd, *J* = 17.5, 8.9 Hz, 1H), 1.97 – 1.61 (m, 8H).

**<sup>13</sup>C NMR (101 MHz, CDCl<sub>3</sub>)** δ 172.5, 151.0, 149.9, 148.2, 143.5, 131.8, 129.7, 124.4, 118.6, 113.7, 112.4, 80.8, 56.2, 54.3, 39.4, 37.1, 32.9, 32.9, 24.1.

**HRMS (ESI+)** *m/z* calculated for C<sub>22</sub>H<sub>24</sub>N<sub>2</sub>O<sub>7</sub>S+H<sup>+</sup> [M+H]<sup>+</sup> 461.13770, found 461.13718.

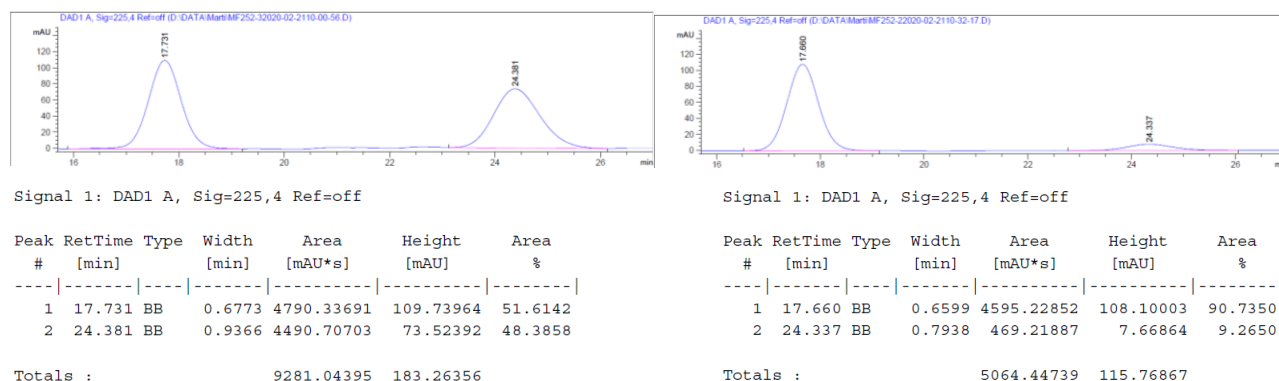



### (R)-4-(4-Chlorophenyl)pyrrolidin-2-one (5a)

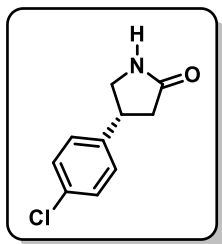

**4dd** (75 mg, 0.20 mmol) was added to the suspension of  $K_2CO_3$  (55 mg, 0.39 mmol) in  $CH_3CN$  (2 mL), then PhSH (31  $\mu$ L, 0.3 mmol) was added at room temperature. Next, DMSO (0.75 mL) was added to the reaction mixture, and stirring was continued at room temperature for 2 h. After complete consumption of the starting compound, the reaction was quenched with water and the aqueous layer was extracted with ethyl acetate. The residue was purified by flash column chromatography using hexanes/MeOH as eluent to provide the compound **5a** (79%, 31 mg, 0.158 mmol). Off-white solid.

The enantiomeric ratio was determined by HPLC analysis in comparison to a racemic material using Daicel Chiralpak® OJ-H column (4.6 mm  $\times$  250 mm) at 30 °C and 90:10 hexanes:iPrOH (1.0 mL min<sup>-1</sup>) as mobile phase,  $\lambda$  = 225 nm ( $t_r$  = 15.3 min (major), 17.4 min (minor)).

**<sup>1</sup>H NMR (500 MHz, CDCl<sub>3</sub>)**  $\delta$  7.32 (d,  $J$  = 8.5 Hz, 2H), 7.19 (d,  $J$  = 8.5 Hz, 2H), 6.31 (bs, 1H), 3.79 (t,  $J$  = 8.8 Hz, 1H), 3.63 (quint,  $J$  = 8.0 Hz, 1H), 3.38 (dd,  $J$  = 9.4, 7.1 Hz, 1H), 2.74 (dd,  $J$  = 16.9, 8.9 Hz, 1H), 2.46 (dd,  $J$  = 16.9, 8.6 Hz, 1H).

**<sup>13</sup>C NMR (126 MHz, CDCl<sub>3</sub>)**  $\delta$  177.3, 140.6, 132.9, 129.0, 128.1, 49.4, 39.7, 37.8.

$[\alpha]^{20}_D$  = -13 (c 1.0, MeOH, 90:10 er)

**HRMS (ESI+)**  $m/z$  calculated for  $C_{10}H_{10}NClO + H^+$  [M+H]<sup>+</sup> 196.05237, found 196.05255.

mp: 105-107°C.

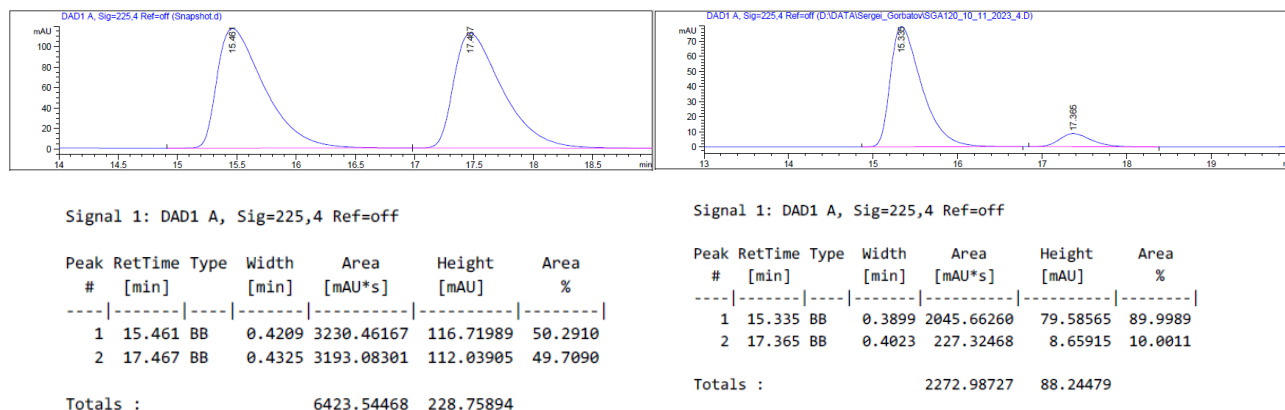

### (R)-4-(3-(Cyclopentyloxy)-4-methoxyphenyl)-1-((4-nitrophenyl)sulfonyl)pyrrolidin-2-one (5b)

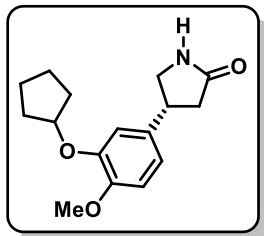

**4de** (48.5 mg, 0.105 mmol) was added to the suspension of  $K_2CO_3$  (29 mg, 0.210 mmol) in  $CH_3CN$  (1 mL), then PhSH (31  $\mu$ L, 0.154 mmol) was added at room temperature. Next, DMSO (0.4 mL) was added to the reaction mixture, and stirring was continued at room temperature for 2 h. After complete consumption of the starting compound, the reaction was quenched with water and the aqueous layer was extracted with ethyl acetate. The residue was purified by flash column chromatography

using hexanes/MeOH as eluent to provide the compound **5b** (97%, 28 mg, 0.102 mmol). White solid.

The enantiomeric ratio was determined by HPLC analysis in comparison to a racemic material using Daicel Chiralpak® IC column (4.6 mm  $\times$  250 mm) at 30 °C and 65:35 hexanes:iPrOH (1.0 mL min<sup>-1</sup>) as mobile phase,  $\lambda$  = 210 nm ( $t_r$  = 20.4 min (minor), 23.3 min (major)).

**$^1\text{H}$  NMR (500 MHz,  $\text{CDCl}_3$ )**  $\delta$  6.83 (dd,  $J$  = 7.9, 2.1 Hz, 1H), 6.80 – 6.75 (m, 2H), 6.43 (bs, 1H), 4.81 – 4.73 (m, 1H), 3.83 (s, 3H), 3.76 (t,  $J$  = 8.9 Hz, 1H), 3.64 (quint,  $J$  = 8.4 Hz, 1H), 3.42 – 3.35 (m, 1H), 2.71 (dd,  $J$  = 16.9, 2.0 Hz, 1H), 2.48 (dd,  $J$  = 16.9, 2.1 Hz, 1H), 1.98 – 1.78 (m, 6H), 1.67 – 1.56 (m, 2H).

**$^{13}\text{C}$  NMR (126 MHz,  $\text{CDCl}_3$ )**  $\delta$  177.8, 149.2, 147.9, 134.6, 118.8, 113.9, 112.2, 80.6, 56.2, 49.8, 40.0, 38.1, 32.8, 24.0.

$[\alpha]^{20}_{\text{D}}$  = -15 (c 1.0, MeOH, 82:18 er)

**HRMS (ESI+)**  $m/z$  calculated for  $\text{C}_{16}\text{H}_{21}\text{NO}_3 + \text{H}^+$   $[\text{M} + \text{H}]^+$  276.15942, found 276.15926.

**mp:** 130-132°C.

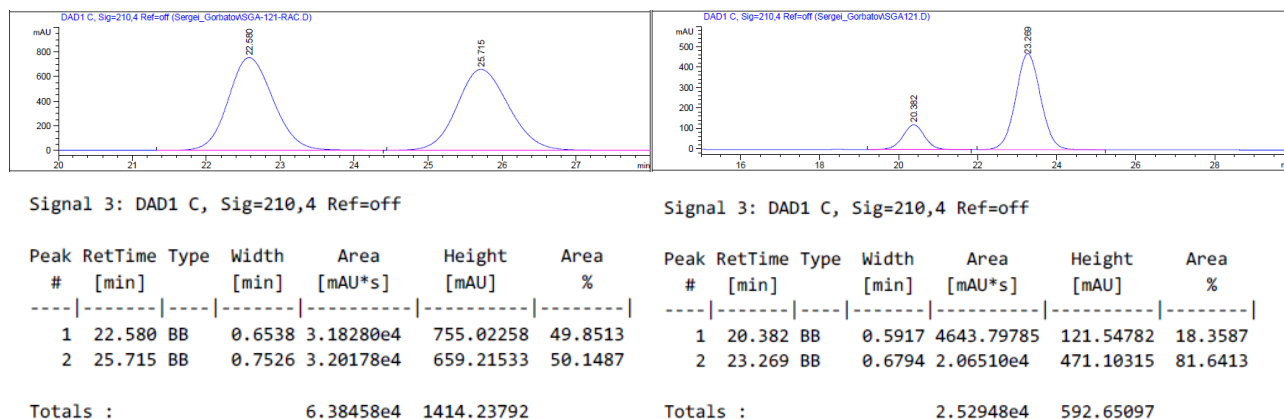

### (*R*)-Baclofen hydrochloride (**6**)

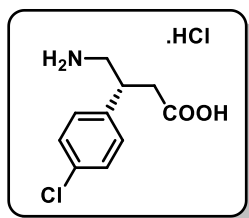

A mixture of compound **5a** (30 mg, 0.153 mmol) in aqueous 6 N HCl (0.5 ml) was heated at 100°C for 10 h. The excess of water in the reaction mixture was removed under reduced pressure to obtain solid residue, which was triturated in isopropanol affording (*R*)-baclofen hydrochloride **6** (76%, 29 mg, 0.116 mmol). White solid.

**$^1\text{H}$  NMR (500 MHz,  $\text{D}_2\text{O}$ )**  $\delta$  7.37 (d,  $J$  = 8.4 Hz, 2H), 7.27 (d,  $J$  = 8.4 Hz, 2H), 3.41 – 3.28 (m, 2H), 3.18 (dd,  $J$  = 12.7, 10.4 Hz, 1H), 2.79 (dd,  $J$  = 16.1, 5.8 Hz, 1H), 2.67 (dd,  $J$  = 16.1, 8.9 Hz, 1H).

**$^{13}\text{C}$  NMR (126 MHz,  $\text{D}_2\text{O}$ )**  $\delta$  175.3, 137.0, 133.4, 129.4, 129.3, 43.6, 39.4, 38.2.

**HRMS (ESI+)**  $m/z$  calculated for  $\text{C}_{10}\text{H}_{12}\text{ClNO}_2 + \text{H}^+$   $[\text{M} + \text{H}]^+$  214.06286, found 214.06293.

It was not possible to determine the optical rotation  $[\alpha]^{20}_{\text{D}}$  of the compound due to its low response on the polarimeter.

Separation of the enantiomers of **6** by normal-phase HPLC was also attempted, but it failed due to its high polarity and low absorbance (DAD detector).

**mp:** 194-196°C (decomposition).



#### 4. $^1\text{H}$ , $^{13}\text{C}$ and $^{19}\text{F}$ NMR Spectra

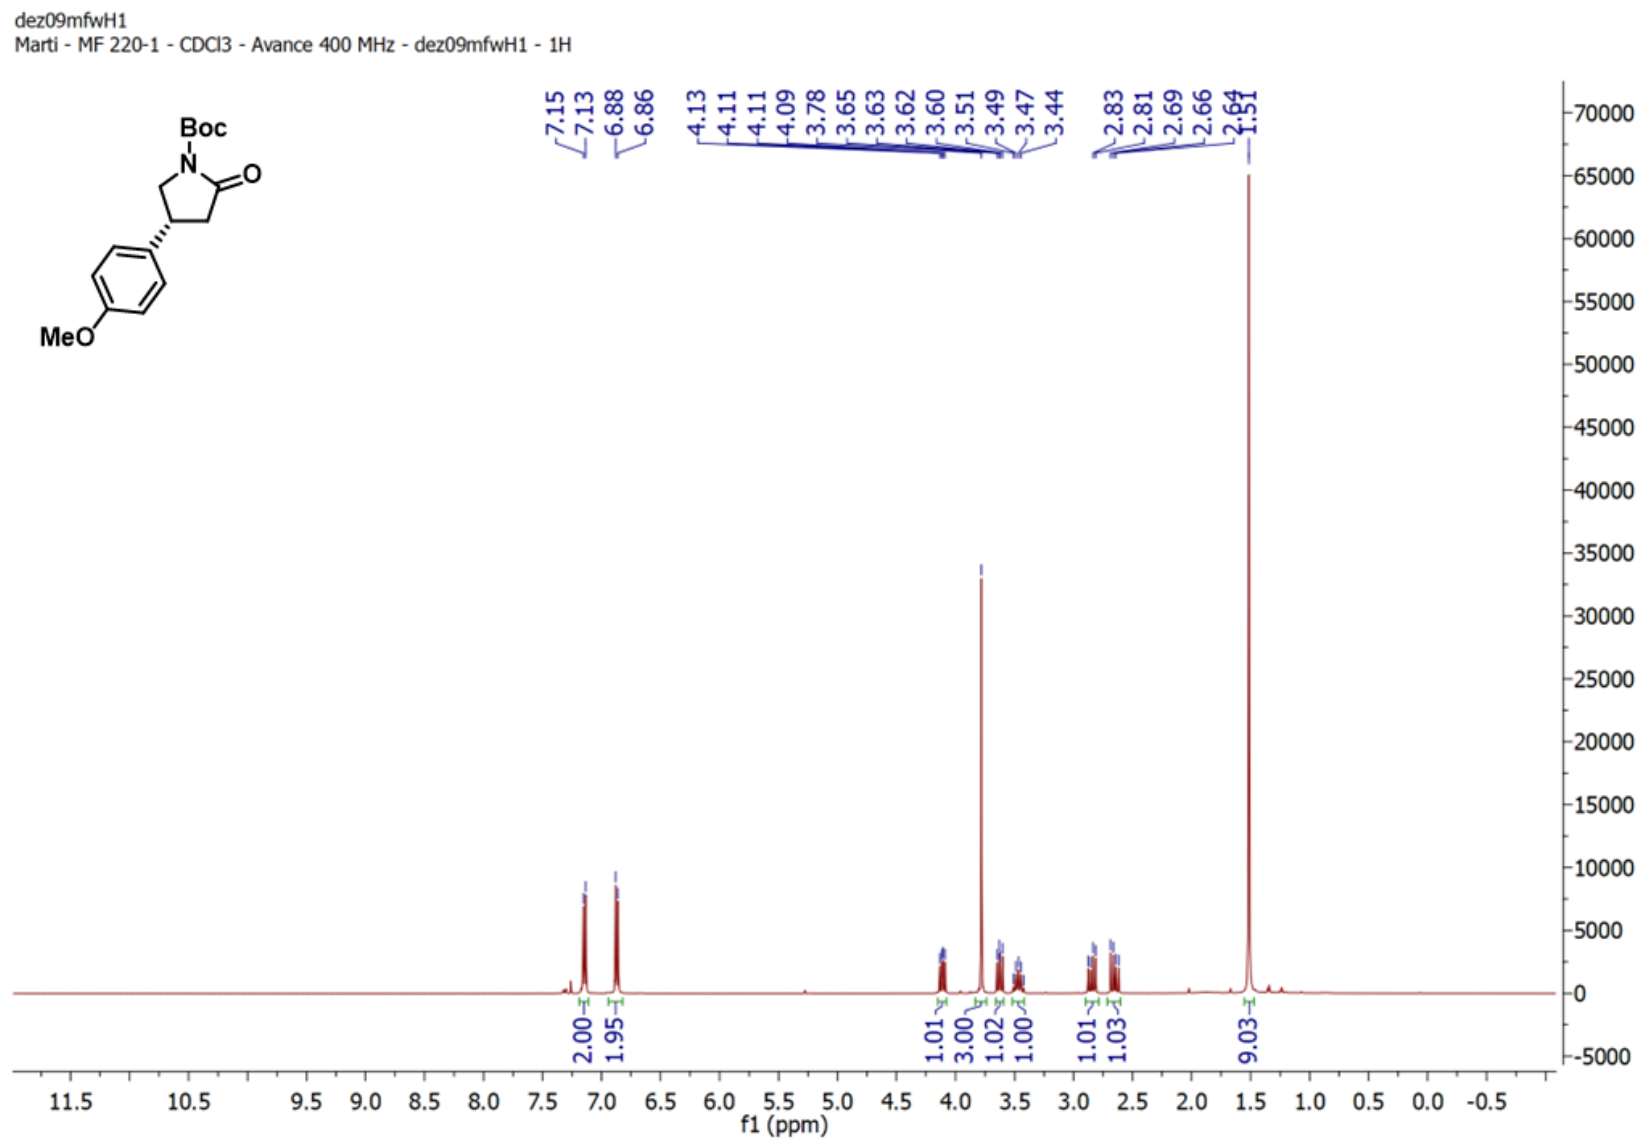

Figure SI8:  $^1\text{H}$  NMR of compound 4aa.

dez09mfwh1  
Marti - MF 220-1 - CDCl<sub>3</sub> - Avance 400 MHz - dez09mfwh1 - <sup>13</sup>C  
23min

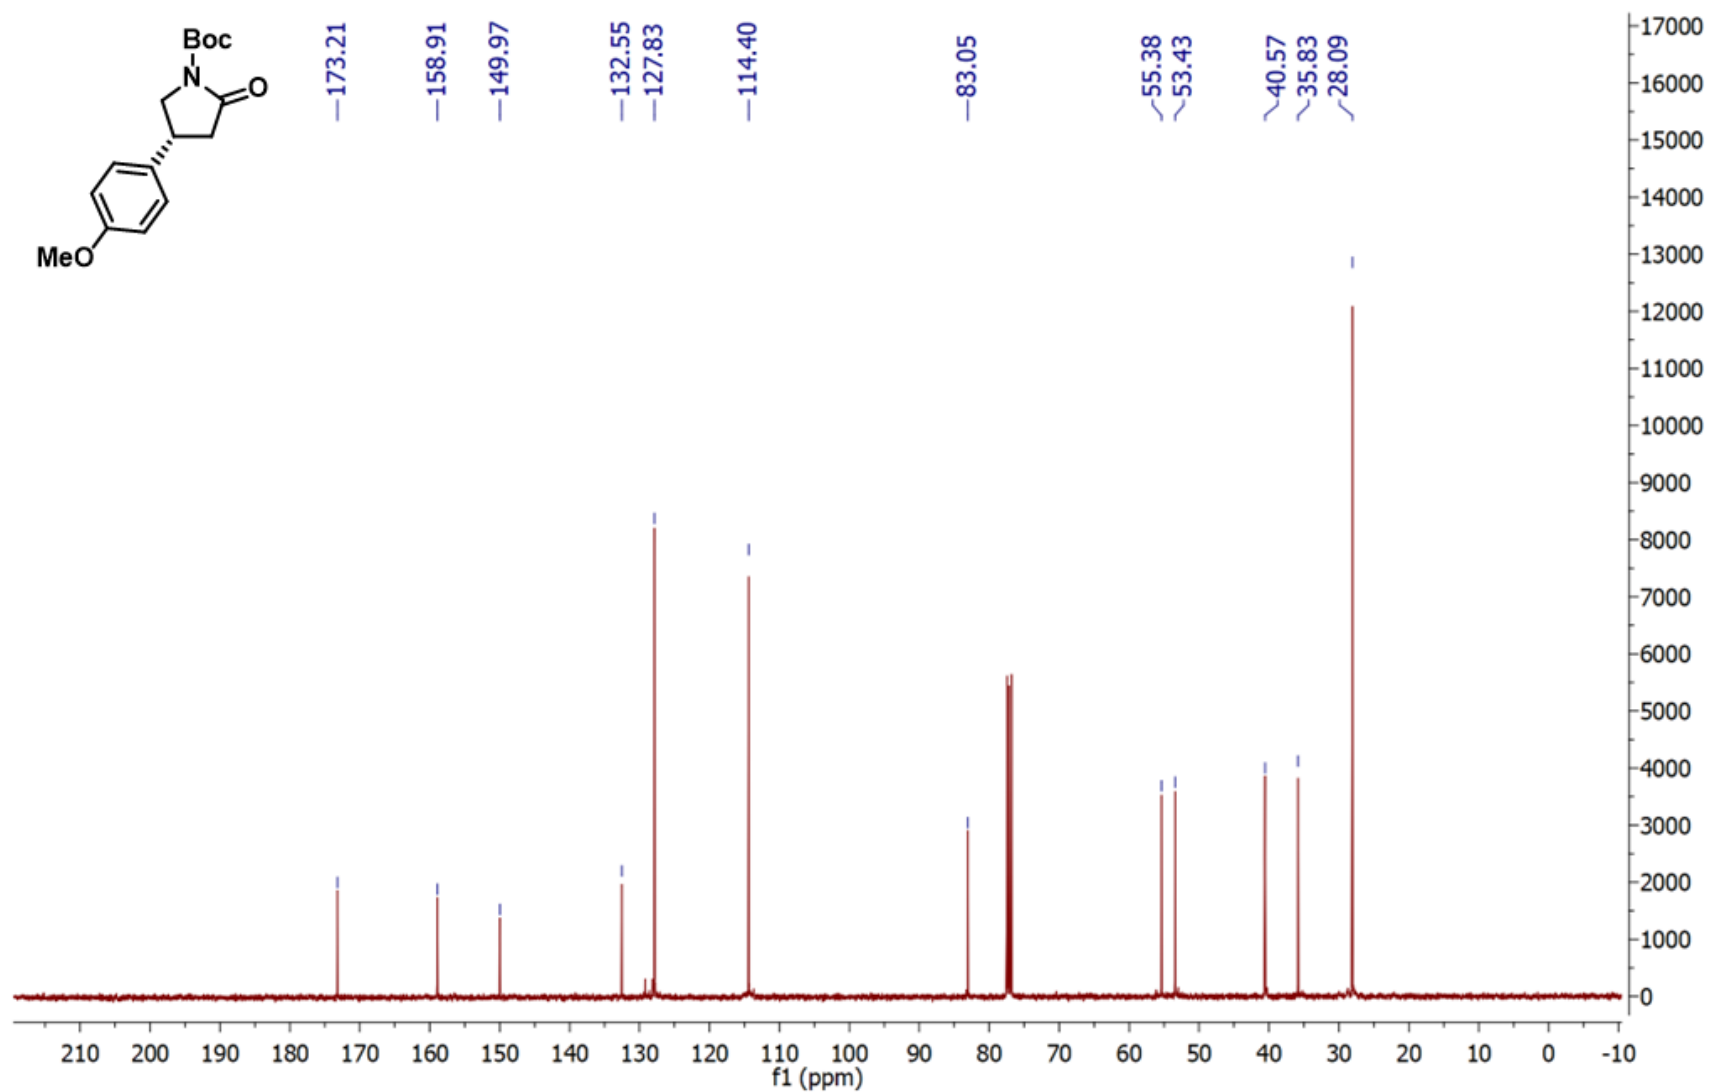

Figure SI9: <sup>13</sup>C NMR of compound 4aa.

dez09mfwh2

Marti - MF 220-2 - CDCl<sub>3</sub> - Avance 400 MHz - dez09mfwh2 - <sup>1</sup>H

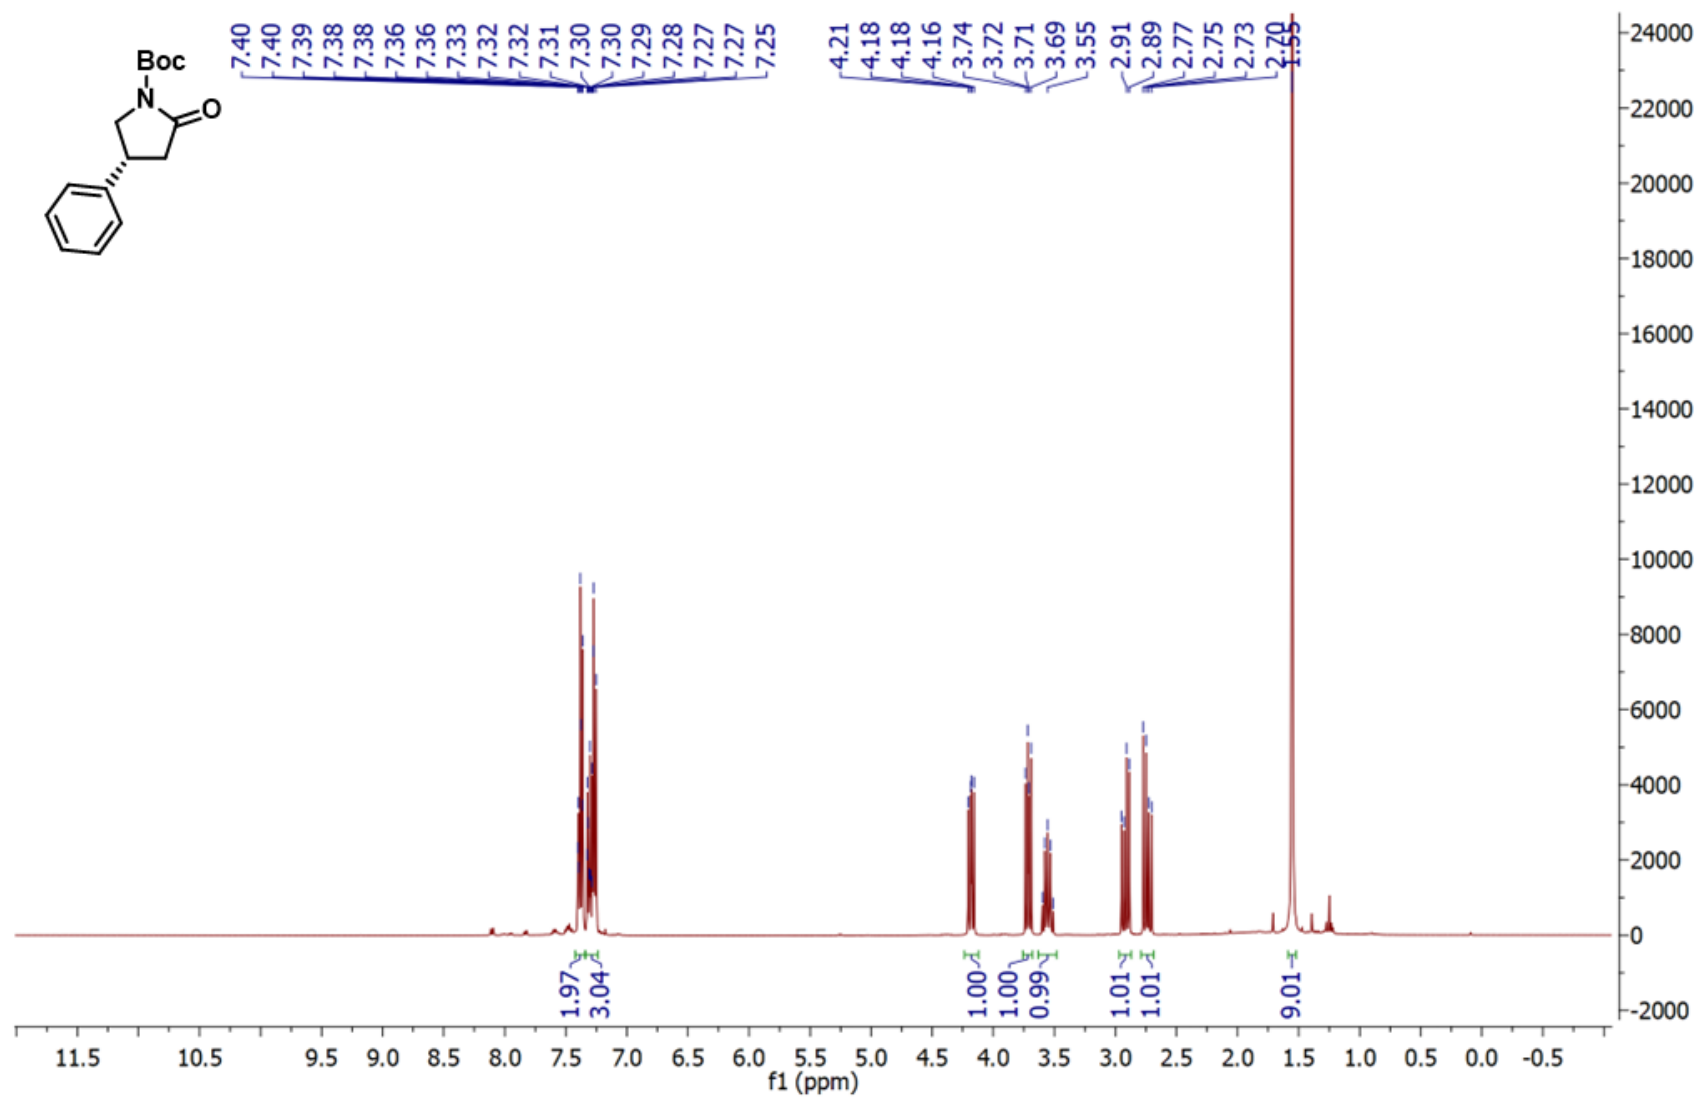

Figure SI10: <sup>1</sup>H NMR of compound 4ab.

dez09mfwh2  
Marti - MF 220-2 - CDCl3 - Avance 400 MHz - dez09mfwh2 - 13C  
21min

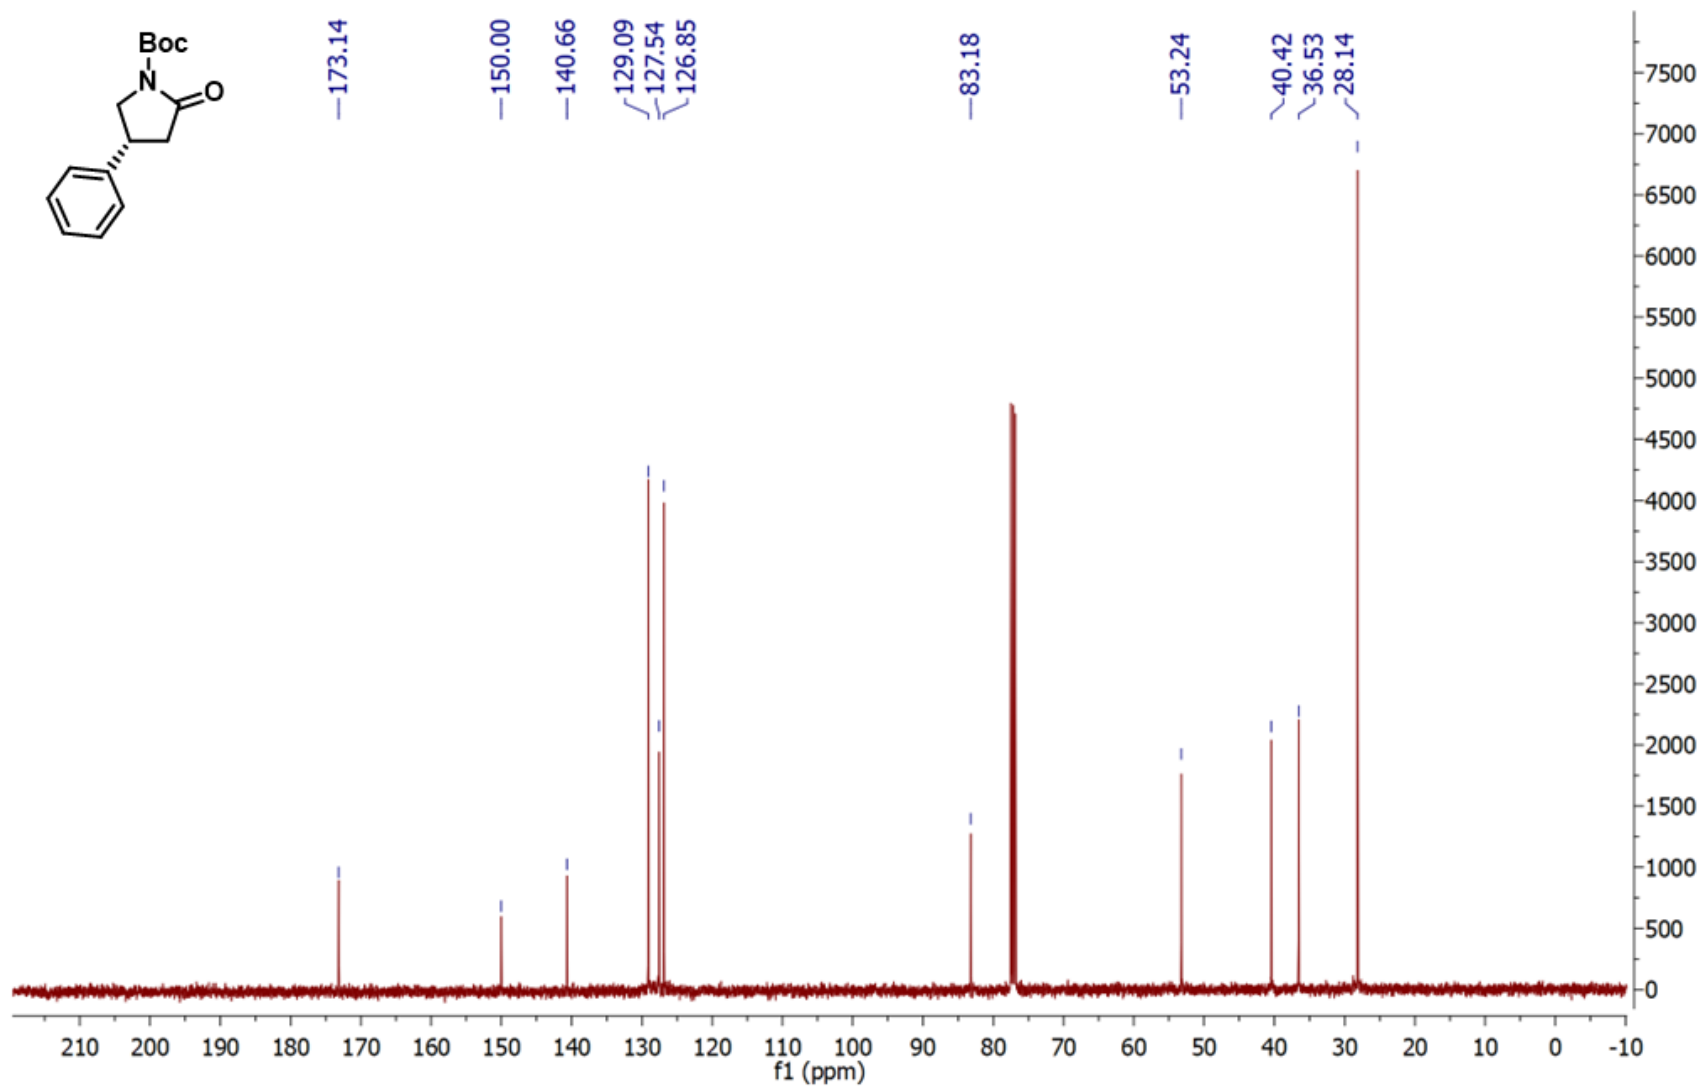

Figure SI11:  $^{13}\text{C}$  NMR of compound **4ab**.

dez09mfwH1

Marti - MF 220-1 - CDCl3 - Avance 400 MHz - dez09mfwH1 - 1H

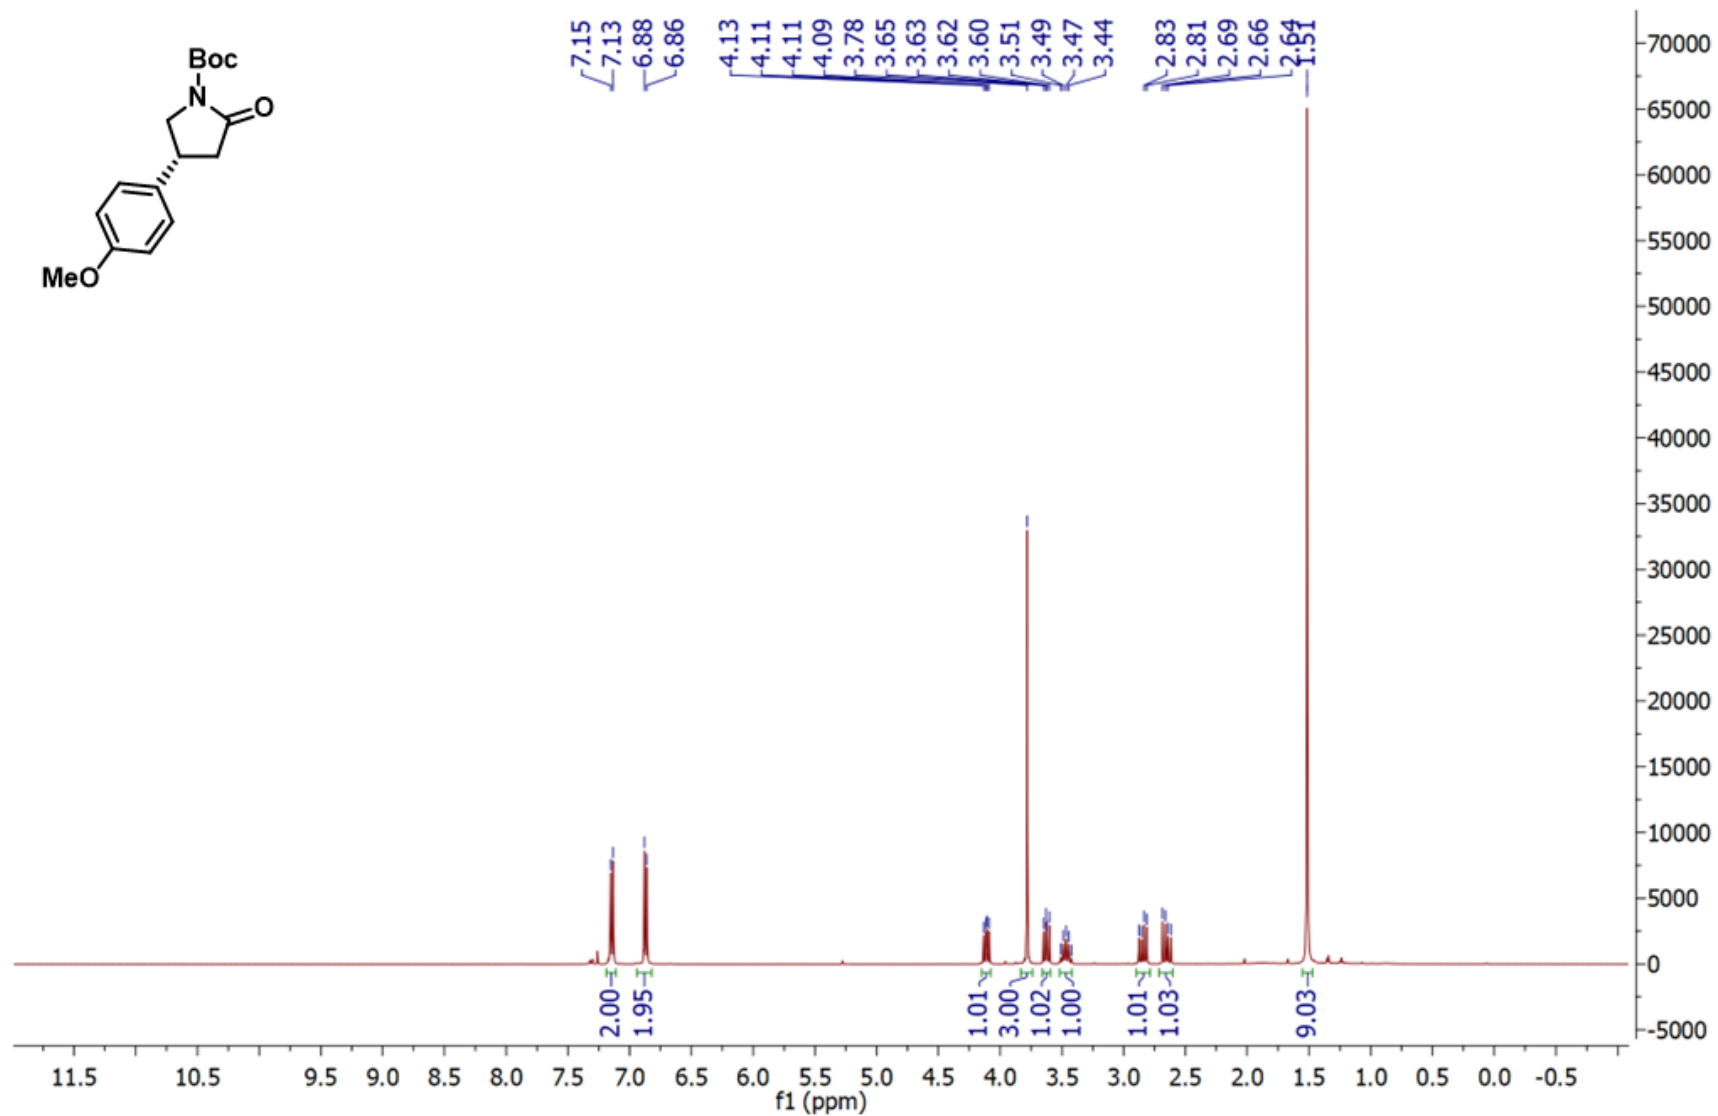

Figure SI12: <sup>1</sup>H NMR of compound **4ac**.

dez09mfwh1  
Marti - MF 220-1 - CDCl3 - Avance 400 MHz - dez09mfwh1 - 13C  
23min

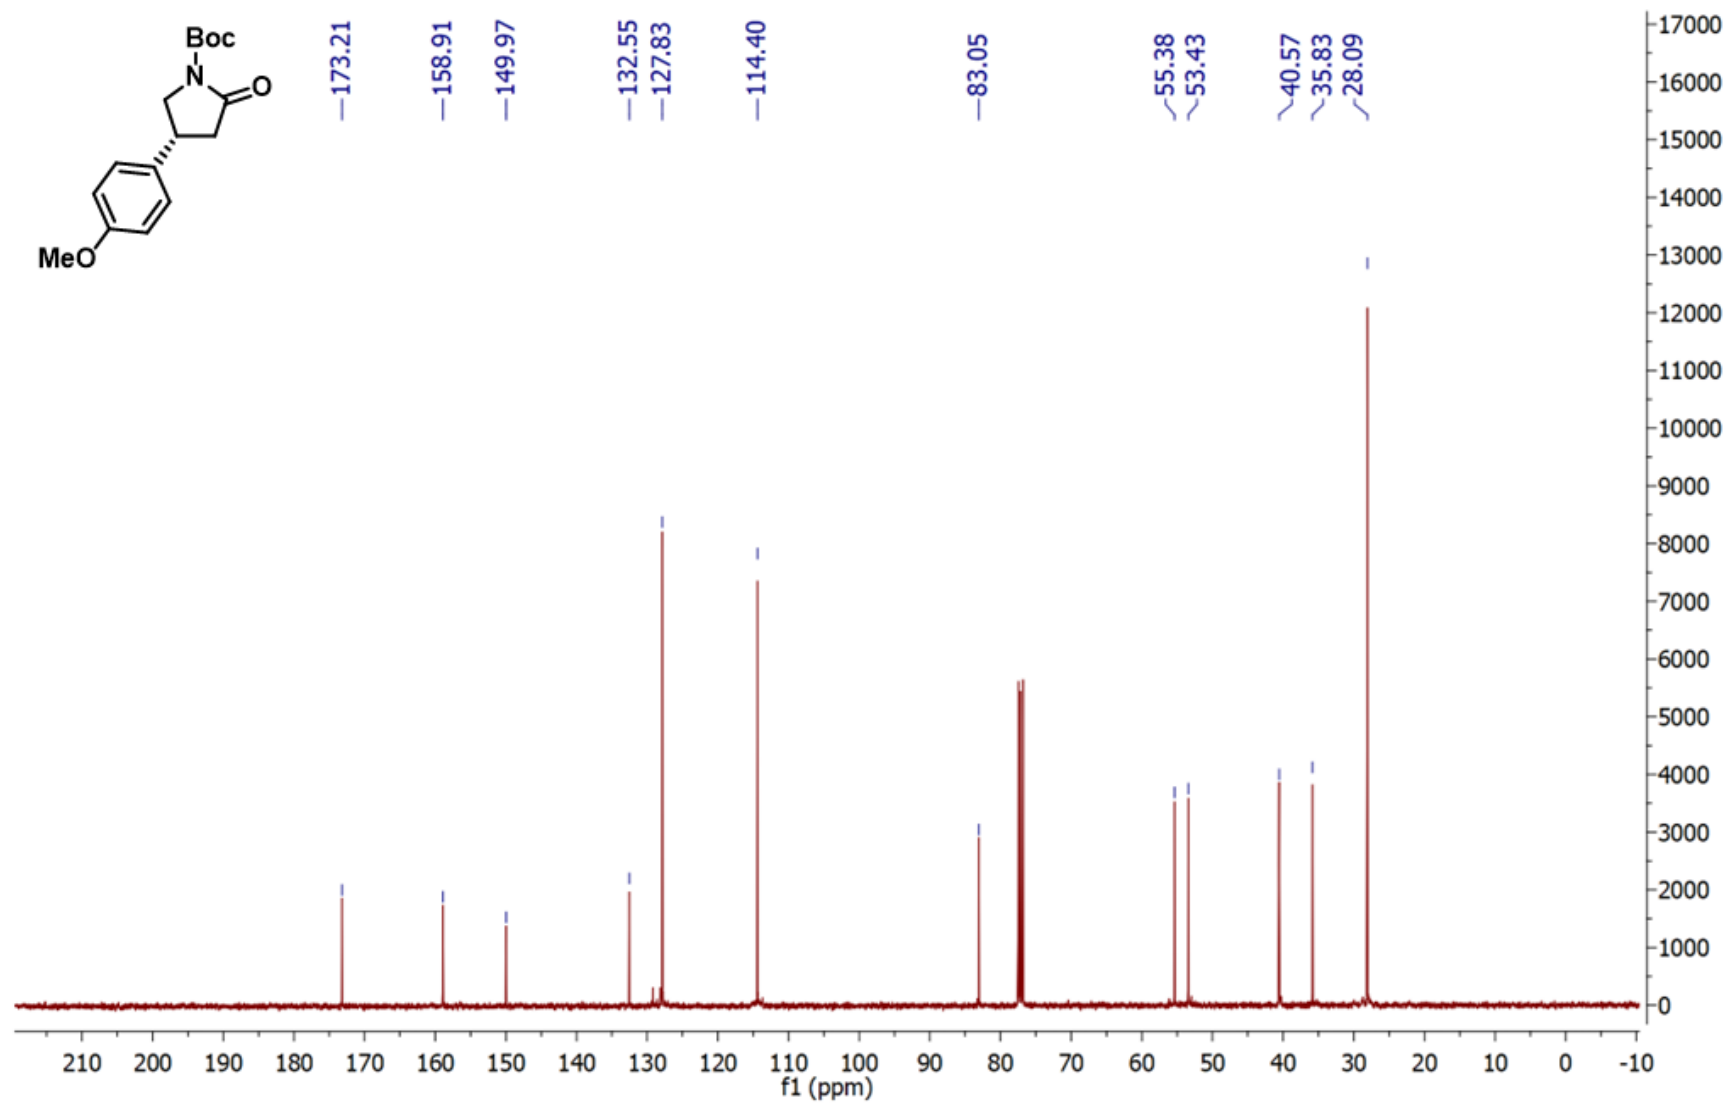

Figure SI13: <sup>13</sup>C NMR of compound 4ac.

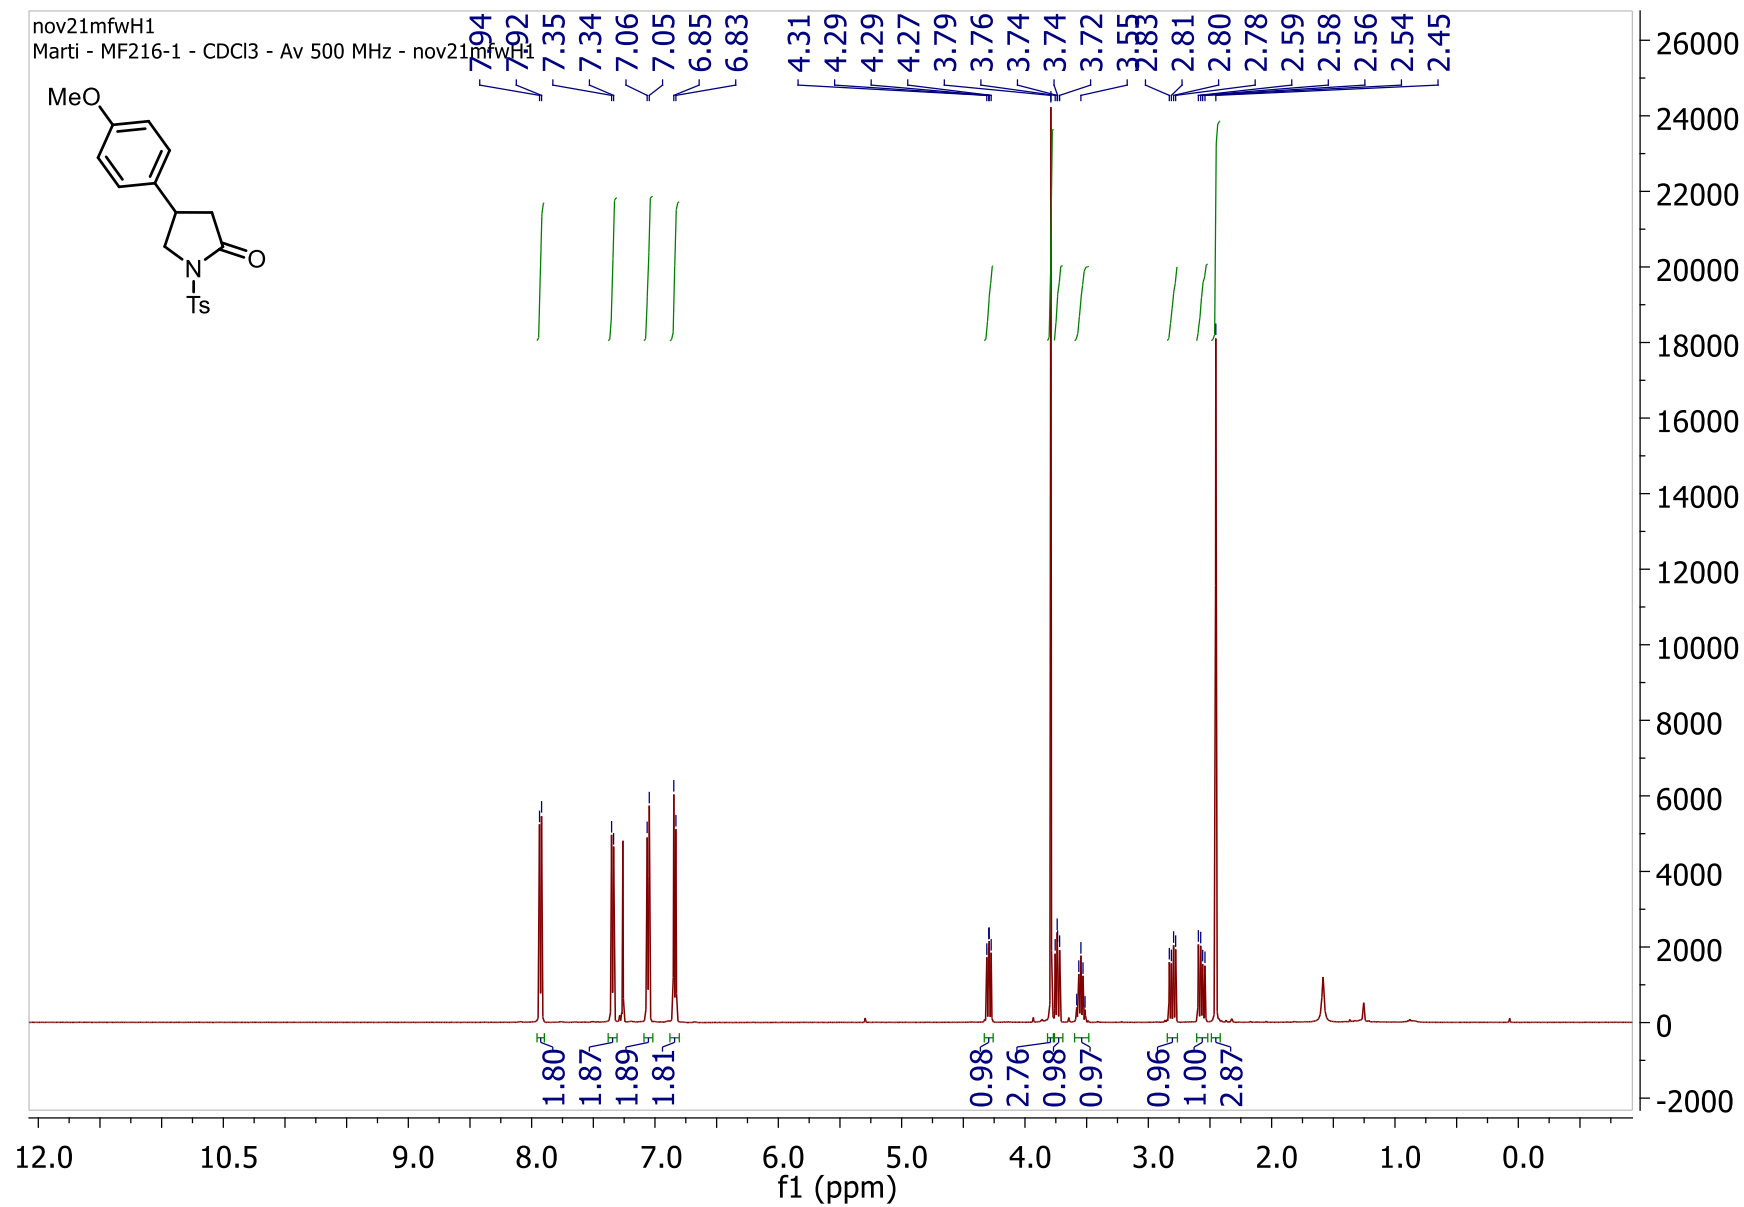

**Figure SI14:**  $^1\text{H}$  NMR of compound **4ba**.

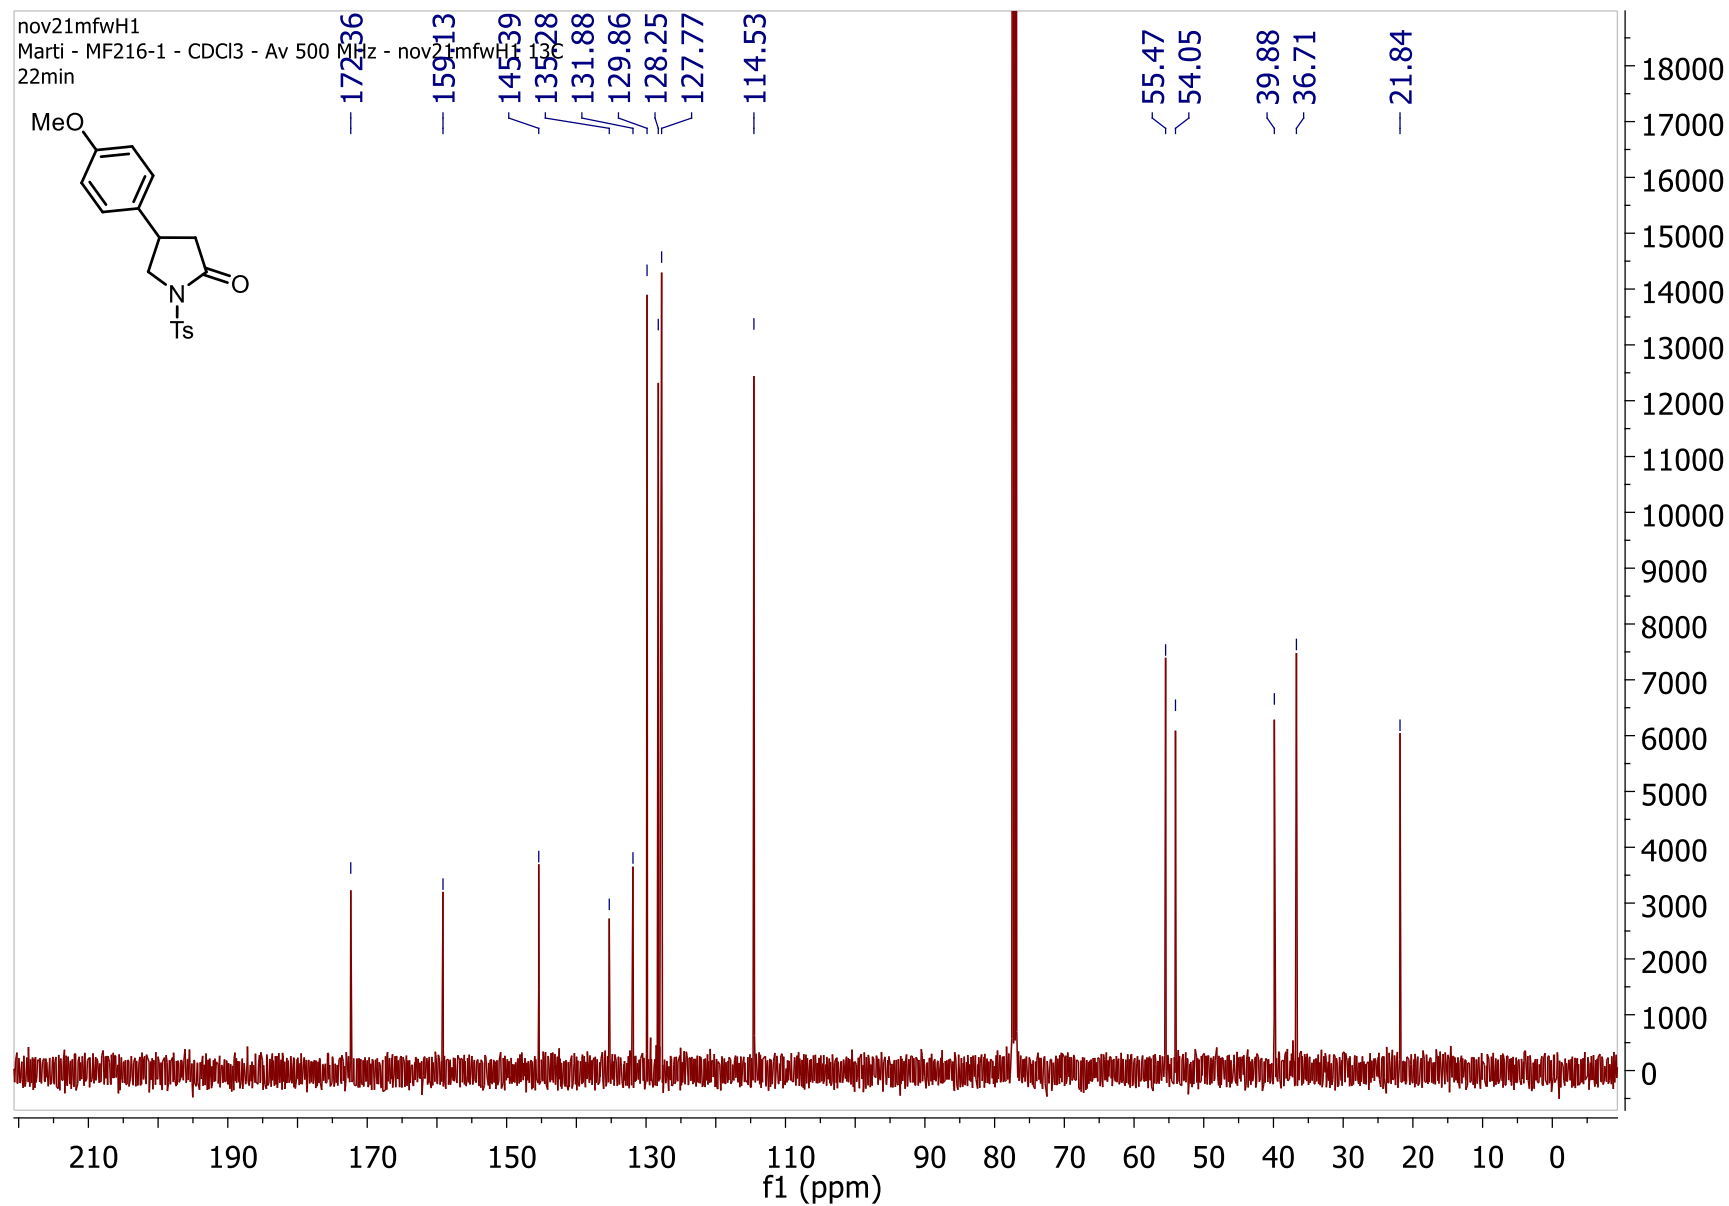

**Figure SI15:**  $^{13}\text{C}$  NMR of compound **4ba**.



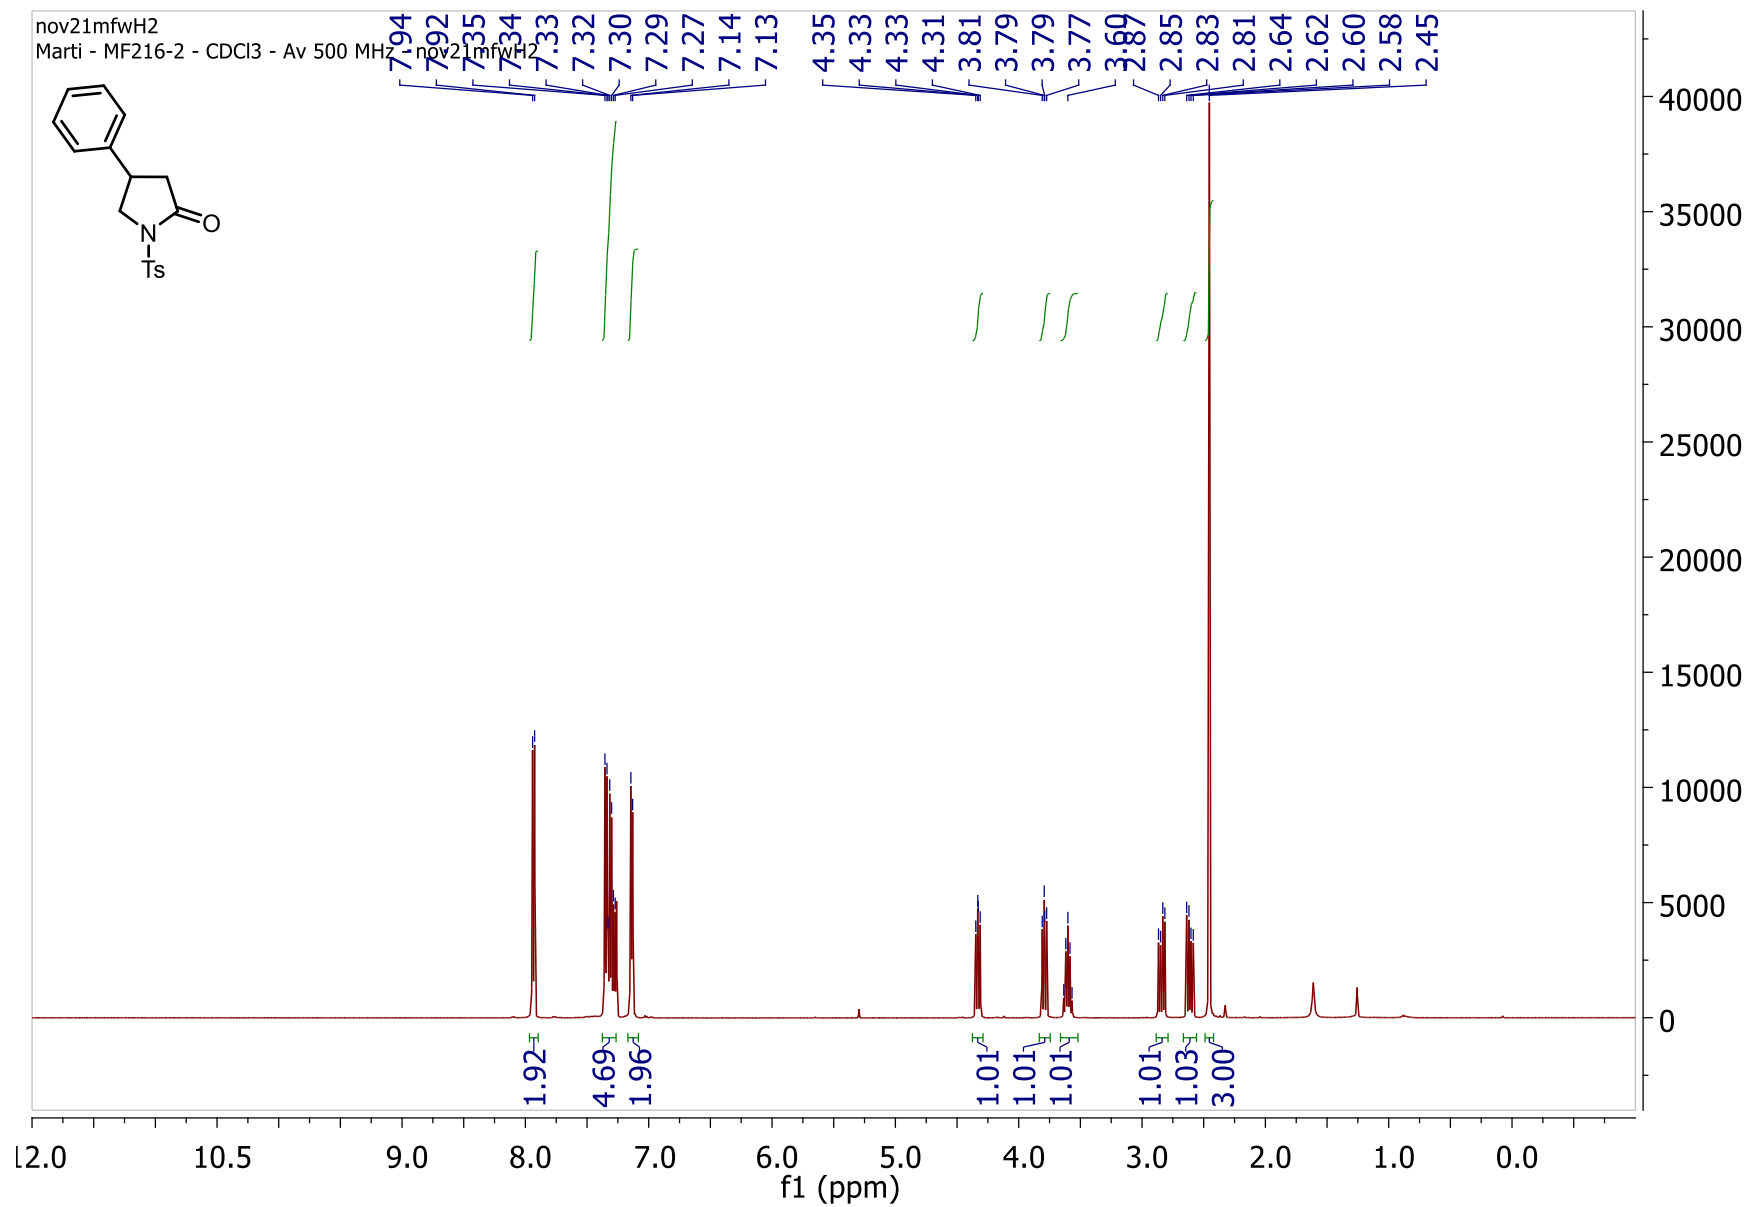

Figure SI16:  $^1\text{H}$  NMR of compound 4bb.

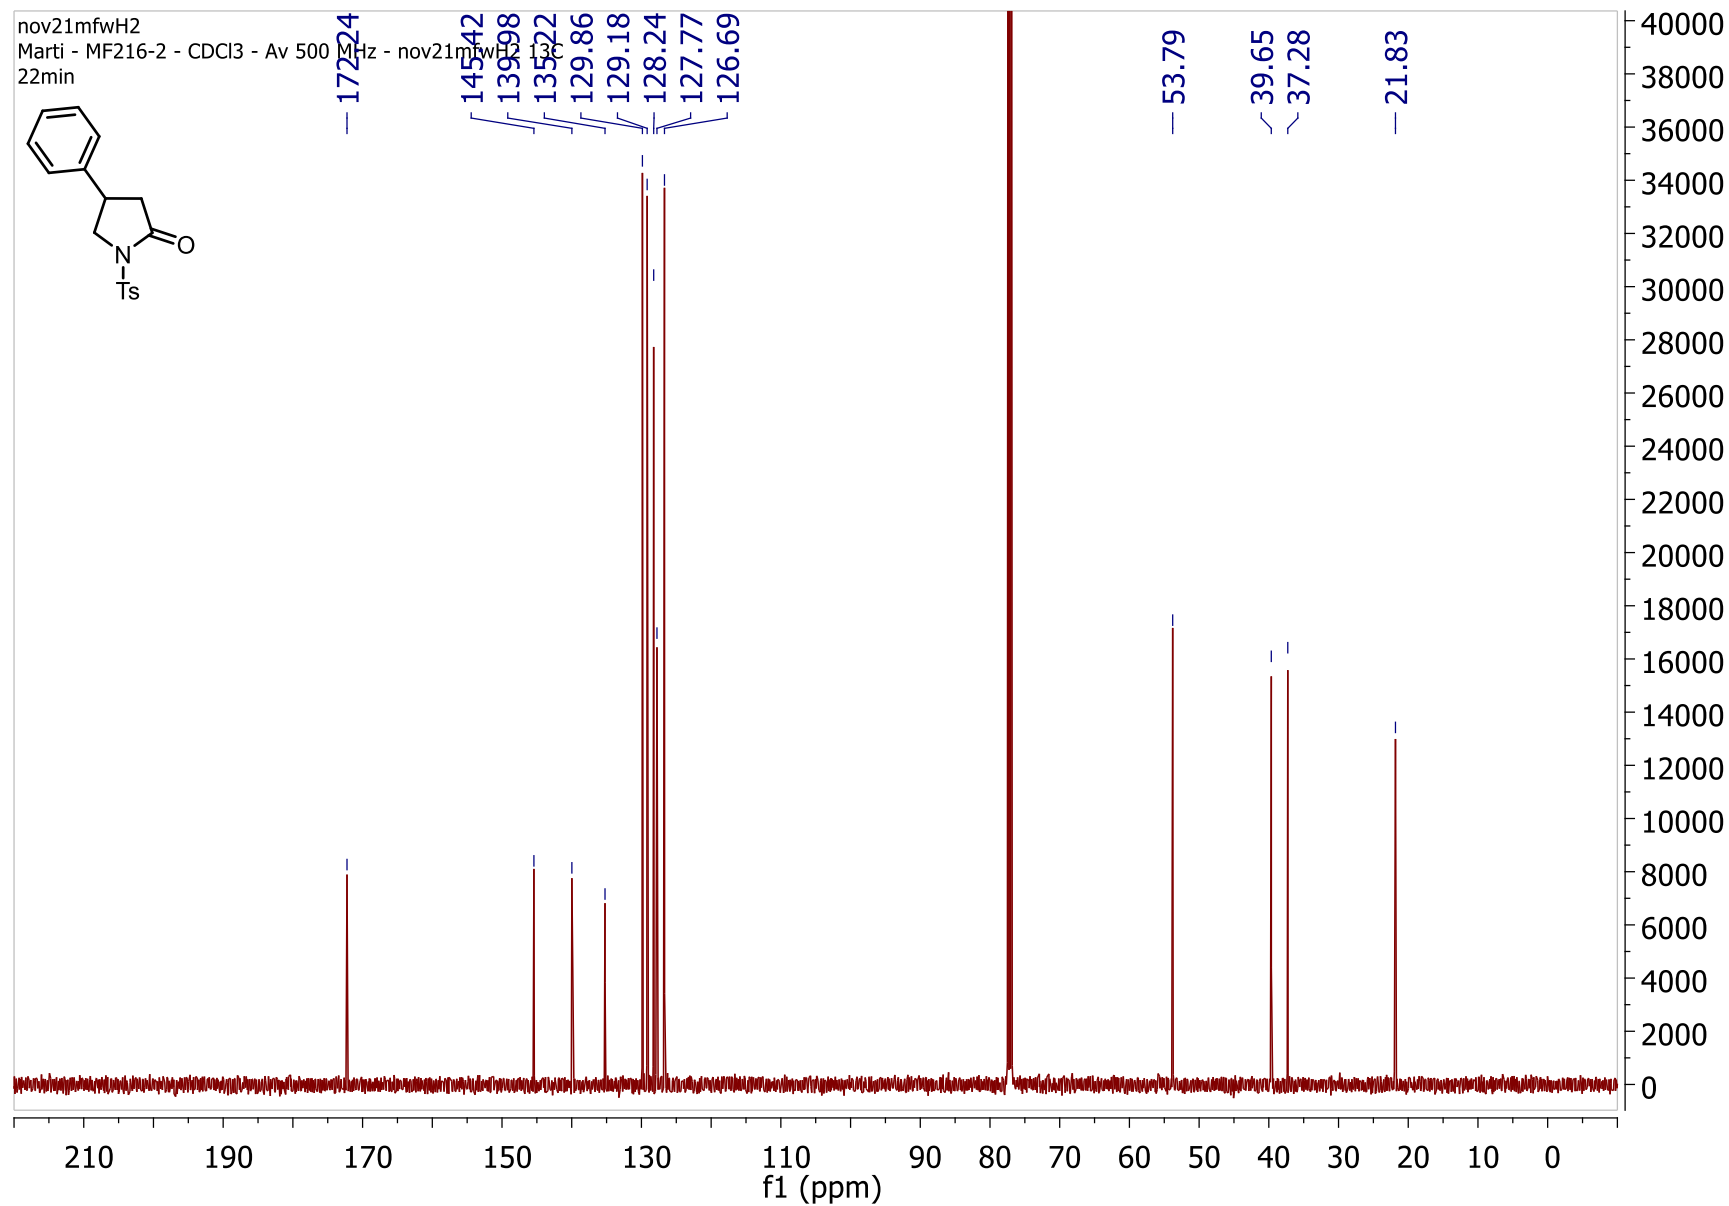

**Figure SI17:**  $^{13}\text{C}$  NMR of compound **4bb**.

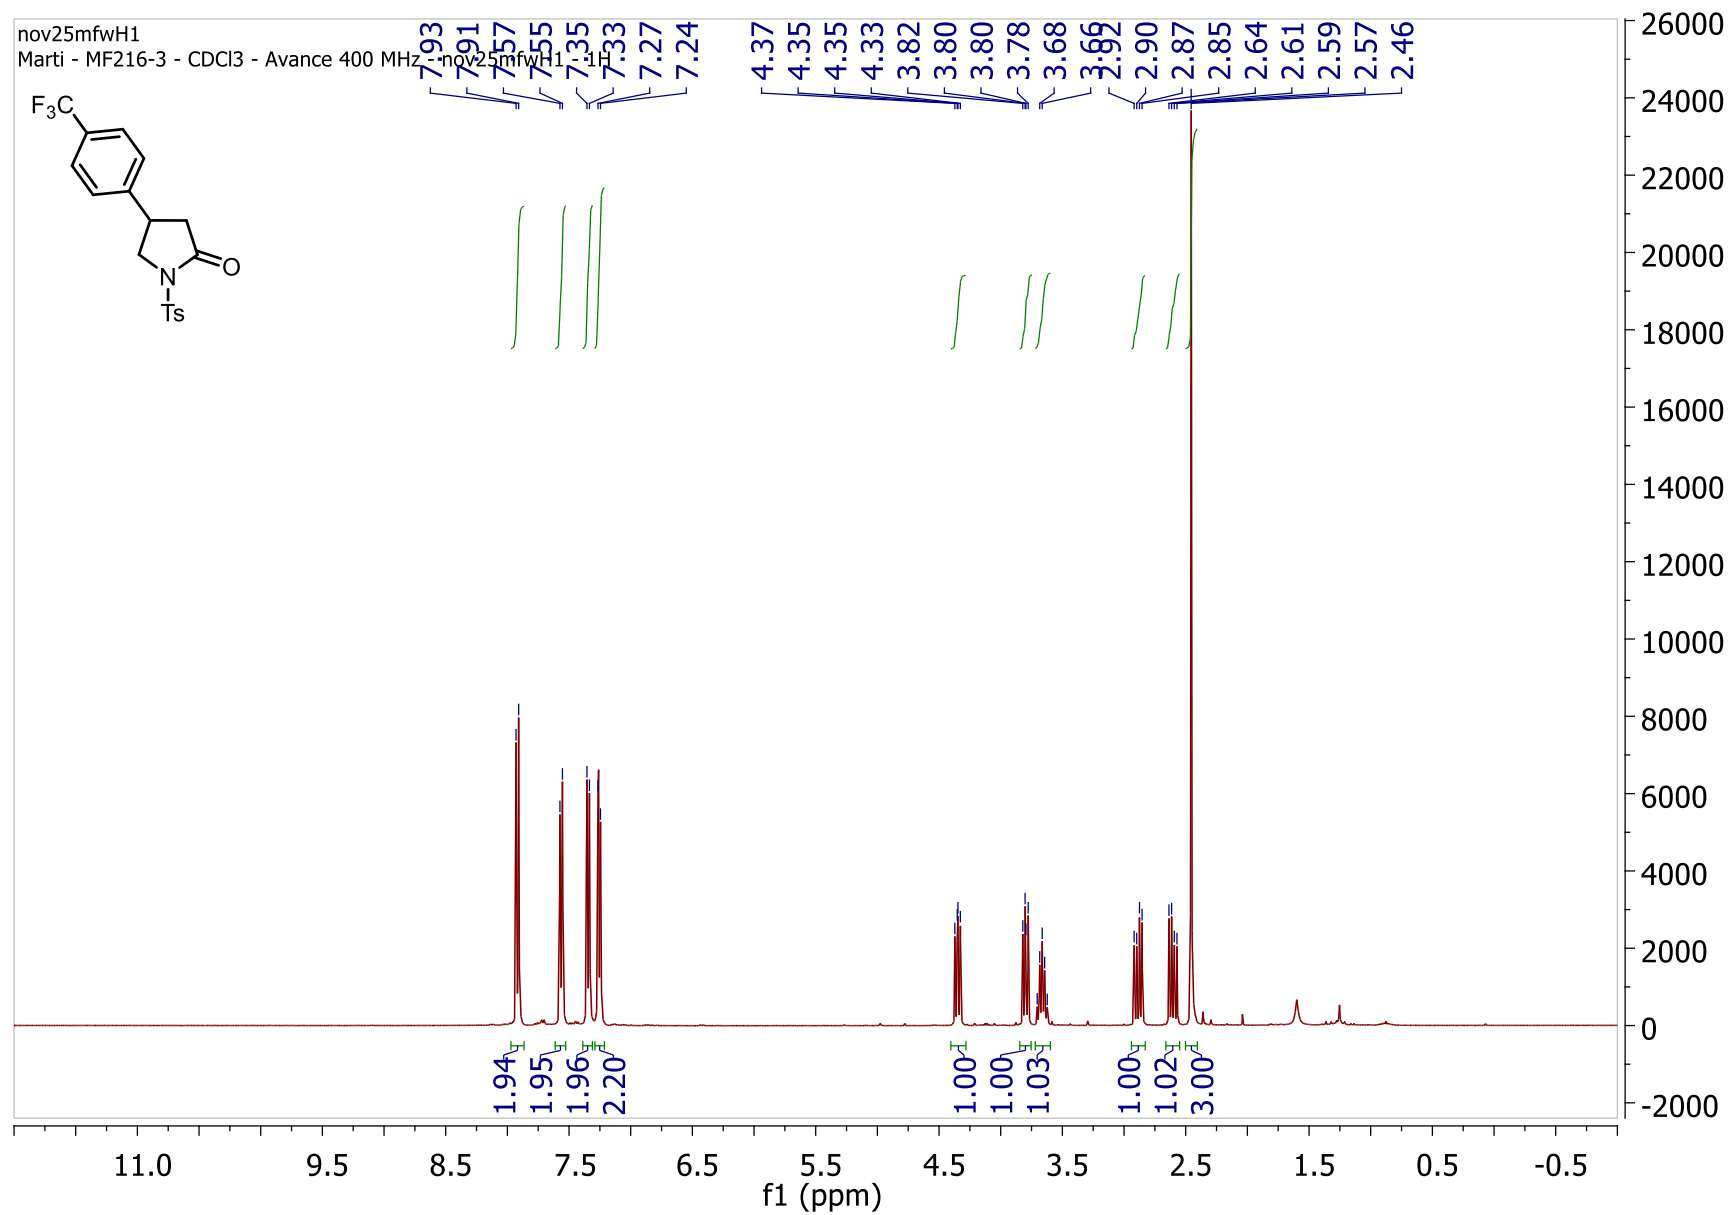

Figure SI18:  $^1\text{H}$  NMR of compound **4bc**.

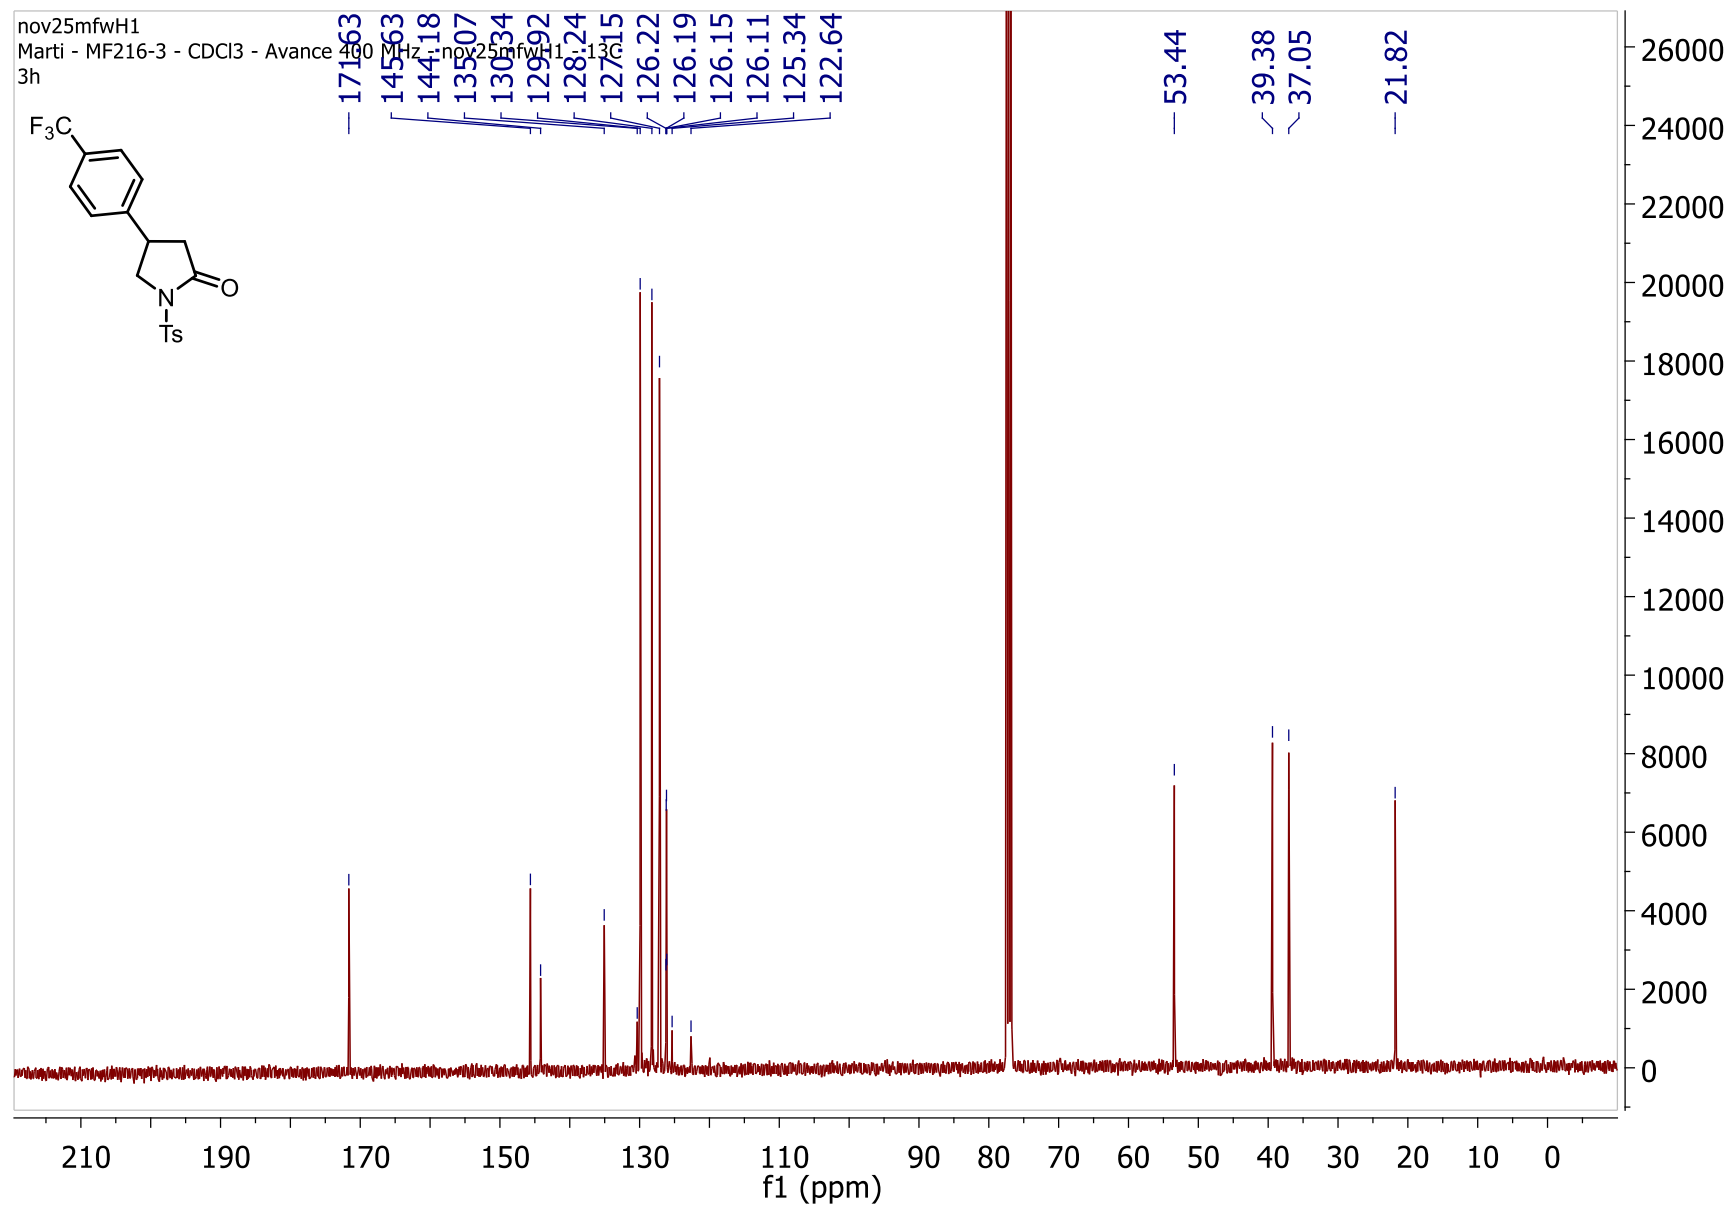

**Figure SI19:**  $^{13}\text{C}$  NMR of compound **4bc**.

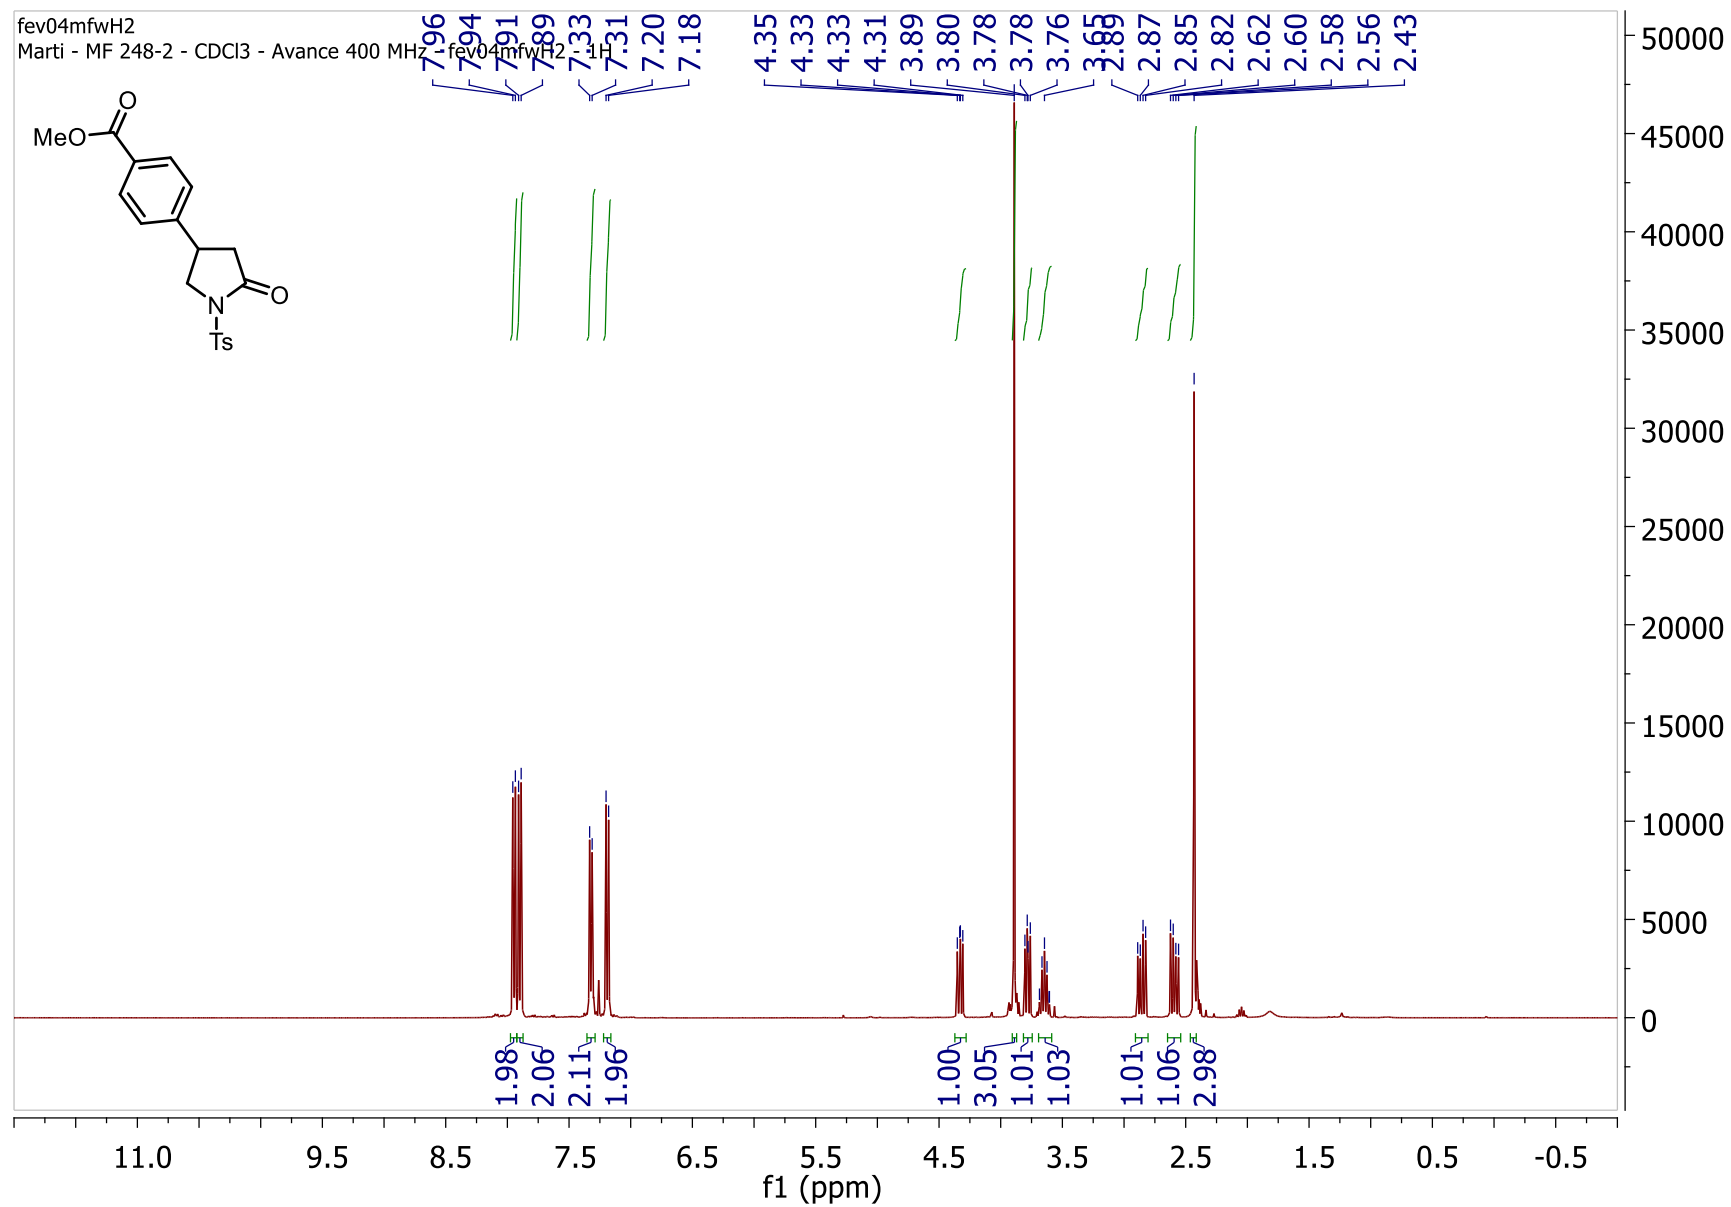

**Figure SI20:** <sup>1</sup>H NMR of compound **4bd**.

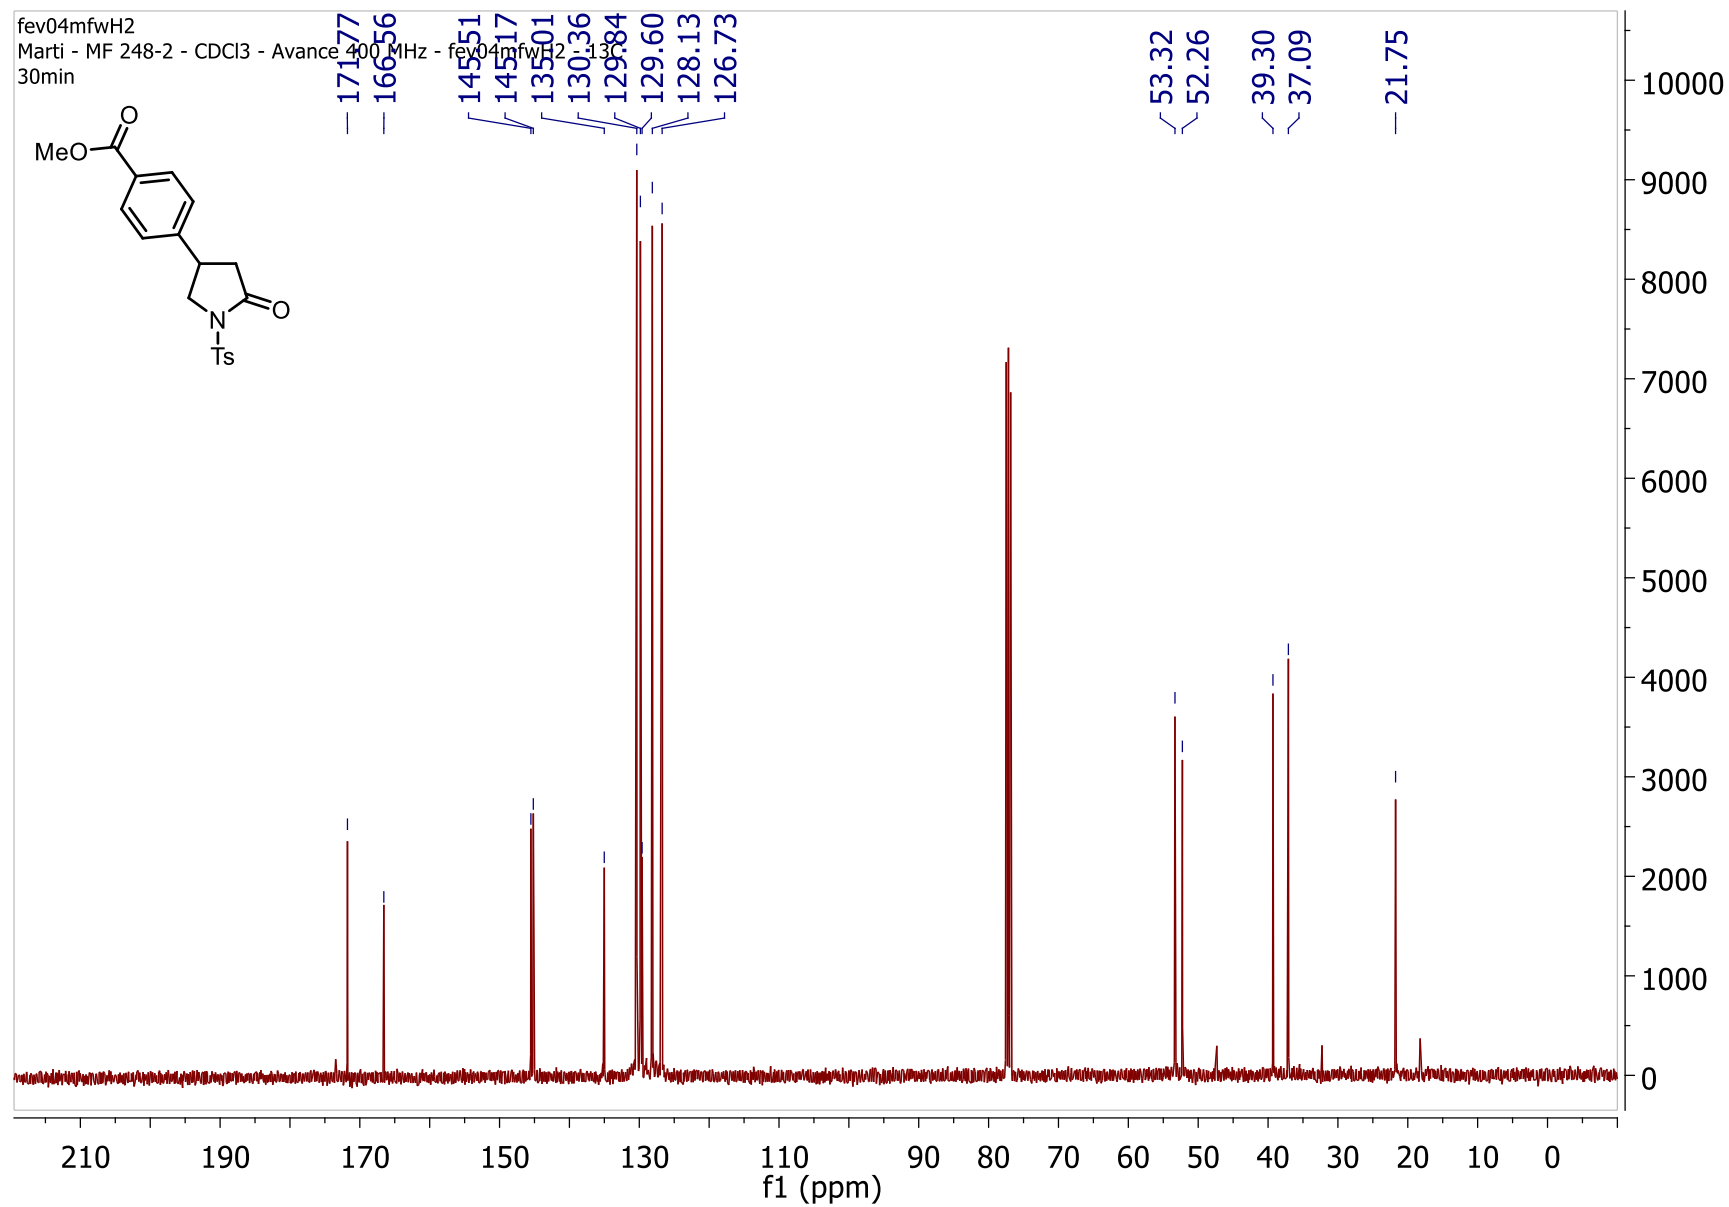

**Figure SI21:** <sup>13</sup>C NMR of compound **4bd**.

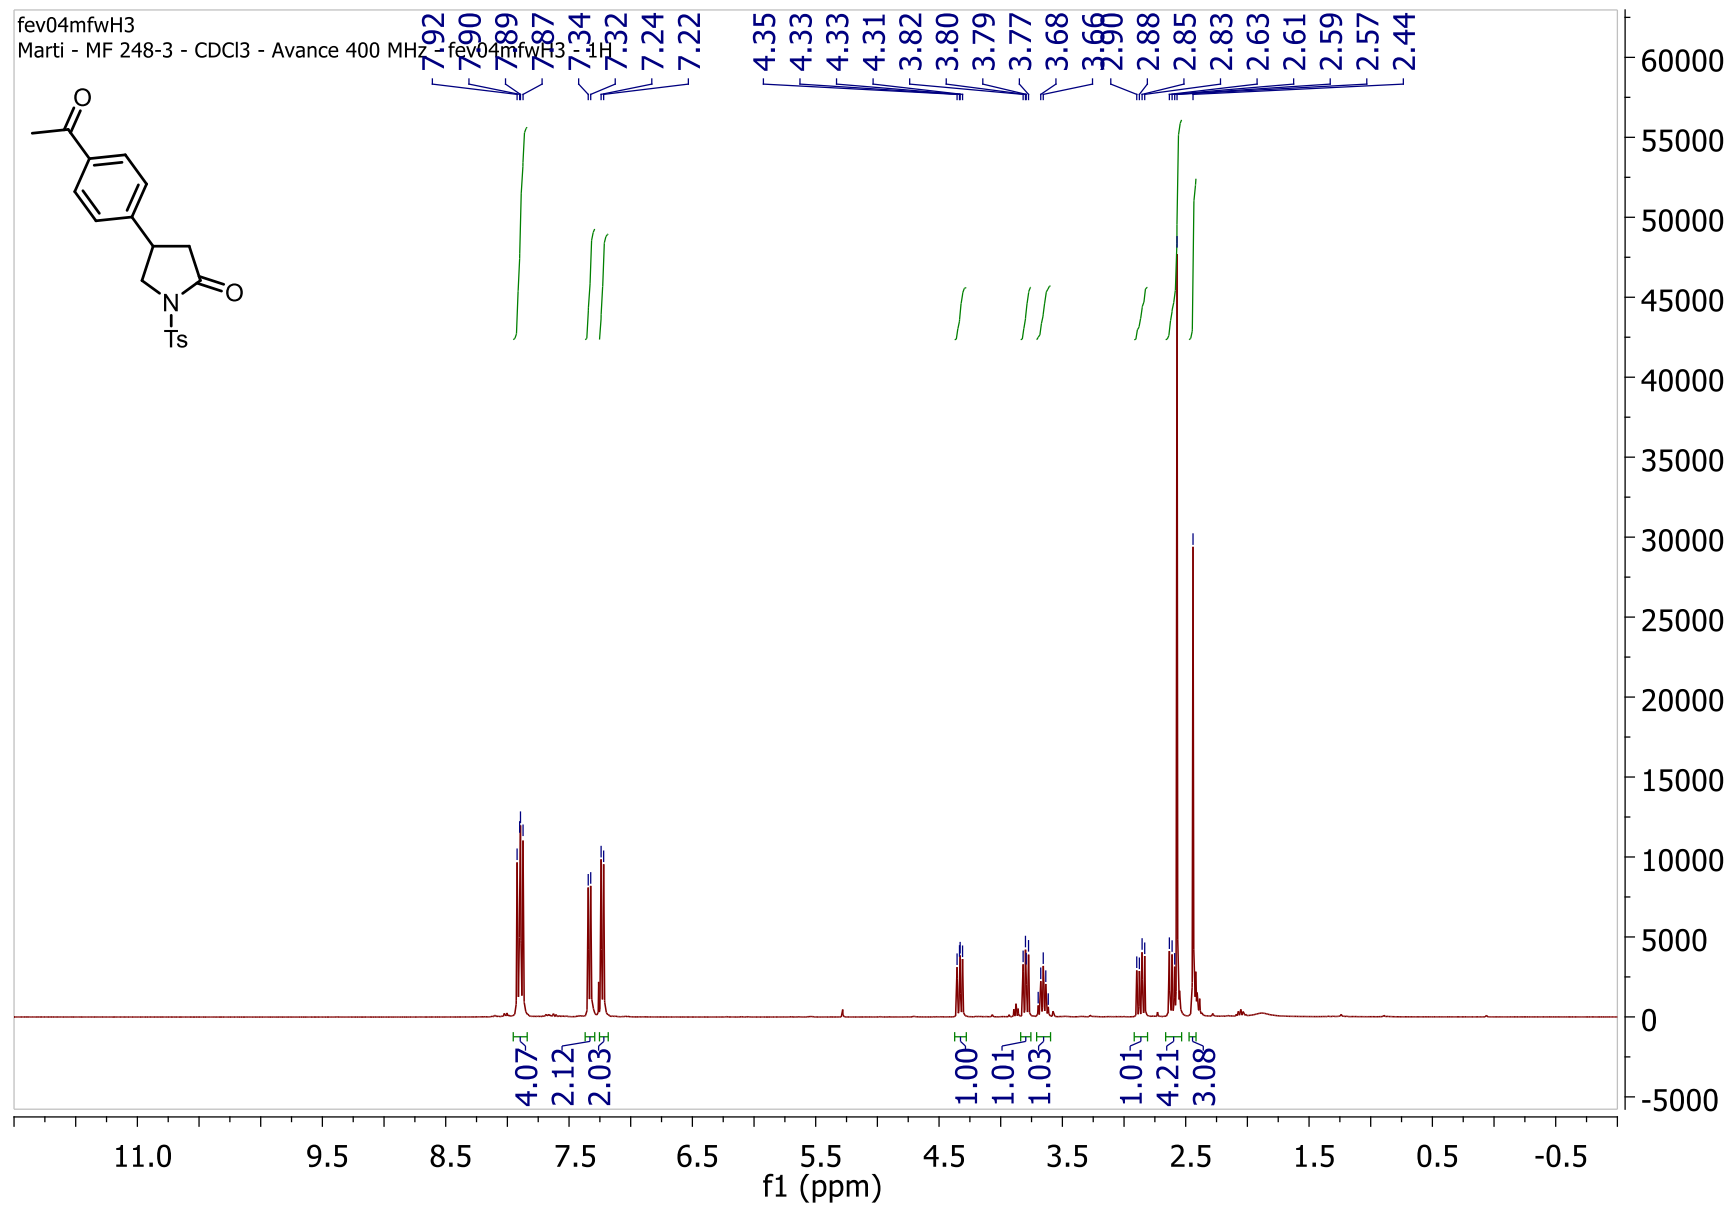

**Figure SI22:** <sup>1</sup>H NMR of compound **4be**.



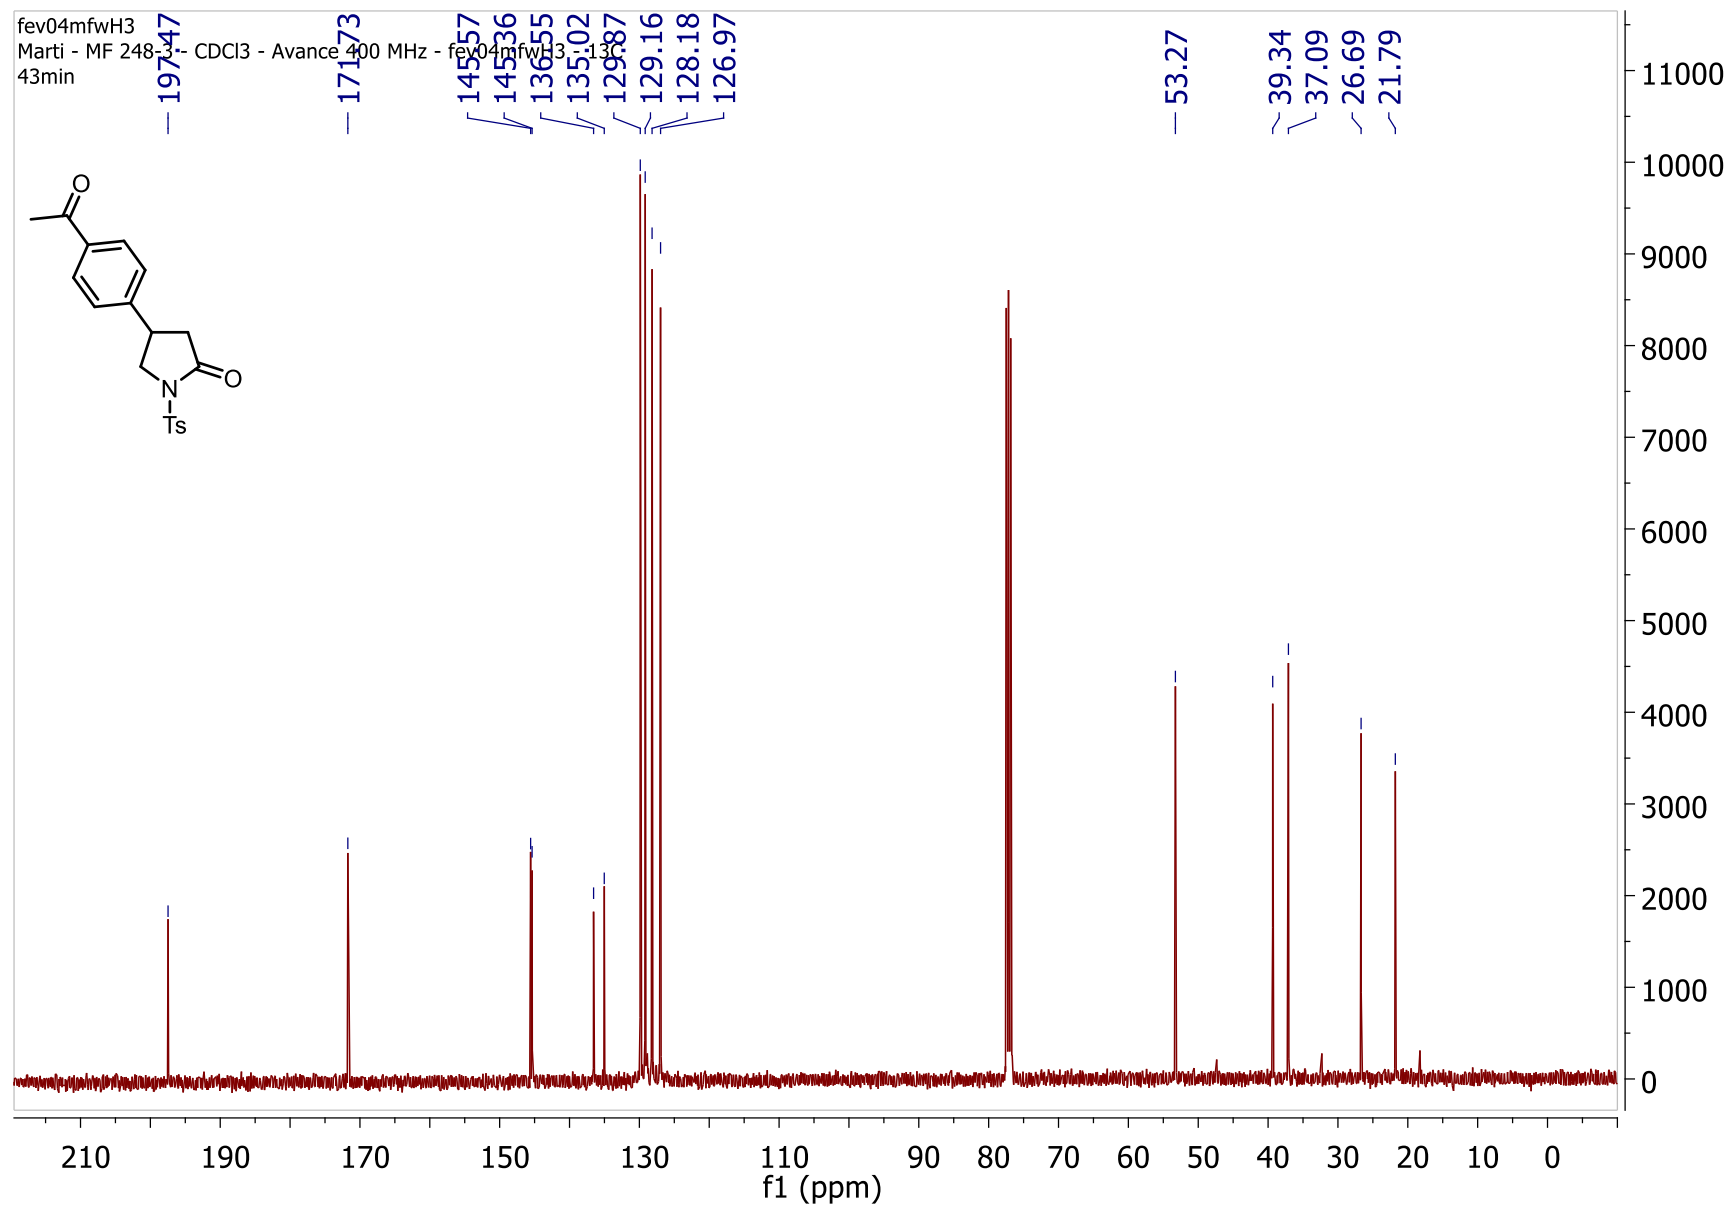

**Figure SI23:**  $^{13}\text{C}$  NMR of compound **4be**.

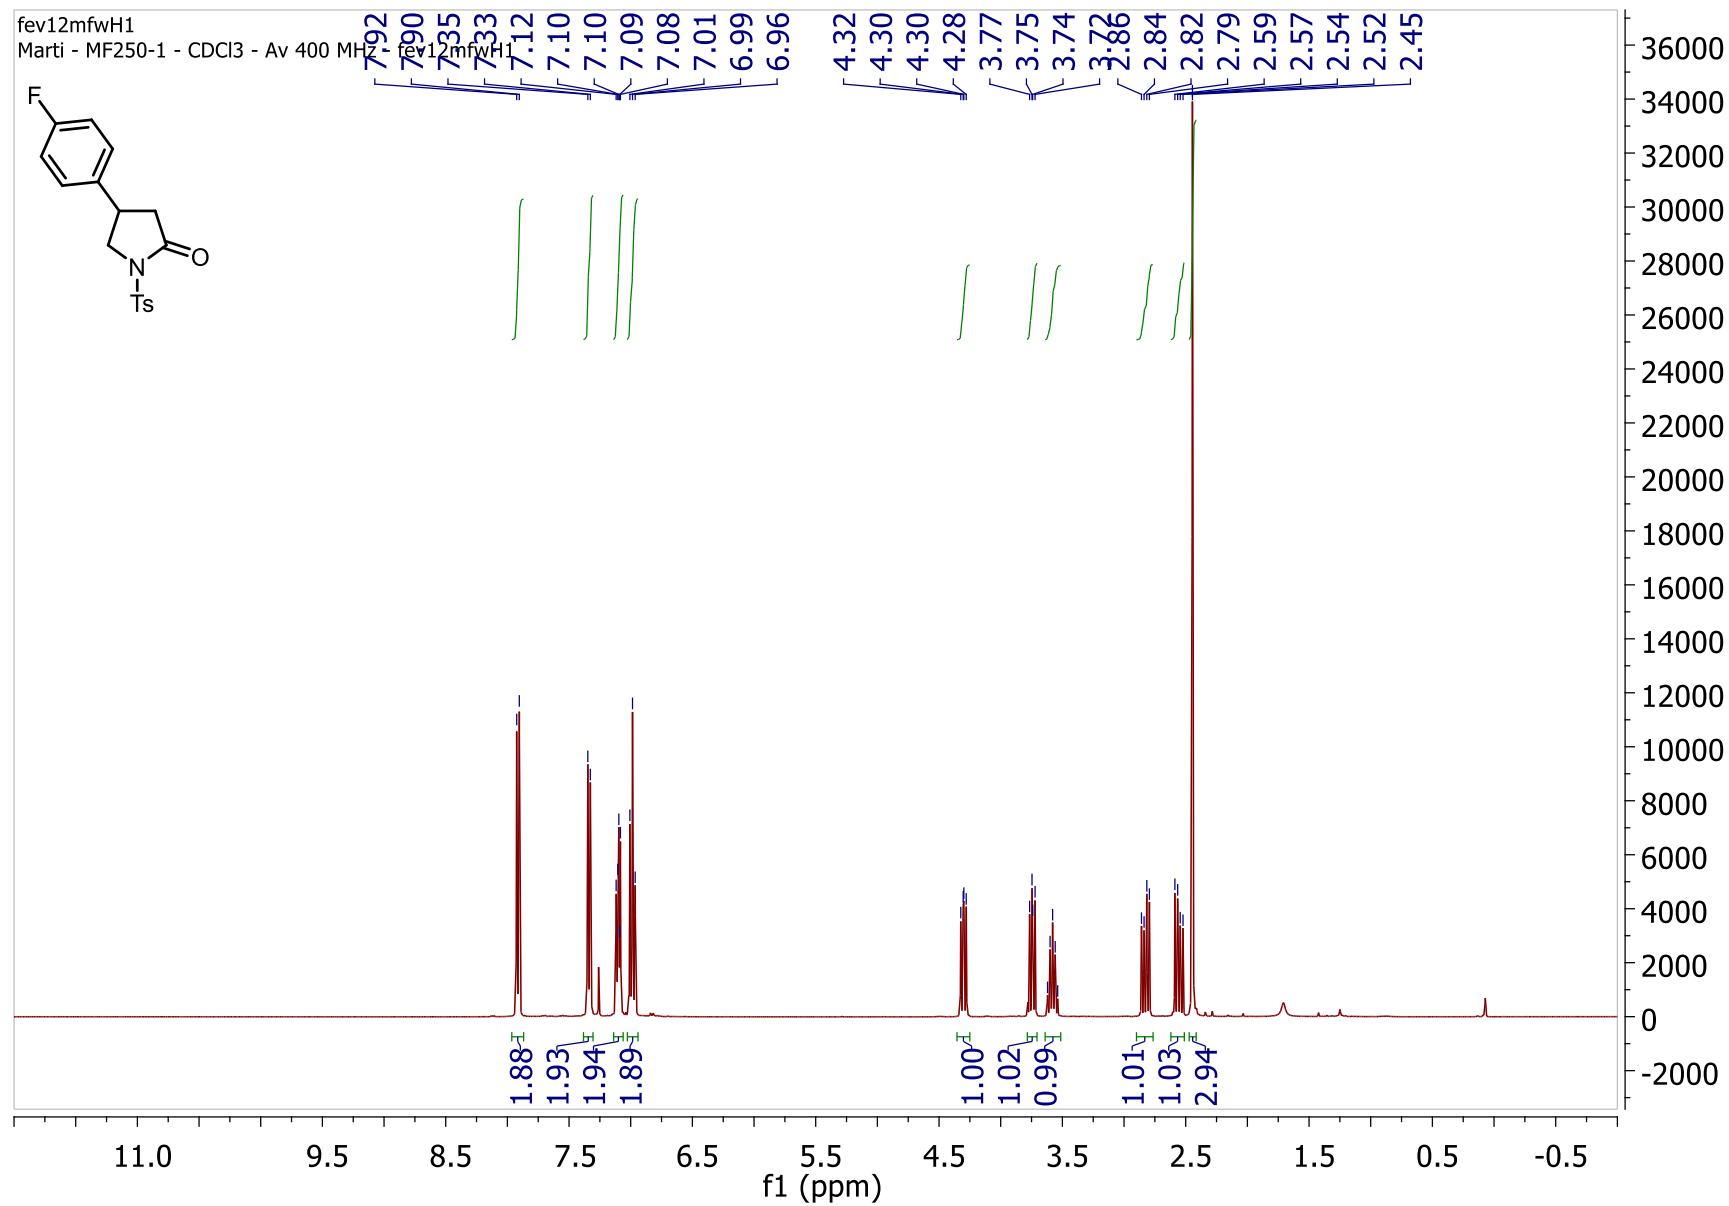

**Figure SI24:**  $^1\text{H}$  NMR of compound **4bf**.

out16agoH1

Amaldo - AGO 152 A2 - CDCl<sub>3</sub> - Avance 500 MHz - out16agoH1 - <sup>1</sup>H

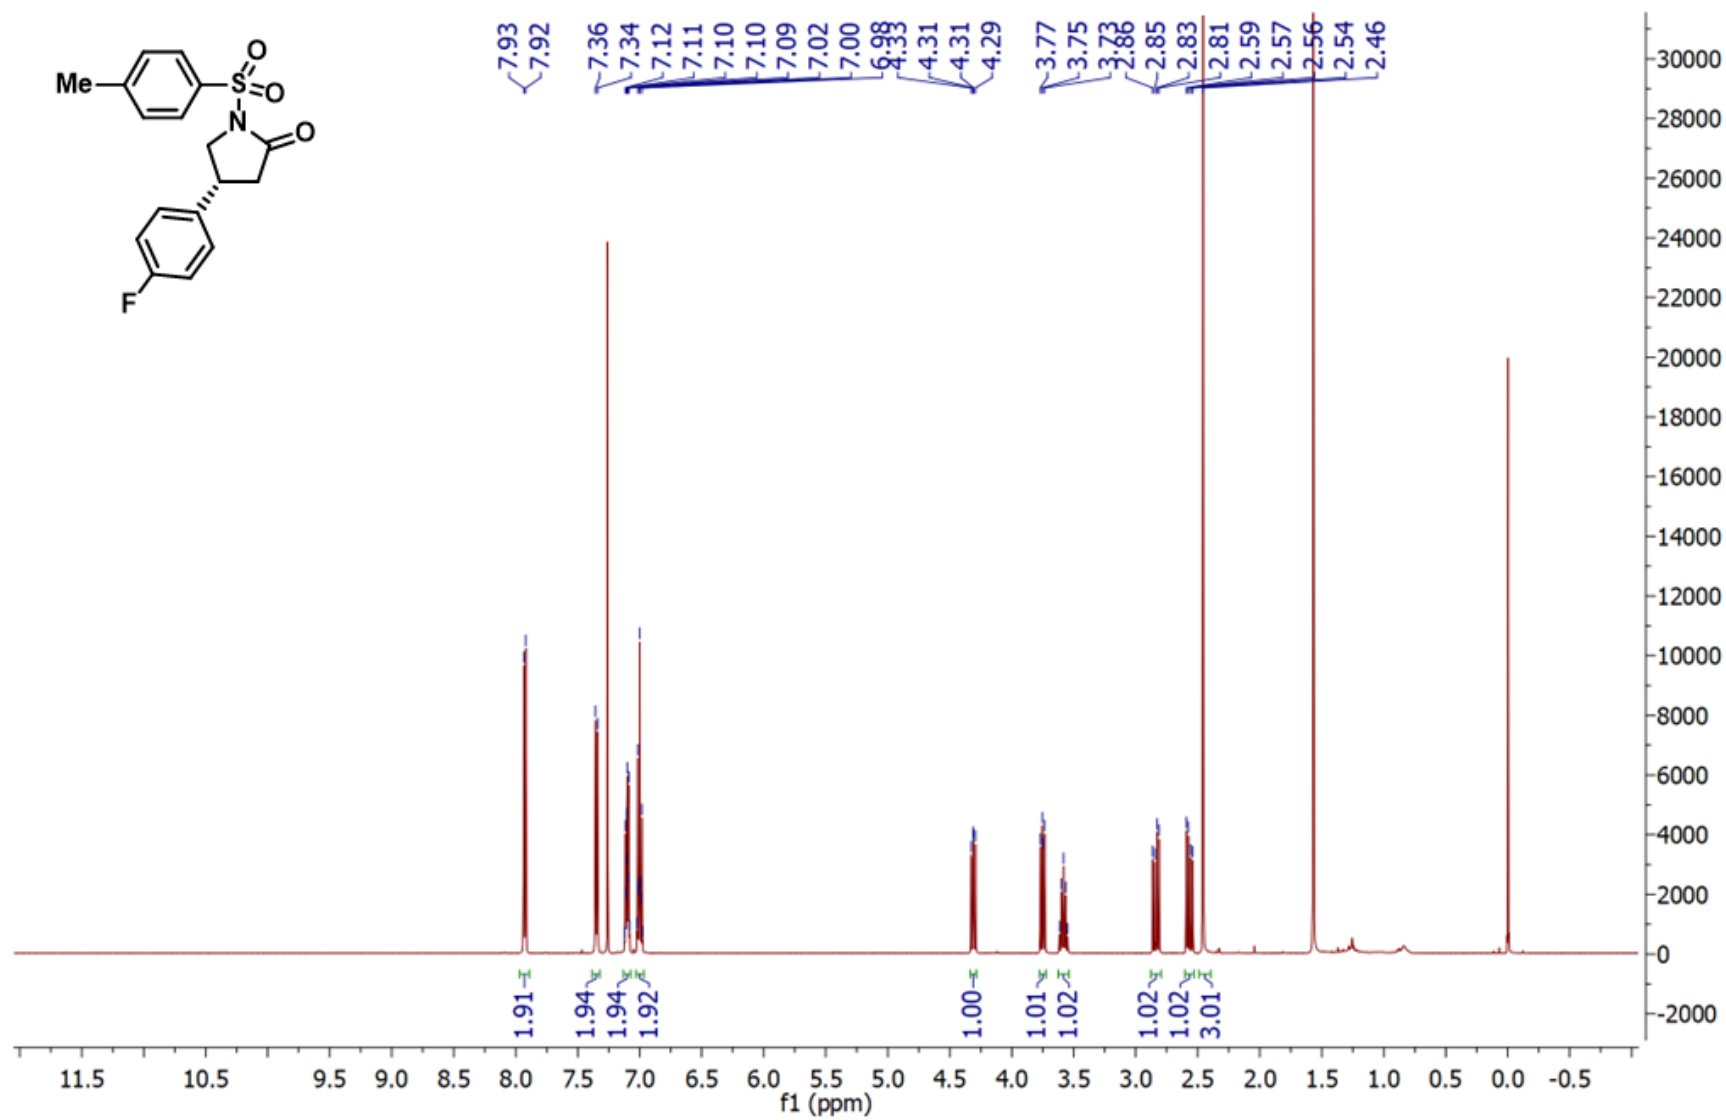

Figure SI25: <sup>1</sup>H NMR of compound 4bf.

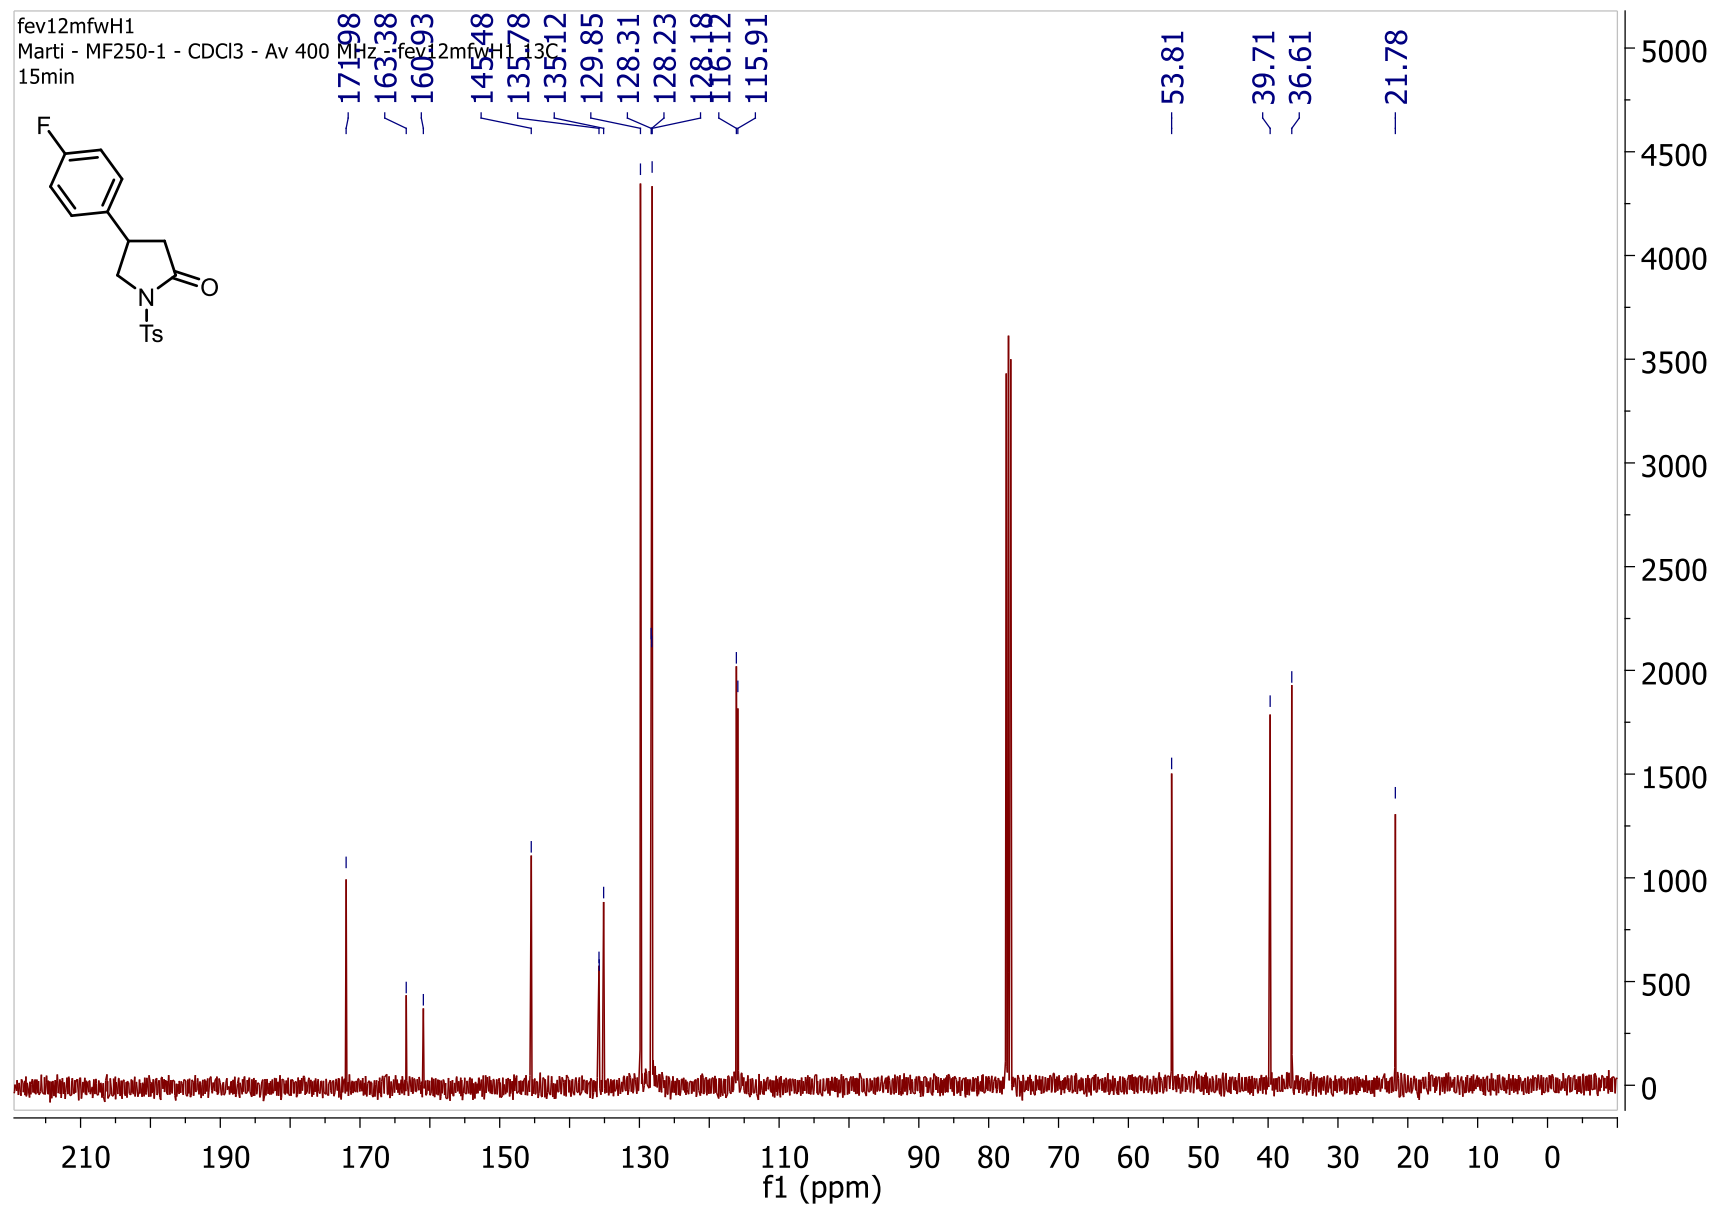

**Figure SI26:** <sup>13</sup>C NMR of compound **4bf**.

out16agoH1  
Arnaldo - AGO 152 A2 - CDCl<sub>3</sub> - Avance 500 MHz - out16agoH1 - <sup>19</sup>F

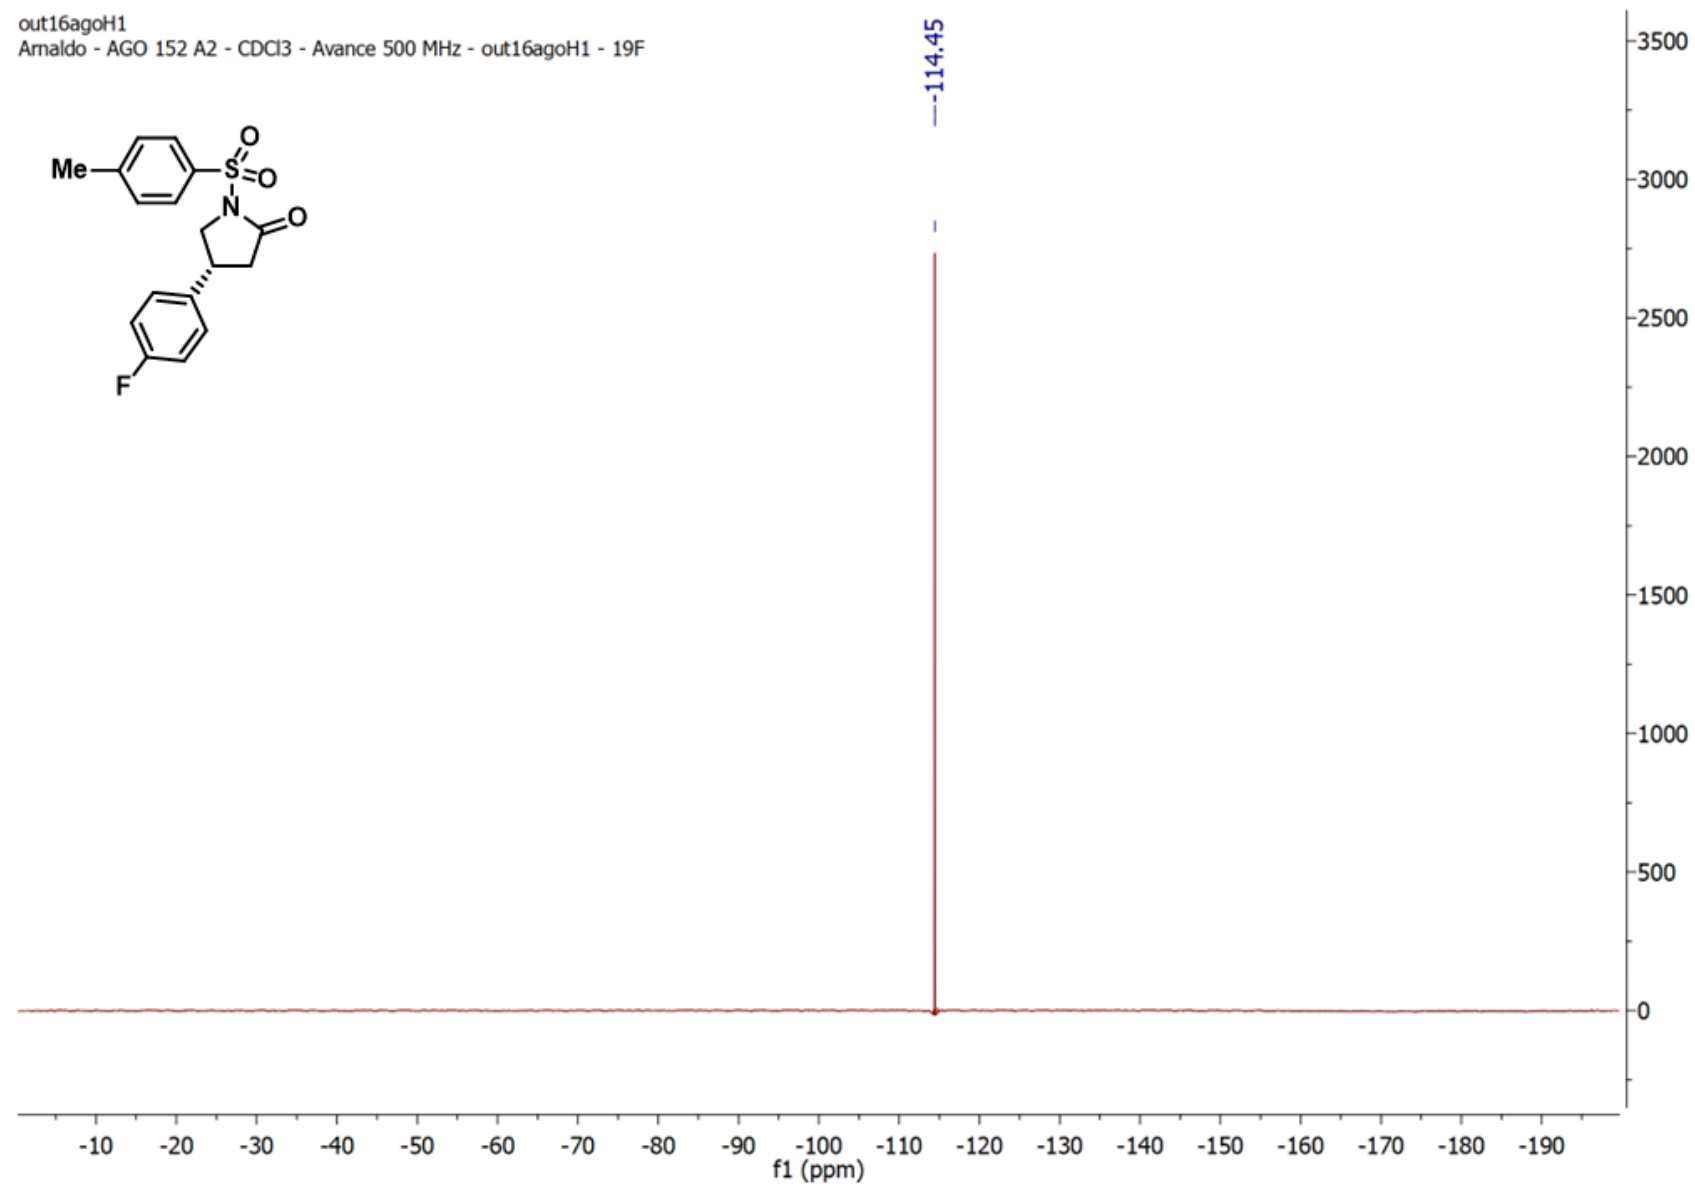

**Figure SI27:** <sup>19</sup>F NMR of compound **4bf**.

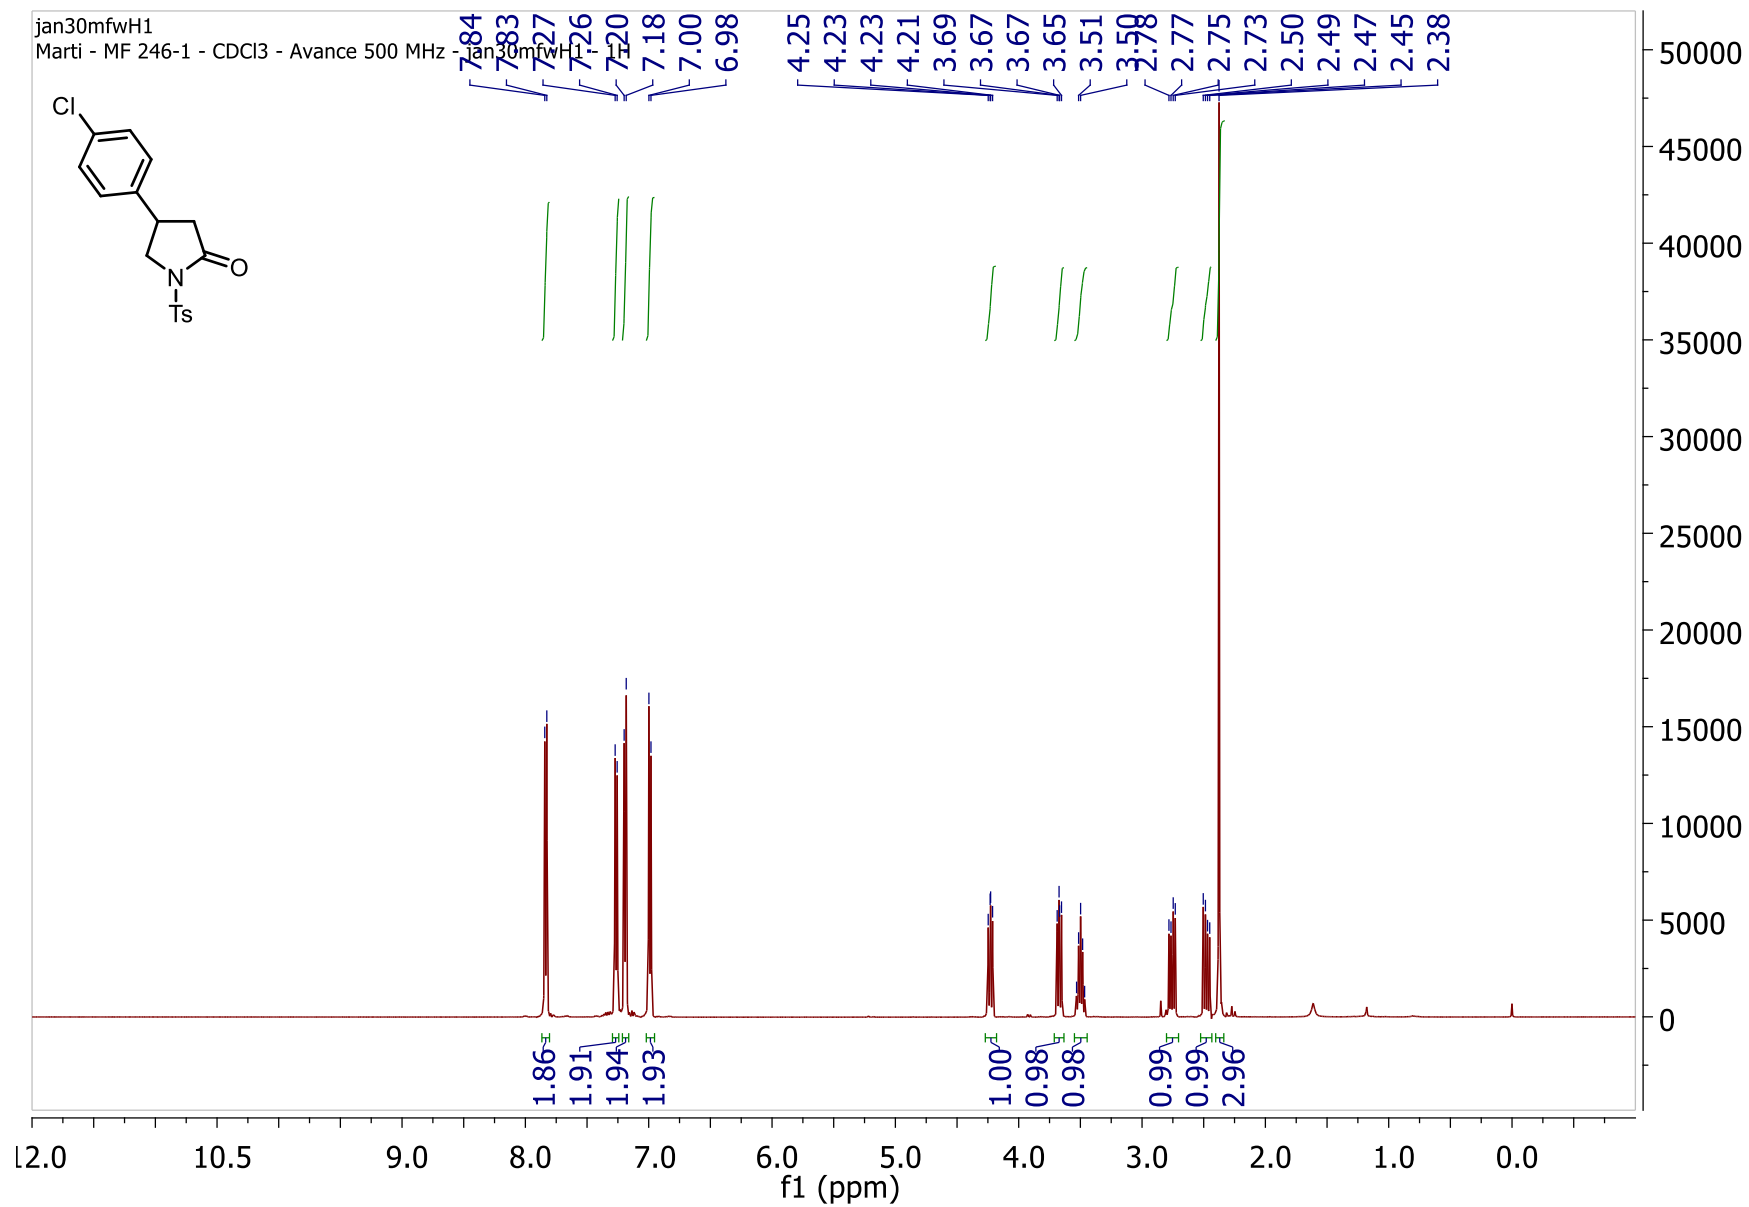

**Figure SI28:** <sup>1</sup>H NMR of compound **4bg**.

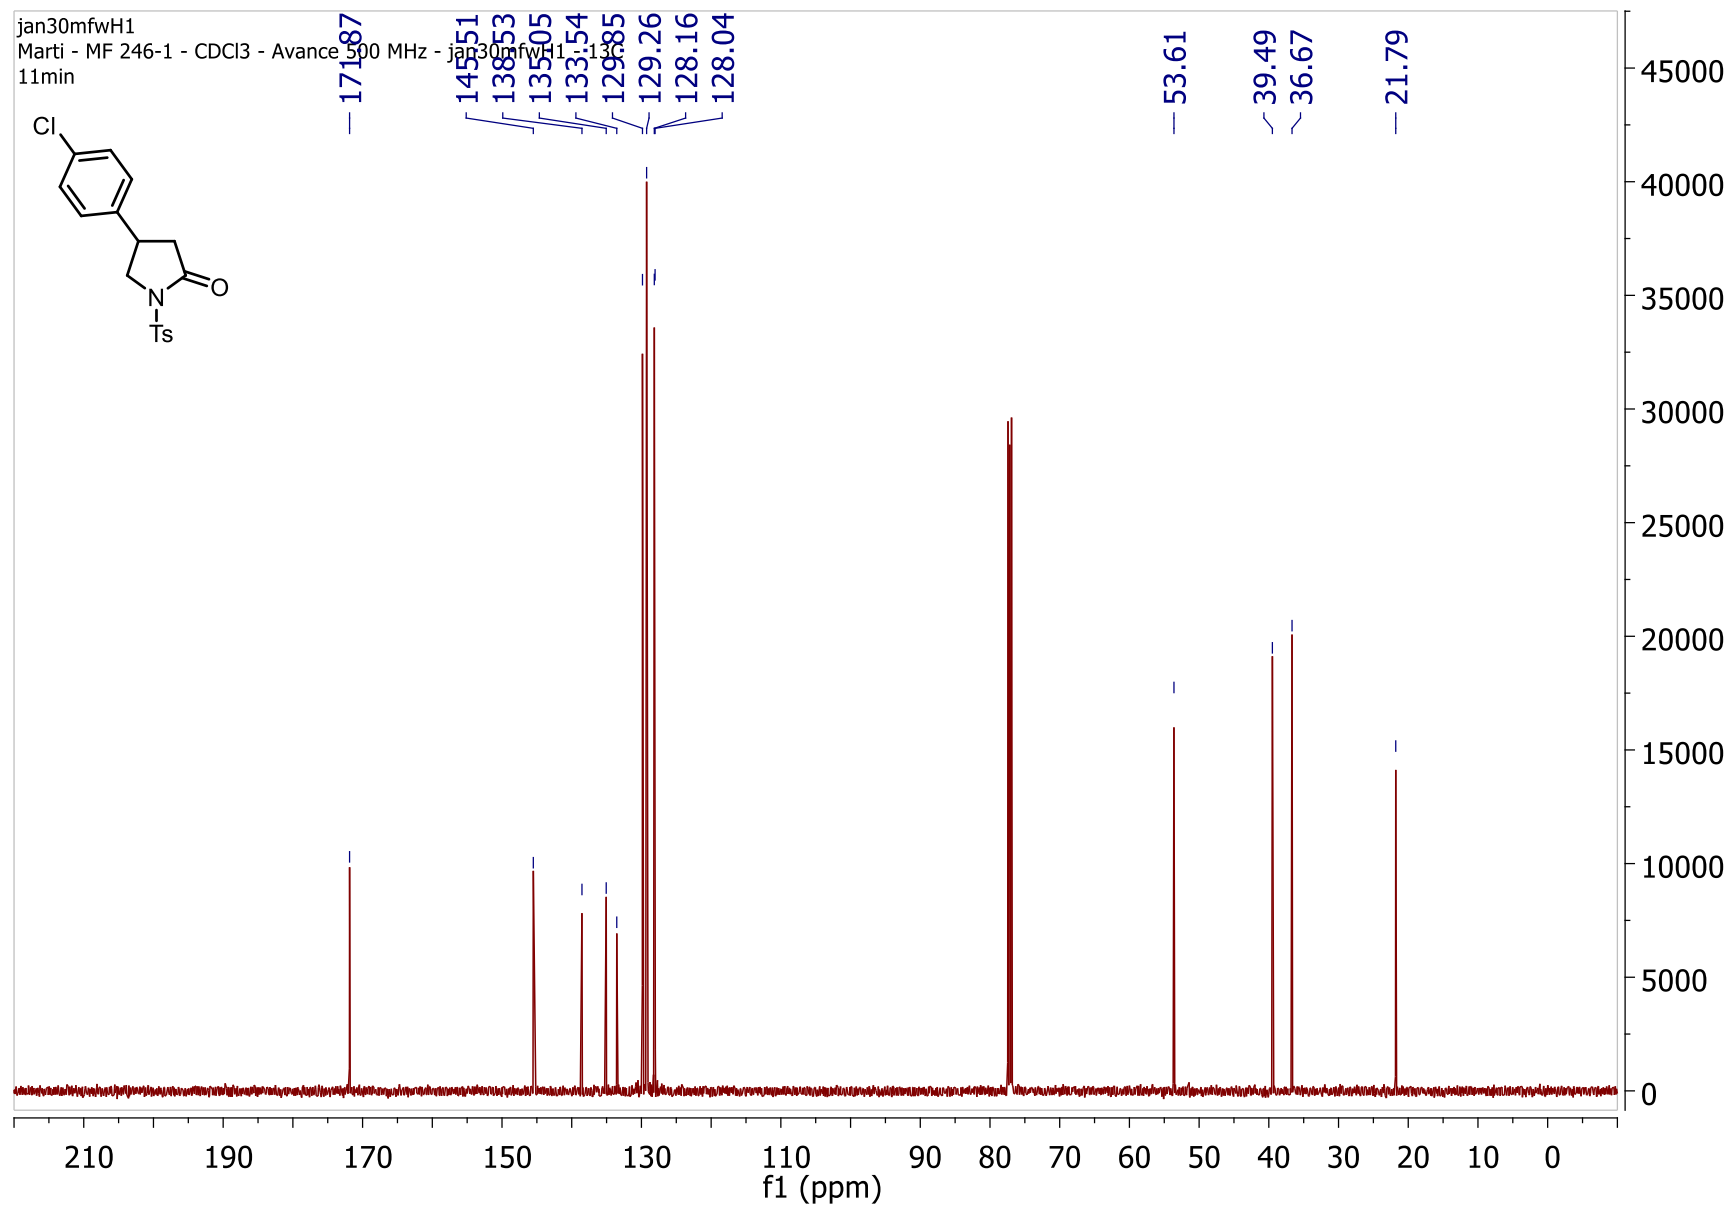

**Figure SI29:** <sup>13</sup>C NMR of compound **4bg**



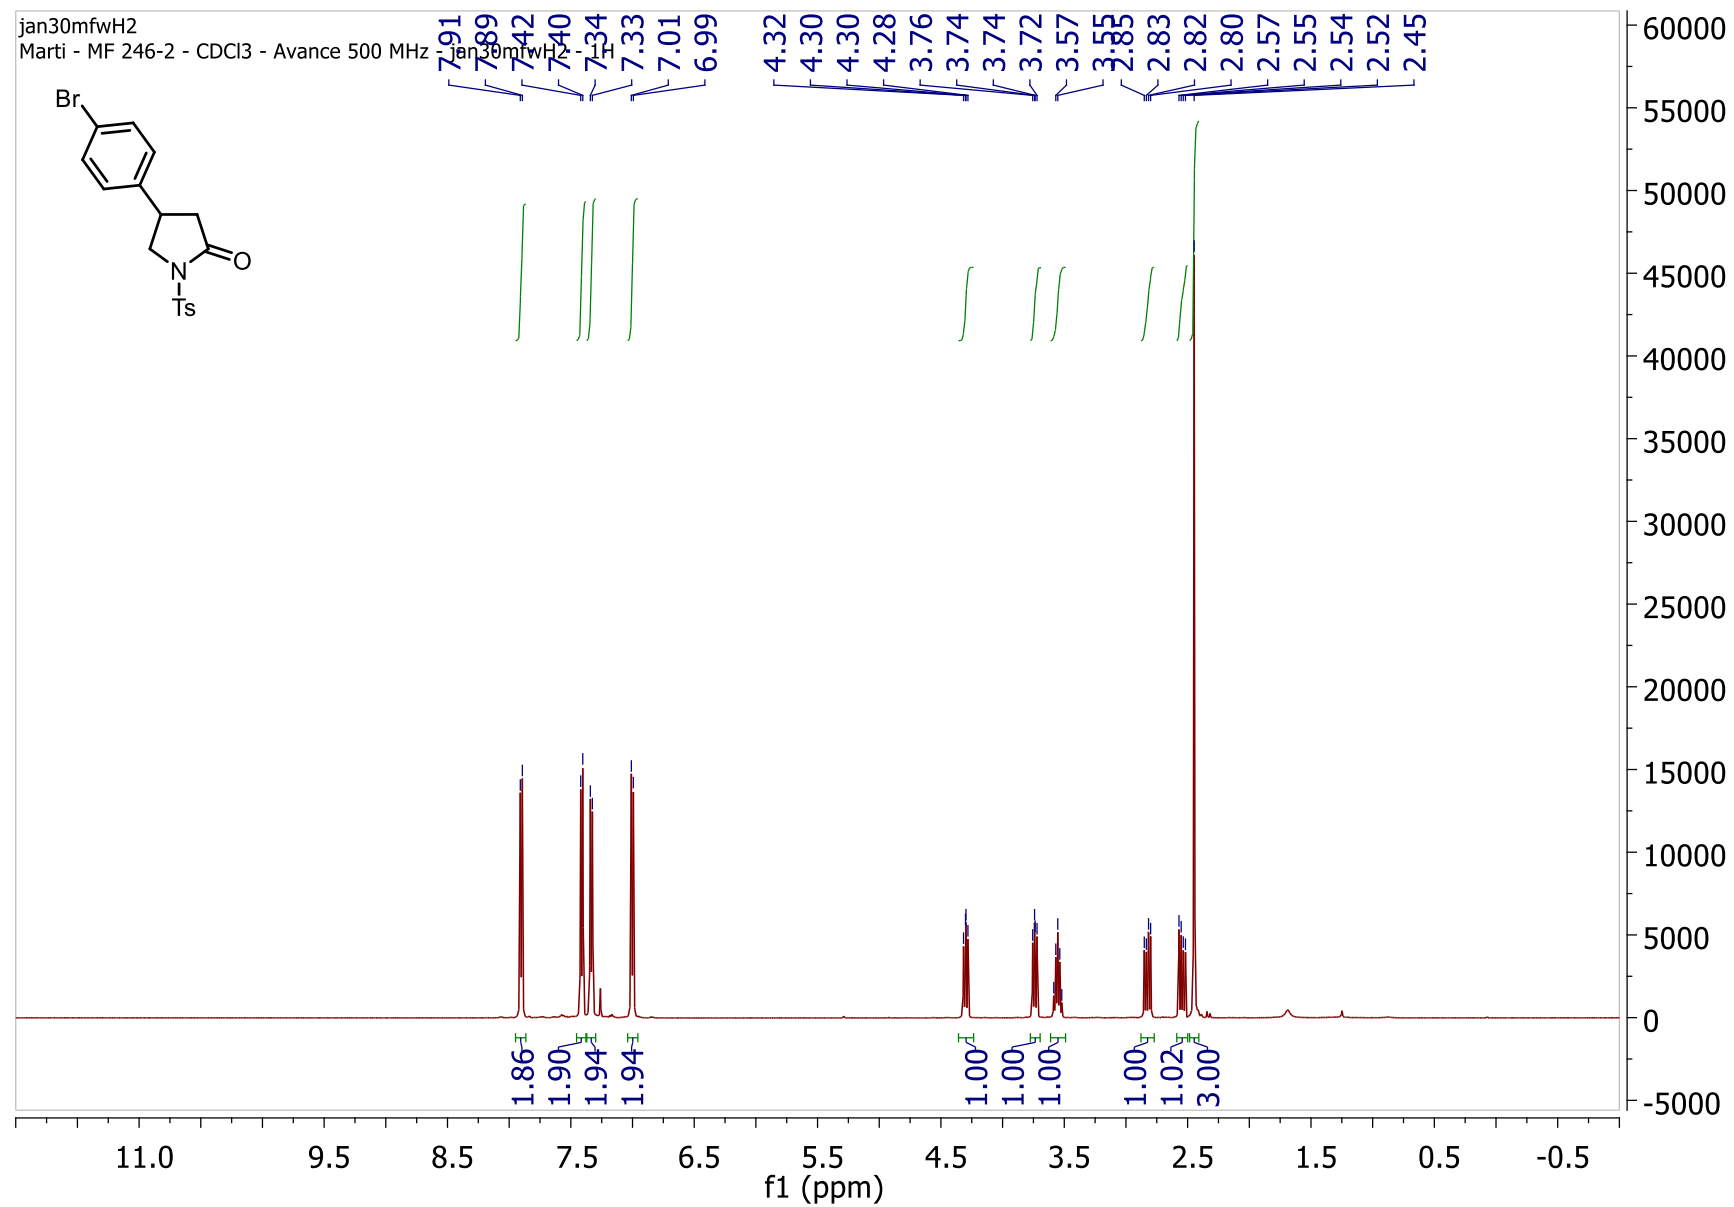

Figure SI30: <sup>1</sup>H NMR of compound **4bh**.

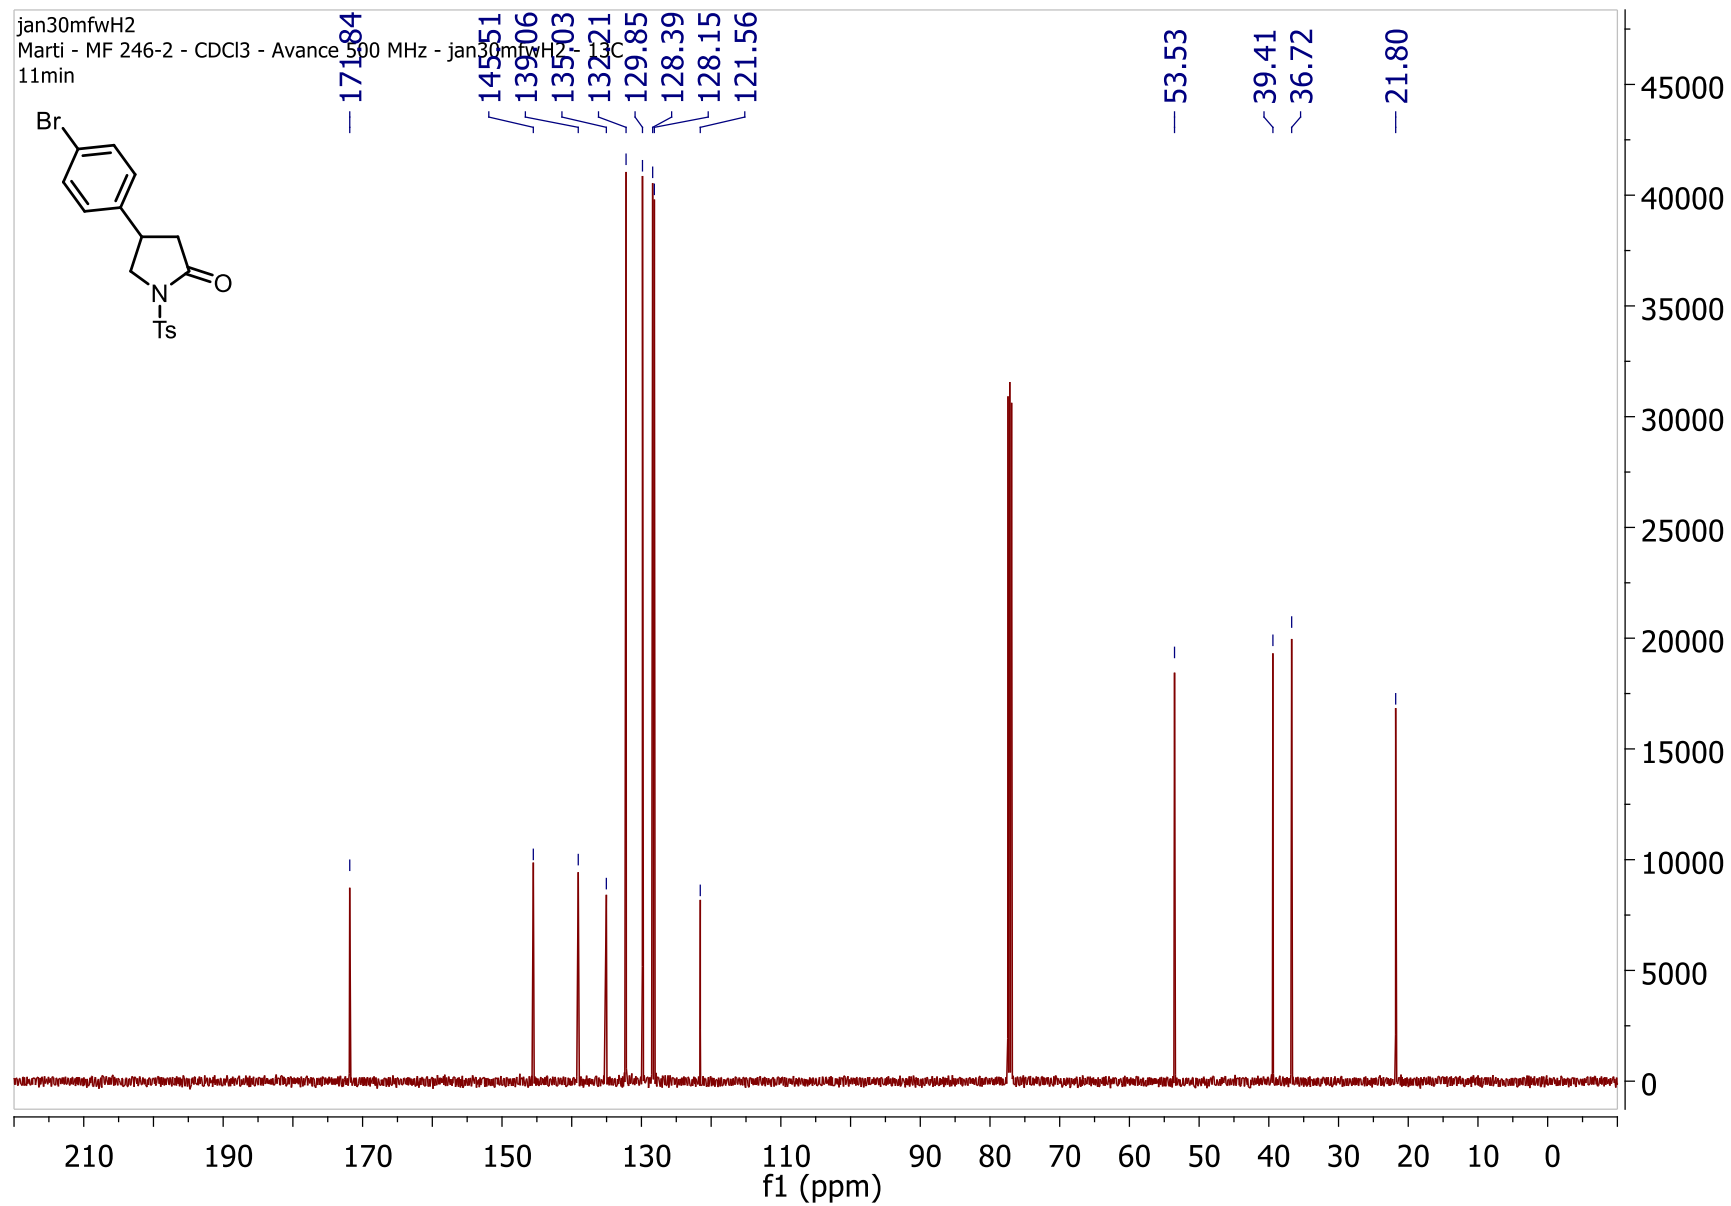

Figure SI31: <sup>13</sup>C NMR of compound 4bh.

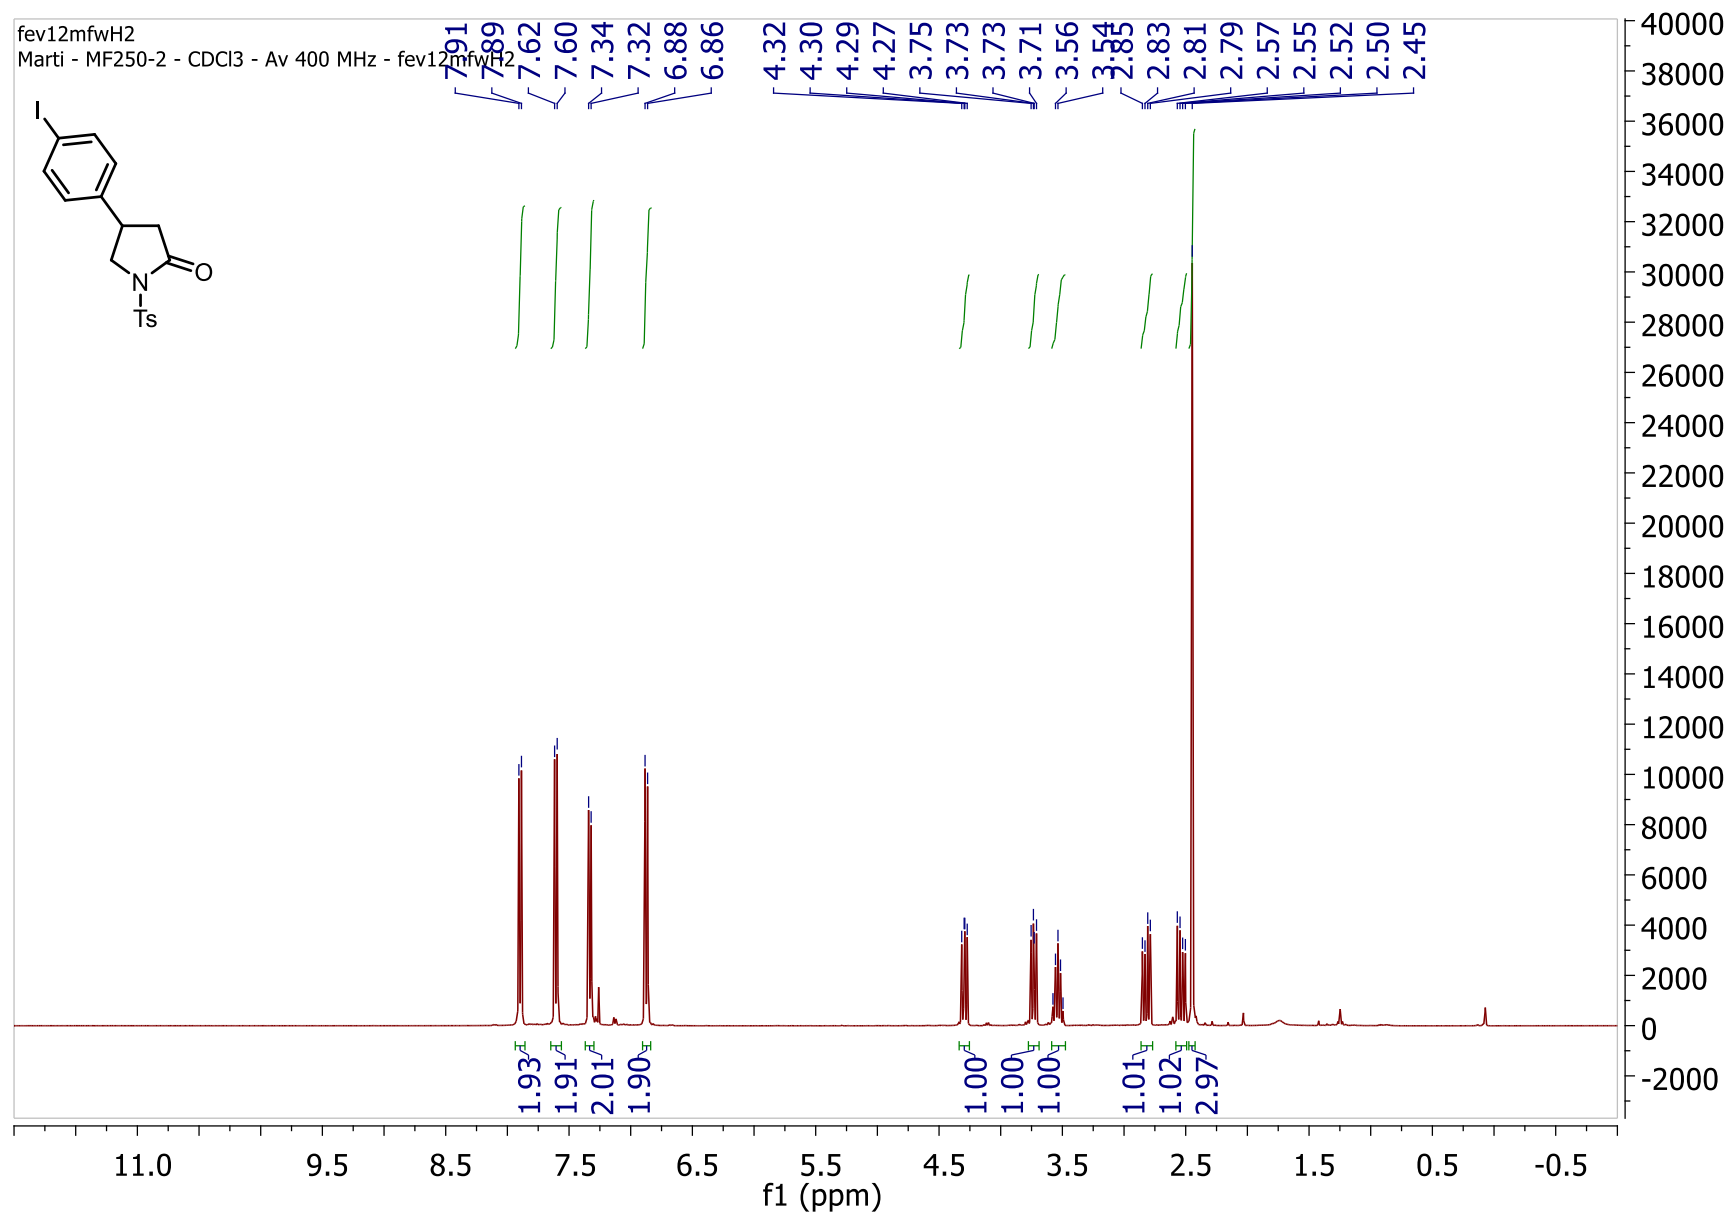

**Figure SI32:**  $^1\text{H}$  NMR of compound **4bi**.

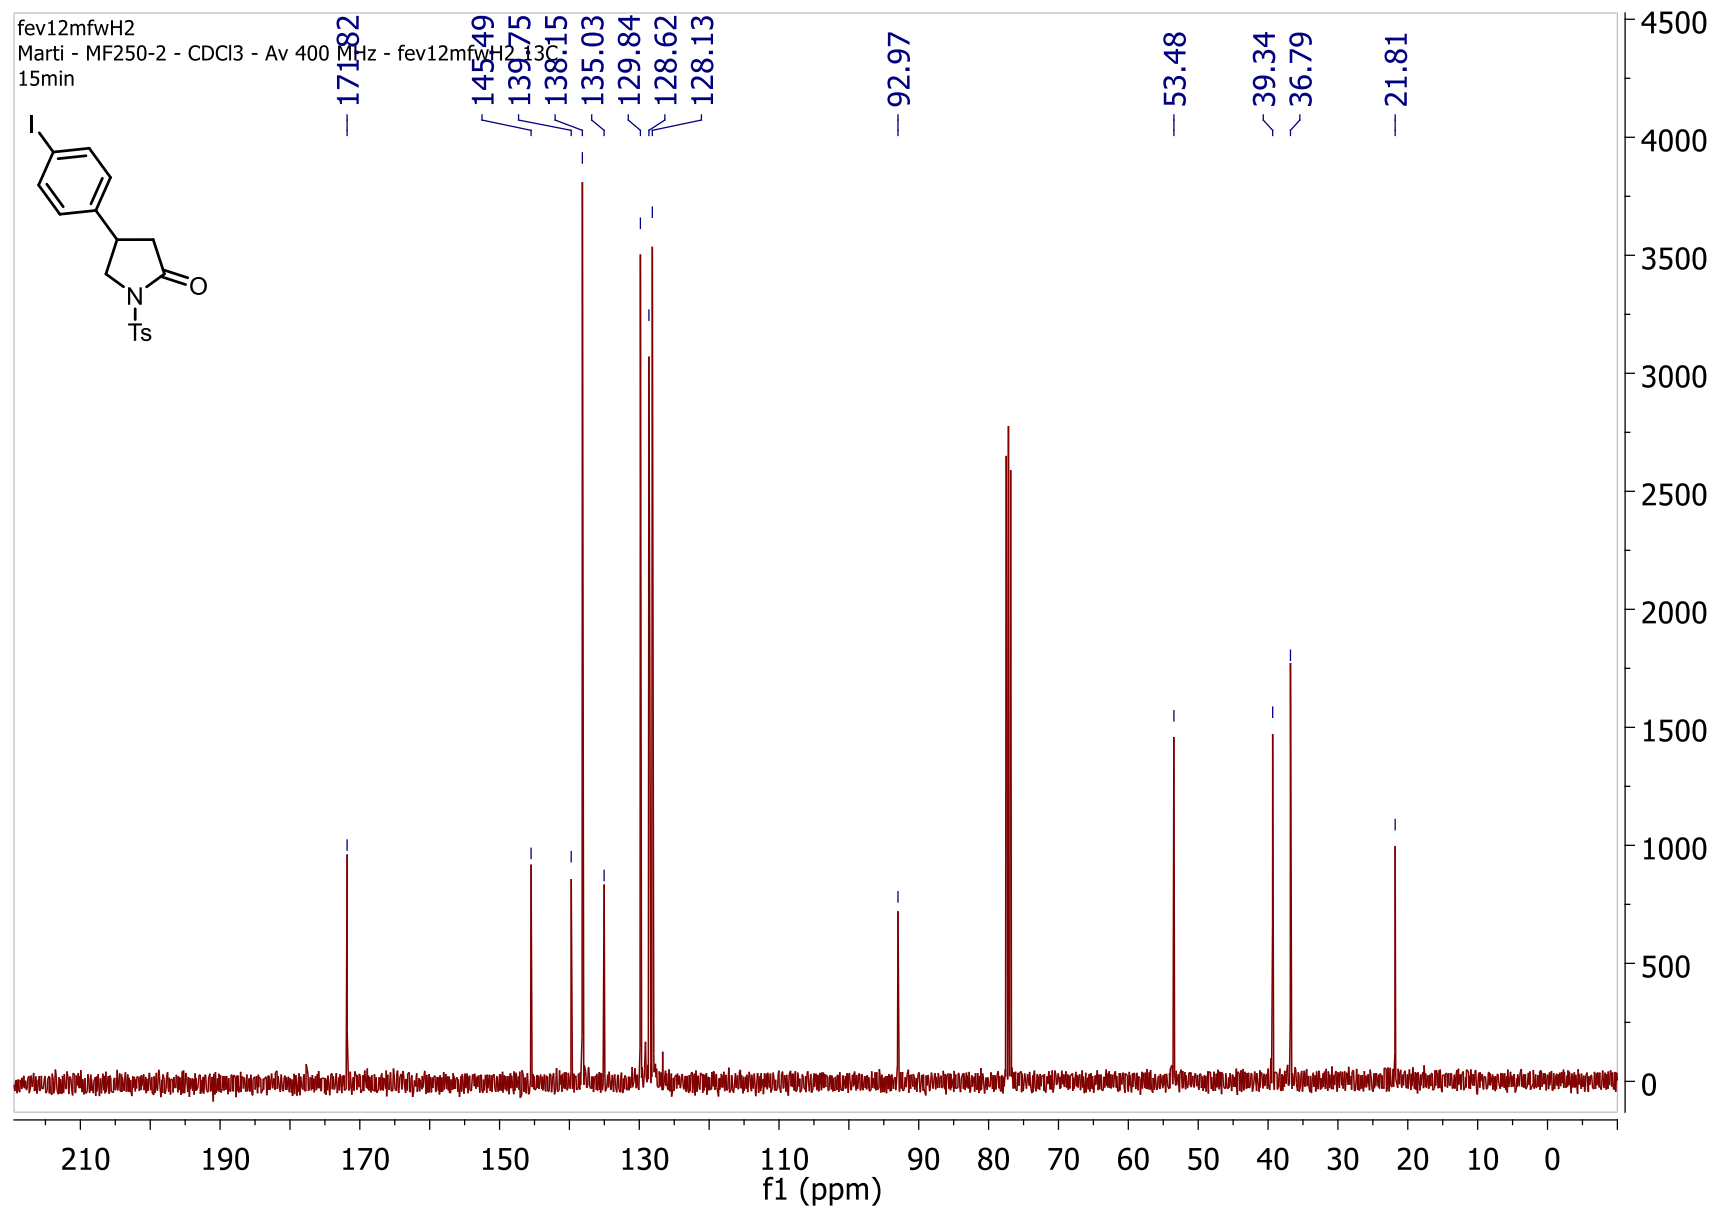

**Figure SI33:**  $^{13}\text{C}$  NMR of compound **4bi**.

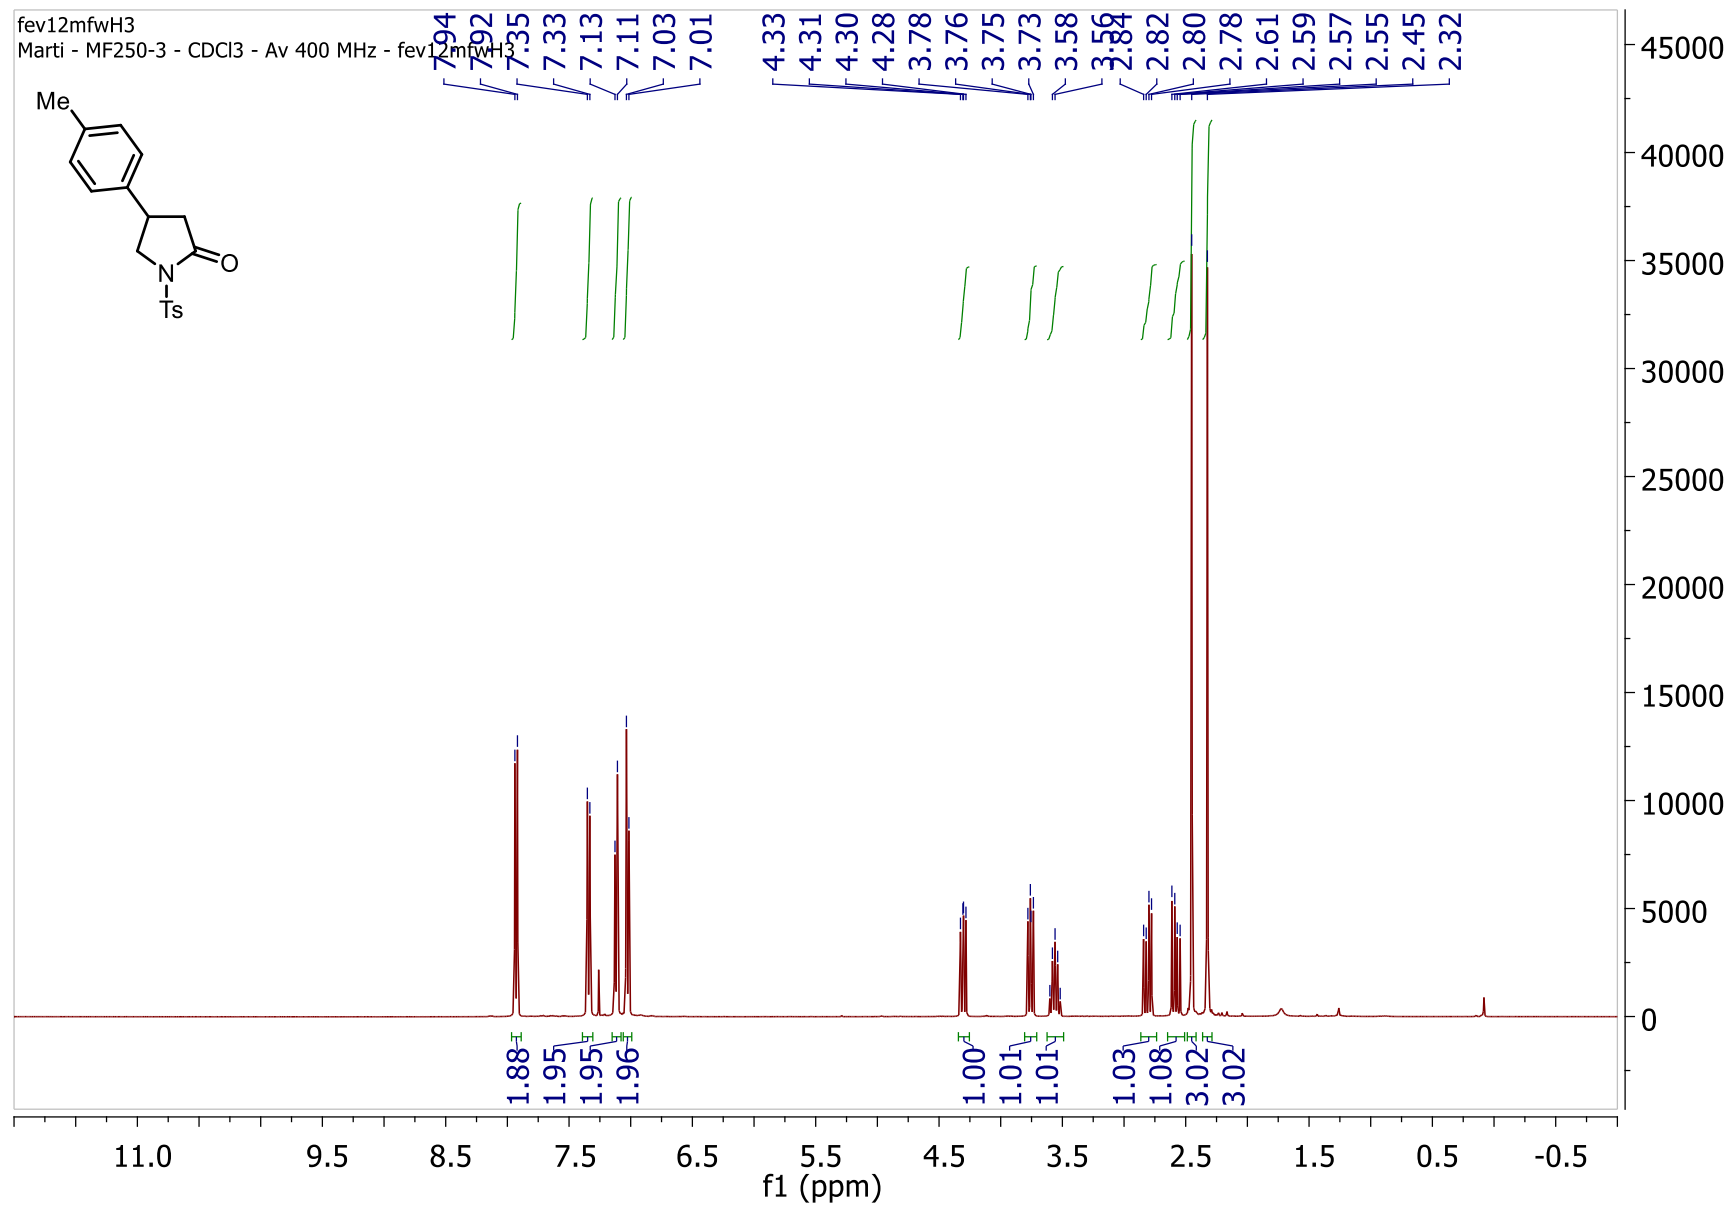

**Figure SI34:** <sup>1</sup>H NMR of compound **4bj**.

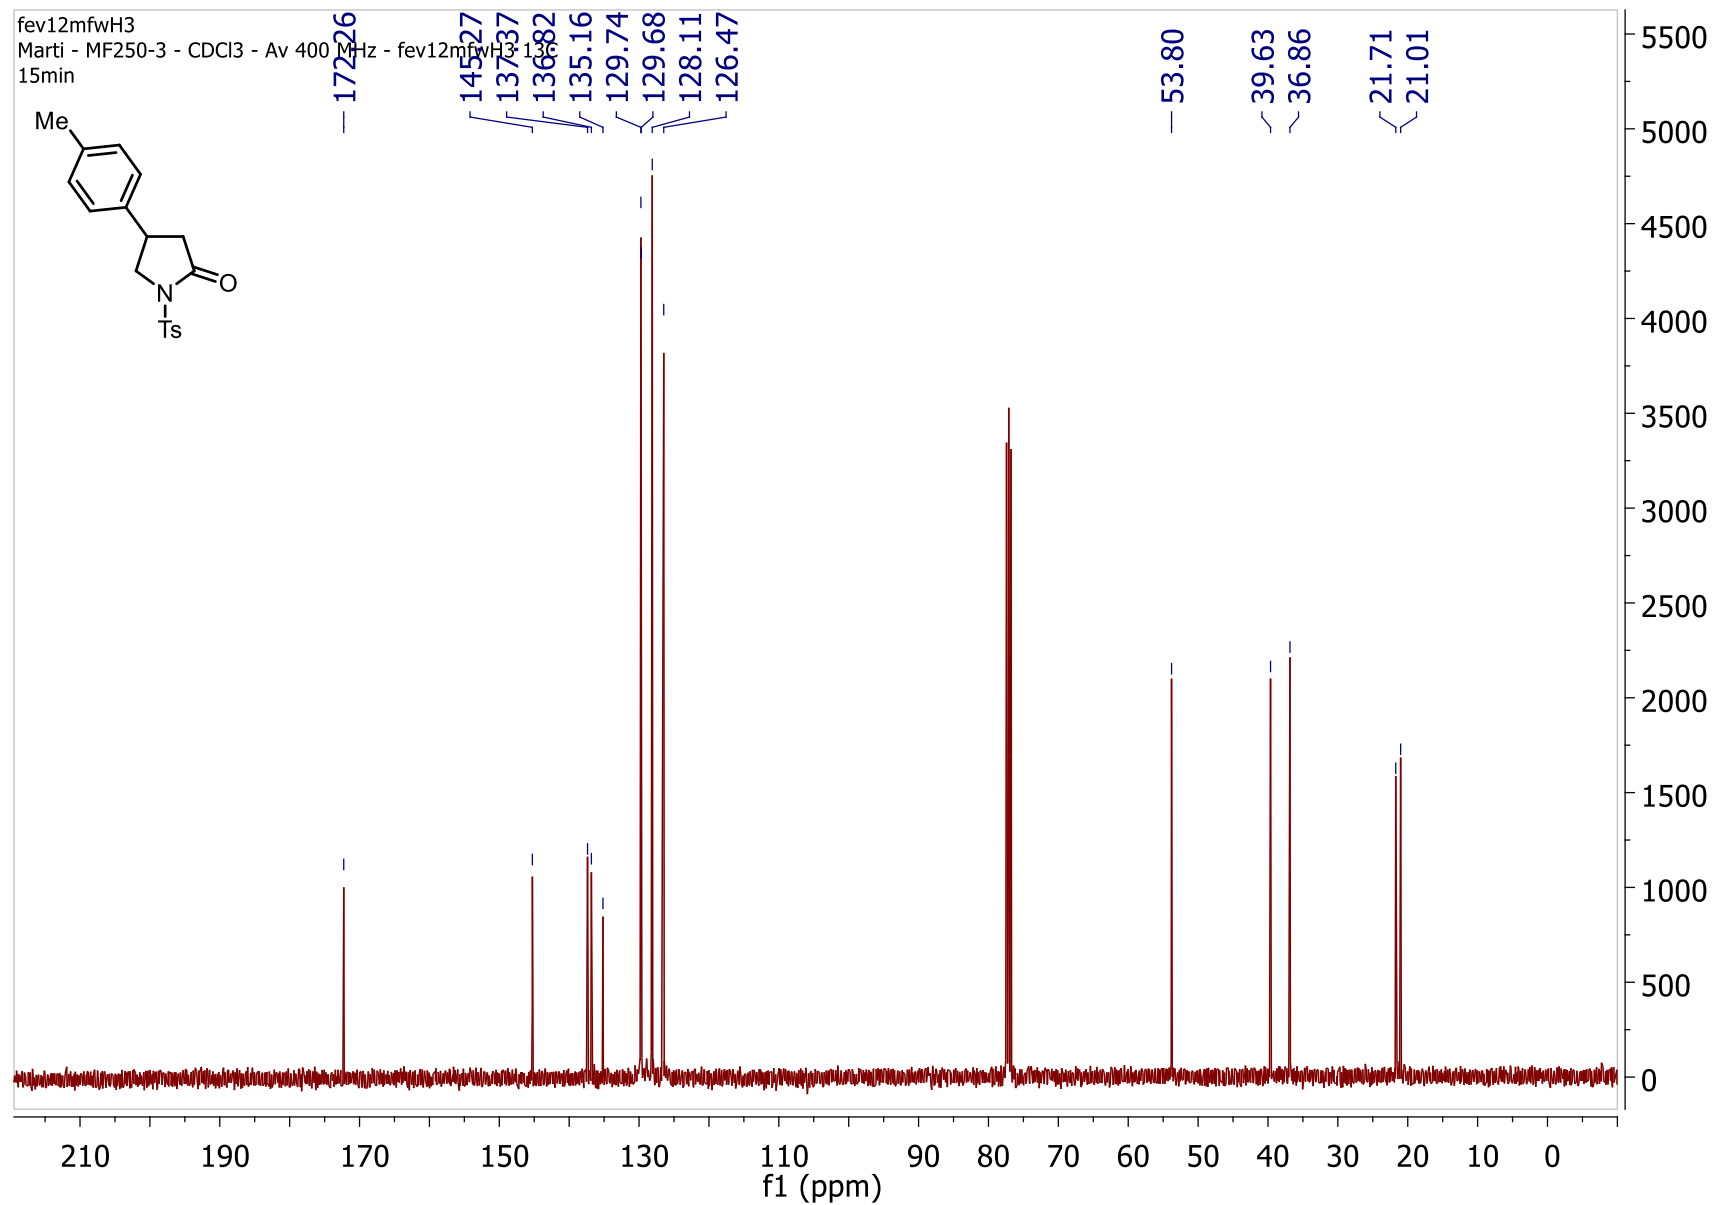

**Figure SI35:** <sup>13</sup>C NMR of compound **4bi**.

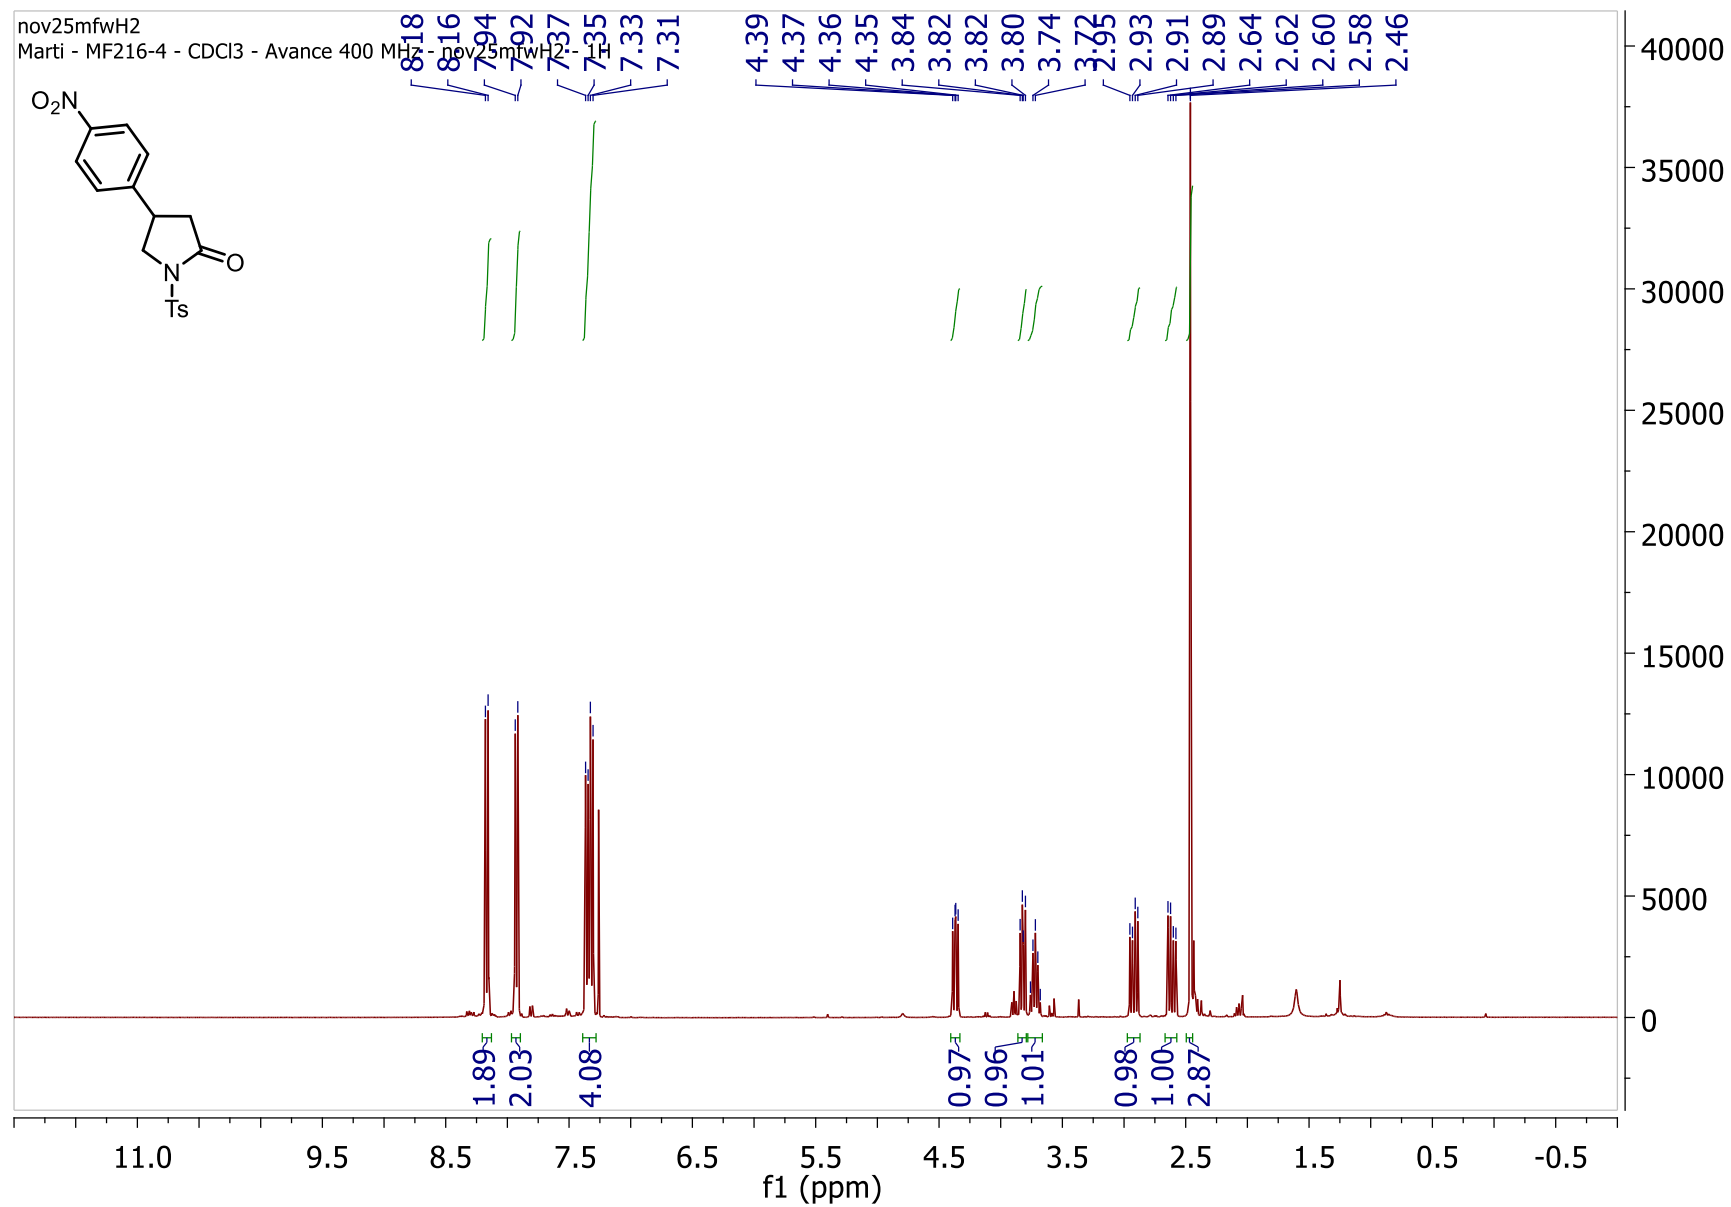

Figure SI36:  $^1\text{H}$  NMR of compound **4bk**.



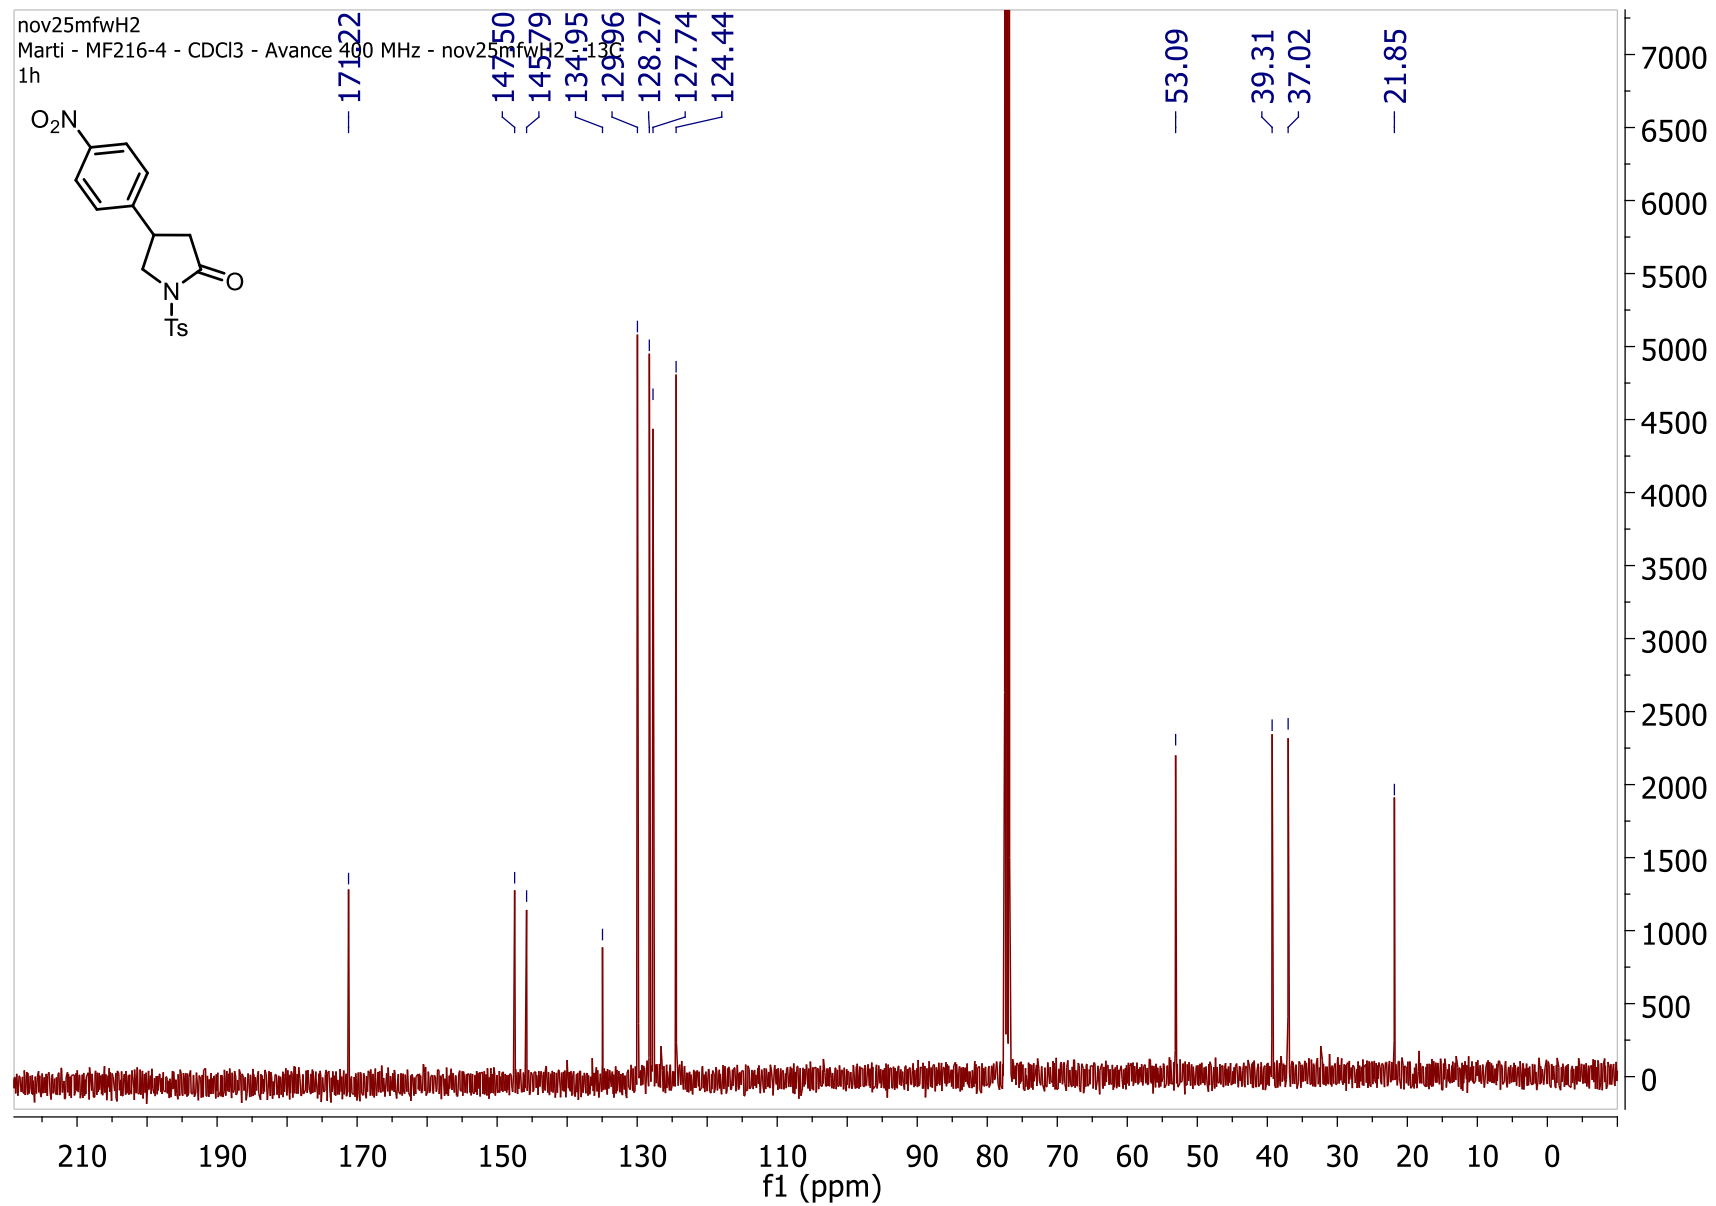

Figure SI37:  $^{13}\text{C}$  NMR of compound 4bk.

out16agoH3

Arnaldo - AGO 152 E2 - CDCl<sub>3</sub> - Avance 500 MHz - out16agoH3 - <sup>1</sup>H

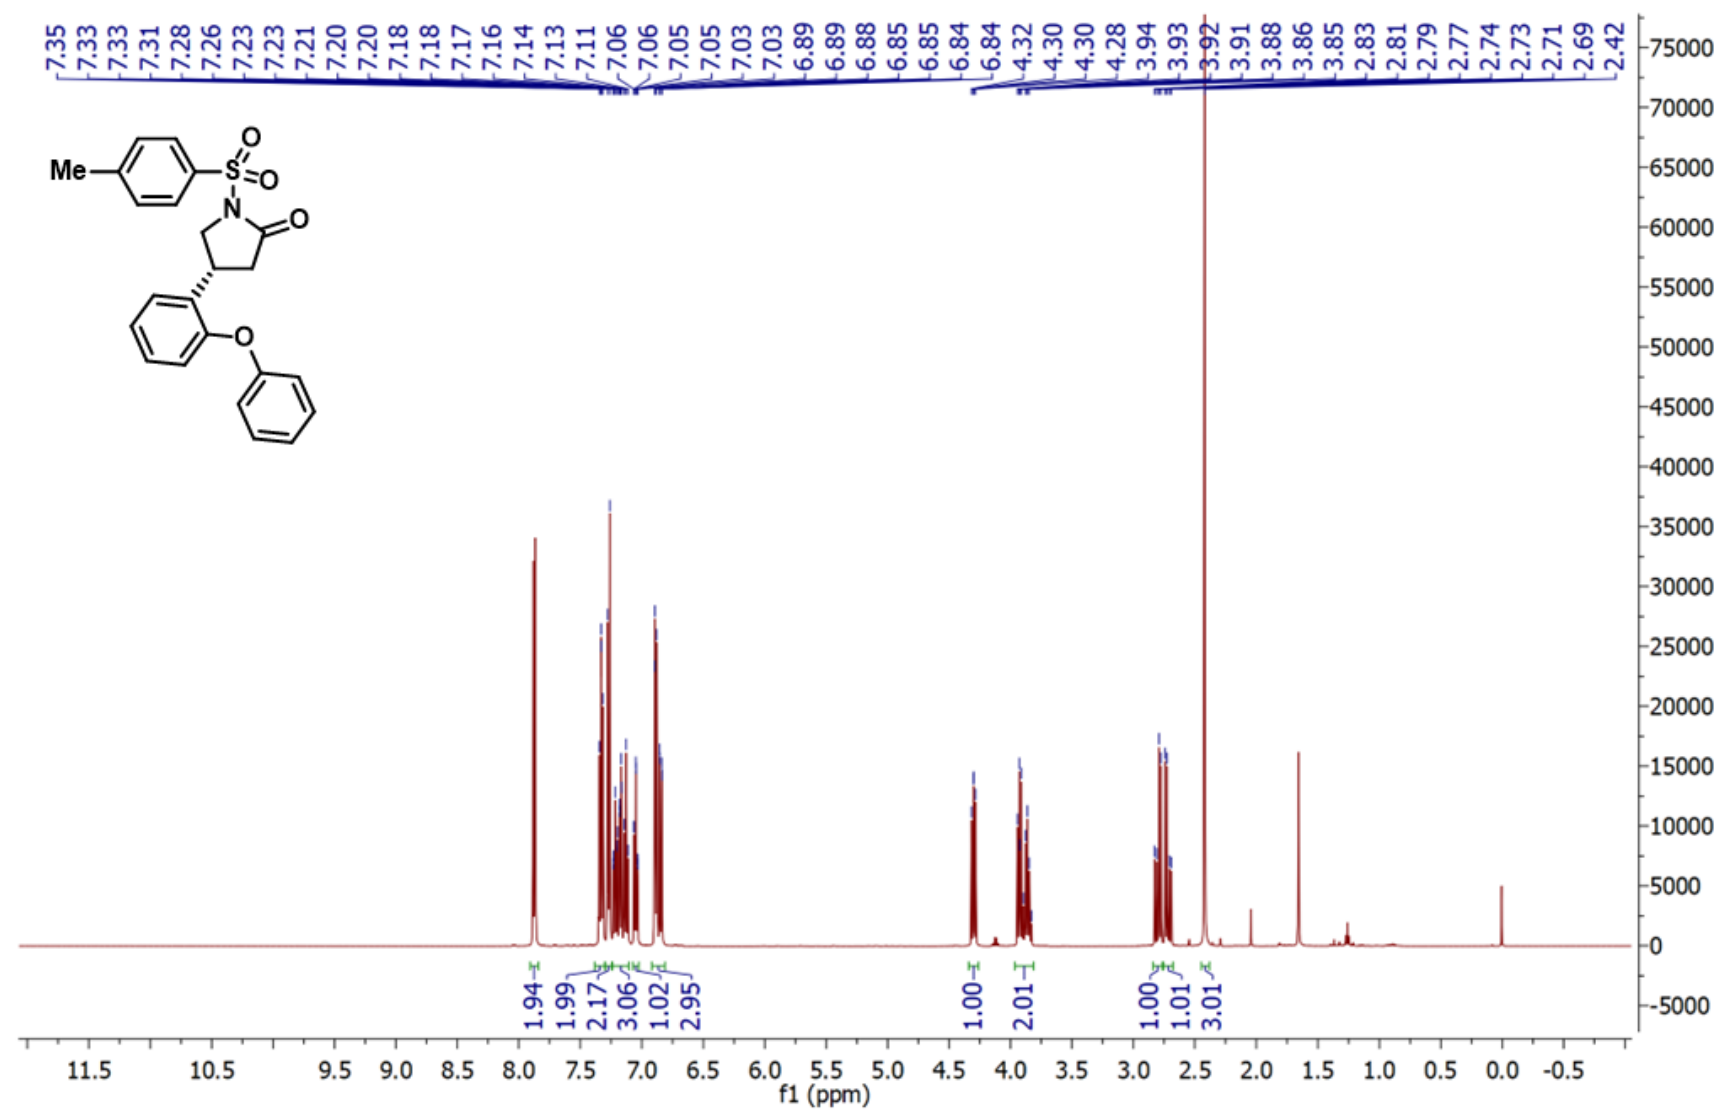

Figure SI38: <sup>1</sup>H NMR of compound 4bl.

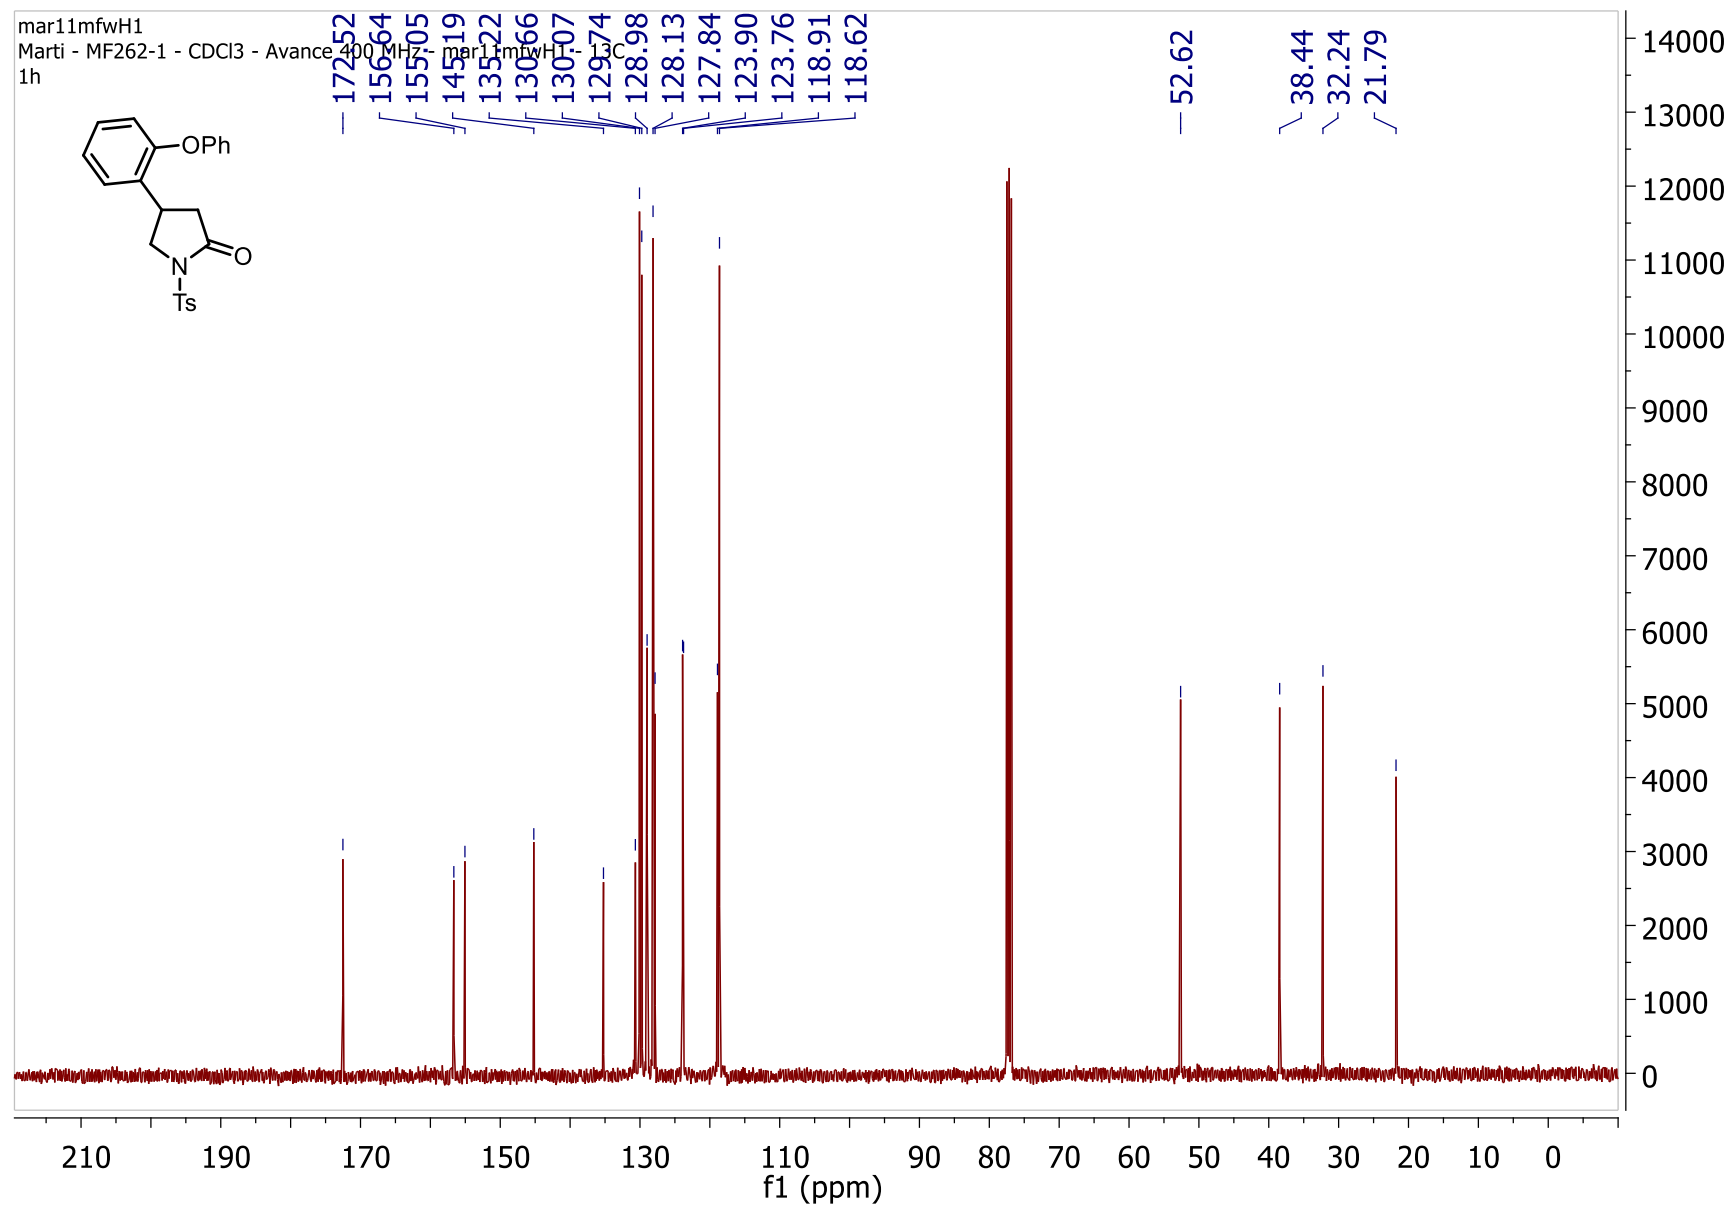

**Figure SI39:**  $^{13}\text{C}$  NMR of compound **4bl**.

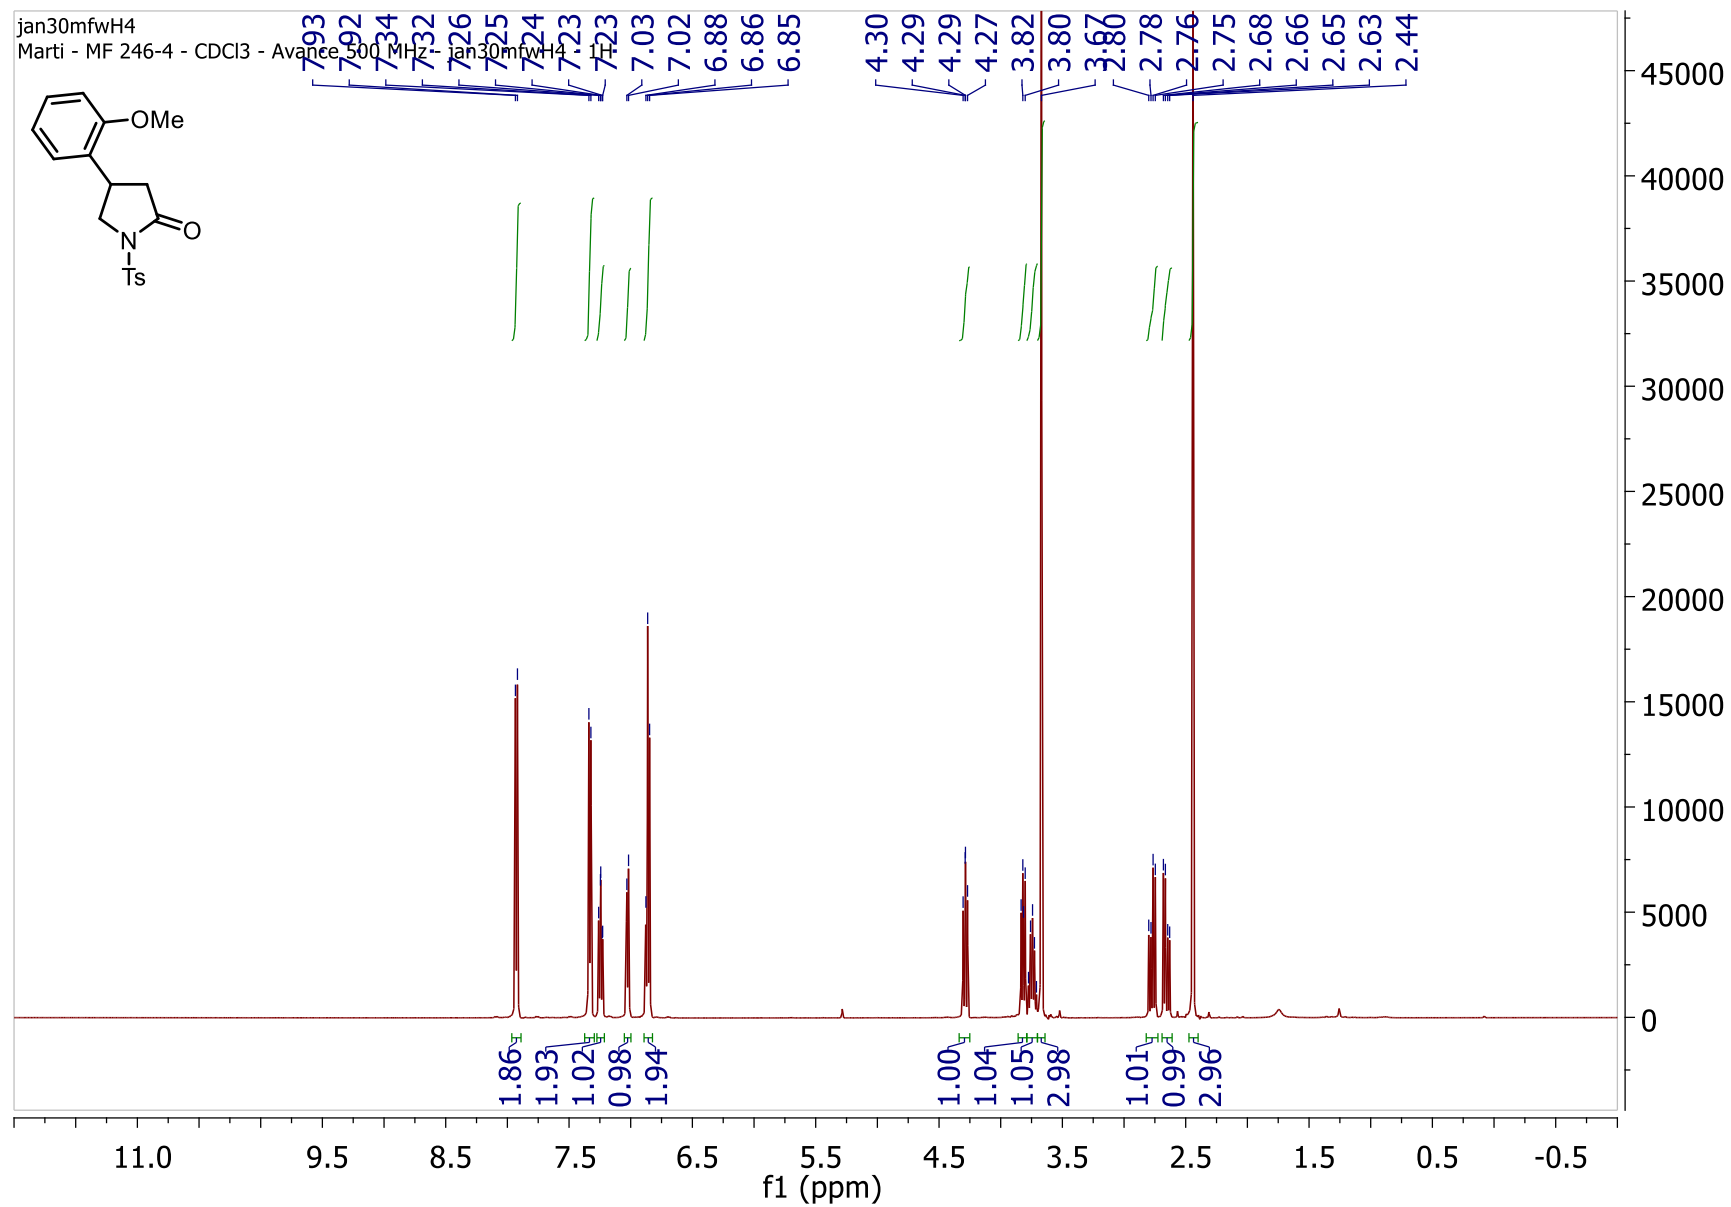

**Figure SI40:** <sup>1</sup>H NMR of compound **4bm**.

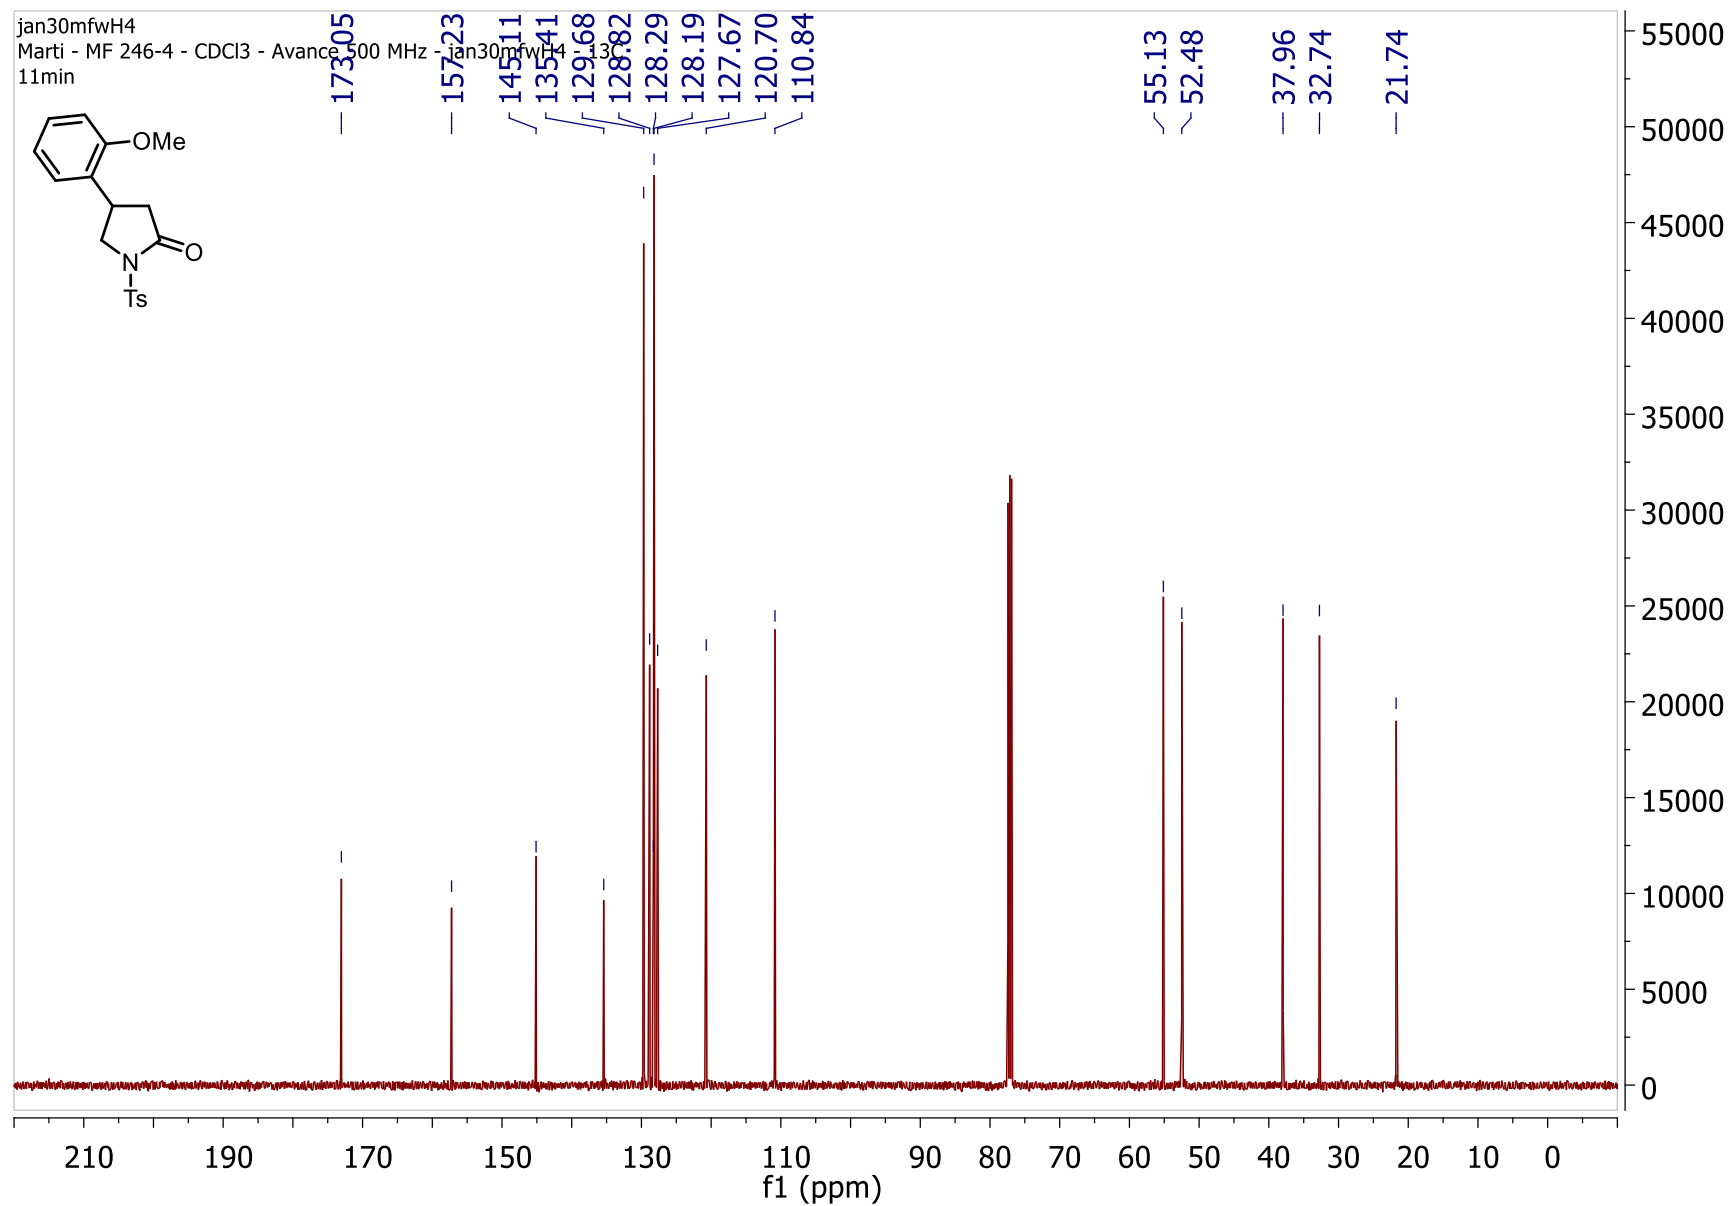

**Figure SI41:** <sup>13</sup>C NMR of compound **4bm**.

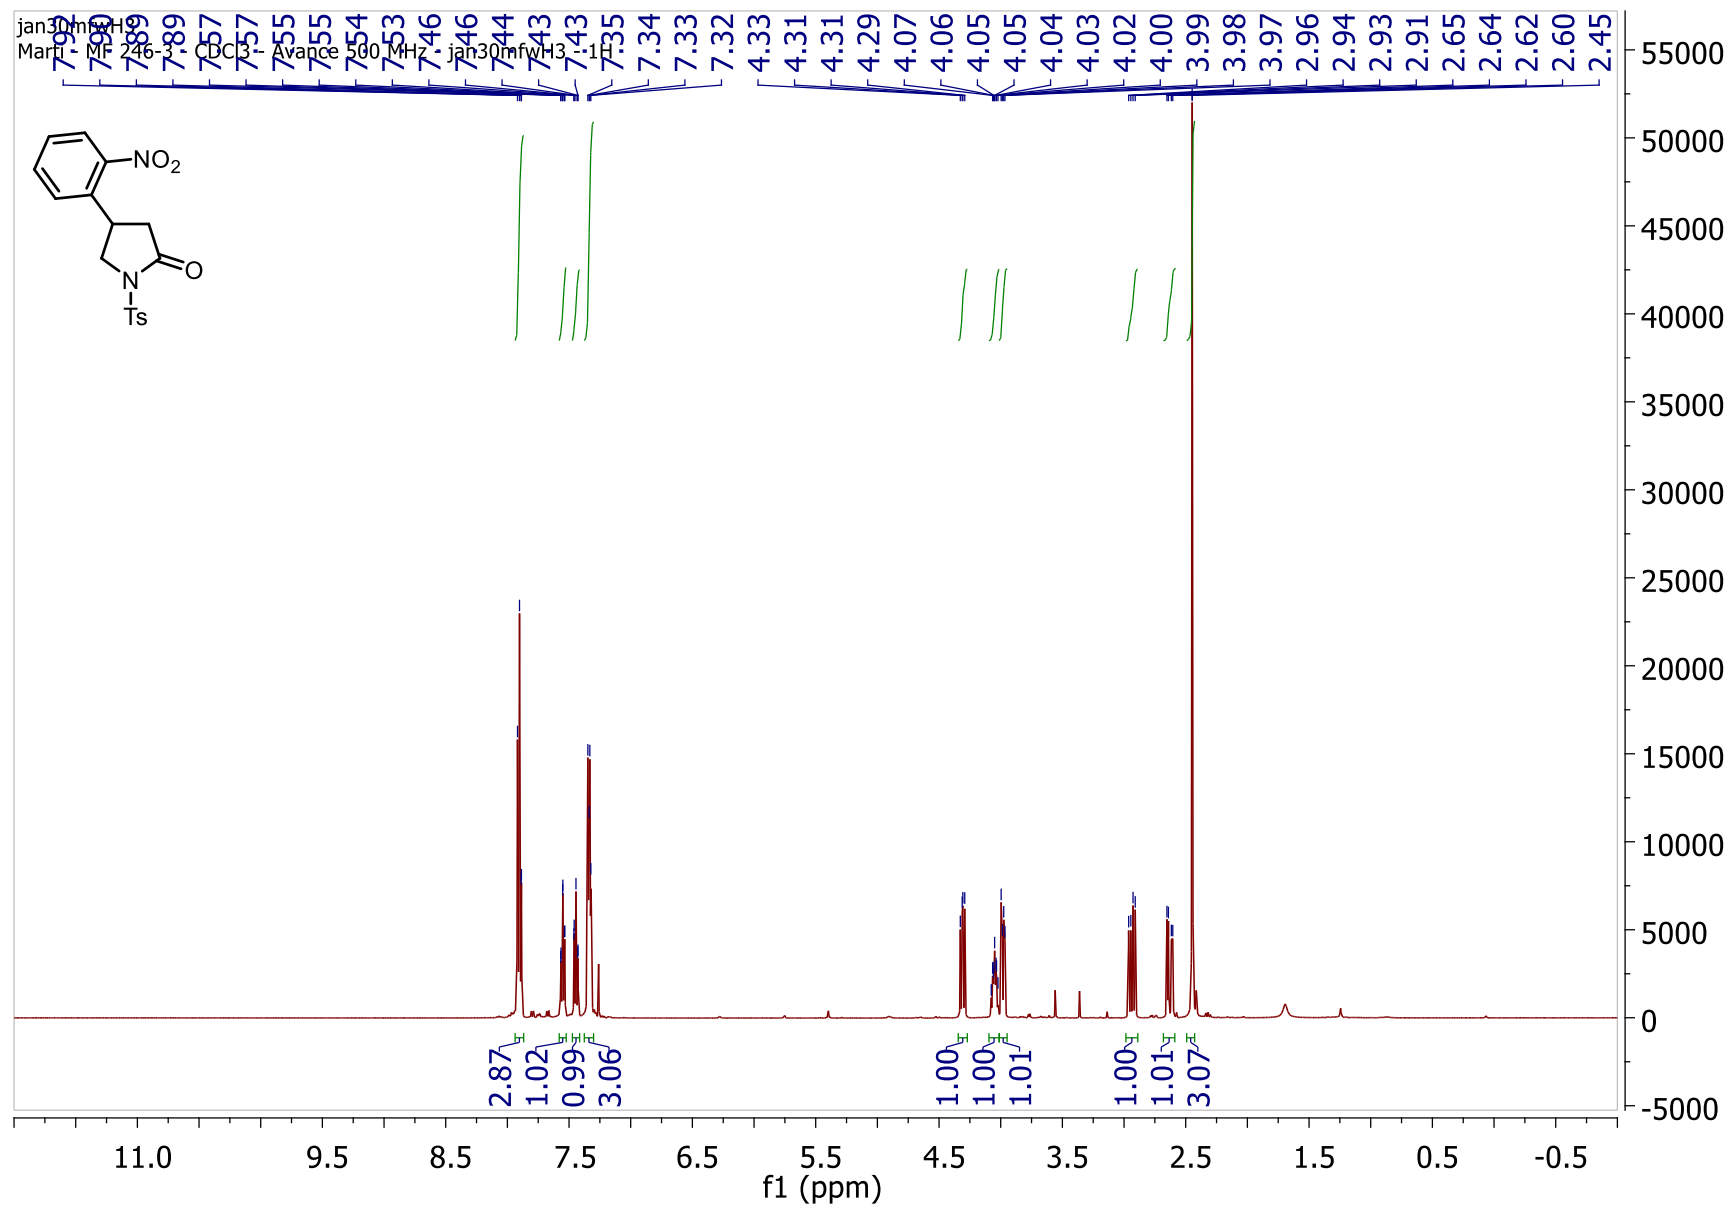

**Figure SI42:**  $^1\text{H}$  NMR of compound **4bn**.

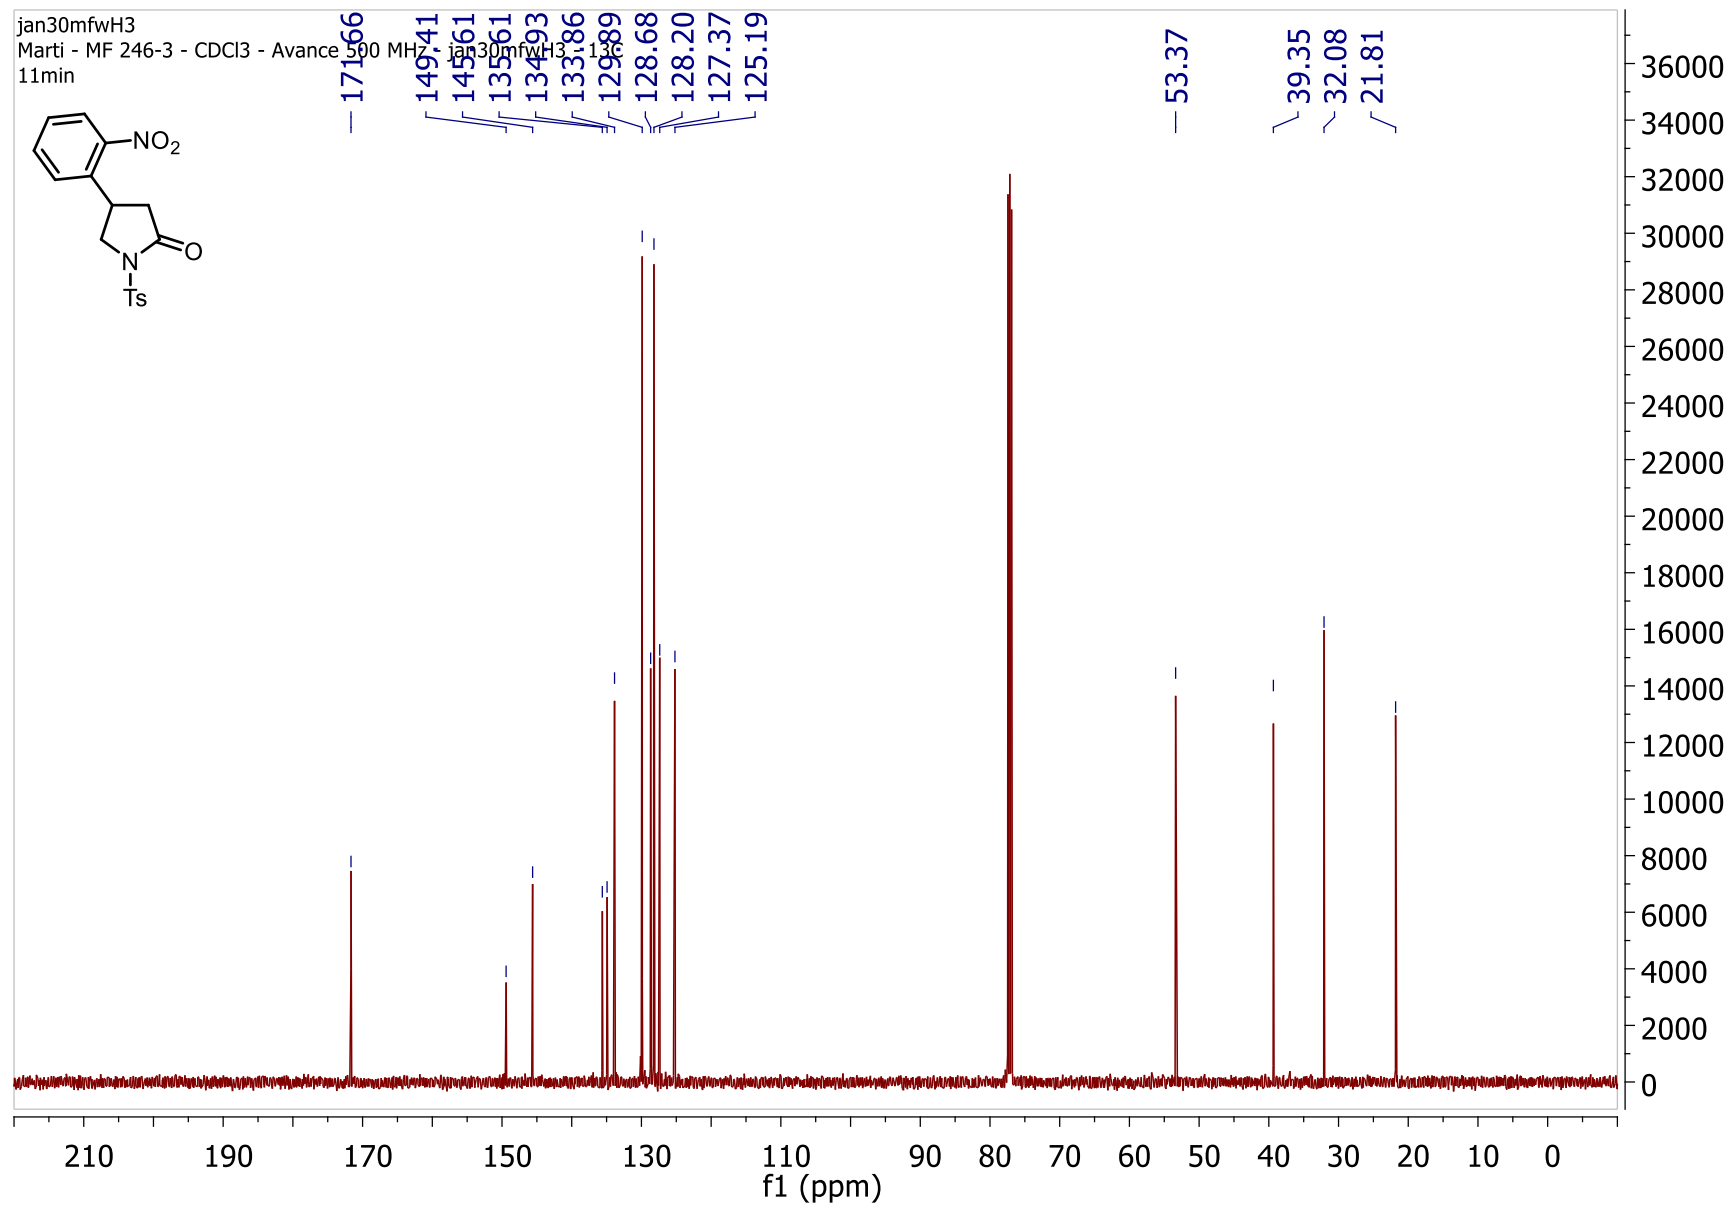

Figure SI43: <sup>13</sup>C NMR of compound 4bn.



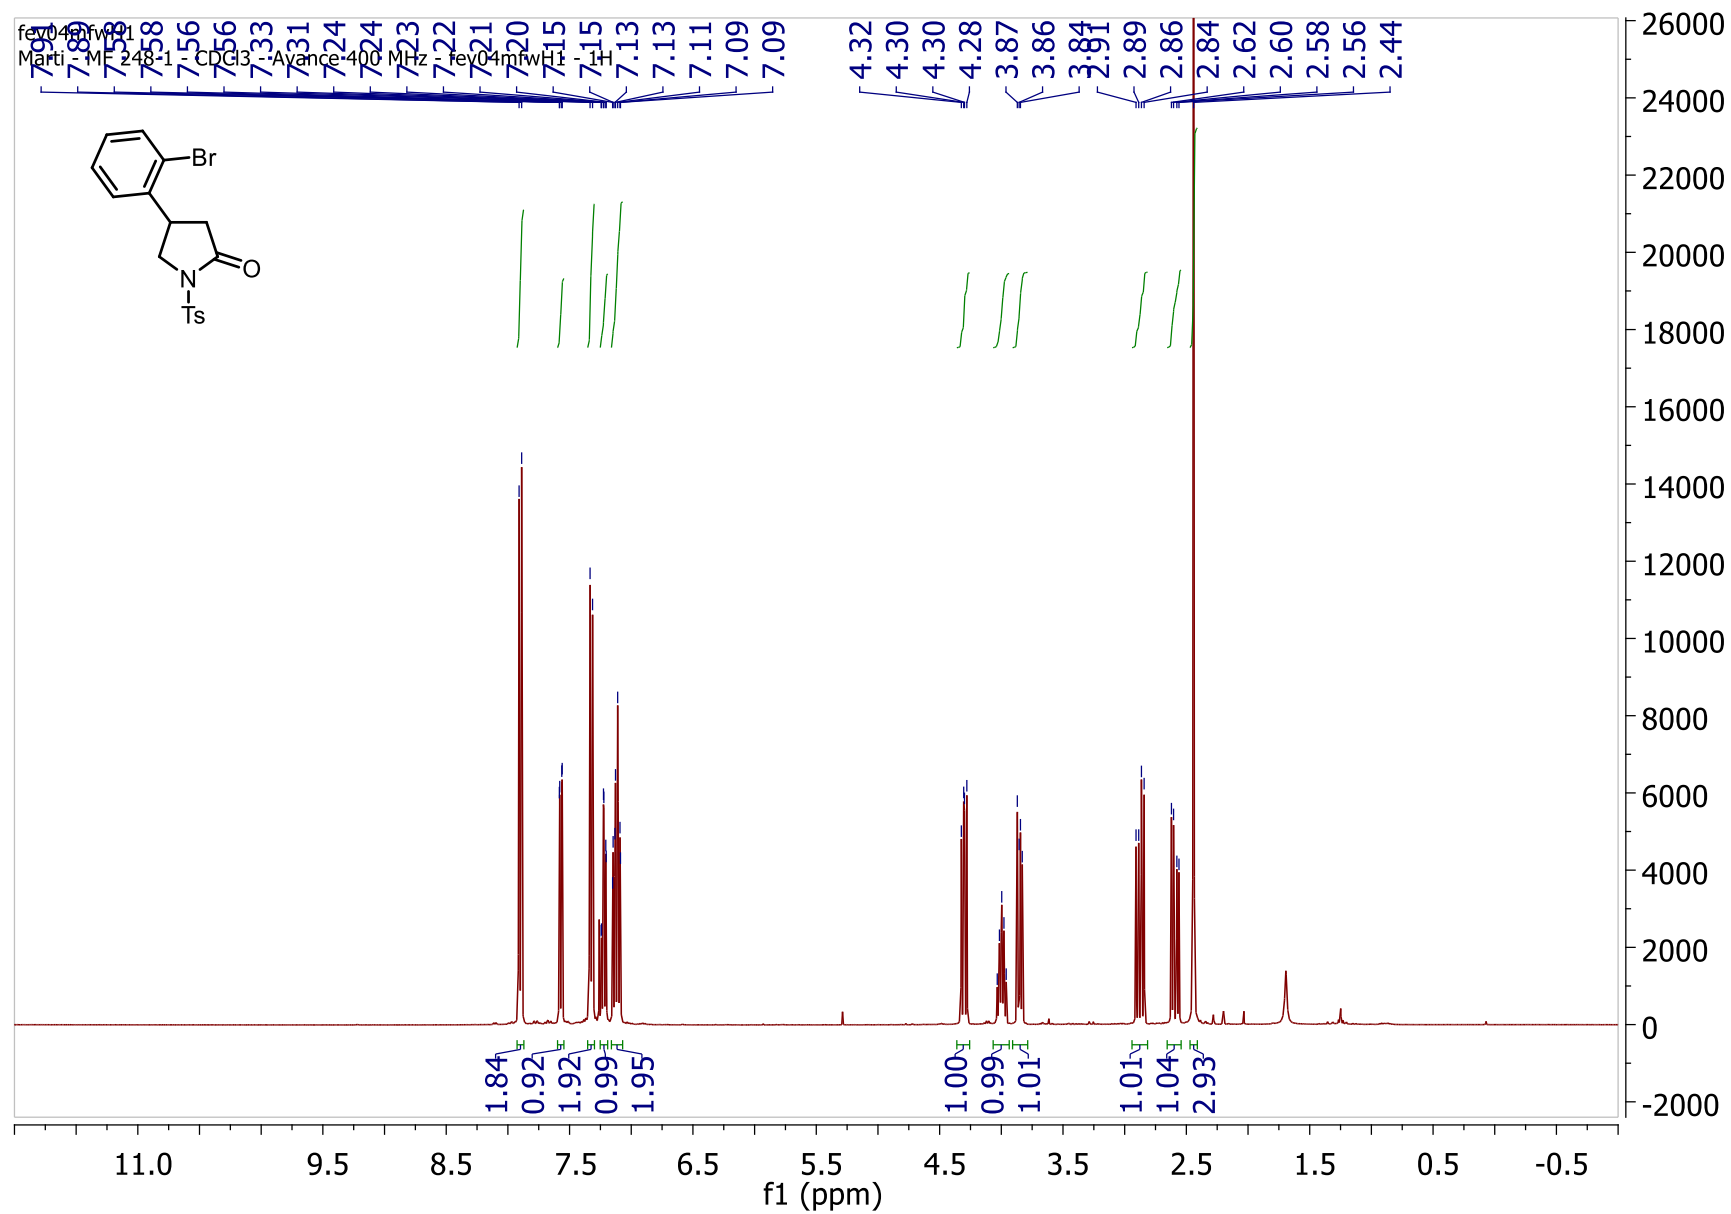

**Figure SI44:** <sup>1</sup>H NMR of compound **4bo**.

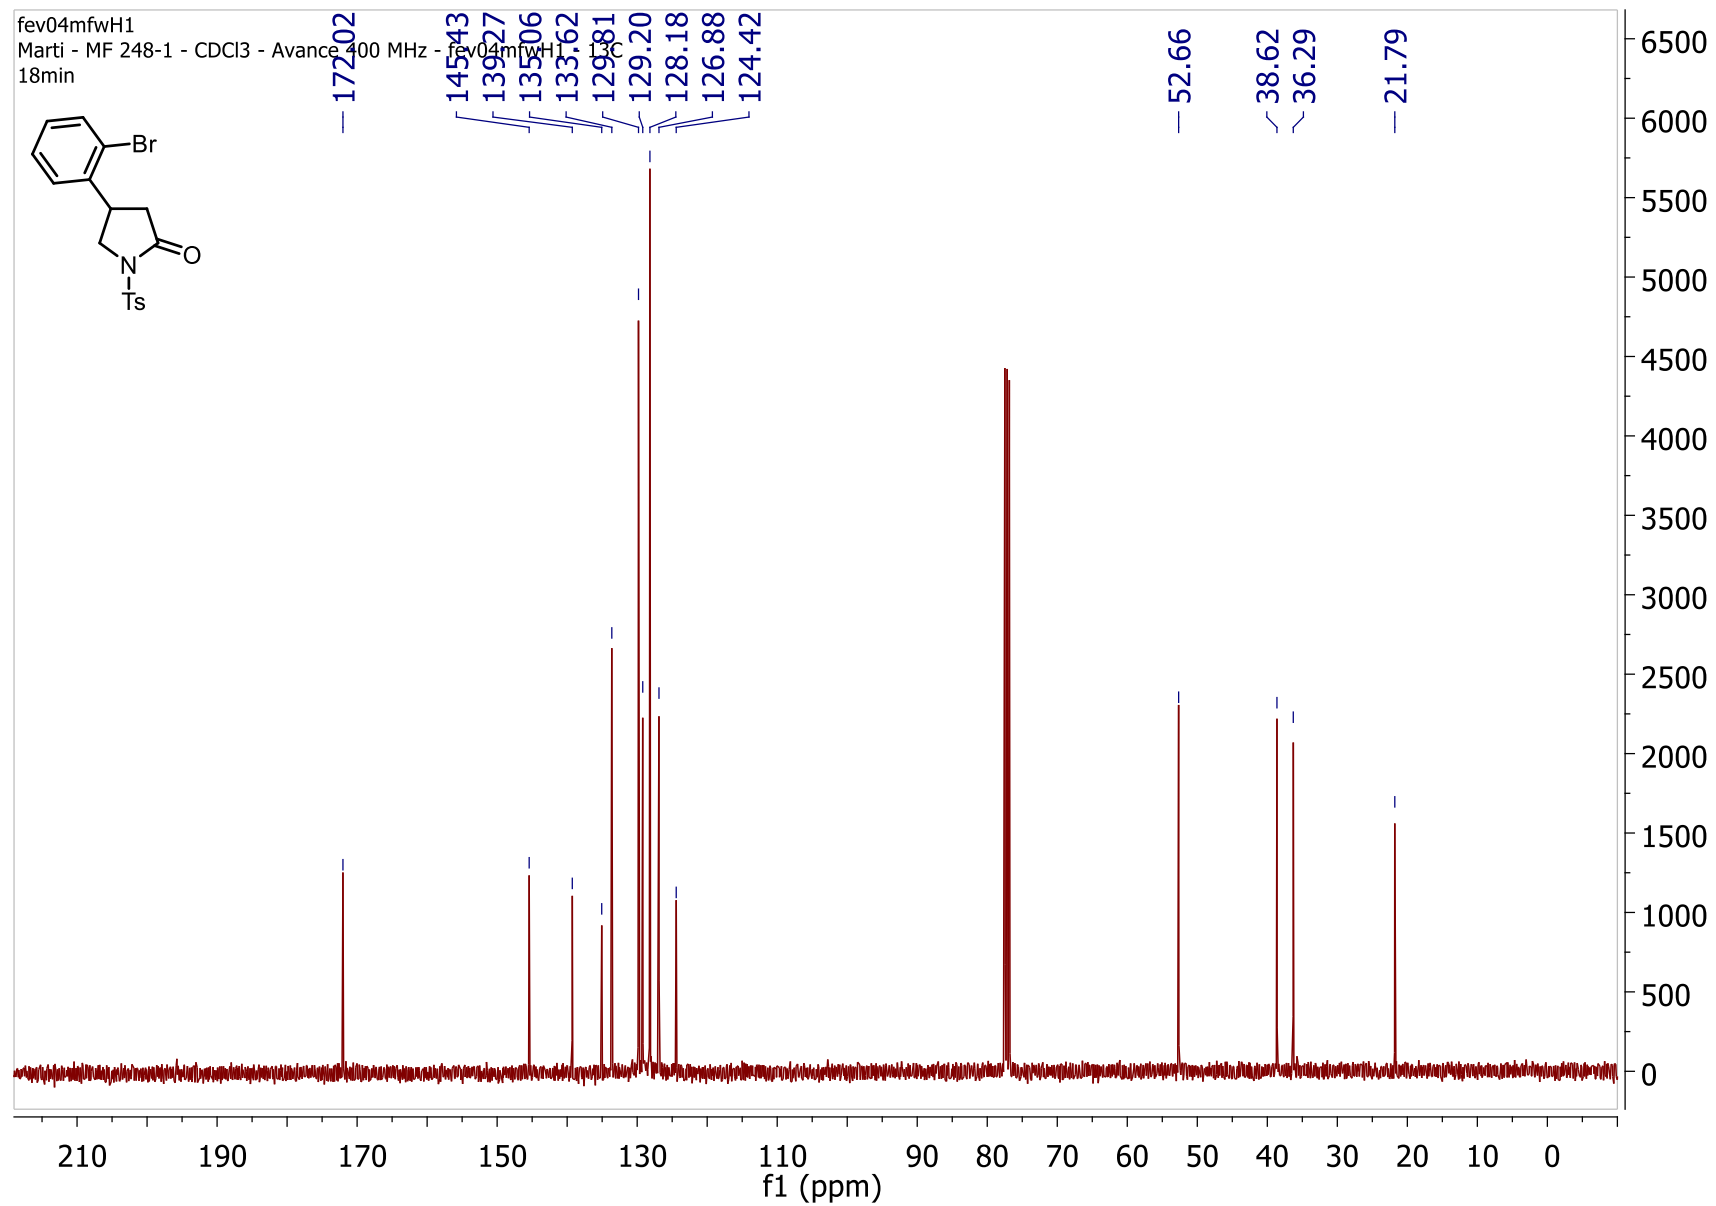

**Figure SI45:** <sup>13</sup>C NMR of compound **4bo**.

nov27agoH1

Arnaldo - AGO-152-F2 - CDCl<sub>3</sub> - Avance 500 MHz - nov27agoH1 - 1H

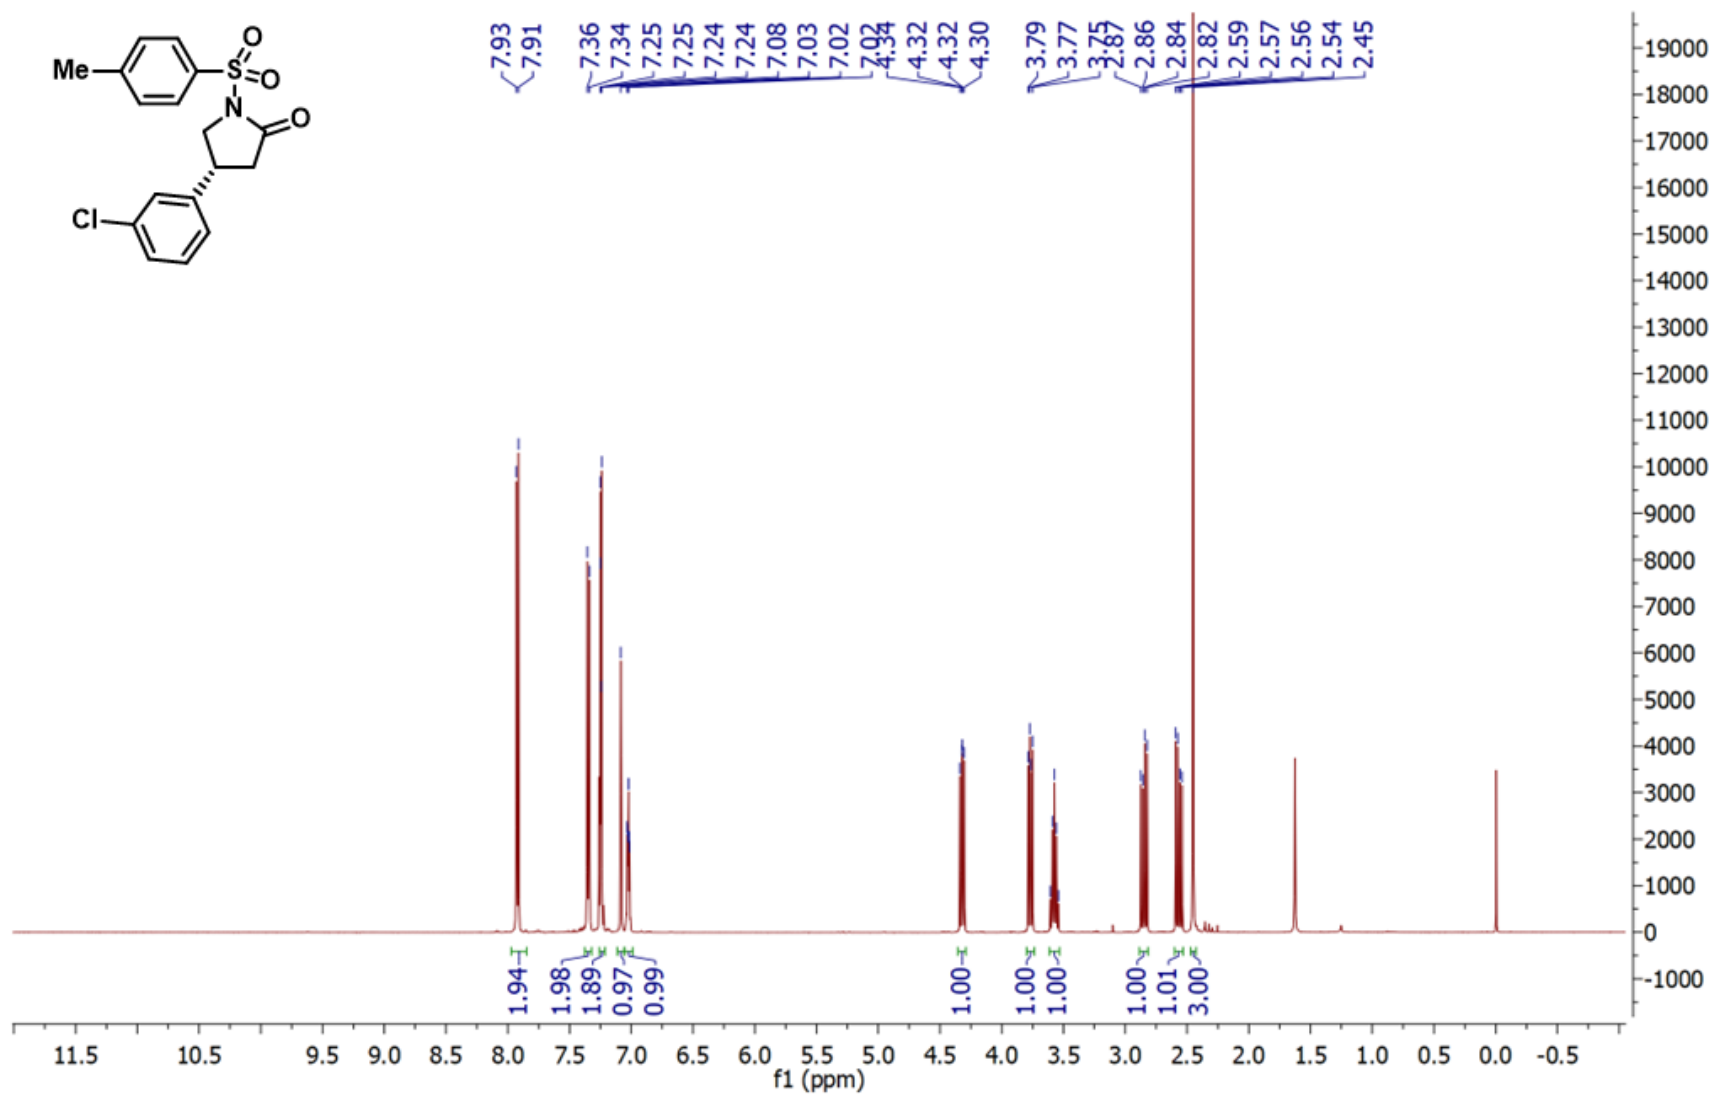

Figure SI46: <sup>1</sup>H NMR of compound **4bp**

nov27agoH1  
Arnaldo - AGO-152-F2 - CDCl<sub>3</sub> - Avance 500 MHz - nov27agoH1 - <sup>13</sup>C  
30 min

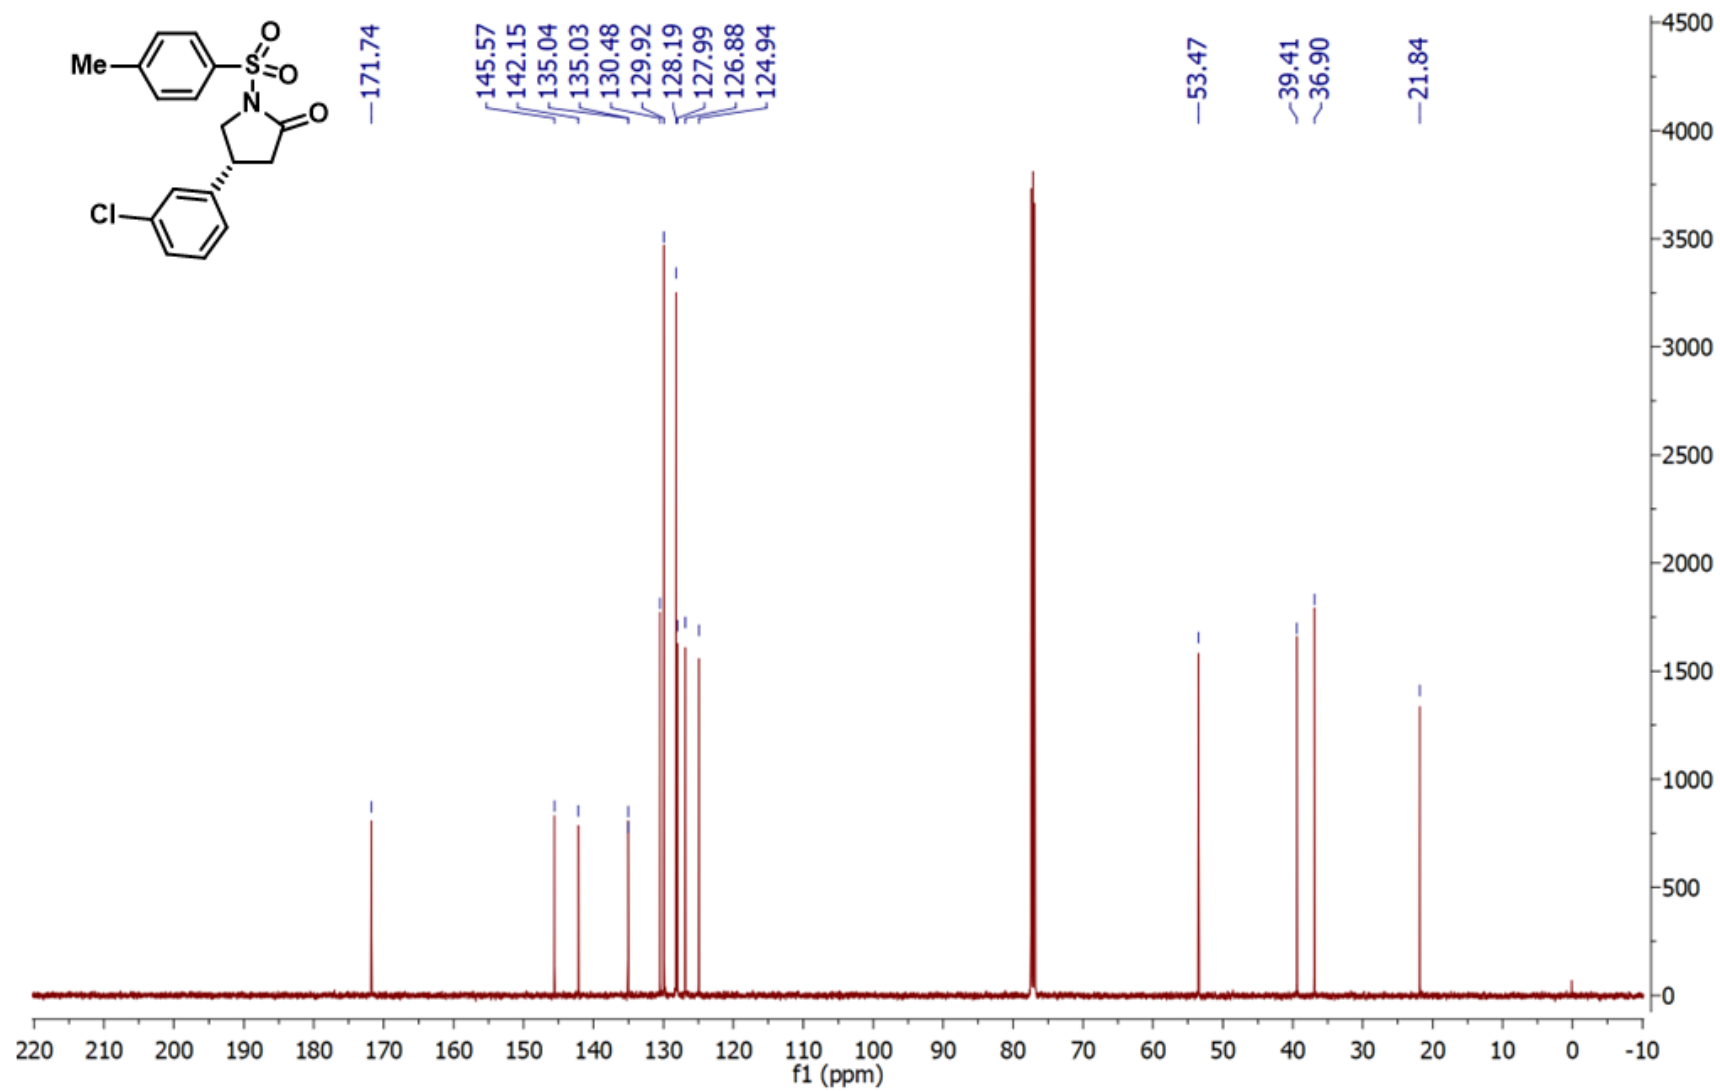

Figure SI47: <sup>13</sup>C NMR of compound 4bp.

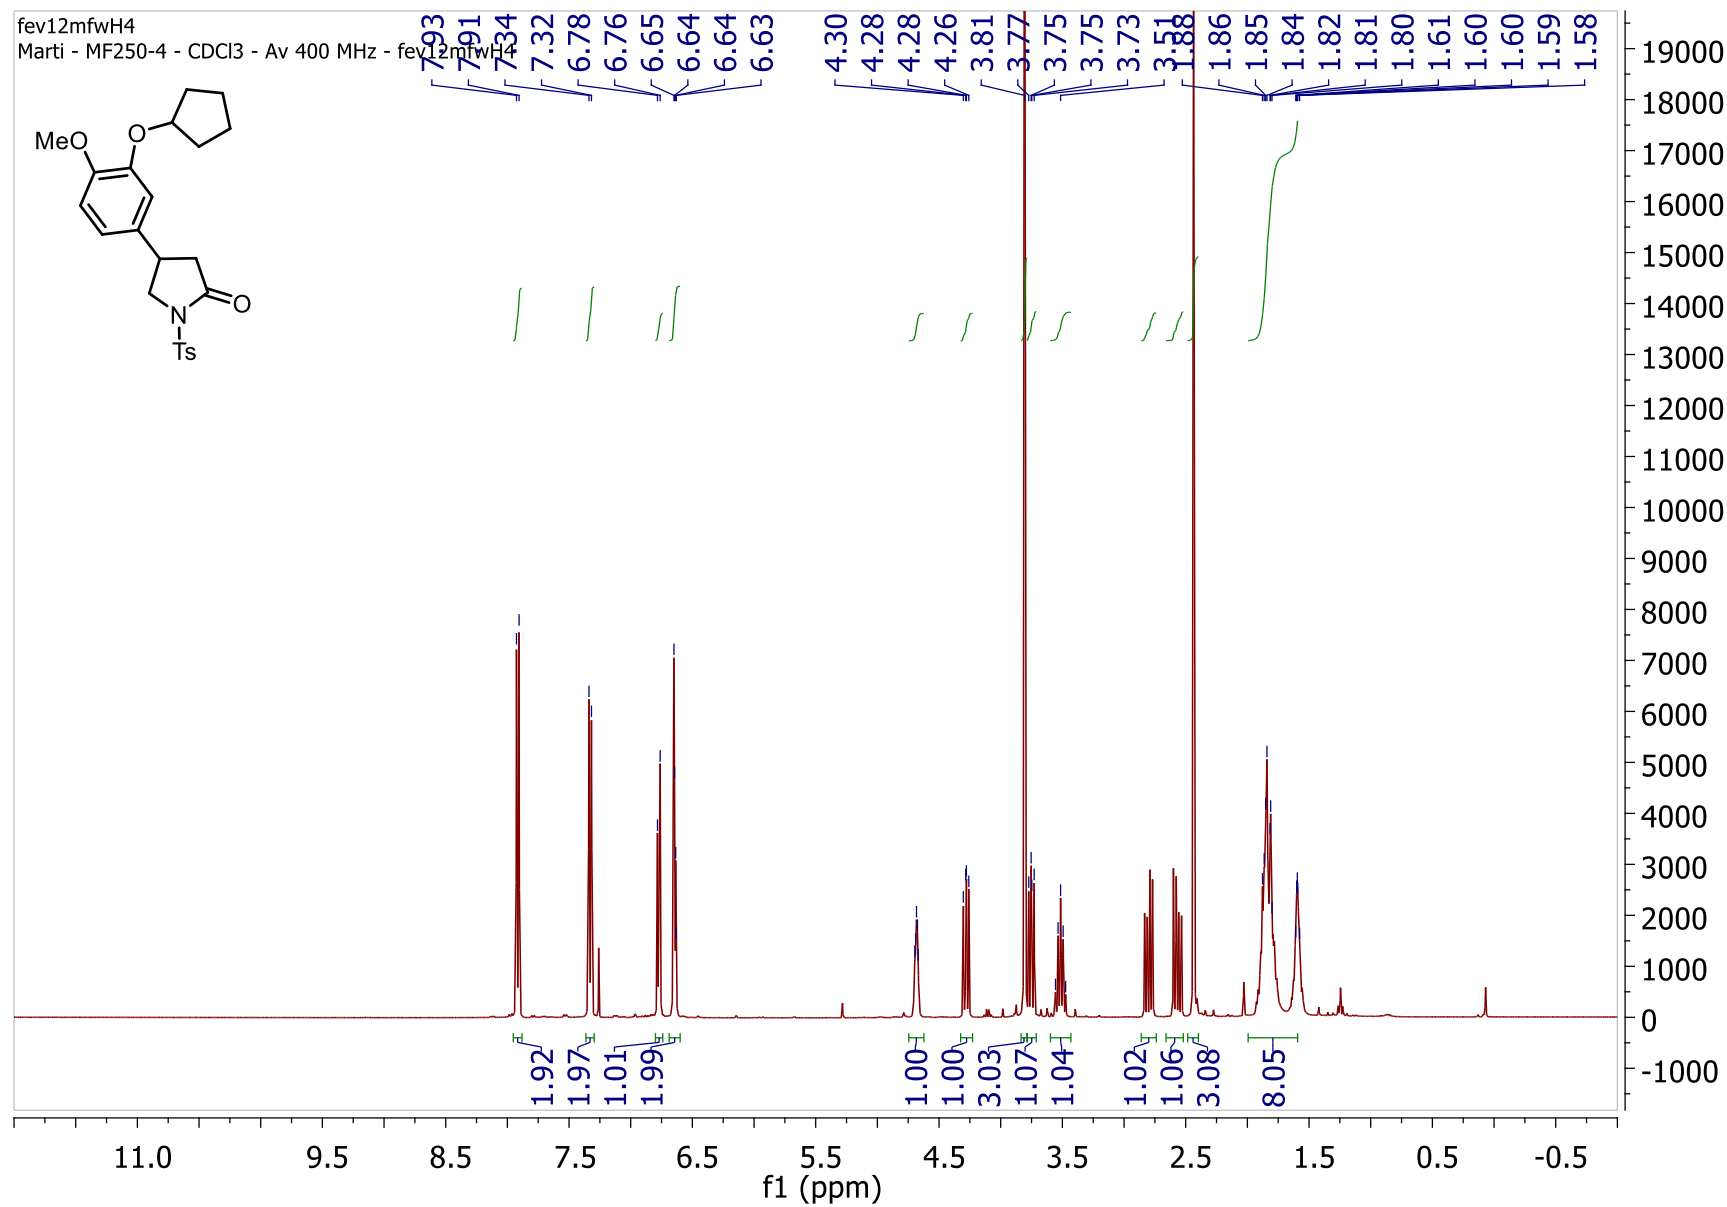

Figure SI48:  $^1\text{H}$  NMR of compound **4bq**.

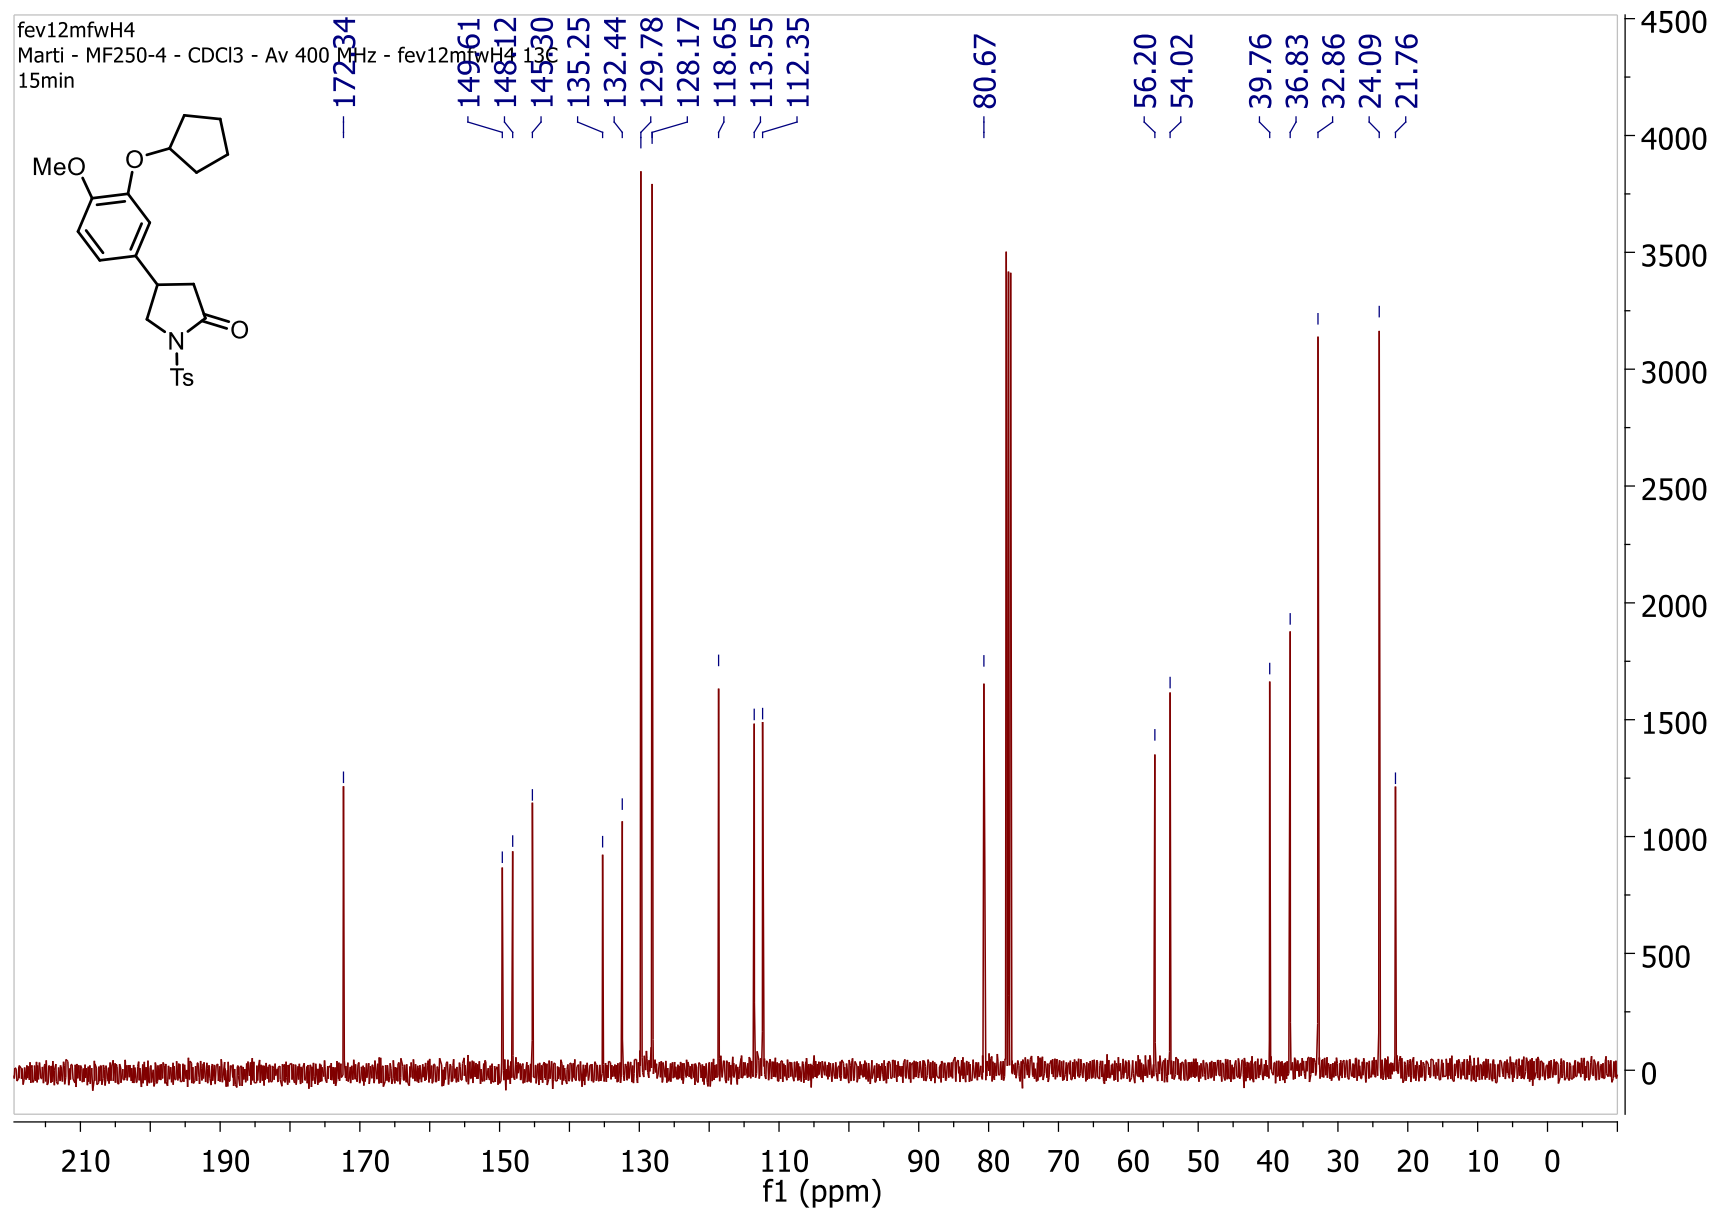

**Figure SI49:**  $^{13}\text{C}$  NMR of compound **4bq**.

dez13agoH2  
Arnaldo - AGO-162-F2 - CDCl3 - Avance 500 MHz - dez13agoH2

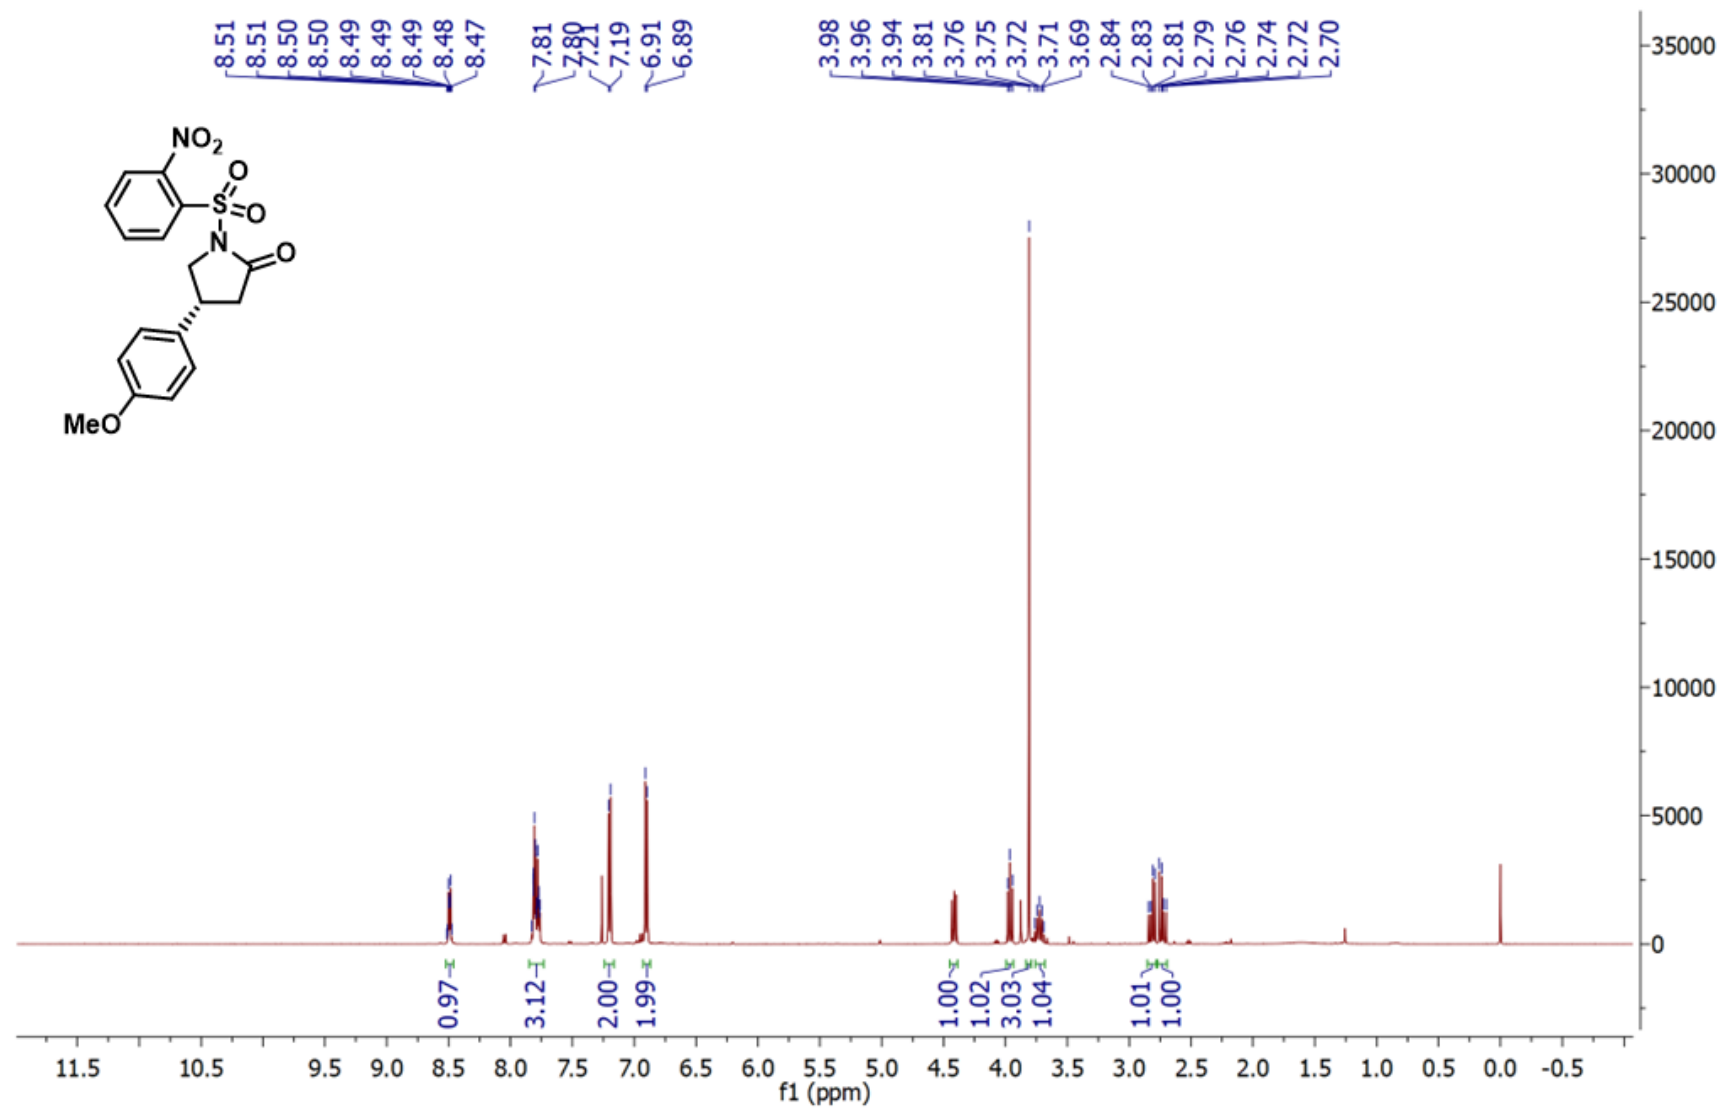

Figure SI50: <sup>1</sup>H NMR of compound **4ca**.

dez13agoH2  
Arnaldo - AGO-162-F2 - CDCl3 - Avance 500 MHz - dez13agoH2 13C  
3 hrs

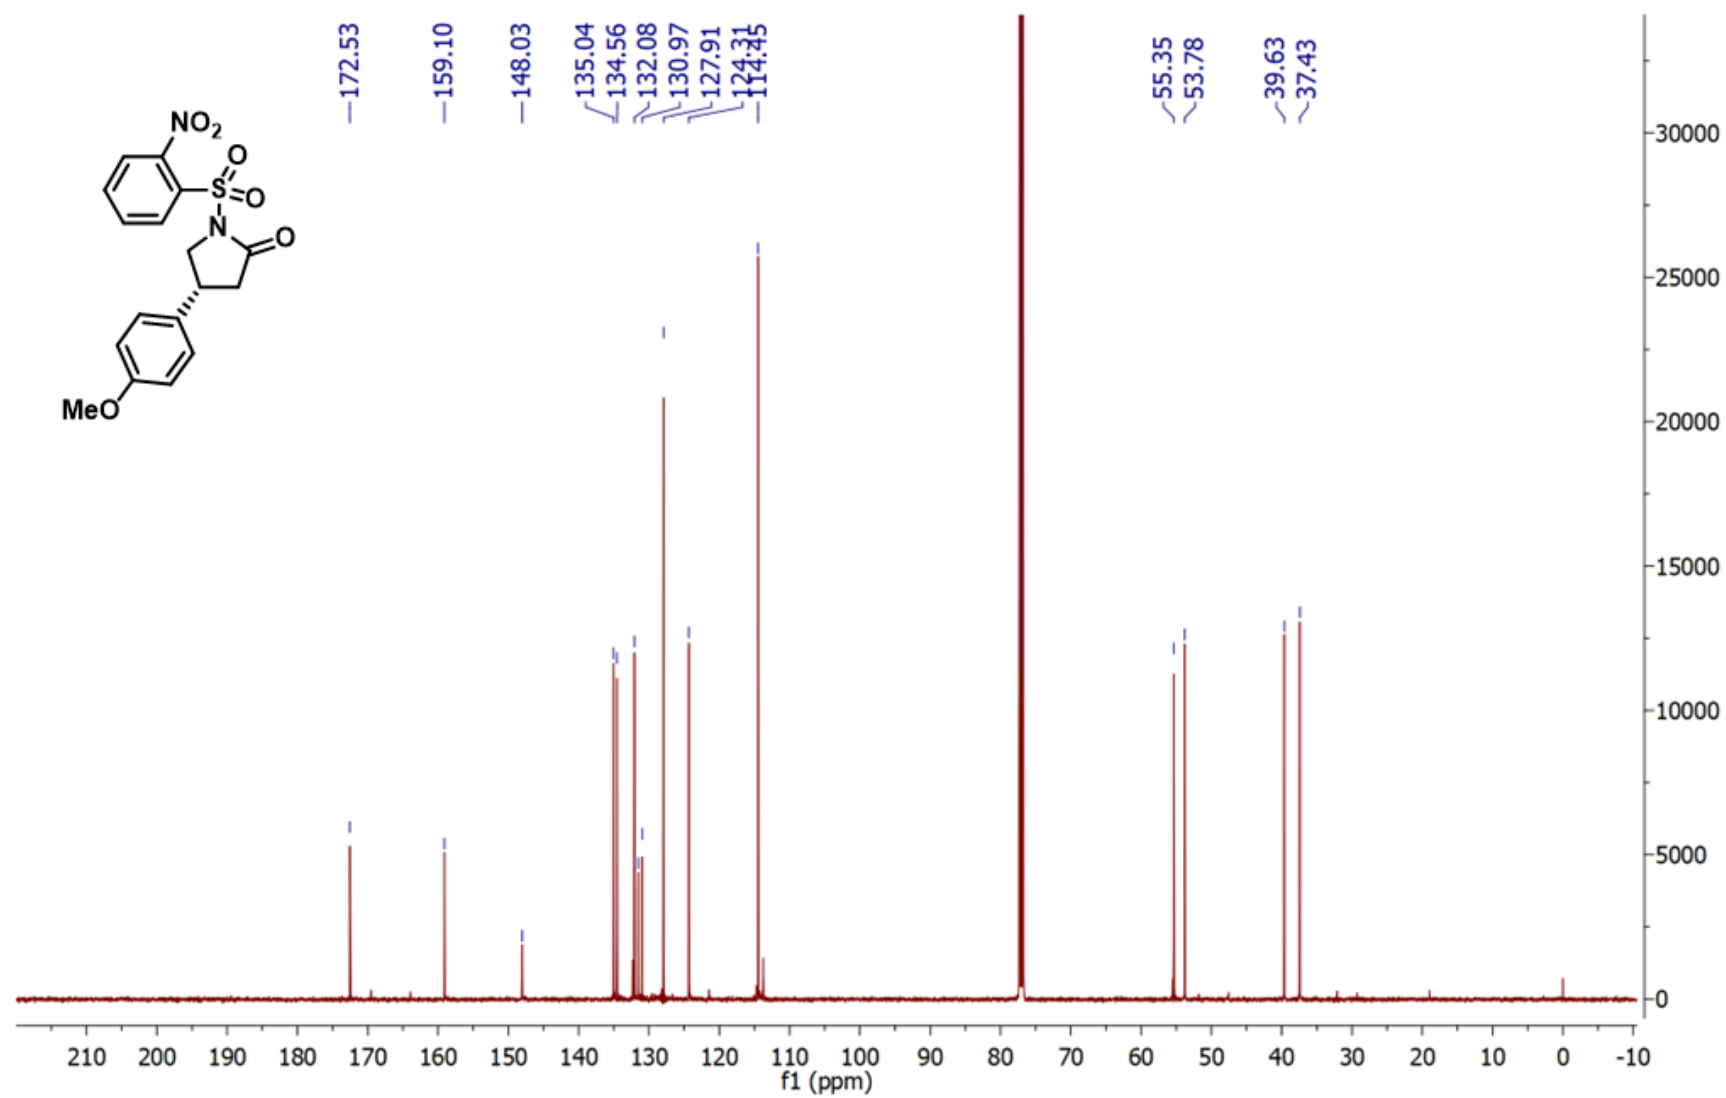

Figure SI51: <sup>13</sup>C NMR of compound 4ca.



dez13agoH1  
Arnaldo - AGO-162-E2 - CDCl3 - Avance 500 MHz - dez13agoH1

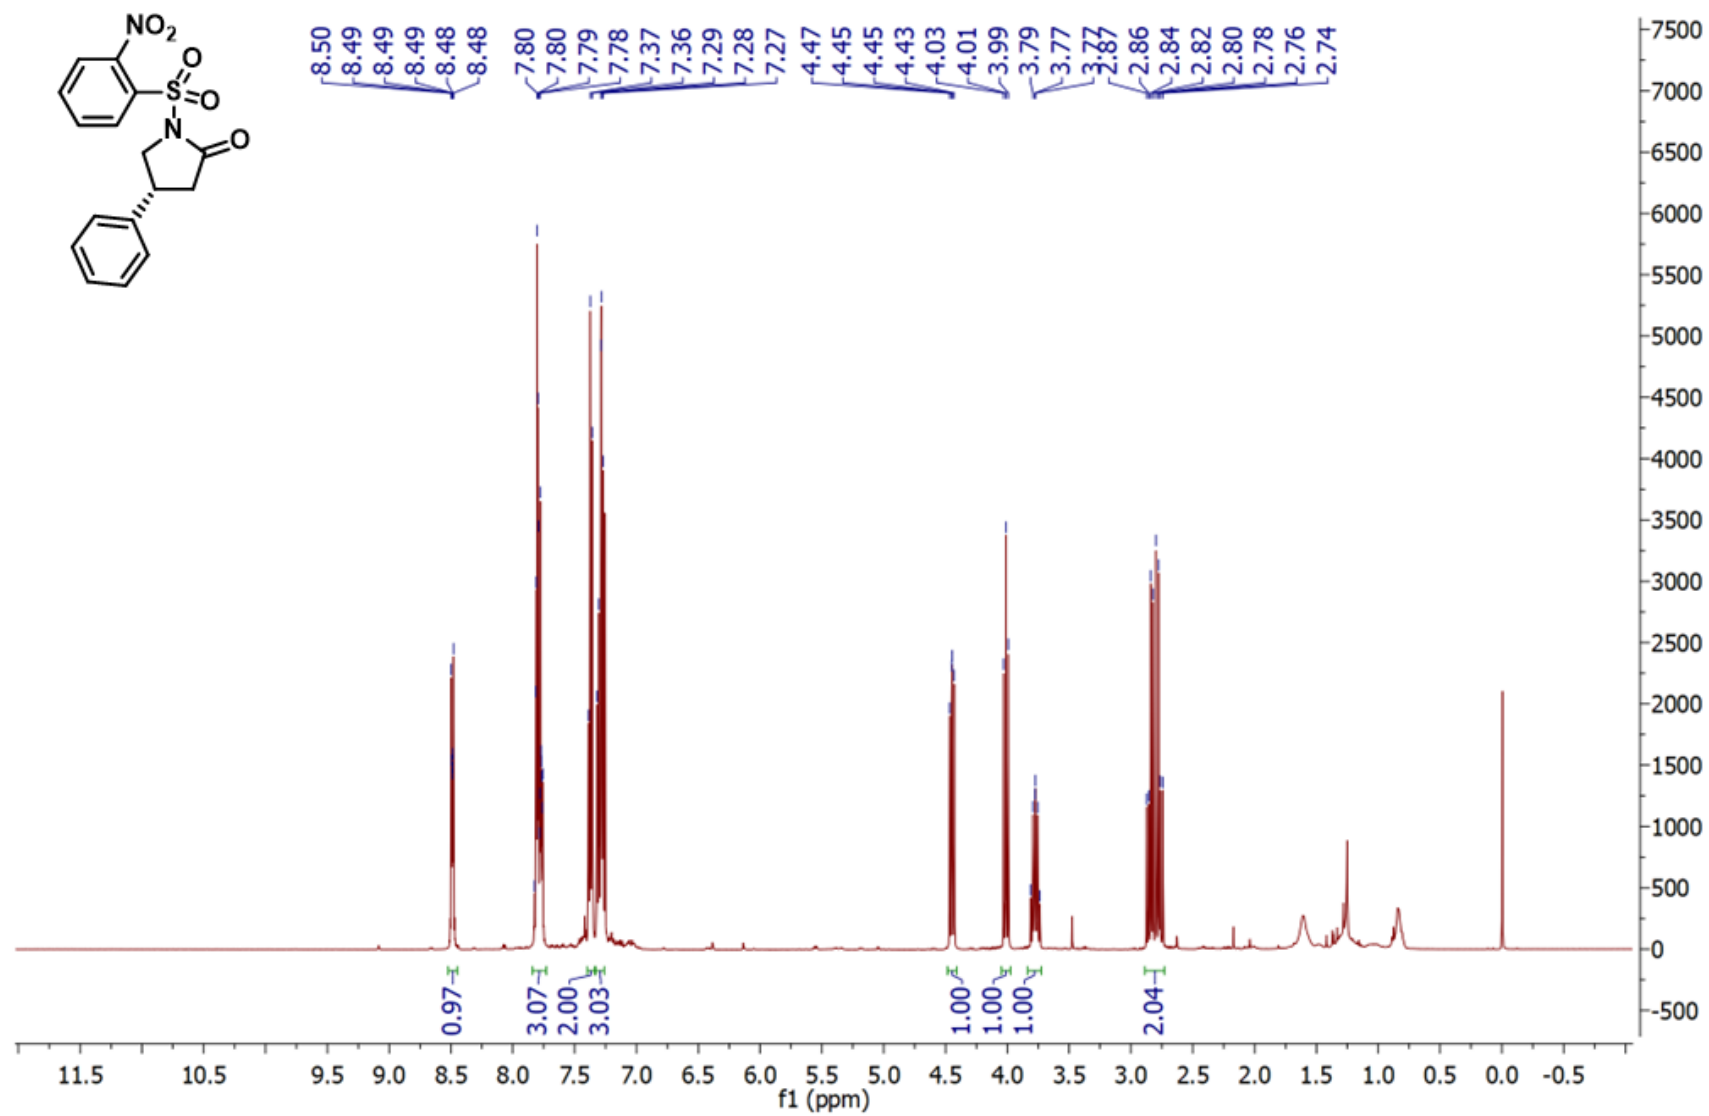

Figure SI52: <sup>1</sup>H NMR of compound 4cb.

dez13agoH1

Arnaldo - AGO-162-E2 - CDCl<sub>3</sub> - Avance 500 MHz - dez13agoH1 13C

3 hrs

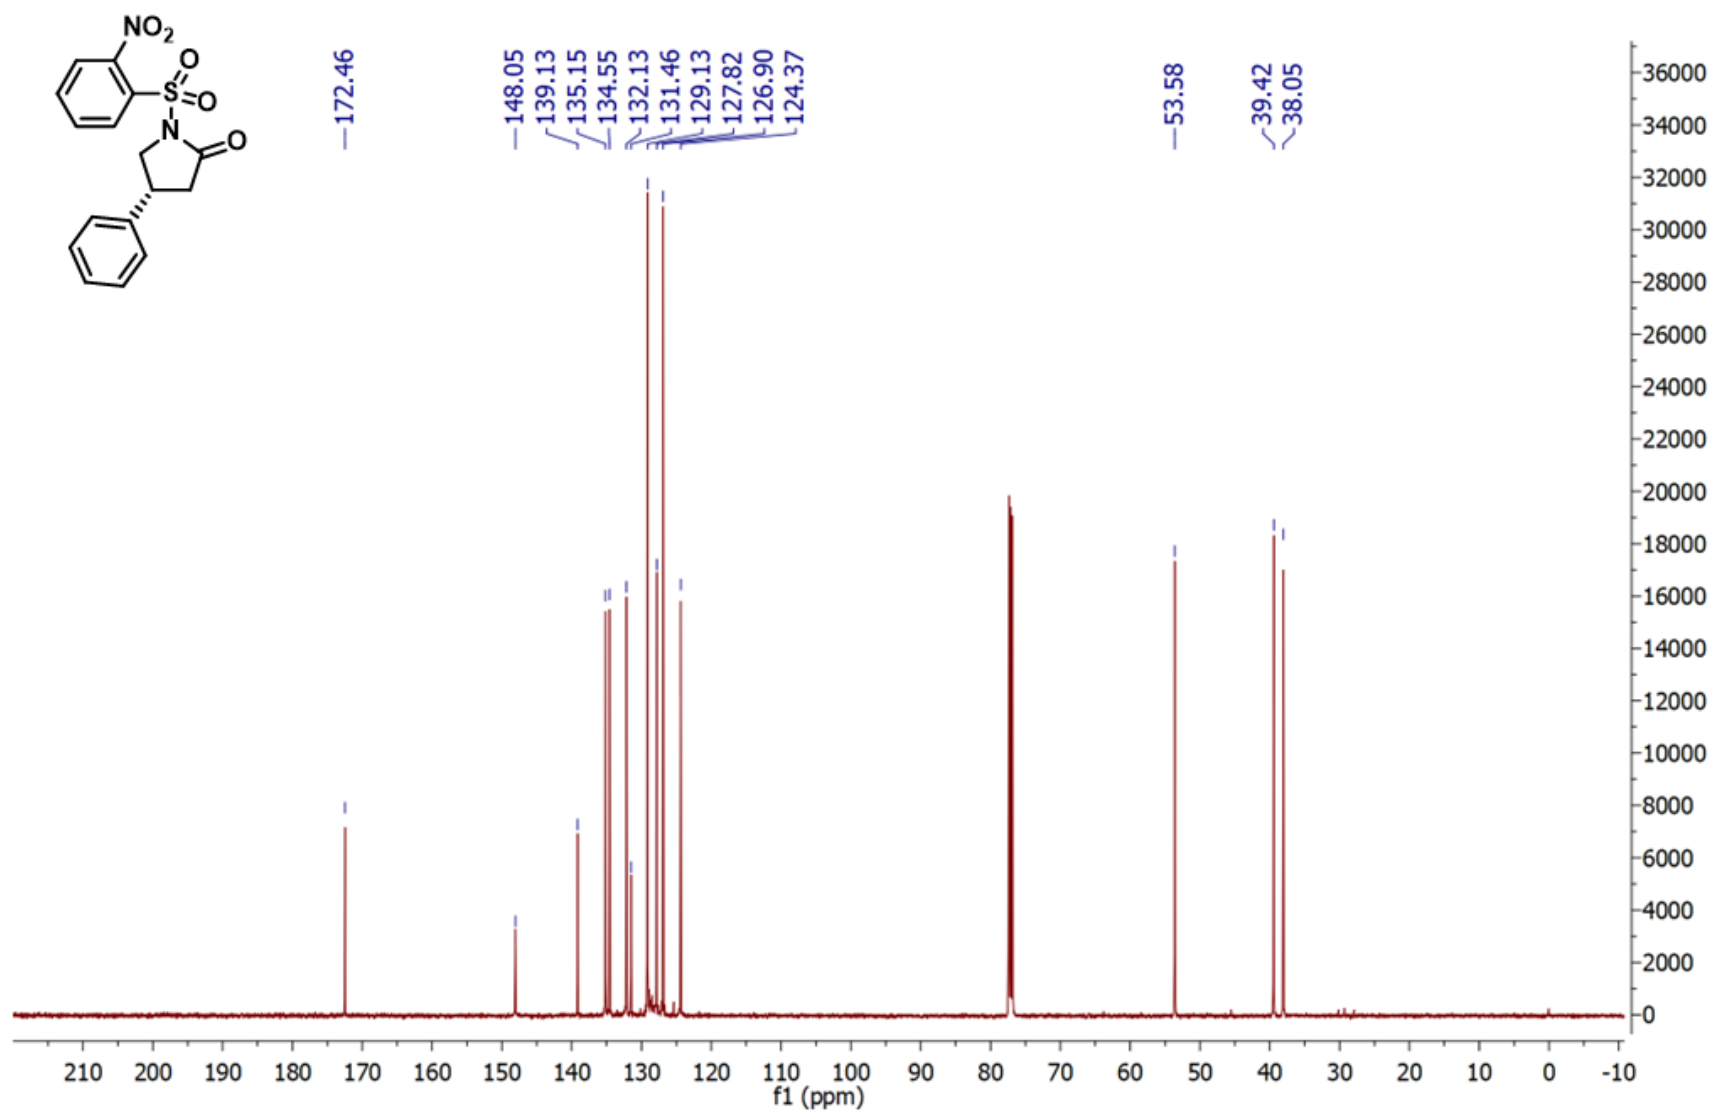

Figure SI53: <sup>13</sup>C NMR of compound 4cb.

dez12agoH1  
AGO-162 - D2 - Arnaldo Oliveira - Avance 500 MHz - CDCl<sub>3</sub>

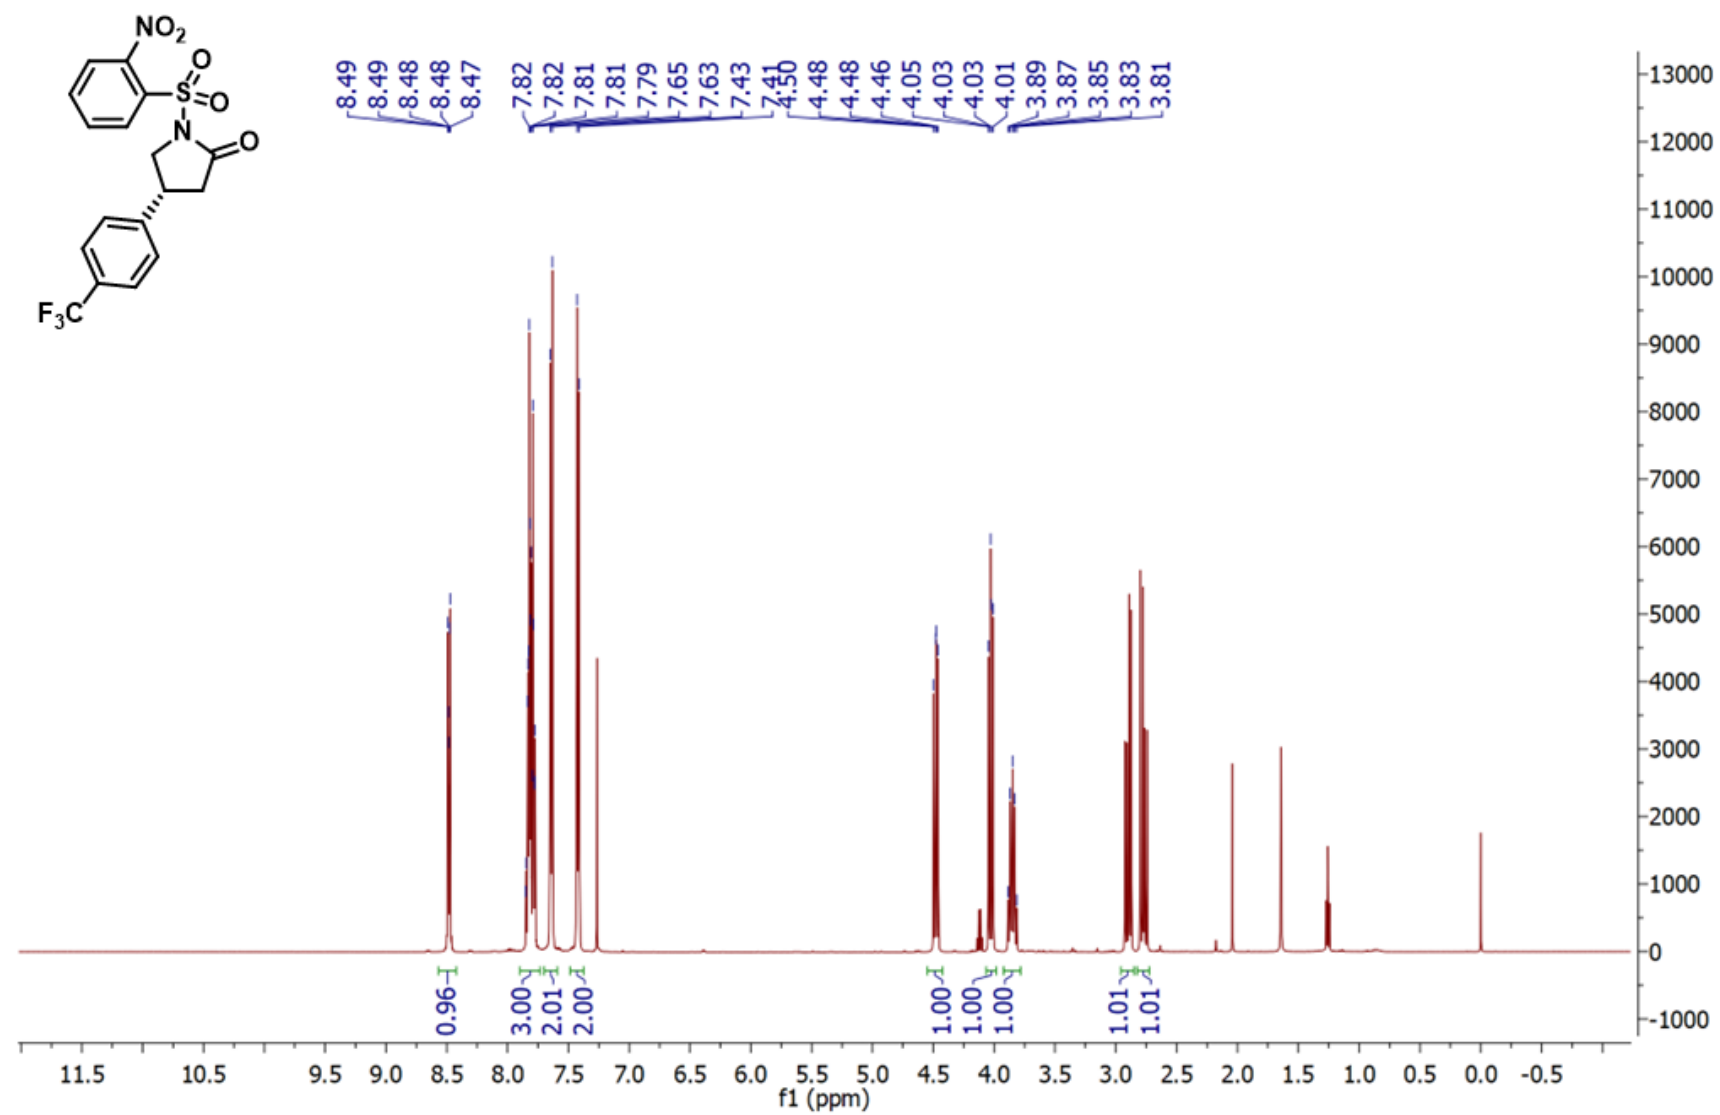

Figure SI54: <sup>1</sup>H NMR of compound **4cc**.

dez12agoH1

AGO-162 - D2 - Arnaldo Oliveira - Avance 500 MHz - CDCl<sub>3</sub> 13C

3 hrs

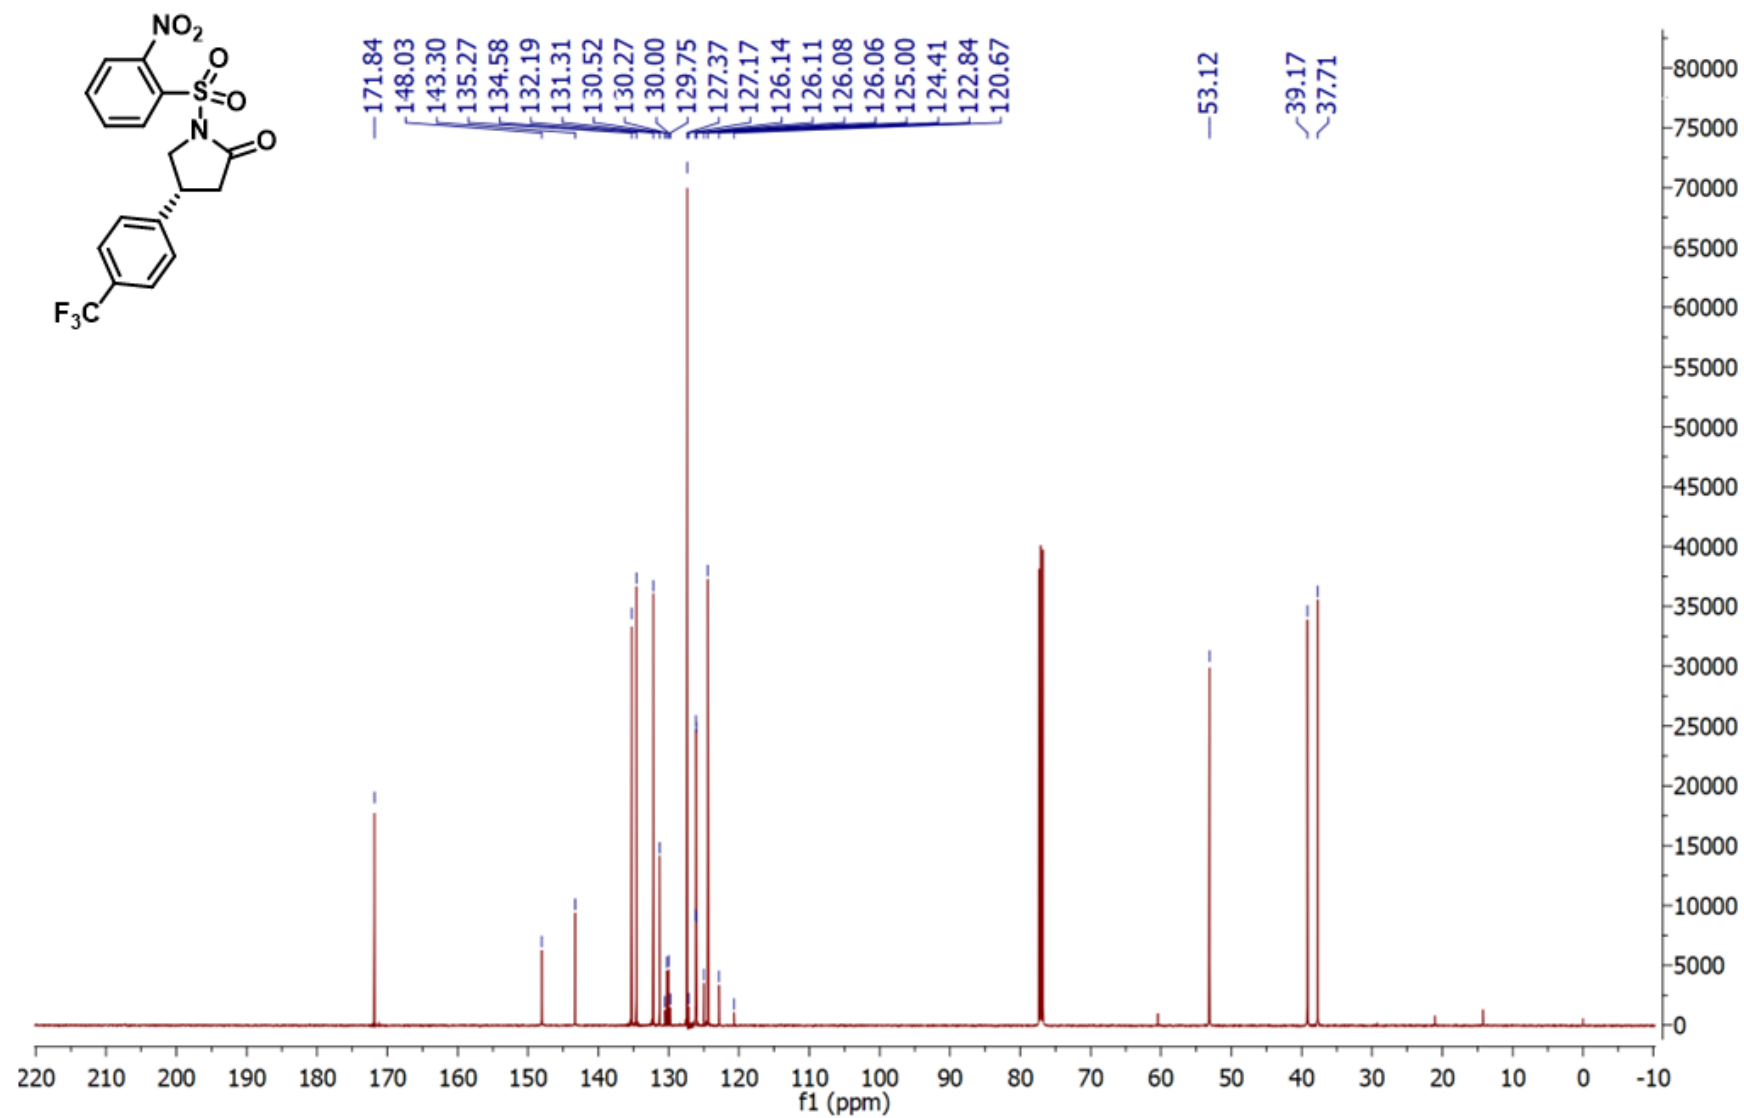

Figure SI55: <sup>13</sup>C NMR of compound 4cc.

dez12agoH1

AGO-162 - D2 - Arnaldo Oliveira - Avance 500 MHz - CDCl<sub>3</sub> 19F

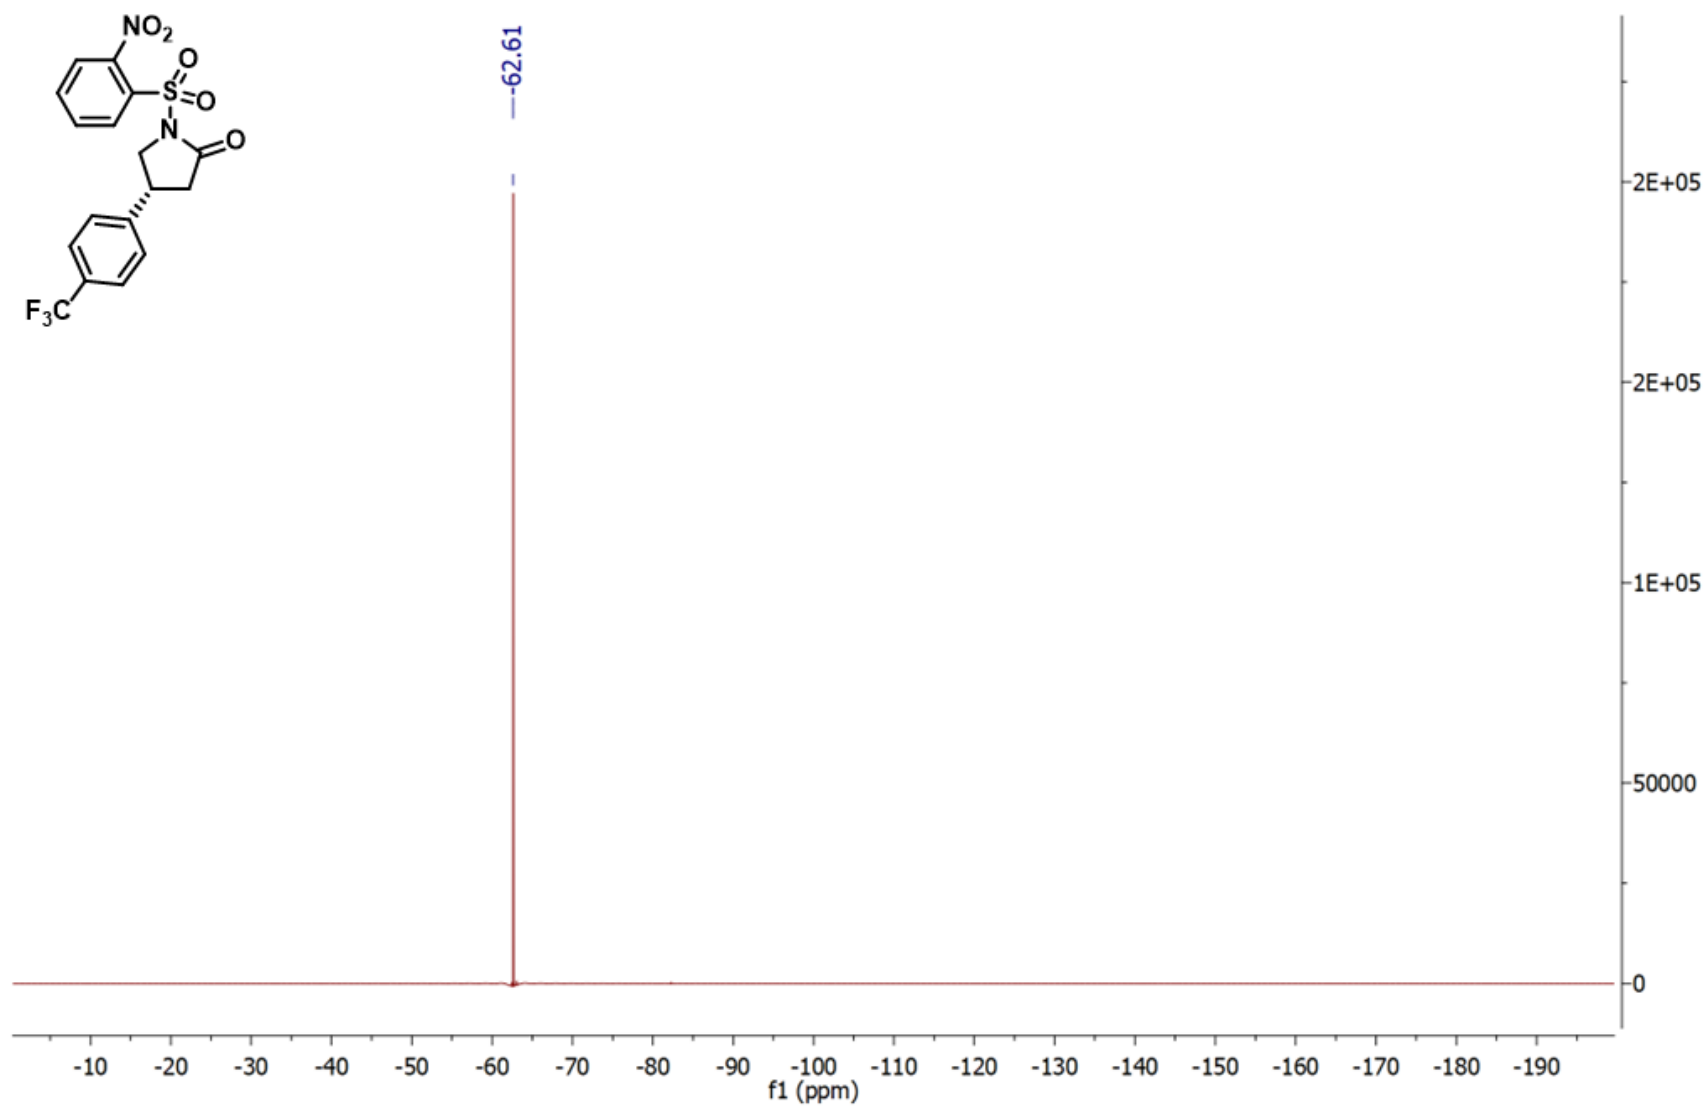

**Figure SI56:** <sup>19</sup>F NMR of compound 4cc.

dez11agoH1  
Arnaldo - 162-C2 - CDCl3 - Avance 500 MHz - dez11agoH1

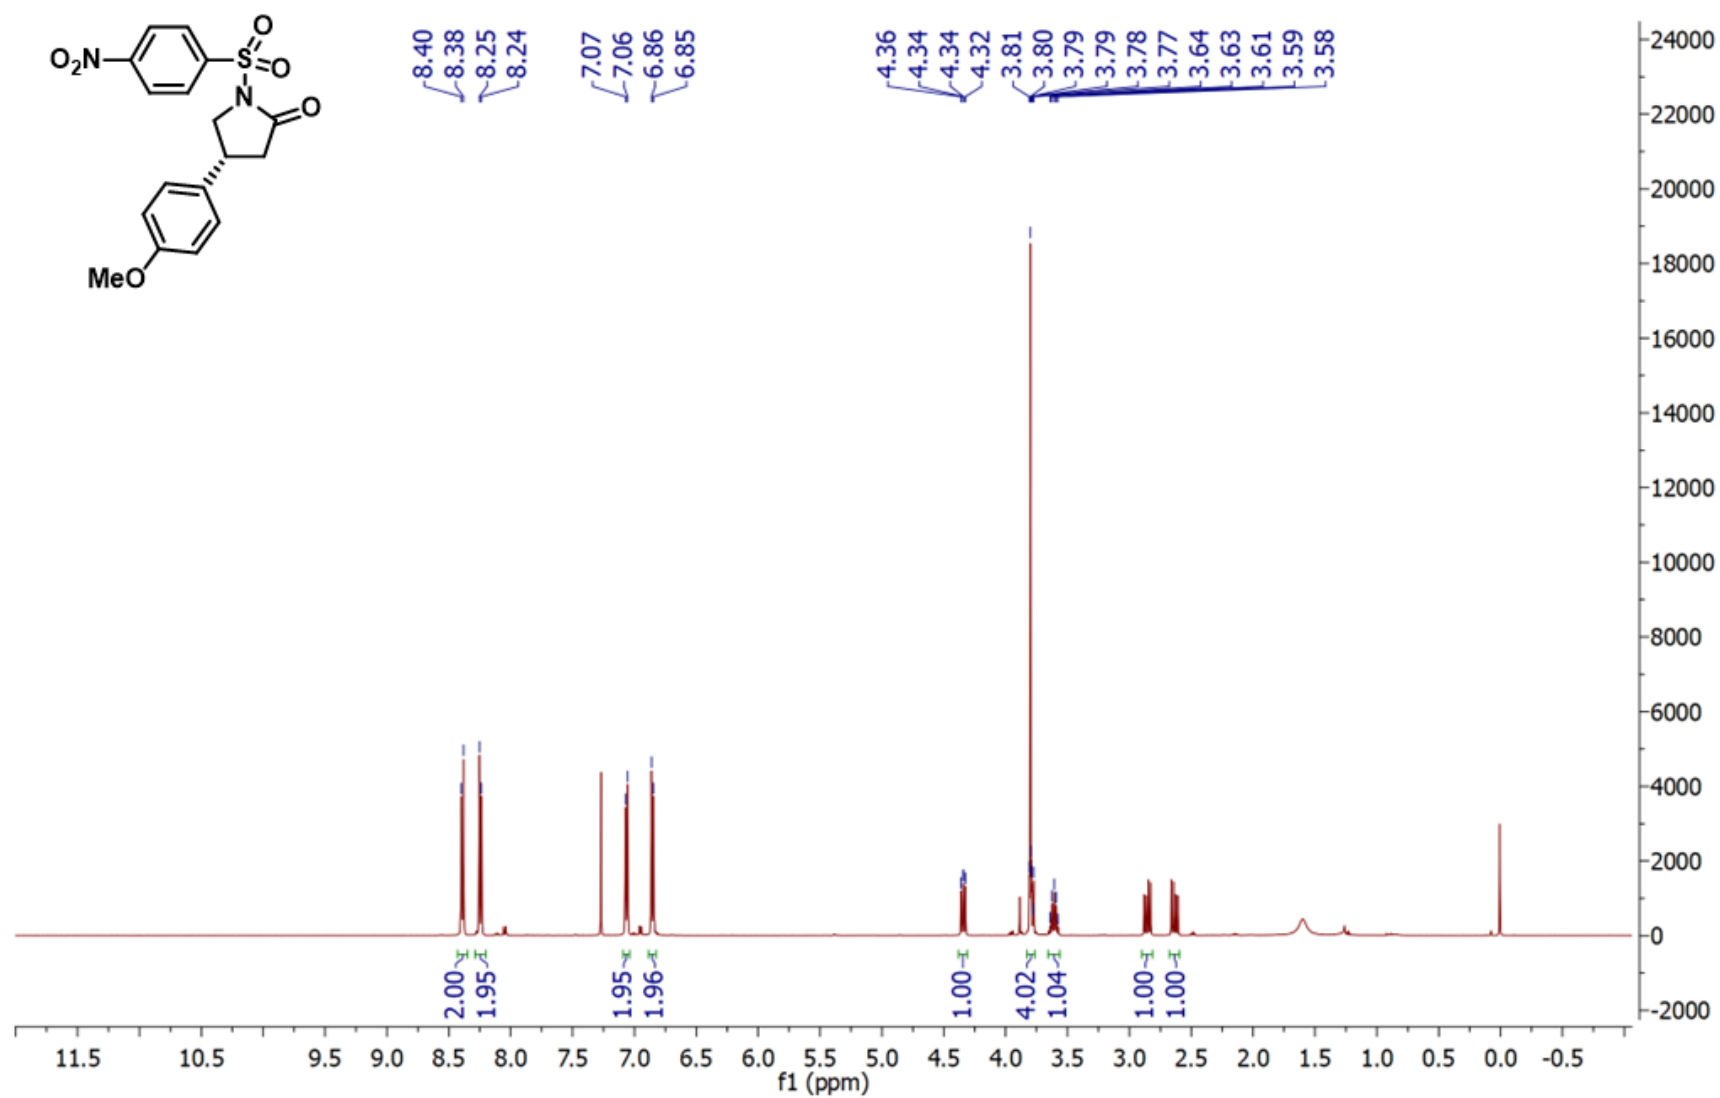

Figure SI57: <sup>1</sup>H NMR of compound **4da**.

dez11agoH1  
Arnaldo - 162-C2 - CDCl3 - Avance 500 MHz - dez11agoH1 13C  
4 hrs

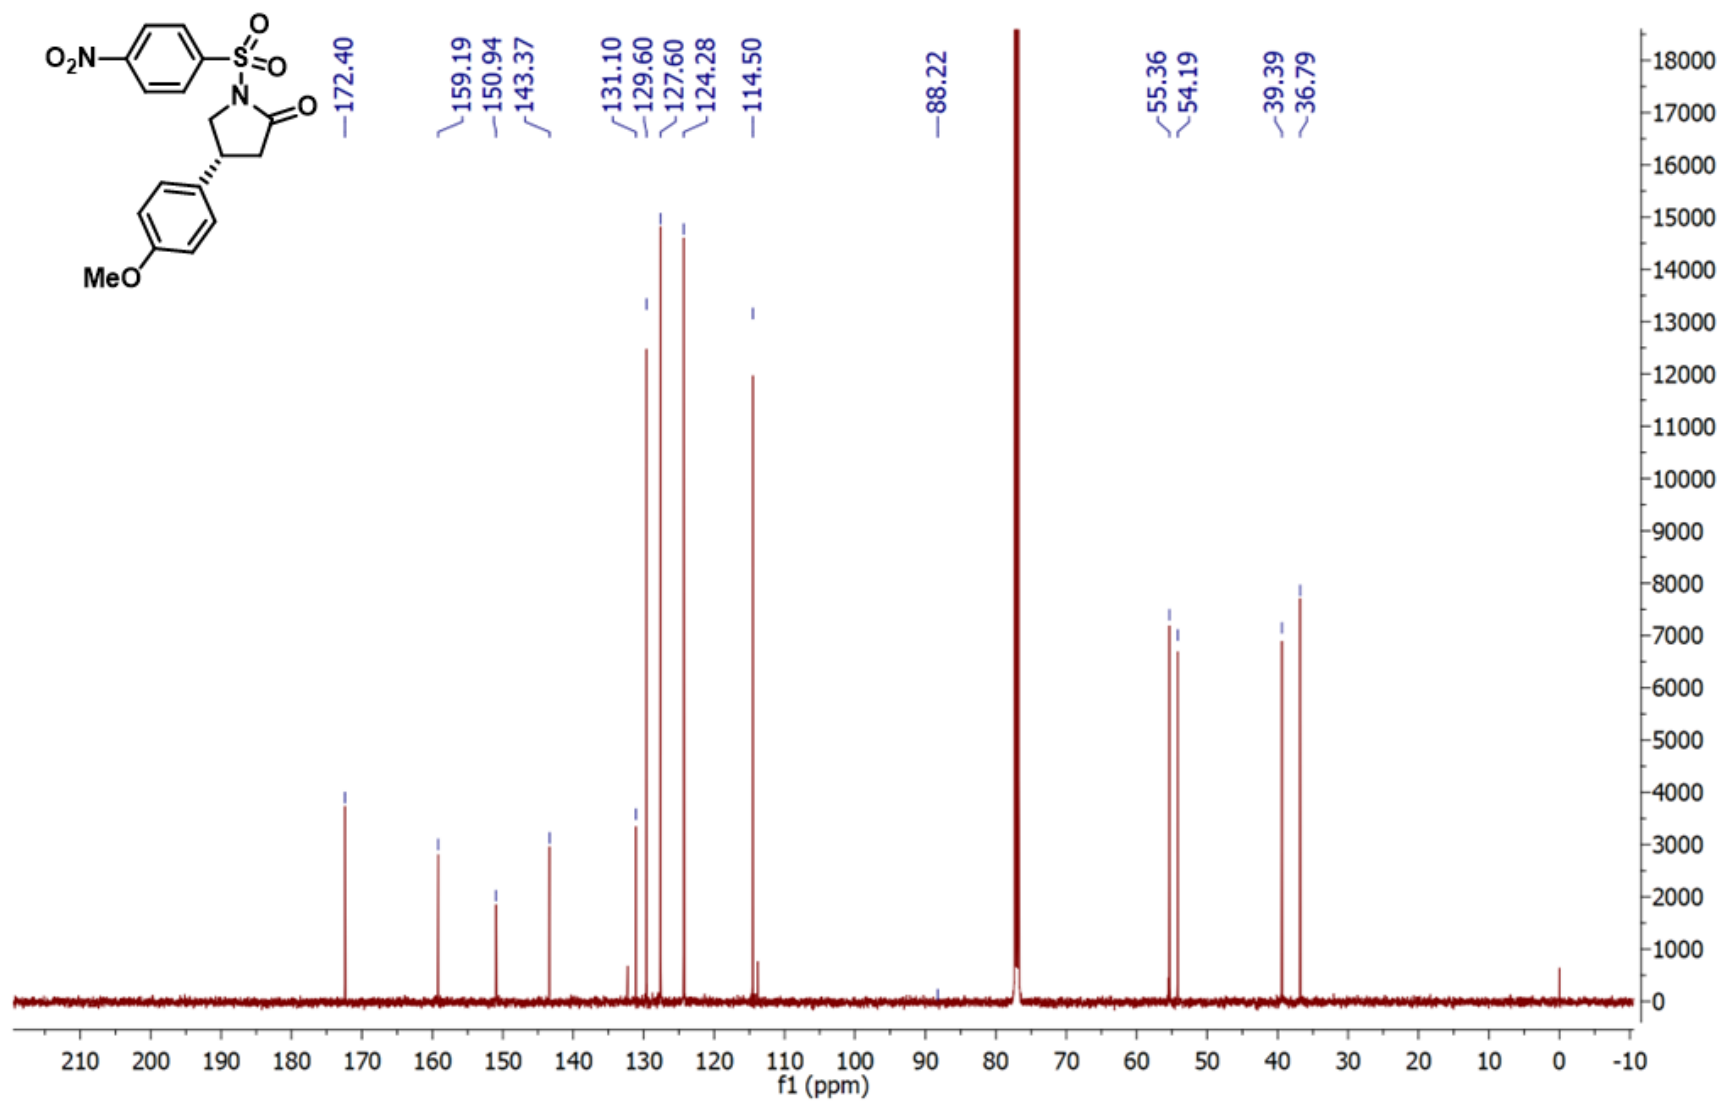

Figure SI58: <sup>13</sup>C NMR of compound 4da.

dez12agoH2  
 AGO-162 - B2 - Arnaldo Oliveira - Avance 500 MHz - CDCl<sub>3</sub>

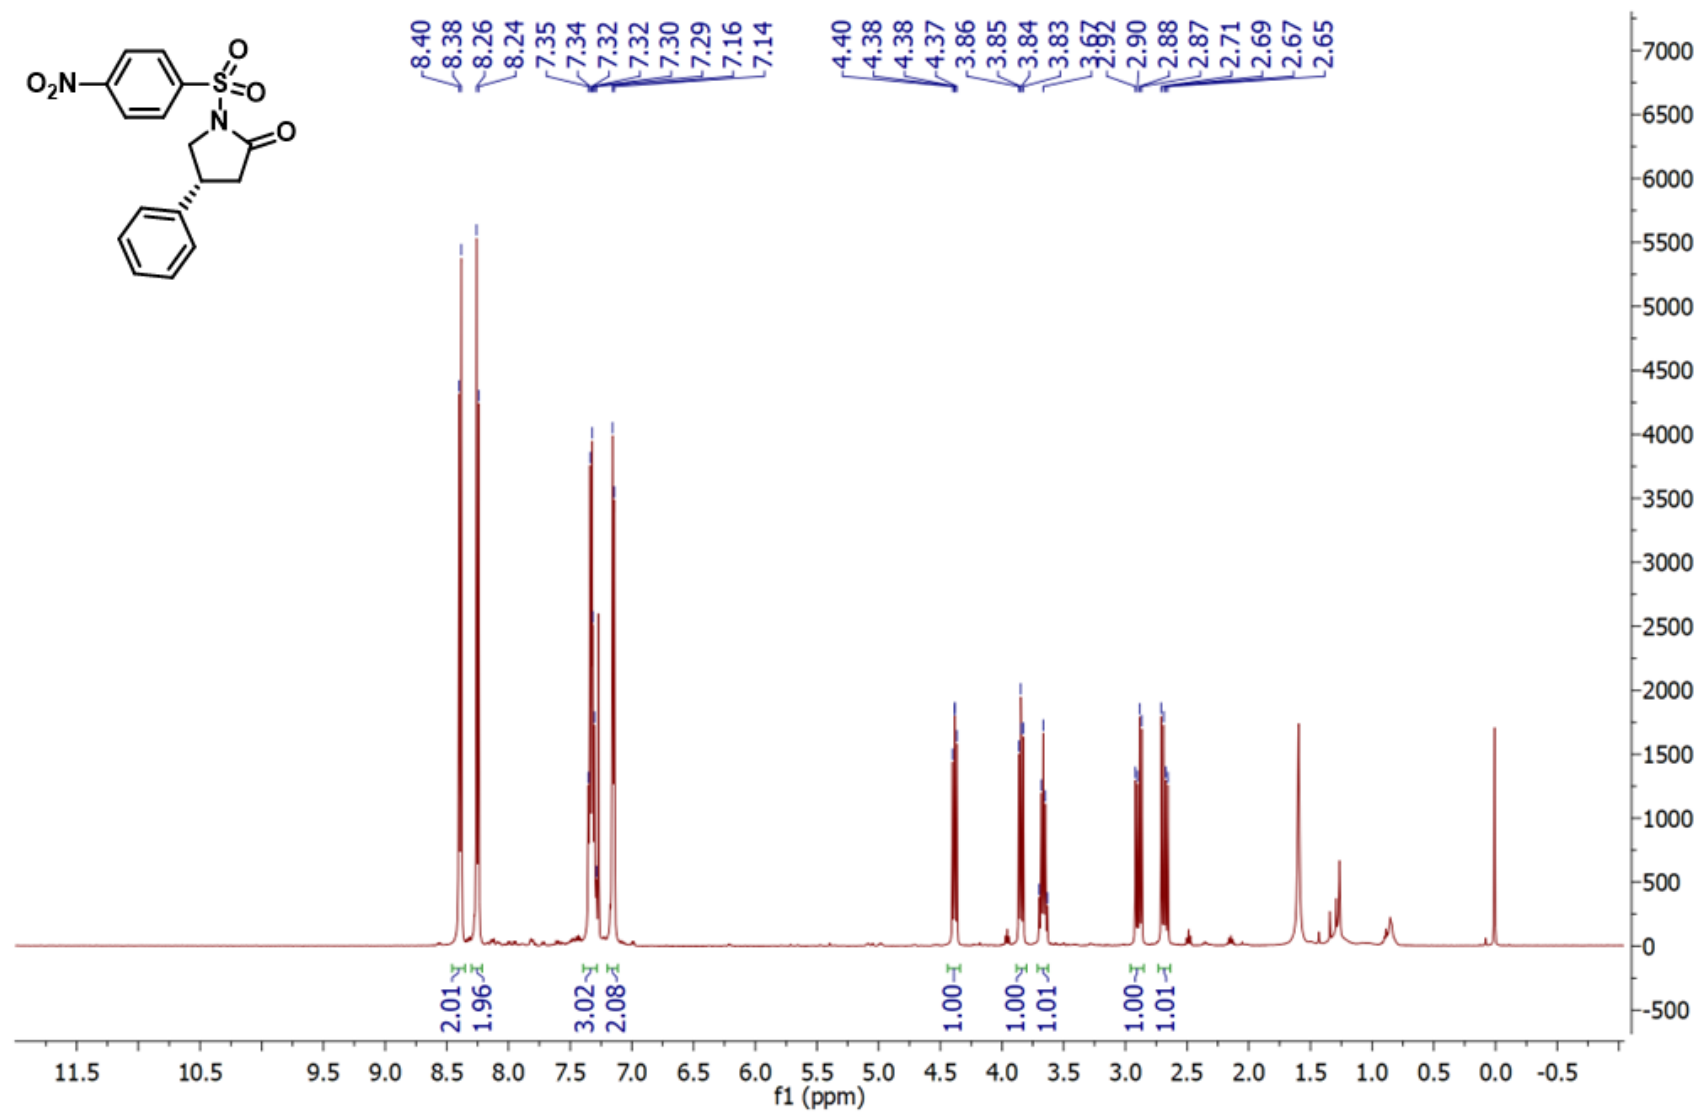

**Figure SI59:** <sup>1</sup>H NMR of compound 4db.



dez12agoH2  
AGO-162 - B2 - Arnaldo Oliveira - Avance 500 MHz - CDCl3 13C  
3 hrs

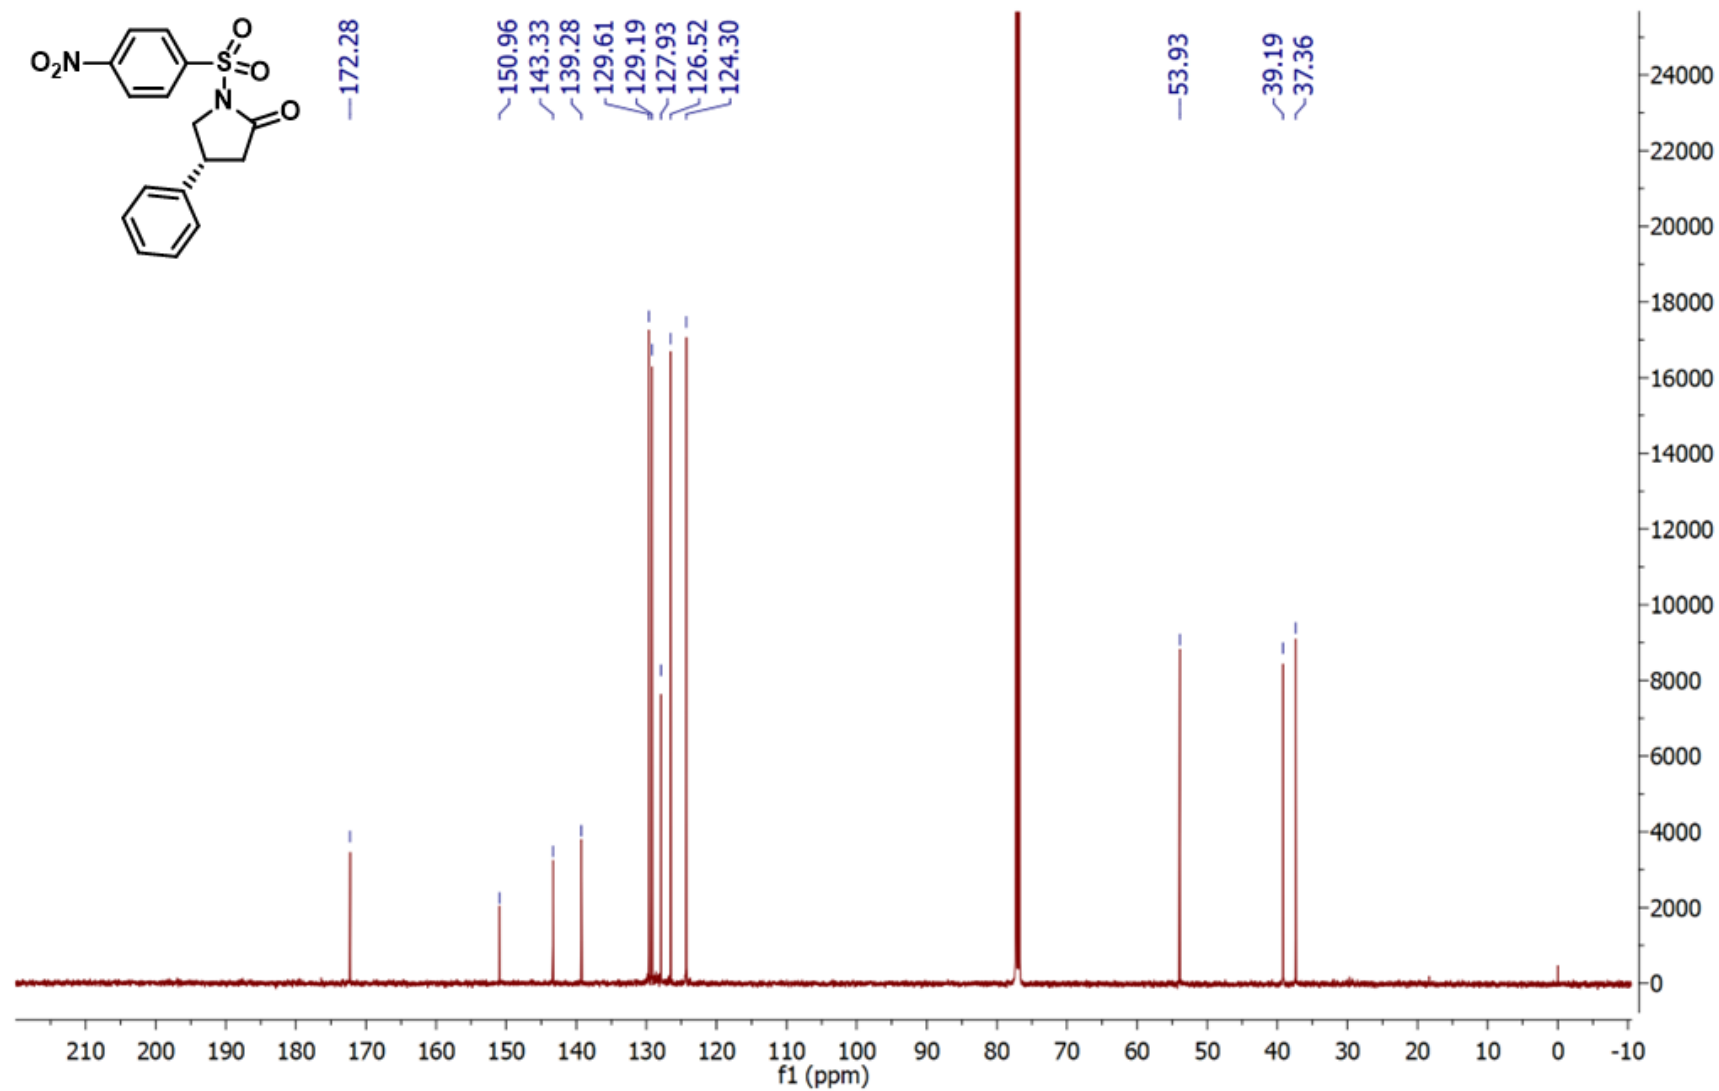

Figure SI60: <sup>13</sup>C NMR of compound 4db.

dez12agoH3  
 AGO-162 - A2 - Amaldo Oliveira - Avance 500 MHz - CDCl<sub>3</sub>

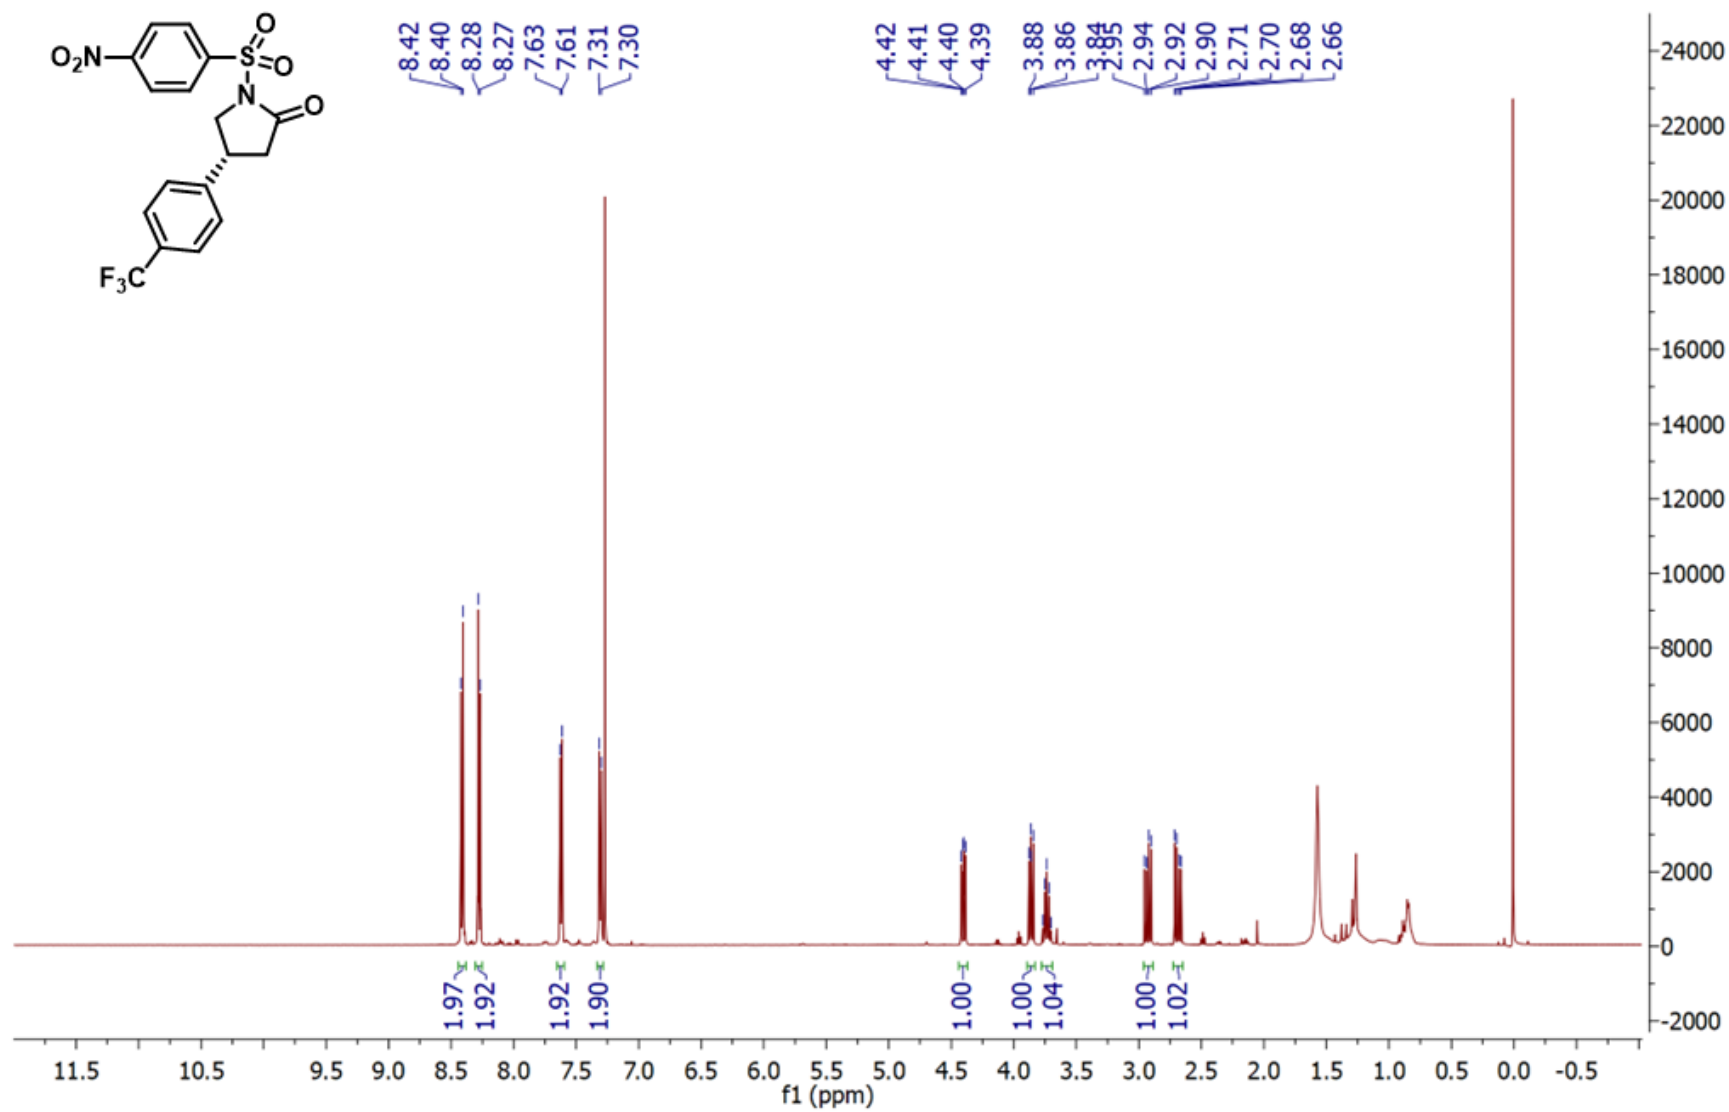

**Figure SI61:** <sup>1</sup>H NMR of compound **4dc**.

dez12agoH3  
AGO-162 - A2 - Arnaldo Oliveira - Avance 500 MHz - CDCl<sub>3</sub> 13C  
12 hrs

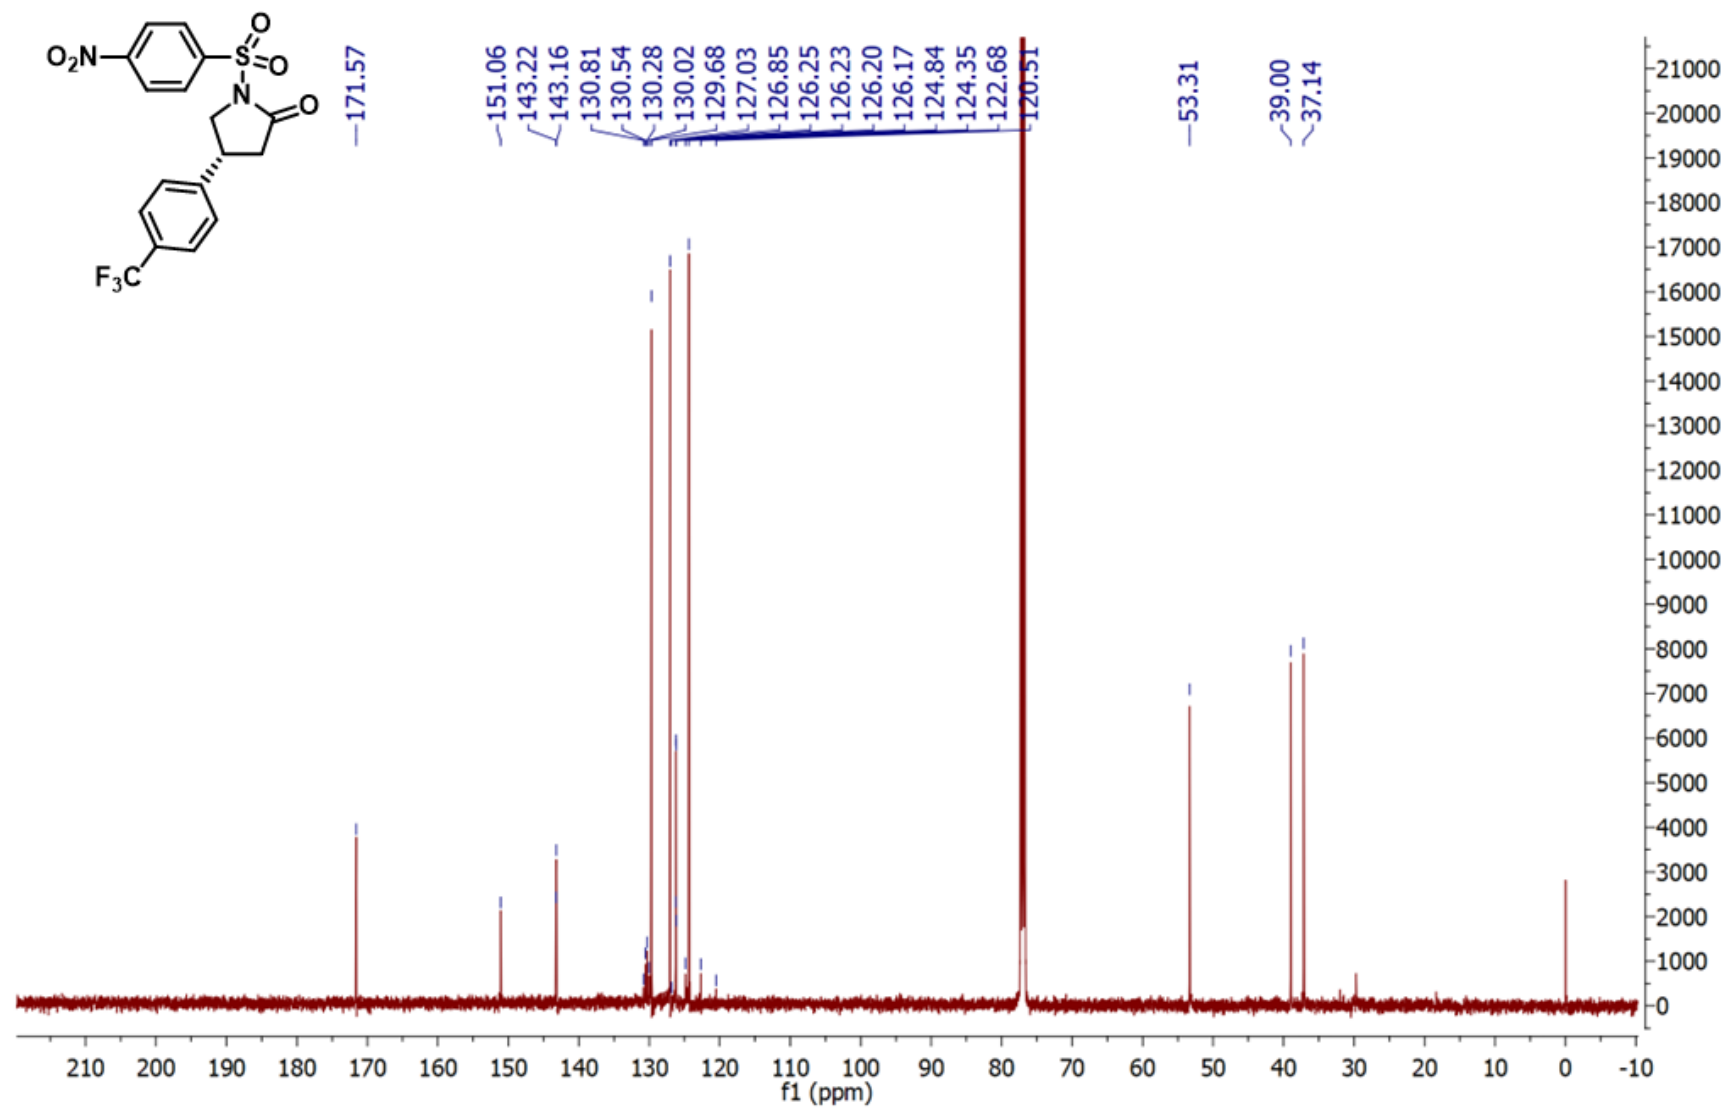

Figure SI62: <sup>13</sup>C NMR of compound 4dc.

dez12agoH3  
AGO-162 - A2 - Arnaldo Oliveira - Avance 500 MHz - CDCl<sub>3</sub> 19F

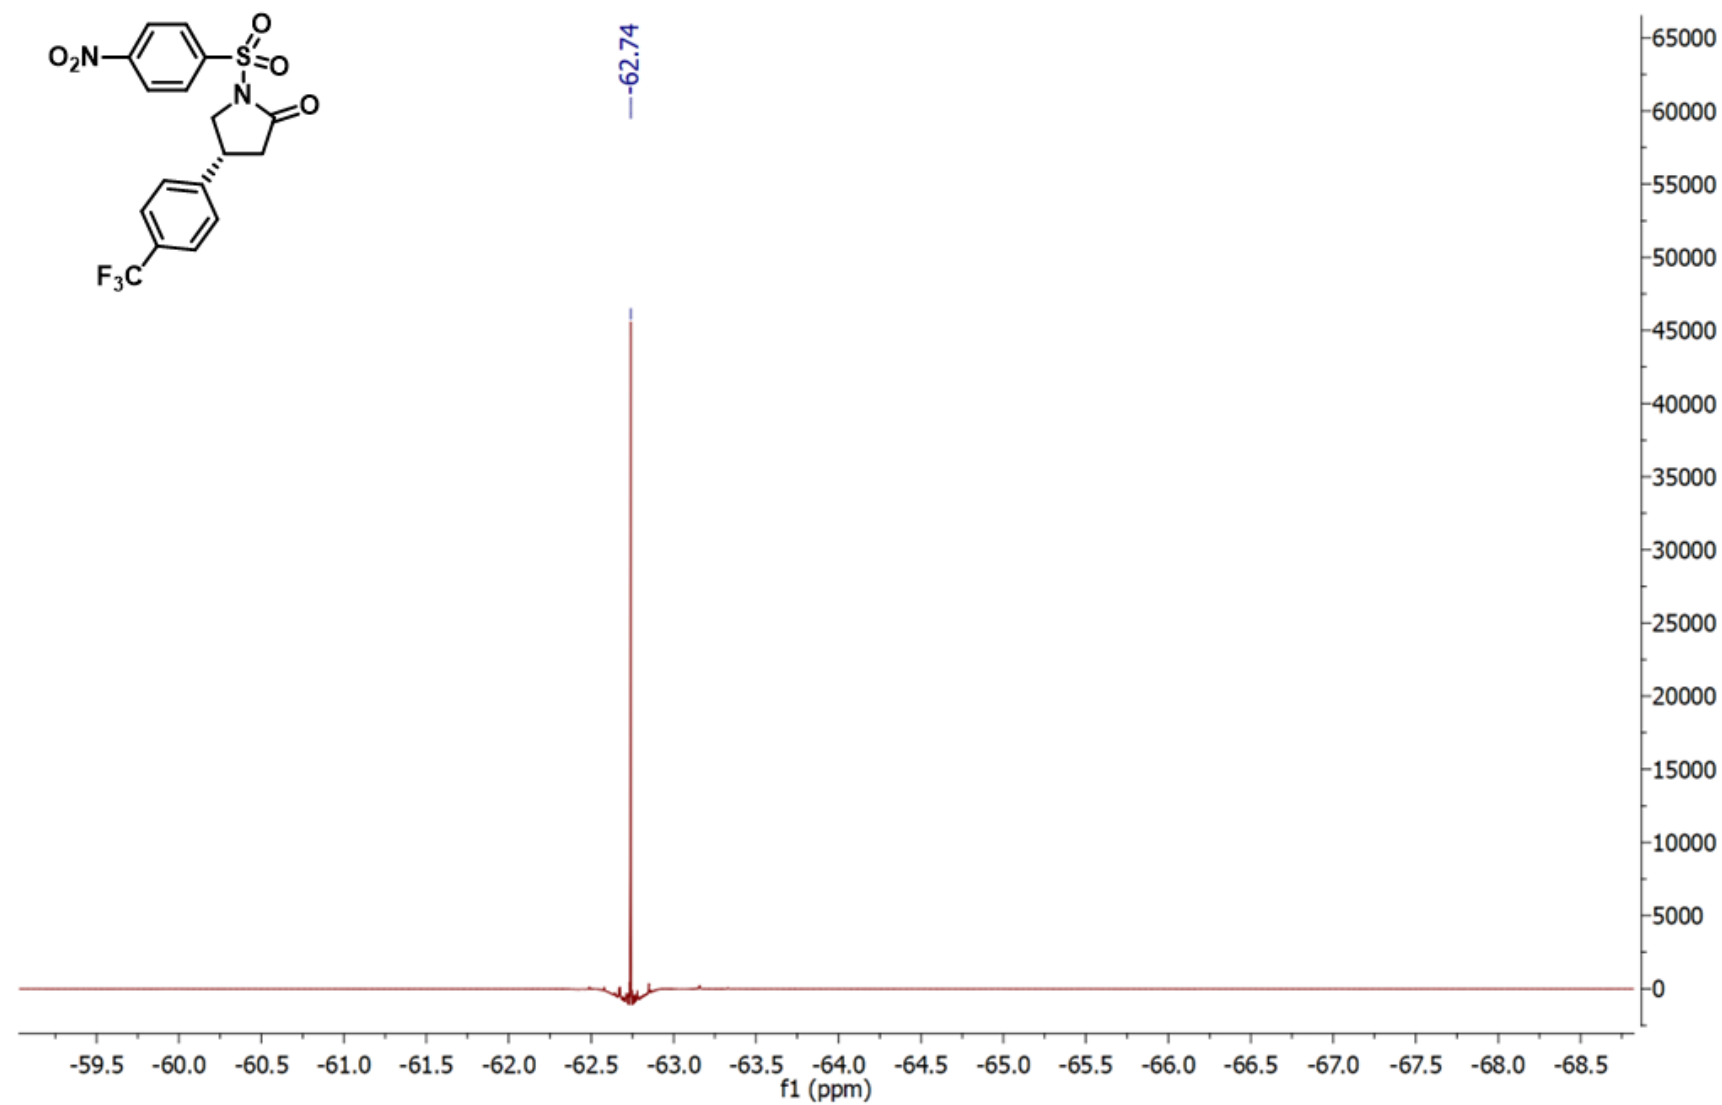

**Figure SI63:** <sup>19</sup>F NMR of compound **4dc**.

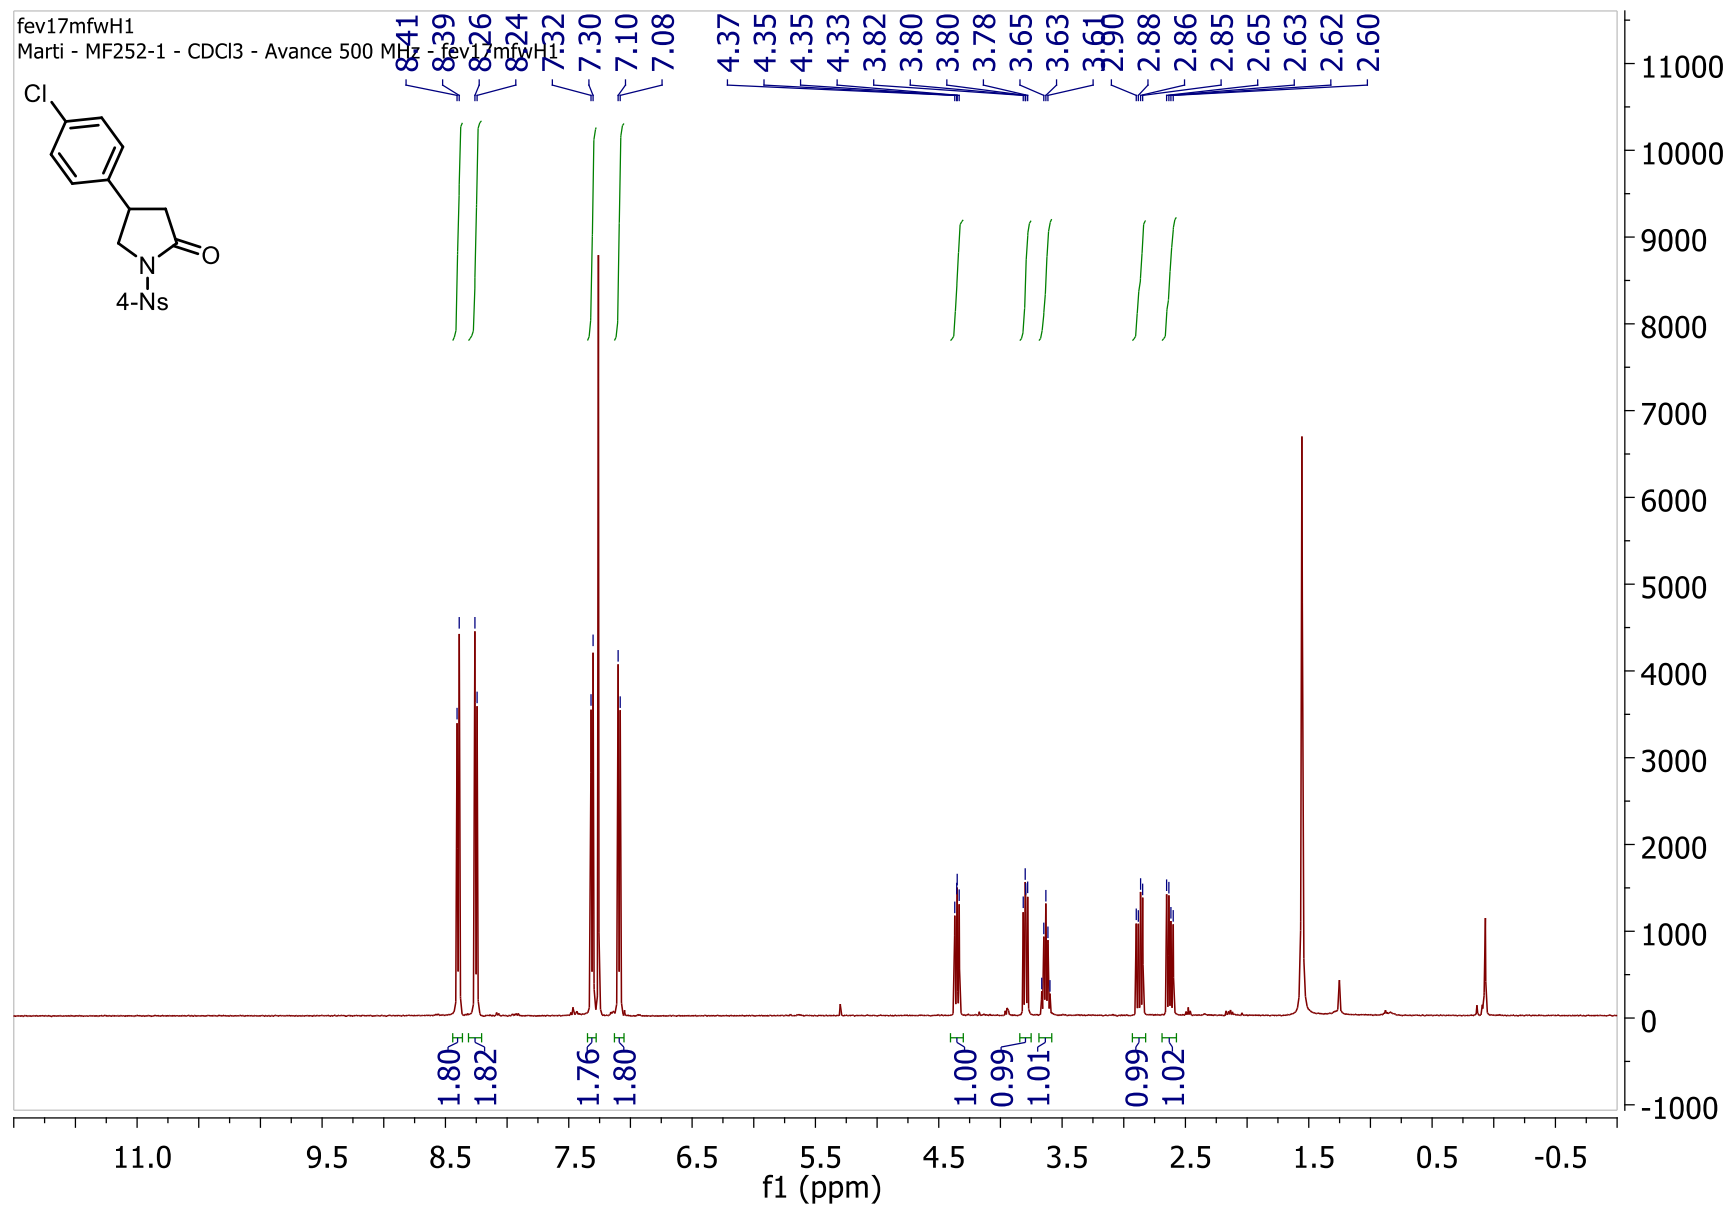

**Figure SI64:** <sup>1</sup>H NMR of compound **4dd**.

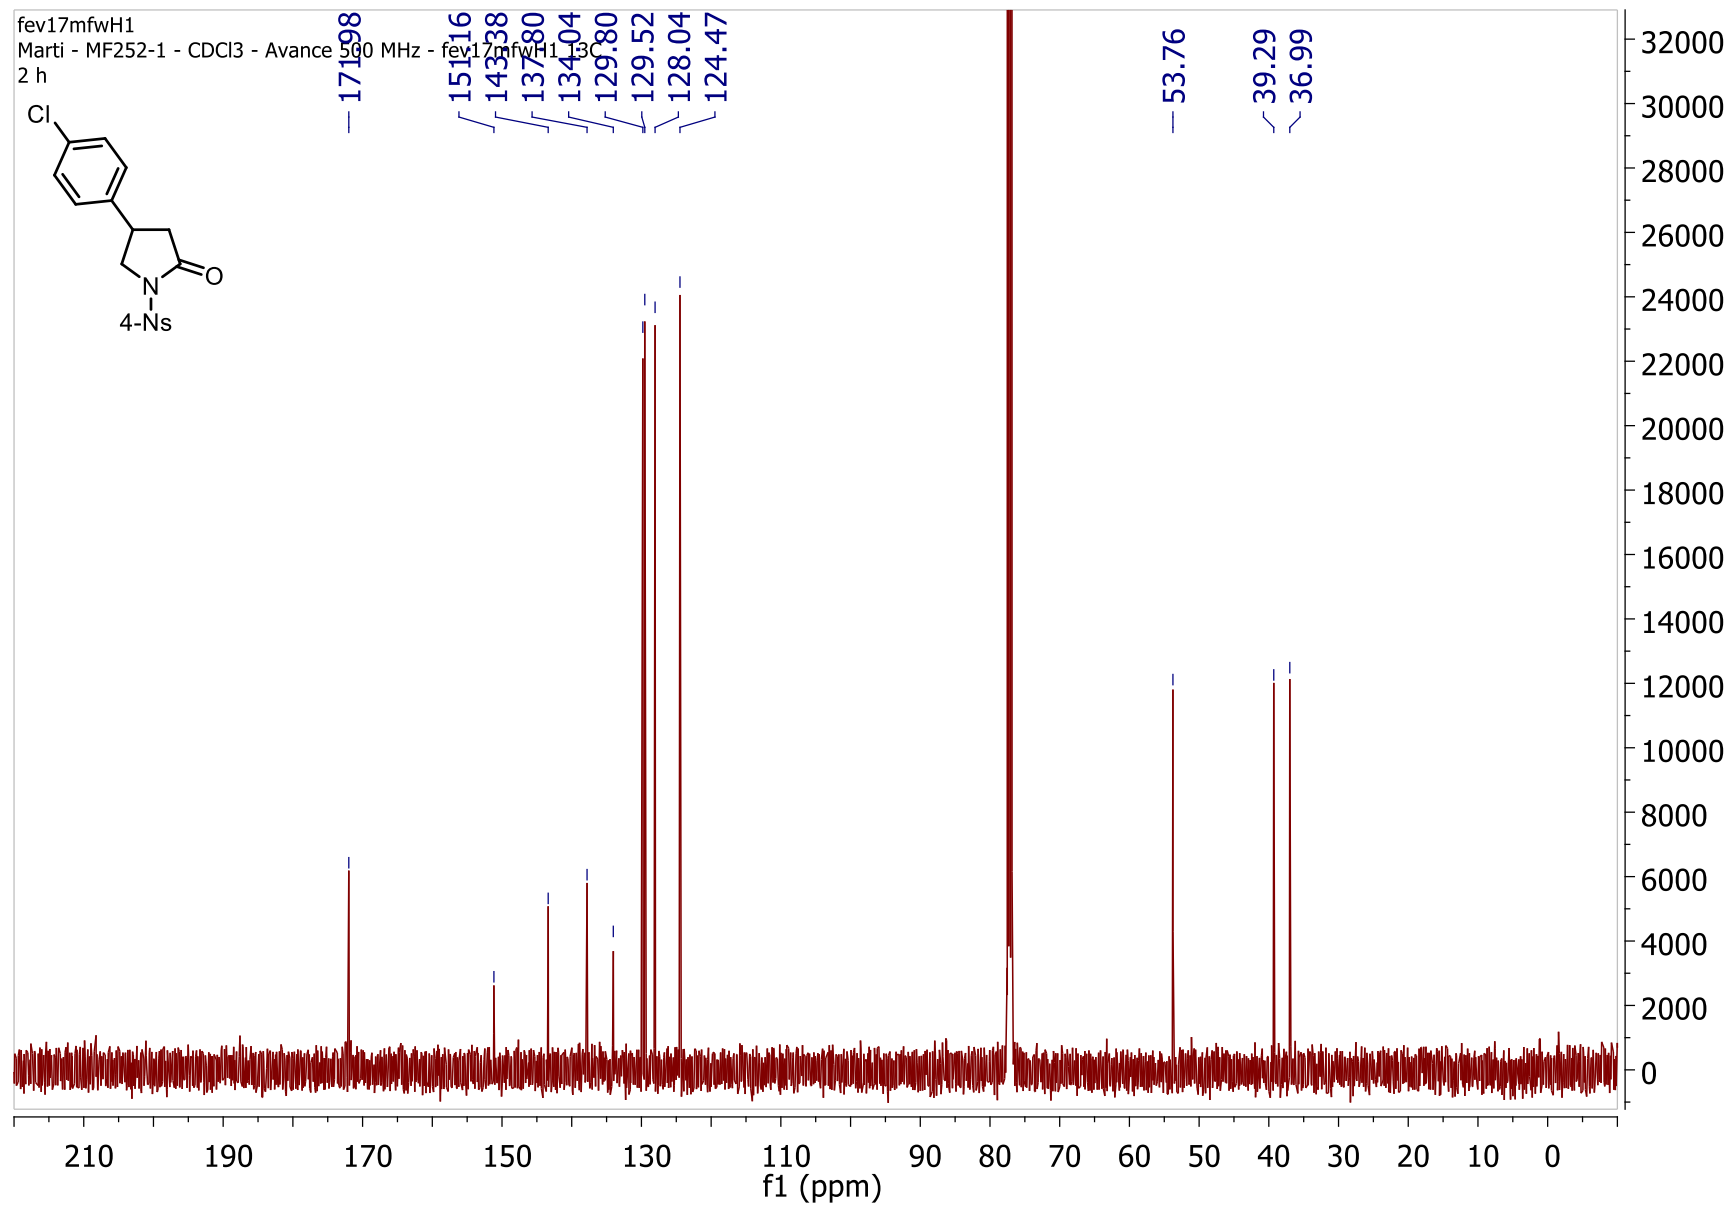

**Figure SI65:** <sup>13</sup>C NMR of compound **4dd**.

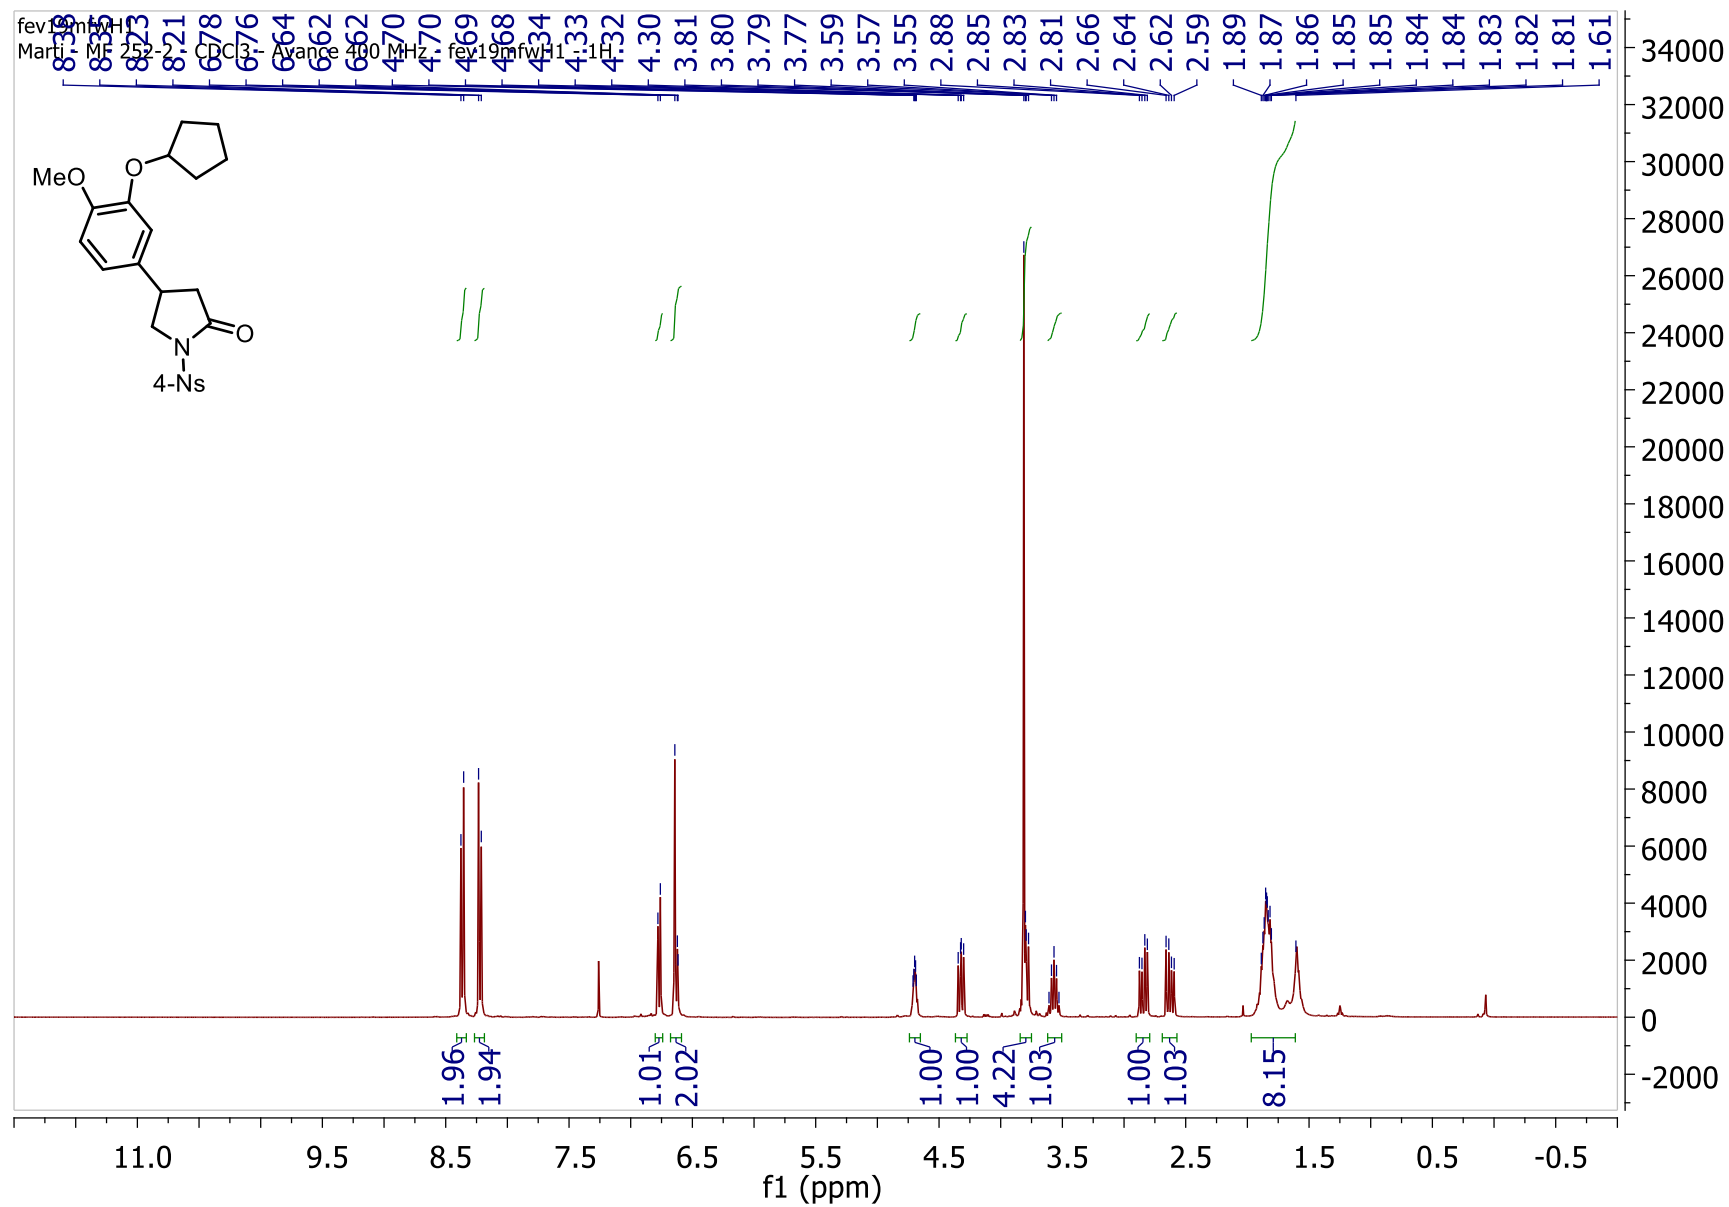

Figure SI66: <sup>1</sup>H NMR of compound **4de**.

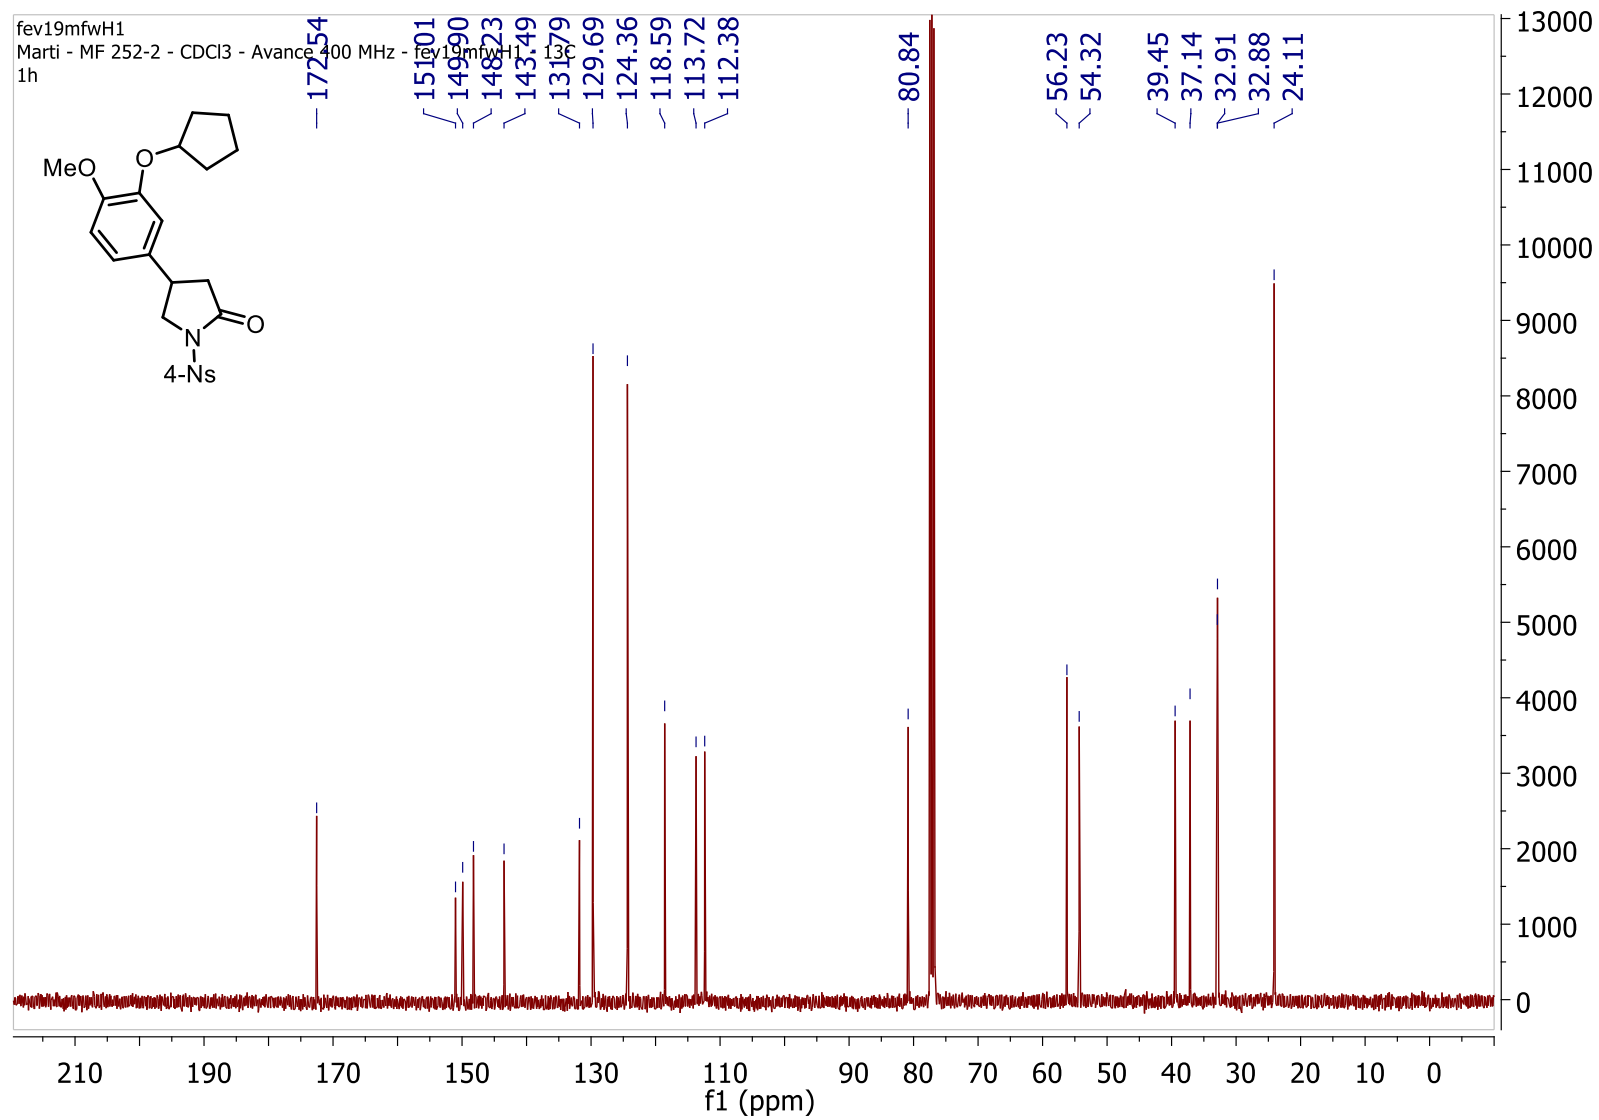

**Figure SI67:** <sup>13</sup>C NMR of compound **4de**.



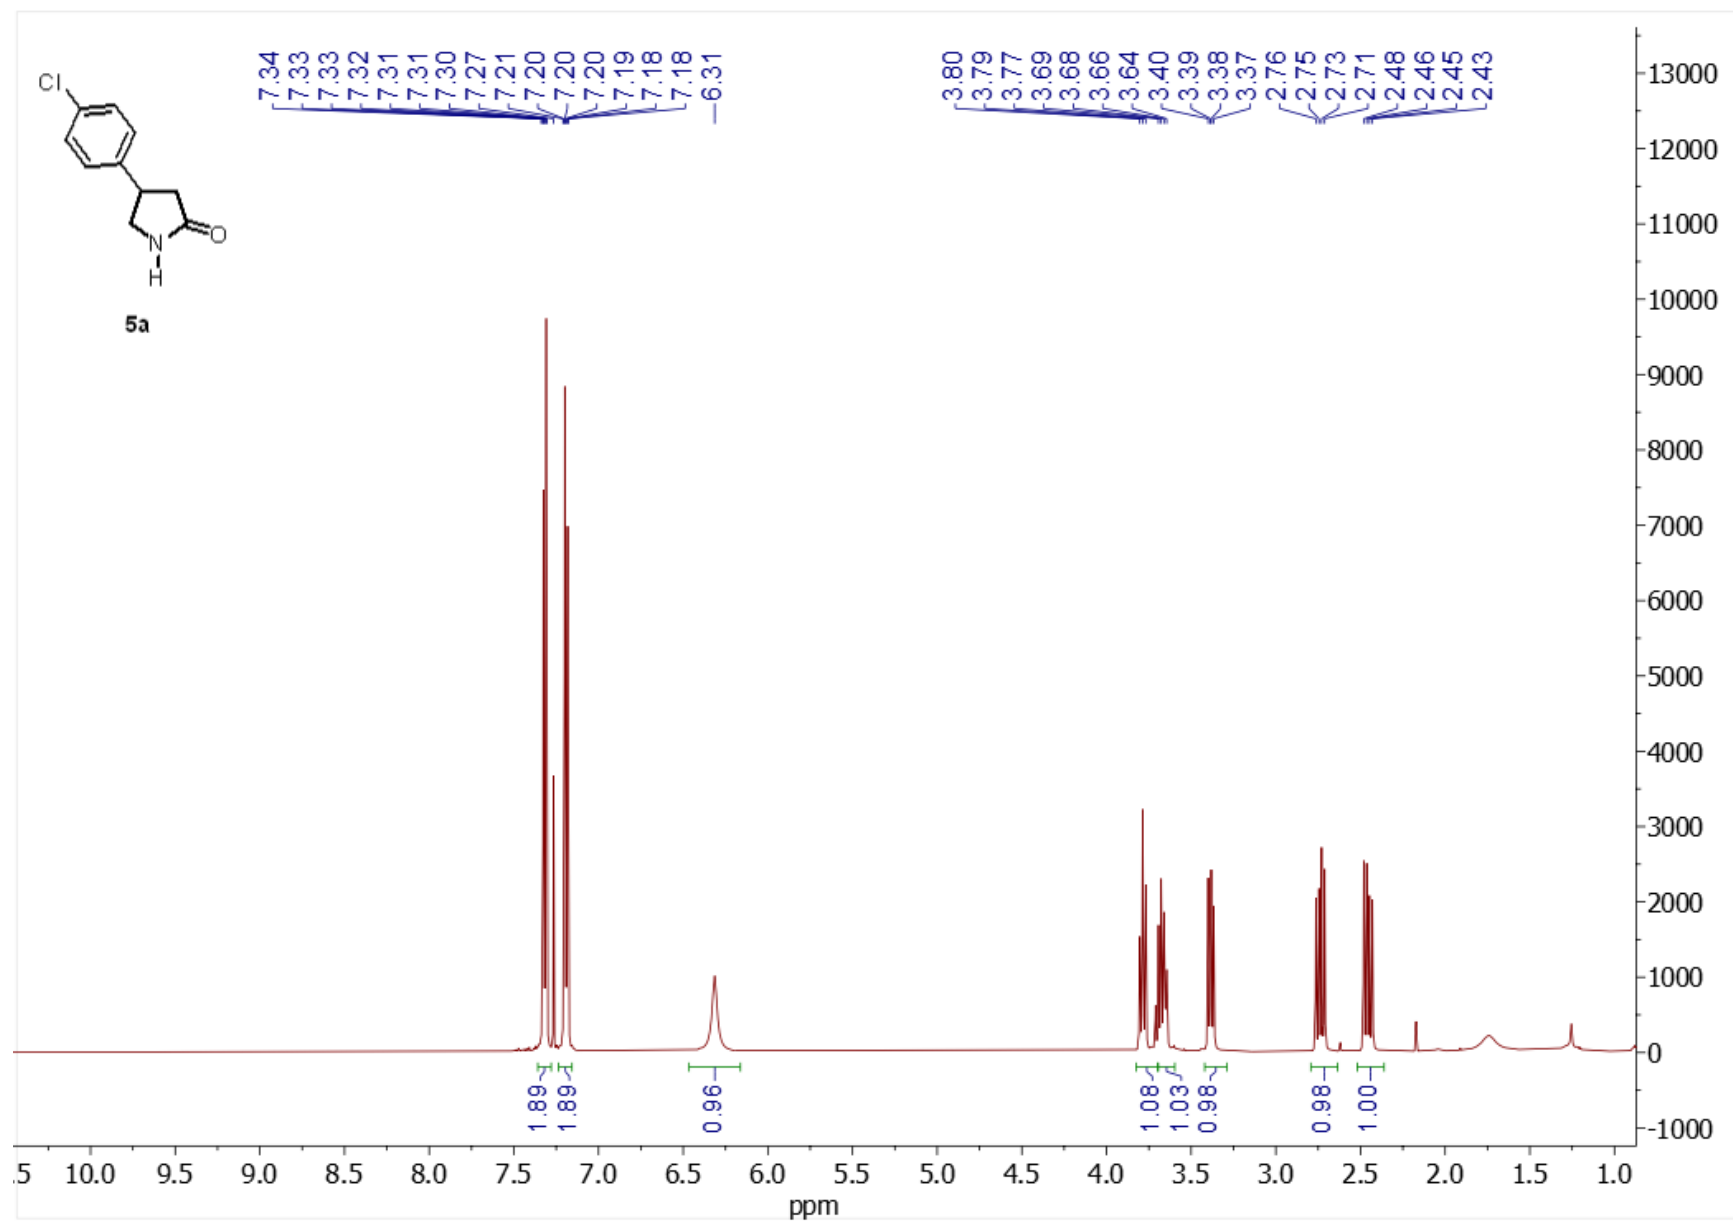

Figure SI68:  $^1\text{H}$  NMR of compound **5a**.

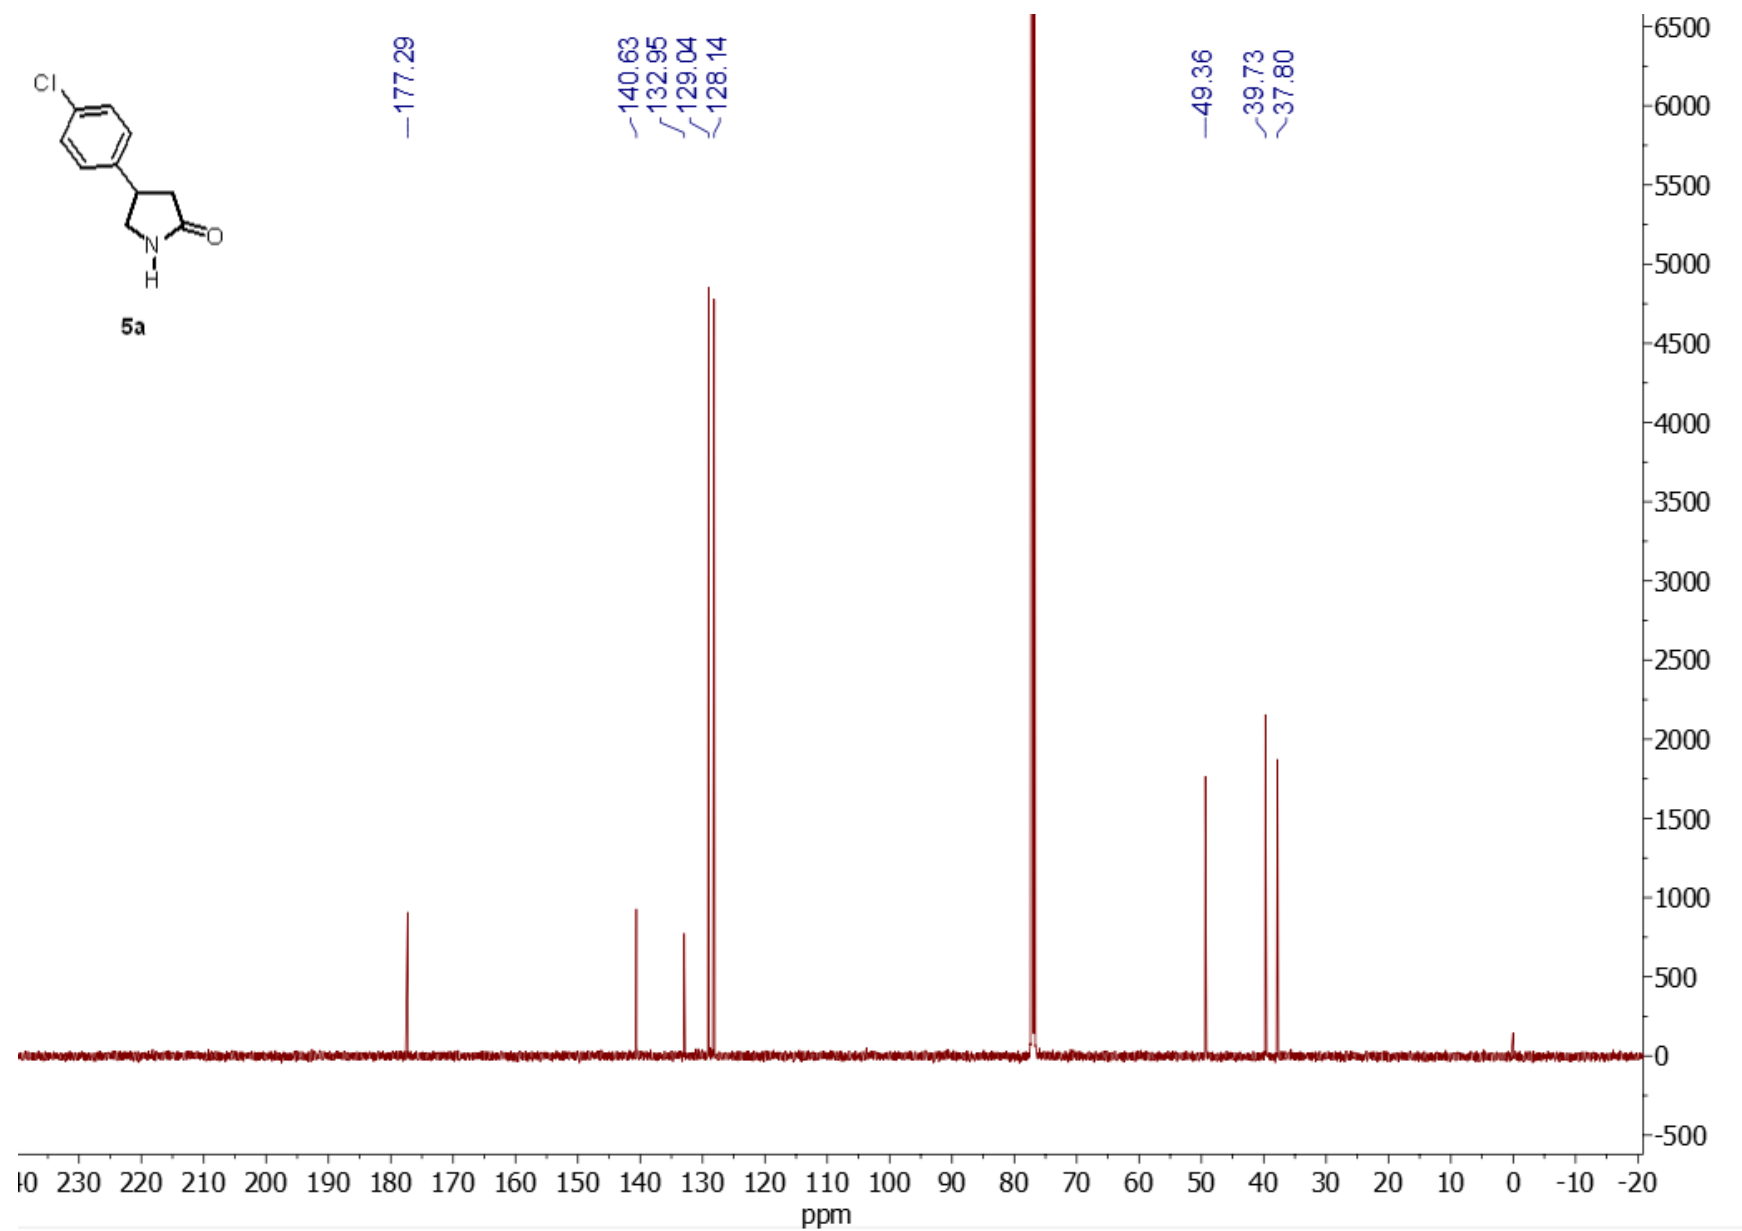

**Figure SI69:**  $^{13}\text{C}$  NMR of compound **5a**.

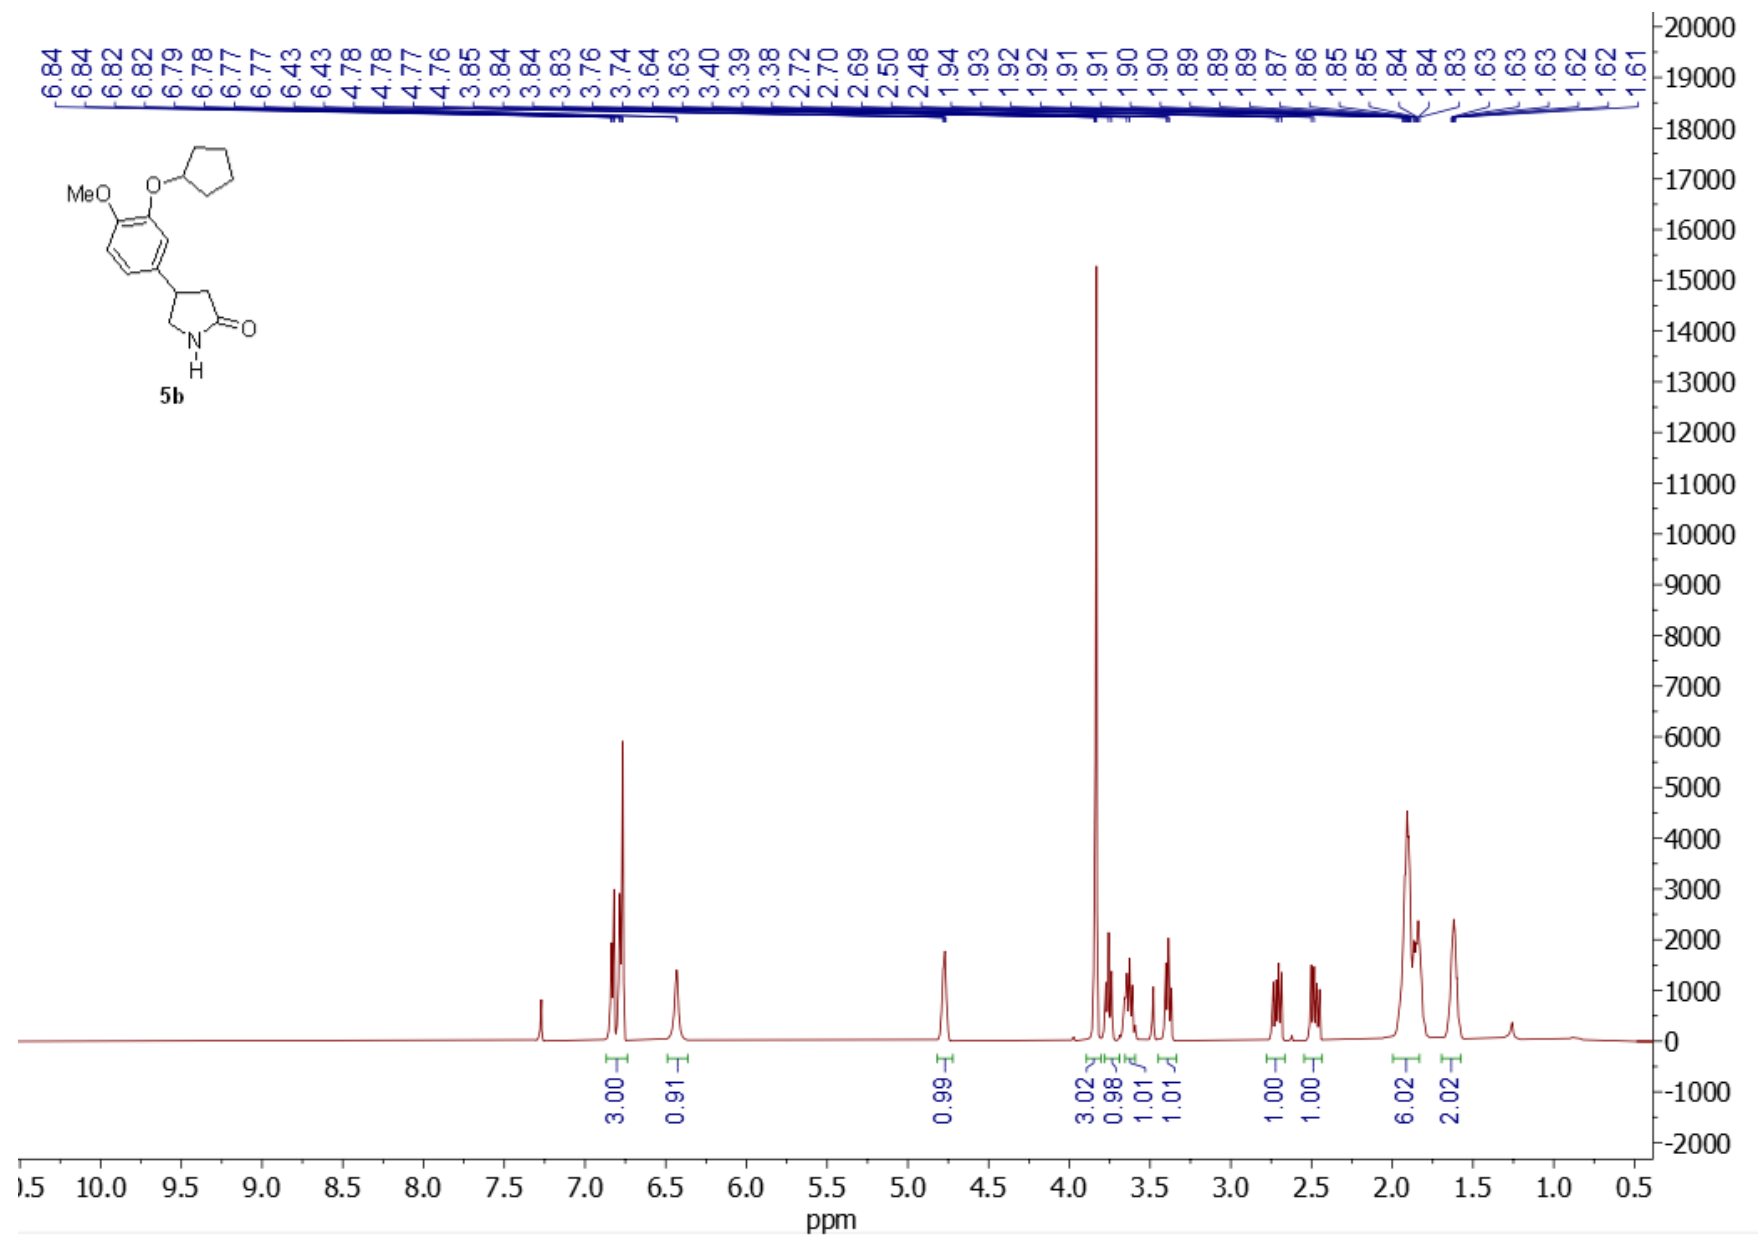

**Figure SI70:** <sup>1</sup>H NMR of compound **5b**.

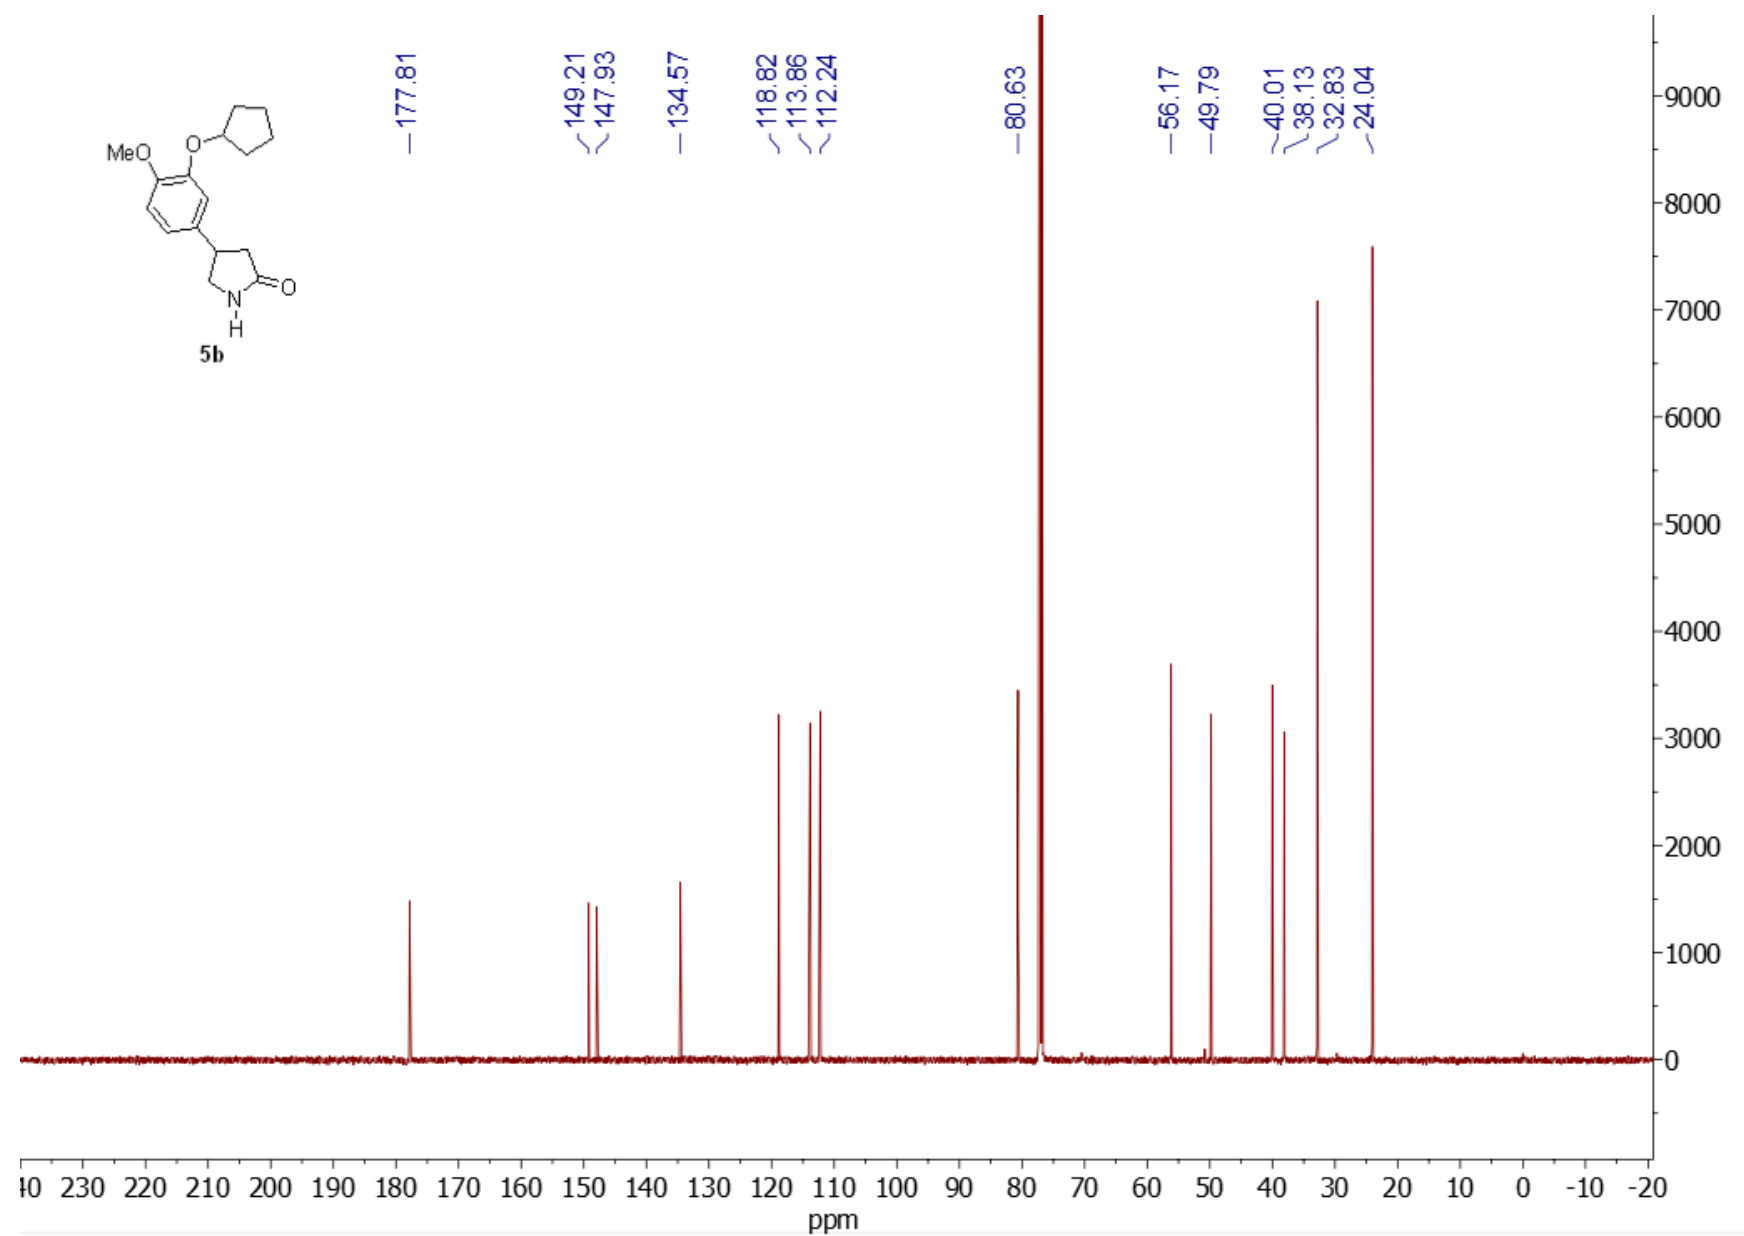

**Figure SI71:**  $^{13}\text{C}$  NMR of compound **5b**.

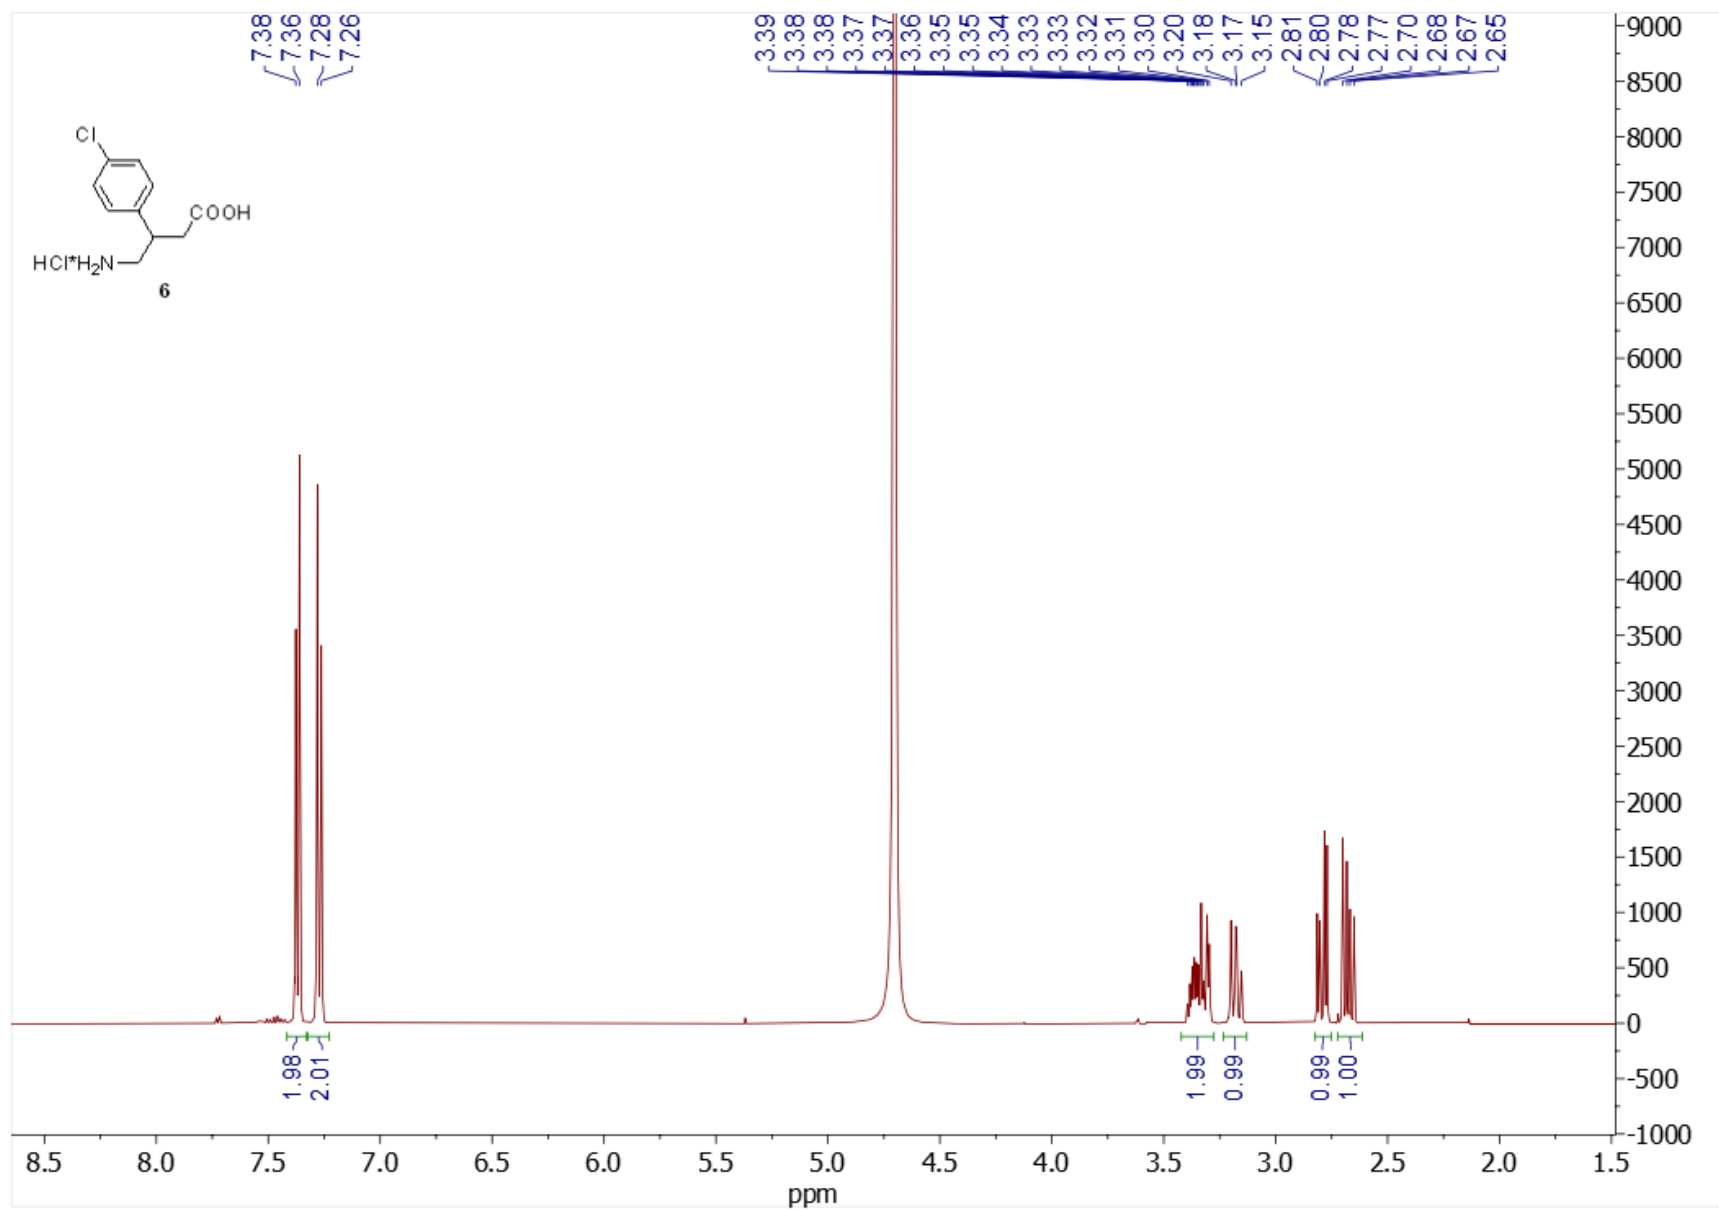

Figure SI72: <sup>1</sup>H NMR of compound 6.

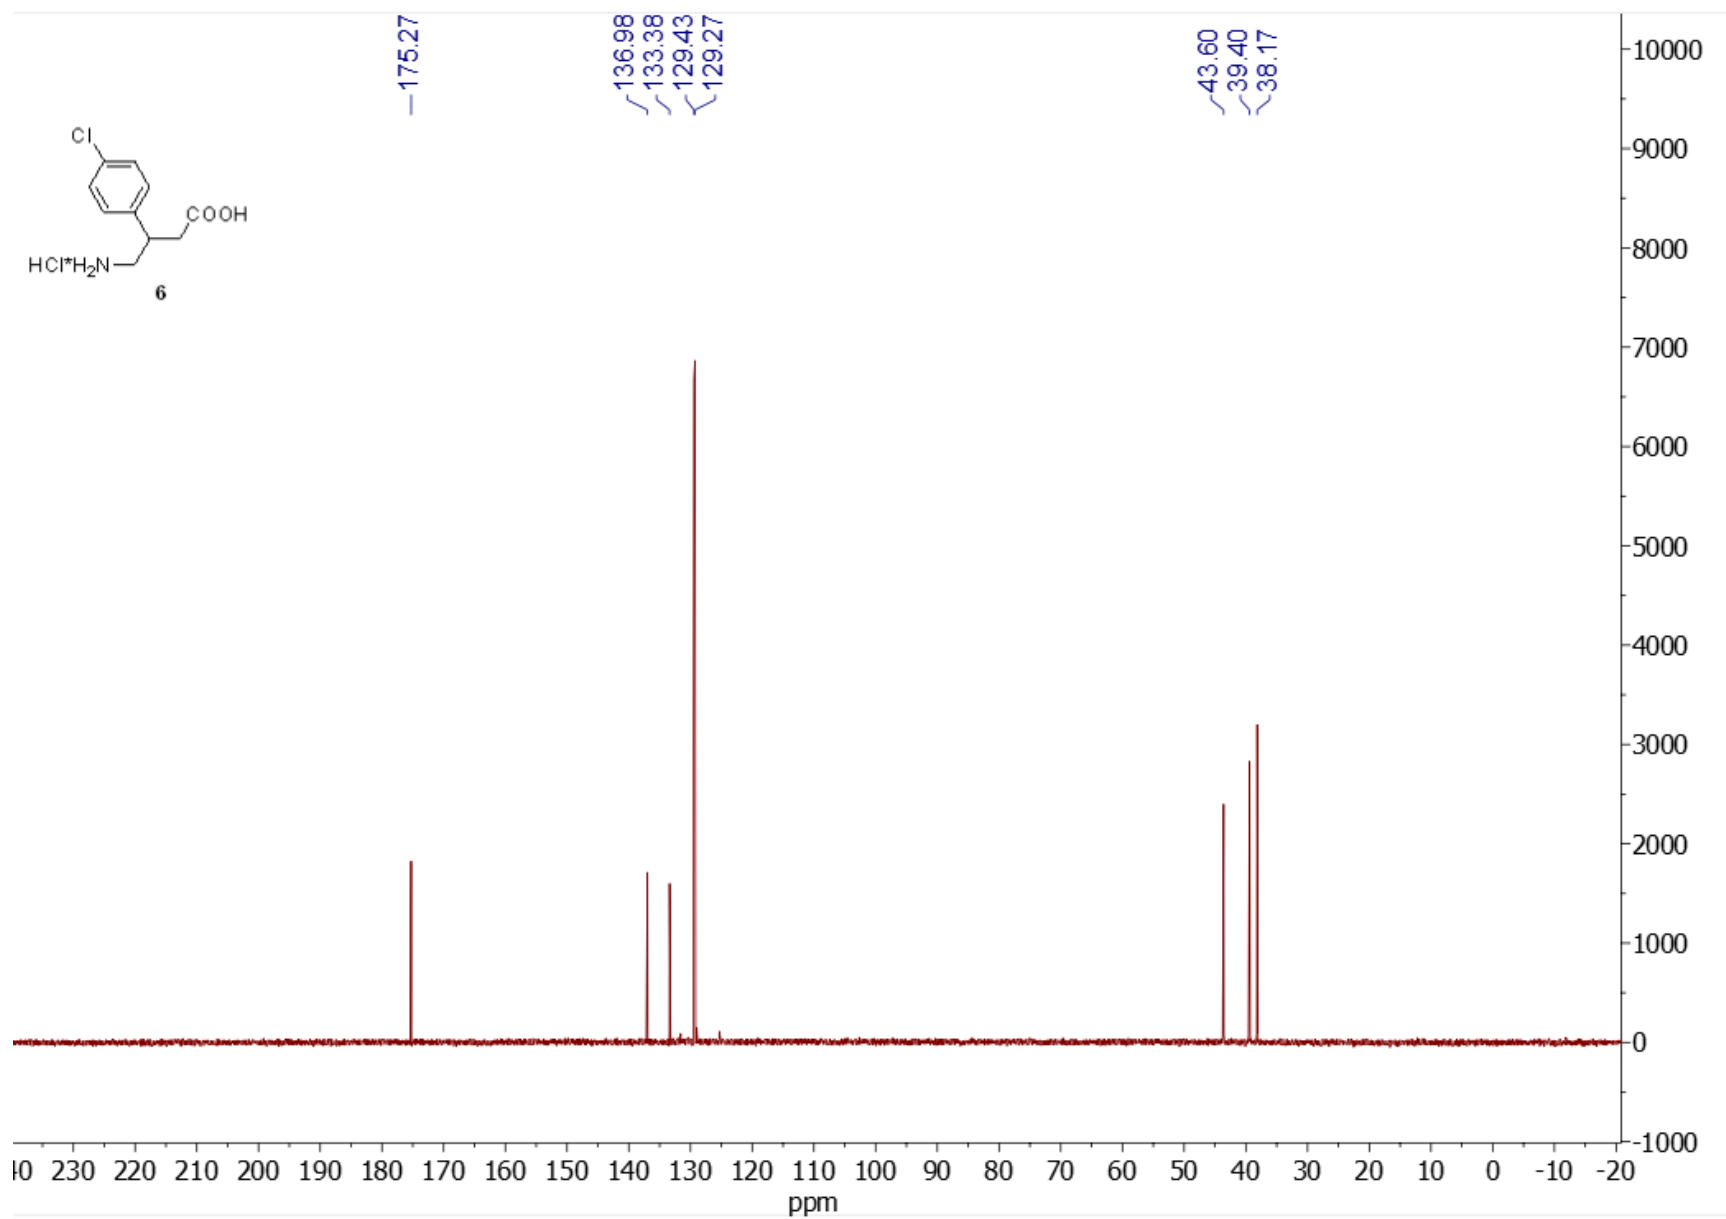

Figure SI73: <sup>13</sup>C NMR of compound 6.

dez20agoHq1.1.fid  
Arnaldo - pyrabox - CDCl<sub>3</sub> - Avance 600 MHz - dez20agoHq1  
1 hr 10 min

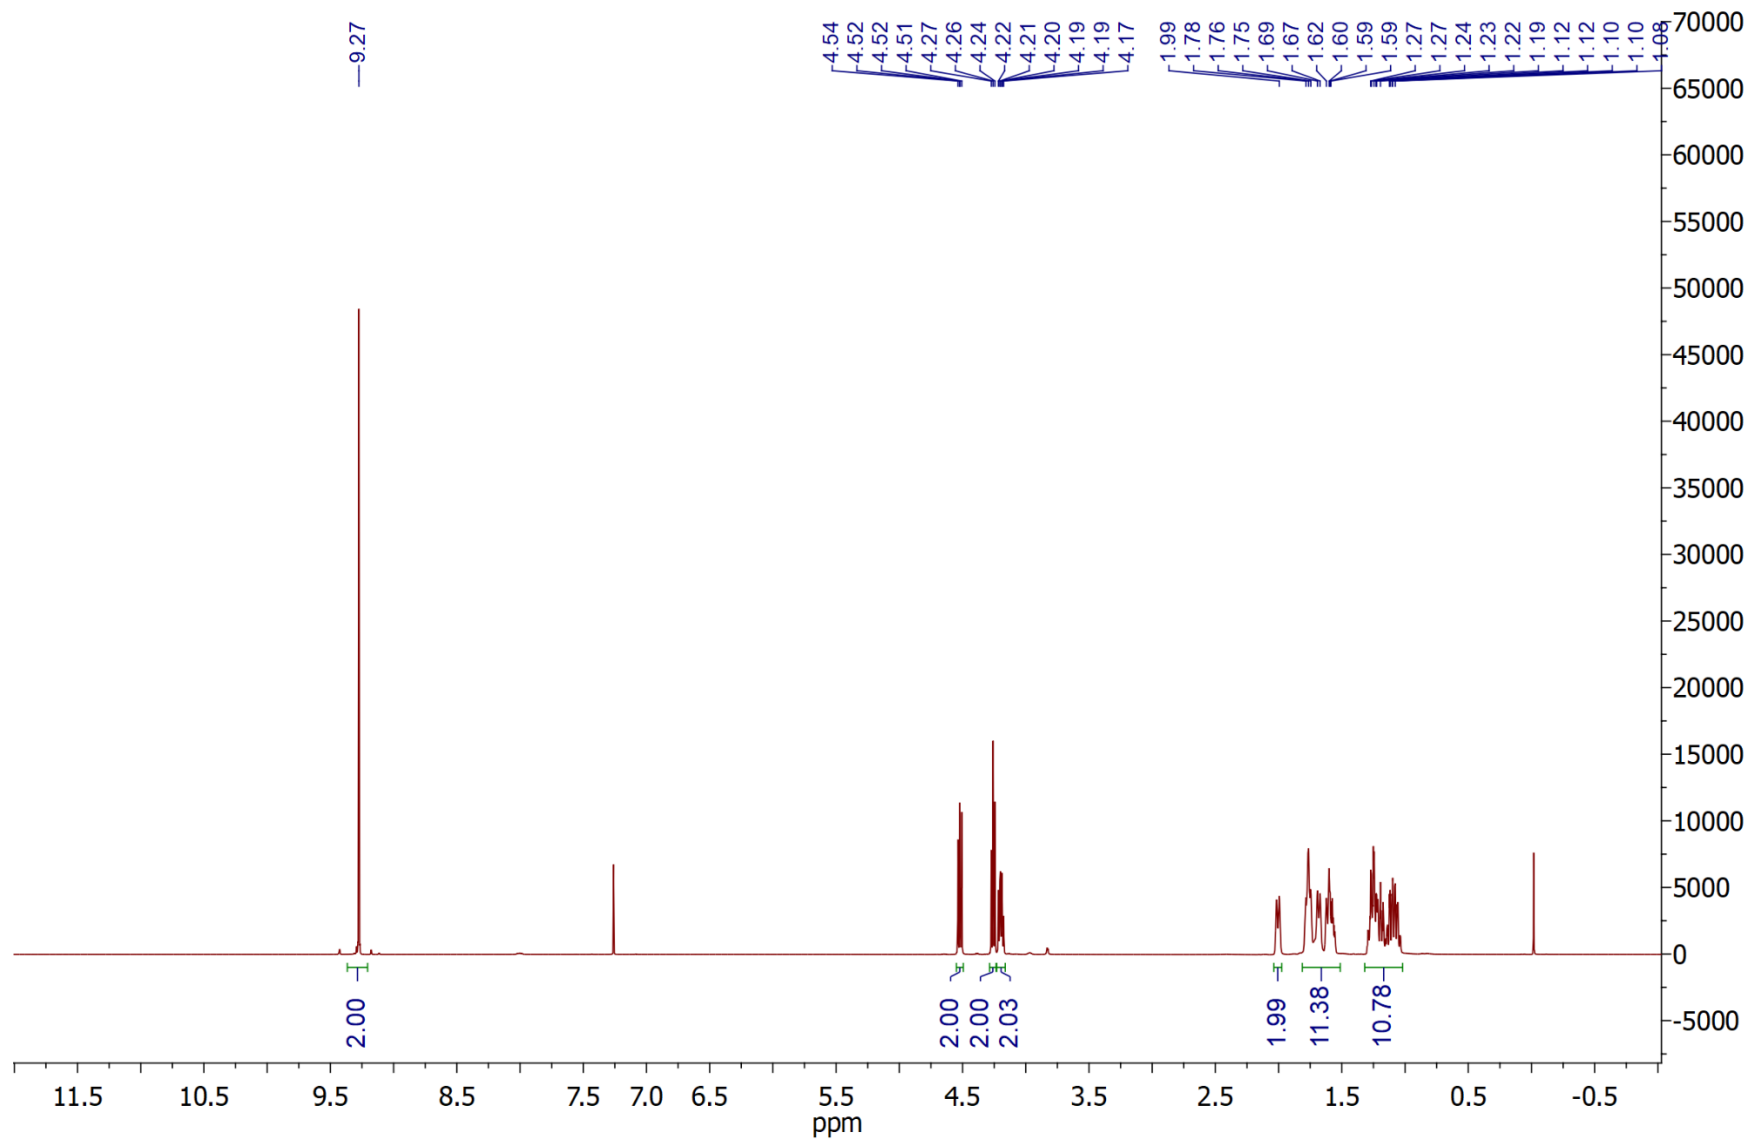

**Figure SI74:** <sup>1</sup>H NMR of ligand L2.

dez12agoH4.2.fid  
Pyrabox Cy - Arnaldo Oliveira - Bruker 250 MHz - CDCl<sub>3</sub>

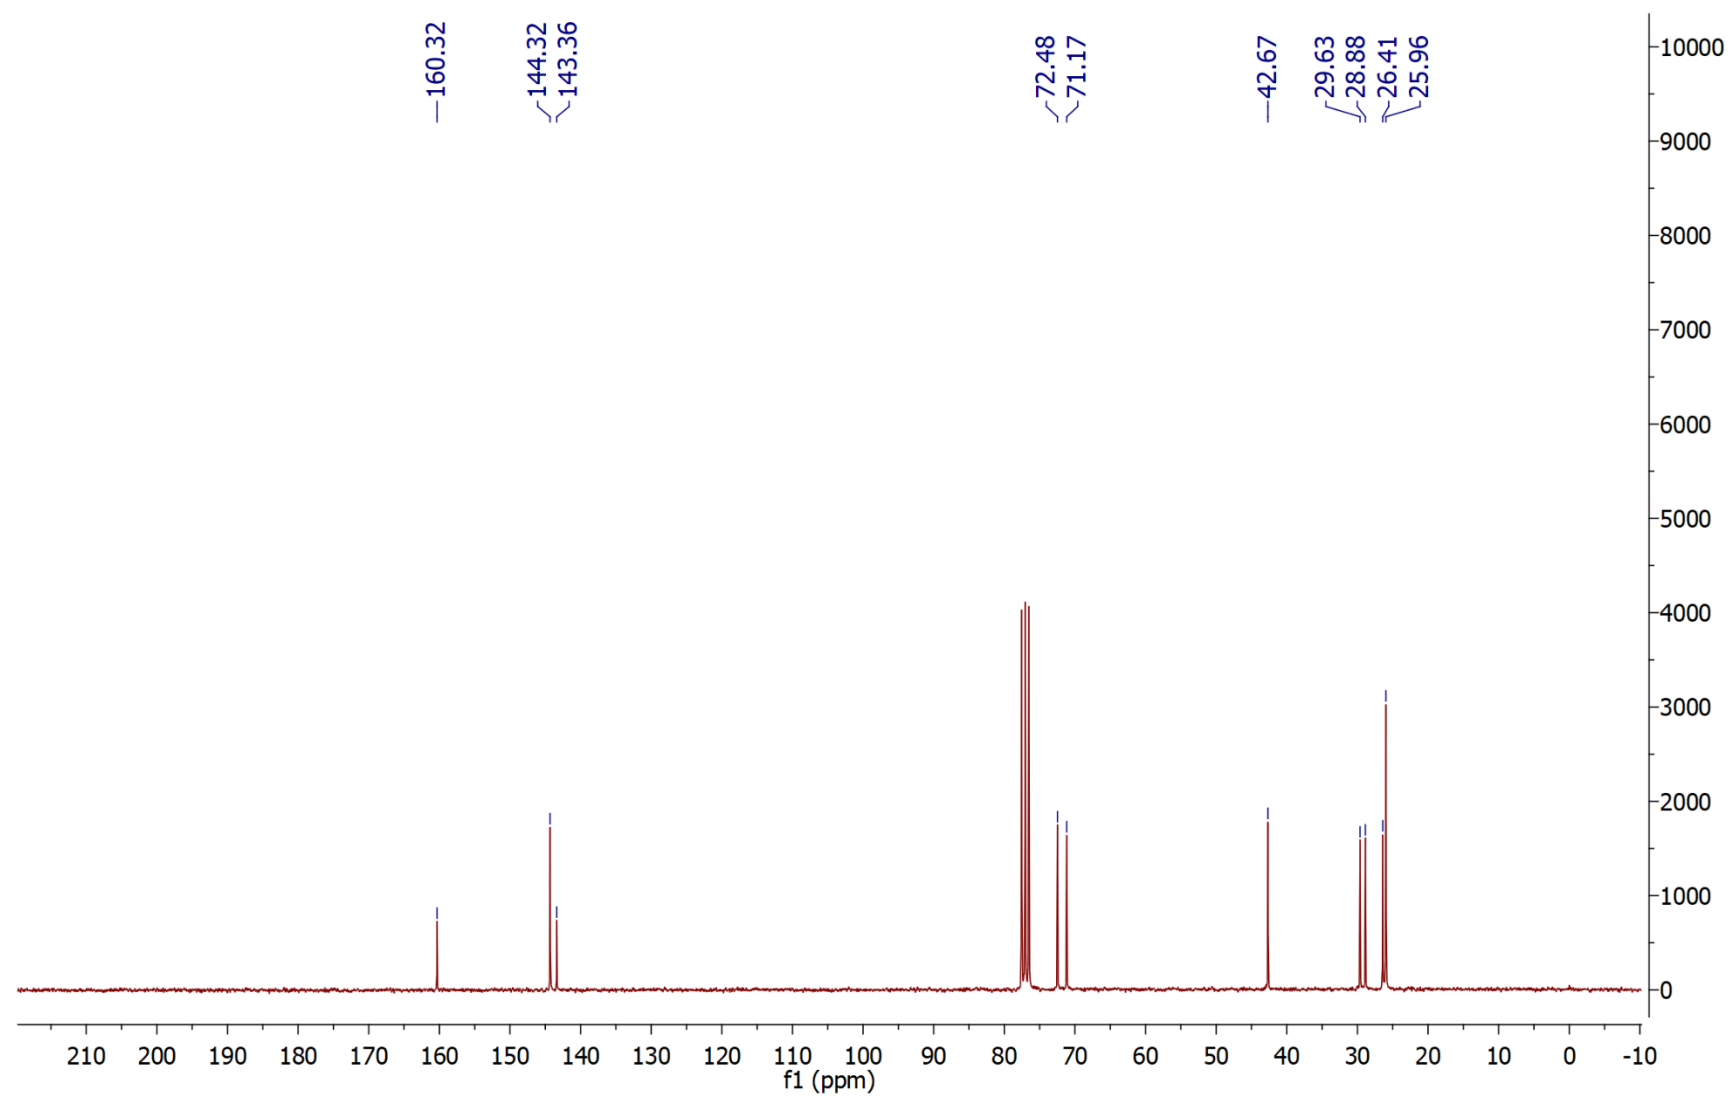

**Figure SI75:** <sup>13</sup>C NMR of ligand L2.



## 7. References

- (1) Oliveira, C. C.; Pfaltz, A.; Correia, C. R. D. *Angew. Chem. Int. Ed* **2015**, *54*, 4036–14039.
- (2) Li, Y.; Li, Y.; Peng, L.; Wu, D.; Zhu, L.; Yin, G. *Chem. Sci.* **2020**, *11*, 10461–10464.
- (3) Werner, E. W.; Mei, T. S.; Burckle, A. J.; Sigman, M. S. *Science (1979)* **2012**, *338*, 1455–1458.
- (4) Sandford, C.; Fries, L. R.; Ball, T. E.; Minter, S. D.; Sigman, M. S. *J Am Chem Soc* **2019**, *141*, 18877–18889.
- (5) Cerezo, S.; Cortés, J.; Moreno-Mañas, M.; Pleixats, R.; Roglans, A. *Tetrahedron* **1998**, *54*, 14869–14884.
- (6) So, C. M.; Kume, S.; Hayashi, T. *J. Am. Chem. Soc.* **2013**, *135*, 10990–10993.
- (7) Longshaw, A. I.; Adanitsch, F.; Gutierrez, J. A.; Evans, G. B.; Tyler, P. C.; Schramm, V. L. *J Med Chem* **2010**, *53*, 6730–6746.
- (8) Do, J.-L.; Mottillo, C.; Tan, D.; Strukil, V.; Friščić, T. C.; *J. Am. Chem. Soc.* **2015**, *137*, 7, 2476.
- (9) Shao, C.; Yu, H. J.; Wu, N. Y.; Tian, P.; Wang, R.; Feng, C. G.; Lin, G. Q. *Org Lett* **2011**, *13*, 788–791.
